# Supplementary material for: Genome Sequencing and analyses of Two Marine Fungi from the North Sea Unraveled a Plethora of Novel Biosynthetic Gene Clusters
Source: Sci Rep. 2018 Jul 5;8:10187. doi: 10.1038/s41598-018-28473-z (PMC6033941; doi:10.1038/s41598-018-28473-z)
Supplement: Supplementary file 4 — Table S3 [file 41598_2018_28473_MOESM4_ESM.xlsx]

## Sheet: TableS3
Gene ID	Scaffold ID	Gene Description	Seq. Length	#Hits	min. eValue	mean Similarity	#GOs	GOs	Enzyme Codes
g1	scaffold00001	hypothetical protein VE00_01261	597	10	8.33557e-171	66.0%	0	-
g10	scaffold00001	transcription fungi	989	10	0.0	58.9%	0	-
g100	scaffold00001	predicted protein	797	10	5.58747e-122	51.5%	0	-
g1000	scaffold00002	---NA---	158	0			0	-
g10000	scaffold00025	---NA---	718	0			0	-
g10001	scaffold00025	nad -binding domain-containingprotein	252	10	3.03277e-130	70.4%	0	-
g10002	scaffold00025	carboxy-muconate cyclase	393	10	0.0	65.7%	0	-
g10003	scaffold00025	---NA---	88	0			0	-
g10004	scaffold00025	hypothetical protein PFICI_12699	412	10	5.73363e-156	56.3%	0	-
g10005	scaffold00025	ohcu decarboxylase protein	266	10	9.7081e-141	67.0%	0	-
g10006	scaffold00025	cell cycle control protein	787	10	0.0	83.6%	0	-
g10007	scaffold00025	---NA---	482	0			0	-
g10008	scaffold00025	cell cycle control protein	695	10	2.72273e-77	56.2%	0	-
g10009	scaffold00025	---NA---	171	0			0	-
g1001	scaffold00002	beta-galactosidase	1294	10	0.0	76.4%	0	-
g10010	scaffold00025	---NA---	315	0			0	-
g10011	scaffold00025	mfs transporter	695	10	0.0	78.3%	2	P:transmembrane transport; C:integral to membrane	-
g10012	scaffold00025	chaperone hcha	187	10	3.10739e-62	71.3%	0	-
g10013	scaffold00025	nfx1-type zinc finger-containing protein 1	408	10	5.3856e-15	72.4%	6	F:metal ion binding; P:regulation of transcription, DNA-dependent; F:zinc ion binding; C:nucleus; F:sequence-specific DNA binding transcription factor activity; F:helicase activity
g10014	scaffold00025	molecular chaperone hsp31 and glyoxalase 3	69	10	1.04507e-31	86.1%	0	-
g10015	scaffold00025	hypothetical protein PFICI_01715	1530	10	0.0	66.0%	2	F:carbohydrate binding; P:cell adhesion	-
g10016	scaffold00025	---NA---	460	0			0	-
g10017	scaffold00025	---NA---	116	0			0	-
g10018	scaffold00025	hypothetical protein PFICI_01714	349	10	0.0	67.2%	0	-
g10019	scaffold00025	rhodanese-like protein	211	7	1.53444e-58	53.57%	0	-
g1002	scaffold00002	---NA---	286	0			0	-
g10020	scaffold00025	hypothetical protein PFICI_01712	188	2	4.40954e-113	84.5%	0	-
g10021	scaffold00025	kinase suppressor of ras 2	326	1	2.13542	48.0%	0	-
g10022	scaffold00025	---NA---	512	0			0	-
g10023	scaffold00025	sirq protein	419	10	0.0	81.3%	0	-
g10024	scaffold00025	hypothetical protein PFICI_02265	423	1	2.59329e-113	65.0%	0	-
g10025	scaffold00025	hypothetical protein PFICI_02264	339	1	1.17631e-93	66.0%	0	-
g10026	scaffold00025	subtilisin-like protein	731	10	8.79683e-39	43.8%	2	P:proteolysis; F:serine-type endopeptidase activity
g10027	scaffold00025	hypothetical protein TRIATDRAFT_214875	288	10	1.37468e-24	47.8%	0	-
g10028	scaffold00025	hypothetical protein HMPREF1541_03553	478	10	5.81446e-102	51.5%	0	-
g10029	scaffold00025	related to tol protein	948	10	0.0	53.0%	0	-
g1003	scaffold00002	had-superfamily hydrolase subfamily iib protein	249	10	8.45417e-175	92.6%	0	-
g10030	scaffold00025	ethanolamine utilization	126	10	1.18495e-09	54.3%	0	-
g10031	scaffold00025	mfs general substrate transporter	522	10	0.0	67.3%	2	P:transmembrane transport; C:integral to membrane	-
g10032	scaffold00025	---NA---	263	0			0	-
g10033	scaffold00025	phytanoyl- dioxygenase family protein	348	10	3.0394e-165	64.4%	1	F:oxidoreductase activity, acting on single donors with incorporation of molecular oxygen, incorporation of two atoms of oxygen	EC:1.13.11
g10034	scaffold00025	---NA---	118	0			0	-
g10035	scaffold00025	cytochrome p450	595	10	0.0	65.3%	6	F:heme binding; F:oxidoreductase activity, acting on paired donors, with incorporation or reduction of molecular oxygen; F:monooxygenase activity; F:iron ion binding; F:electron carrier activity; P:oxidation-reduction process	-
g10036	scaffold00025	zn -c6 fungal-type dna-binding domain partial	497	10	2.35632e-71	51.8%	5	F:sequence-specific DNA binding RNA polymerase II transcription factor activity; P:regulation of transcription from RNA polymerase II promoter; C:nucleus; F:zinc ion binding; P:transcription from RNA polymerase II promoter	-
g10037	scaffold00025	transcriptional regulator	393	9	0.000508662	43.0%	0	-
g10038	scaffold00025	aldehyde dehydrogenase (nad+)	482	10	0.0	71.1%	2	F:oxidoreductase activity, acting on the aldehyde or oxo group of donors, NAD or NADP as acceptor; P:oxidation-reduction process	-
g10039	scaffold00025	hexose transporter	1016	10	6.21792e-89	56.0%	3	P:transmembrane transport; C:integral to membrane; F:transmembrane transporter activity	-
g1004	scaffold00002	---NA---	99	0			0	-
g10040	scaffold00025	salicylate hydroxylase	500	10	0.0	73.0%	2	P:oxidation-reduction process; F:oxidoreductase activity	-
g10041	scaffold00025	hypothetical protein HMPREF1120_03193	658	10	1.504e-37	43.2%	6	P:regulation of transcription, DNA-dependent; P:transcription from RNA polymerase II promoter; F:sequence-specific DNA binding RNA polymerase II transcription factor activity; F:zinc ion binding; P:regulation of transcription from RNA polymerase II promoter; C:nucleus
g10042	scaffold00025	integral membrane protein	398	10	1.20248e-111	68.4%	0	-
g10043	scaffold00025	---NA---	178	0			0	-
g10044	scaffold00025	nrps-like enzyme	1300	10	0.0	53.4%	0	-
g10045	scaffold00025	---NA---	315	0			0	-
g10046	scaffold00025	tryprostatin b 6-hydroxylase	585	10	0.0	70.7%	0	-
g10047	scaffold00025	Uncharacterized protein LW94_5517	326	10	5.36777e-93	65.0%	2	F:prenyltransferase activity; C:integral to membrane	EC:2.5.1
g10048	scaffold00025	---NA---	125	0			0	-
g10049	scaffold00025	oxygen-dependent choline dehydrogenase	595	10	0.0	74.5%	4	F:flavin adenine dinucleotide binding; F:choline dehydrogenase activity; P:oxidation-reduction process; P:alcohol metabolic process	EC:1.1.99.1
g1005	scaffold00002	ligninase lg6 precursor	303	10	0.0	66.6%	4	F:heme binding; F:peroxidase activity; P:oxidation-reduction process; P:response to oxidative stress	EC:1.11.1.7
g10050	scaffold00025	---NA---	307	0			0	-
g10051	scaffold00025	gmc oxidoreductase	633	10	0.0	64.1%	4	F:flavin adenine dinucleotide binding; F:choline dehydrogenase activity; P:oxidation-reduction process; P:alcohol metabolic process	EC:1.1.99.1
g10052	scaffold00025	---NA---	199	0			0	-
g10053	scaffold00025	related to beta-xylosidase	849	10	0.0	75.5%	2	F:hydrolase activity, hydrolyzing O-glycosyl compounds; P:xylan catabolic process	-
g10054	scaffold00025	---NA---	326	0			0	-
g10055	scaffold00025	saponin hydrolase precursor	628	10	0.0	74.2%	1	F:hydrolase activity	-
g10056	scaffold00025	---NA---	276	0			0	-
g10057	scaffold00025	upc2 protein	392	10	0.0	59.6%	5	F:sequence-specific DNA binding RNA polymerase II transcription factor activity; P:regulation of transcription from RNA polymerase II promoter; C:nucleus; F:zinc ion binding; P:transcription from RNA polymerase II promoter	-
g10058	scaffold00025	fad-dependent monooxygenase	591	10	0.0	74.0%	0	-
g10059	scaffold00025	---NA---	314	0			0	-
g1006	scaffold00002	---NA---	223	0			0	-
g10060	scaffold00025	---NA---	192	0			0	-
g10061	scaffold00025	related to alpha- -mannosyltransferase hoc1	331	10	3.69934e-115	70.0%	0	-
g10062	scaffold00025	cytochrome p450 monooxygenase	512	10	0.0	72.8%	0	-
g10063	scaffold00025	---NA---	309	0			0	-
g10064	scaffold00025	c6 transcription protein	224	10	7.58718e-75	58.6%	0	-
g10065	scaffold00025	---NA---	146	0			0	-
g10066	scaffold00025	rta1 protein	288	10	6.49069e-115	72.5%	2	C:integral to membrane; P:response to stress	-
g10067	scaffold00025	hypothetical protein MAC_03610	249	3	1.22075e-21	54.33%	0	-
g10068	scaffold00025	beta- -d-glucosidase	778	10	0.0	79.9%	0	-
g10069	scaffold00025	---NA---	455	0			0	-
g1007	scaffold00002	fcp1-like phosphatase	803	10	0.0	68.5%	0	-
g10070	scaffold00025	sterol 3-beta-glucosyltransferase ugt80a2	840	10	0.0	73.7%	0	-
g10071	scaffold00025	hypothetical protein MPH_02361	359	1	1.46643e-21	63.0%	0	-
g10072	scaffold00025	catabolic 3-dehydroquinase 2	150	10	1.11037e-65	80.7%	2	F:3-dehydroquinate dehydratase activity; P:quinate metabolic process	EC:4.2.1.10
g10073	scaffold00025	4-hydroxyphenylpyruvate dioxygenase	111	1	1.68838e-05	57.0%	0	-
g10074	scaffold00025	quinic acid utilization activator	869	10	1.11918e-117	51.2%	6	P:regulation of transcription from RNA polymerase II promoter; F:zinc ion binding; F:sequence-specific DNA binding RNA polymerase II transcription factor activity; F:DNA binding; C:nucleus; P:transcription from RNA polymerase II promoter	-
g10075	scaffold00025	related to negative-acting regulatory protein	860	10	0.0	67.9%	3	F:3-dehydroquinate dehydratase activity; F:shikimate 3-dehydrogenase (NADP+) activity; P:oxidation-reduction process	EC:1.1.1.25; EC:4.2.1.10; EC:1.1.1.282
g10076	scaffold00025	like protein	356	10	1.21609e-75	56.2%	3	F:zinc ion binding; F:oxidoreductase activity; P:oxidation-reduction process	-
g10077	scaffold00025	---NA---	183	0			0	-
g10078	scaffold00025	heterokaryon incompatibility	628	10	1.08484e-157	47.3%	0	-
g10079	scaffold00025	---NA---	167	0			0	-
g1008	scaffold00002	hypothetical protein SPSK_01373	662	1	0.00472809	50.0%	0	-
g10080	scaffold00025	nad dependent epimerase dehydratase family protein	405	10	0.0	77.0%	3	P:cellular metabolic process; F:coenzyme binding; F:catalytic activity	-
g10081	scaffold00025	---NA---	141	0			0	-
g10082	scaffold00025	nad binding nadp oxidoreductase coenzyme f420-	292	10	9.64022e-173	81.5%	5	F:3-hydroxyisobutyrate dehydrogenase activity; P:pentose-phosphate shunt; F:phosphogluconate dehydrogenase (decarboxylating) activity; F:coenzyme binding; P:valine metabolic process	EC:1.1.1.44; EC:1.1.1.31
g10083	scaffold00025	hypothetical protein CCM_06454	391	10	6.00237e-20	55.5%	5	F:metal ion binding; F:DNA binding; F:molecular_function; P:biological_process; C:cellular_component
g10084	scaffold00025	lovastatin nonaketide synthase	85	10	1.88761e-16	73.7%	5	F:transferase activity; P:metabolic process; F:catalytic activity; F:lovastatin nonaketide synthase activity; F:transferase activity, transferring acyl groups
g10085	scaffold00025	alpha- mannosyltransferase ktr1	508	10	0.0	90.9%	3	C:membrane; F:mannosyltransferase activity; P:protein glycosylation	EC:2.4.1
g10086	scaffold00025	---NA---	272	0			0	-
g10087	scaffold00025	dihydroxy-acid dehydratase	614	10	0.0	90.6%	2	P:branched-chain amino acid biosynthetic process; F:dihydroxy-acid dehydratase activity	EC:4.2.1.9
g10088	scaffold00025	two component transcriptional winged helix family	482	10	4.41018e-39	45.7%	0	-
g10089	scaffold00025	---NA---	230	0			0	-
g1009	scaffold00002	nadh-ubiquinone oxidoreductase subunit grim-19 protein	118	10	1.33278e-68	88.4%	0	-
g10090	scaffold00025	hypothetical protein PFICI_12751	327	10	0.0	74.3%	1	F:chromatin binding	-
g10091	scaffold00025	myb dna-binding domain protein	502	10	1.4768e-138	86.3%	2	F:DNA binding; F:chromatin binding	-
g10092	scaffold00025	hypothetical protein PFICI_12753	309	10	4.11553e-61	58.4%	0	-
g10093	scaffold00025	hypothetical protein VP1G_11453	136	1	0.256302	59.0%	0	-
g10094	scaffold00025	ribosome assembly protein rrb1 protein	497	10	0.0	86.9%	1	C:nucleus	-
g10095	scaffold00025	hypothetical protein VP1G_11453	523	2	1.65277e-48	63.0%	0	-
g10096	scaffold00025	chitin synthase export chaperone	336	10	0.0	90.2%	0	-
g10097	scaffold00025	choline dehydrogenase	116	3	0.0319994	54.67%	0	-
g10098	scaffold00025	hypothetical protein PFICI_12757	184	10	3.99431e-64	67.6%	0	-
g10099	scaffold00025	---NA---	180	0			0	-
g101	scaffold00001	mannan endo- -beta-mannosidase c	411	10	0.0	84.3%	0	-
g1010	scaffold00002	---NA---	123	0			0	-
g10100	scaffold00025	related to galactinol synthase	361	10	0.0	77.2%	0	-
g10101	scaffold00025	---NA---	206	0			0	-
g10102	scaffold00025	2-epi-5-epi-valiolone synthase	477	10	0.0	85.1%	1	C:cellular_component
g10103	scaffold00025	catechol o-methyltransferase	641	10	6.2583e-174	79.3%	0	-
g10104	scaffold00025	---NA---	247	0			0	-
g10105	scaffold00025	carbamoylphosphate synthase large subunit	512	10	0.0	66.8%	3	F:metal ion binding; F:ATP binding; F:O-methyltransferase activity	EC:2.1.1
g10106	scaffold00025	---NA---	101	0			0	-
g10107	scaffold00025	alcohol dehydrogenase	464	10	1.32827e-158	84.0%	2	P:oxidation-reduction process; F:oxidoreductase activity	-
g10108	scaffold00025	---NA---	152	0			0	-
g10109	scaffold00025	linear gramicidin synthase subunit d	1048	10	0.0	65.7%	0	-
g1011	scaffold00002	---NA---	306	0			0	-
g10110	scaffold00025	---NA---	302	0			0	-
g10111	scaffold00025	wd repeat domain-containing protein	1091	10	0.0	68.5%	0	-
g10112	scaffold00025	thioredoxin-like protein 1	142	10	7.42417e-60	70.1%	0	-
g10113	scaffold00025	hypothetical protein PFICI_12766	332	10	0.0	61.1%	0	-
g10114	scaffold00025	---NA---	339	0			0	-
g10115	scaffold00025	translation factor protein	403	10	0.0	85.8%	0	-
g10116	scaffold00025	aldo-keto reductase-like protein	293	10	0.0	80.3%	2	P:oxidation-reduction process; F:oxidoreductase activity	-
g10117	scaffold00025	---NA---	206	0			0	-
g10118	scaffold00025	hypothetical protein SPBR_04586	495	3	3.20587e-24	48.0%	0	-
g10119	scaffold00025	sugar porter family mfs transporter	807	10	0.0	80.1%	0	-
g1012	scaffold00002	hypothetical protein PFICI_03954	388	1	1.15439e-54	53.0%	0	-
g10120	scaffold00025	hypothetical protein PFICI_12770	245	10	6.04208e-120	54.7%	0	-
g10121	scaffold00025	nad -binding protein	364	10	6.32998e-162	67.3%	0	-
g10122	scaffold00025	---NA---	136	0			0	-
g10123	scaffold00025	---NA---	316	0			0	-
g10124	scaffold00025	dna-directed rna polymerase iii subunit protein	602	10	5.77984e-114	61.2%	3	F:molecular_function; P:biological_process; C:cellular_component
g10125	scaffold00025	hypothetical protein PFICI_12773	363	10	0.0	73.4%	0	-
g10126	scaffold00025	aaa family atpase	987	10	0.0	74.7%	3	P:mycelium development; F:ATP binding; F:nucleoside-triphosphatase activity	EC:3.6.1.15
g10127	scaffold00025	potassium ion channel yvc1 protein	637	10	0.0	86.4%	0	-
g10128	scaffold00025	---NA---	499	0			0	-
g10129	scaffold00025	---NA---	125	0			0	-
g1013	scaffold00002	---NA---	139	0			0	-
g10130	scaffold00025	sugar transporter family protein	516	10	0.0	84.2%	4	C:integral to membrane; P:transmembrane transport; F:transmembrane transporter activity; P:carbohydrate transport	-
g10131	scaffold00025	hypothetical protein CLUG_05467	255	1	7.10405e-15	42.0%	0	-
g10132	scaffold00025	hypothetical protein PFICI_12778	532	1	2.82142e-15	49.0%	0	-
g10133	scaffold00025	---NA---	433	0			0	-
g10134	scaffold00025	pentatricopeptide repeat domain-containing protein	1362	10	0.0	83.7%	0	-
g10135	scaffold00025	hypothetical protein PFICI_12785	1113	1	3.99529e-38	80.0%	0	-
g10136	scaffold00025	integral membrane protein	477	10	0.0	72.2%	0	-
g10137	scaffold00025	---NA---	143	0			0	-
g10138	scaffold00025	rna exonuclease 4	330	10	0.0	76.3%	2	F:nucleic acid binding; F:exonuclease activity	-
g10139	scaffold00025	---NA---	154	0			0	-
g1014	scaffold00002	hypothetical protein PFICI_03955	150	10	1.72419e-60	55.9%	0	-
g10140	scaffold00025	dhhc zinc finger domain-containing protein	284	10	1.94232e-51	49.1%	0	-
g10141	scaffold00025	hypothetical protein BN1708_003391	350	2	2.03656e-19	46.5%	0	-
g10142	scaffold00025	zinc-binding dehydrogenase	362	10	0.0	88.9%	0	-
g10143	scaffold00025	---NA---	141	0			0	-
g10144	scaffold00025	cytochrome b5-like heme steroid binding domain-containing protein	1363	10	0.0	41.3%	2	F:metal ion binding; F:heme binding
g10145	scaffold00025	---NA---	333	0			0	-
g10146	scaffold00025	---NA---	223	0			0	-
g10147	scaffold00025	hypothetical protein PFICI_04919	263	10	4.55284e-80	52.9%	0	-
g10148	scaffold00025	---NA---	90	0			0	-
g10149	scaffold00025	---NA---	271	0			0	-
g1015	scaffold00002	udp-glucose:sterol glycosyltransferase	1475	10	0.0	76.1%	3	P:lipid glycosylation; F:phospholipid binding; F:transferase activity, transferring hexosyl groups	-
g10150	scaffold00025	diphthine synthase	286	10	0.0	93.5%	3	P:peptidyl-diphthamide biosynthetic process from peptidyl-histidine; F:diphthine synthase activity; P:methylation	EC:2.1.1.98
g10151	scaffold00025	c2h2 finger domain-containing protein	238	10	3.1689e-145	77.5%	1	F:metal ion binding	-
g10152	scaffold00025	---NA---	175	0			0	-
g10153	scaffold00025	hypothetical protein PFICI_04922	473	10	0.0	62.6%	0	-
g10154	scaffold00025	---NA---	169	0			0	-
g10155	scaffold00025	protein bli-3	205	10	7.6792e-138	82.2%	0	-
g10156	scaffold00025	hypothetical protein PFICI_04924	244	10	7.78266e-64	79.8%	0	-
g10157	scaffold00025	hypothetical protein PFICI_04925	284	10	8.86404e-146	71.2%	0	-
g10158	scaffold00025	---NA---	139	0			0	-
g10159	scaffold00025	hypothetical protein PFICI_04929	274	3	1.40329e-44	51.0%	0	-
g1016	scaffold00002	---NA---	421	0			0	-
g10160	scaffold00025	ankyrin repeat protein	394	7	3.17559e-17	46.43%	0	-
g10161	scaffold00025	---NA---	78	0			0	-
g10162	scaffold00026	---NA---	81	0			0	-
g10163	scaffold00026	succinyl- ligase	657	10	0.0	93.6%	3	P:metabolic process; F:ATP binding; F:ligase activity	-
g10164	scaffold00026	hydrolase or acyltransferase (modular protein)	565	10	2.43655e-35	49.5%	1	F:catalytic activity	-
g10165	scaffold00026	fructosamine kinase	322	10	0.0	85.5%	0	-
g10166	scaffold00026	hypothetical protein AAL_05079	398	1	0.160439	41.0%	0	-
g10167	scaffold00026	nicotinamide riboside kinase 1	870	10	3.67026e-142	74.2%	0	-
g10168	scaffold00026	glycoside hydrolase family 15 protein	651	10	0.0	78.6%	0	-
g10169	scaffold00026	sart-1 family protein	658	10	0.0	76.3%	0	-
g1017	scaffold00002	ygl102c-like protein	163	10	2.17229e-22	57.8%	0	-
g10170	scaffold00026	---NA---	483	0			0	-
g10171	scaffold00026	glycoside hydrolase family 36 protein	729	10	0.0	77.5%	0	-
g10172	scaffold00026	hypothetical protein PFICI_14947	949	1	2.56963e-53	62.0%	0	-
g10173	scaffold00026	hypothetical protein PFICI_14948	624	10	2.55631e-166	55.2%	0	-
g10174	scaffold00026	fungal specific transcription factor	527	10	7.38157e-149	52.3%	6	P:regulation of transcription from RNA polymerase II promoter; F:zinc ion binding; F:sequence-specific DNA binding RNA polymerase II transcription factor activity; F:DNA binding; C:nucleus; P:transcription from RNA polymerase II promoter	-
g10175	scaffold00026	vegetative incompatibility protein het-e-1	621	10	5.54492e-135	64.0%	0	-
g10176	scaffold00026	hypothetical protein MGG_05819	175	10	8.54436e-50	64.7%	0	-
g10177	scaffold00026	hypothetical protein	359	10	1.1835e-44	55.8%	0	-
g10178	scaffold00026	cue domain-containing protein	521	10	1.28919e-09	69.4%	0	-
g10179	scaffold00026	cytochrome p450	621	10	1.70088e-161	64.0%	6	F:heme binding; F:oxidoreductase activity, acting on paired donors, with incorporation or reduction of molecular oxygen; F:monooxygenase activity; F:iron ion binding; F:electron carrier activity; P:oxidation-reduction process	-
g1018	scaffold00002	60s ribosomal protein l27a	179	10	1.25828e-89	95.6%	3	C:ribosome; F:structural constituent of ribosome; P:translation	-
g10180	scaffold00026	pre-rrna processing protein	851	10	0.0	78.6%	0	-
g10181	scaffold00026	duf974 domain-containing protein	372	10	0.0	71.1%	0	-
g10182	scaffold00026	---NA---	144	0			0	-
g10183	scaffold00026	---NA---	190	0			0	-
g10184	scaffold00026	denn domain-containing protein	1128	10	0.0	83.3%	0	-
g10185	scaffold00026	related to type 1 phosphatases regulator ypi-1	197	10	6.20701e-25	57.5%	1	C:nucleus	-
g10186	scaffold00026	---NA---	97	0			0	-
g10187	scaffold00026	hypothetical protein AOQ84DRAFT_386279	651	10	6.57366e-72	47.7%	0	-
g10188	scaffold00026	c2h2 type zinc finger domain protein	1011	10	1.26974e-66	46.5%	1	F:metal ion binding
g10189	scaffold00026	pathogenesis associated protein pep2	243	10	1.93763e-156	84.1%	0	-
g1019	scaffold00002	dna repair helicase	863	10	0.0	79.9%	5	F:DNA binding; P:DNA duplex unwinding; F:ATP-dependent DNA helicase activity; F:ATP binding; C:nucleus	-
g10190	scaffold00026	---NA---	173	0			0	-
g10191	scaffold00026	hypothetical protein PFICI_11840	370	2	3.70874e-22	57.0%	0	-
g10192	scaffold00026	2-chloromaleylacetate maleylacetate reductase	638	4	6.54306e-07	57.25%	3	P:oxidation-reduction process; F:maleylacetate reductase activity; F:oxidoreductase activity
g10193	scaffold00026	shikimate quinate 5- protein	306	10	0.0	82.3%	2	F:shikimate 3-dehydrogenase (NADP+) activity; P:oxidation-reduction process	EC:1.1.1.25; EC:1.1.1.282
g10194	scaffold00026	maleylacetate reductase	357	10	0.0	83.0%	3	F:metal ion binding; F:maleylacetate reductase activity; P:oxidation-reduction process	EC:1.3.1.32
g10195	scaffold00026	conserved hypothetical protein	331	3	7.81469e-21	52.0%	0	-
g10196	scaffold00026	cathecol -dioxygenase	331	10	0.0	83.4%	4	F:catechol 1,2-dioxygenase activity; F:ferric iron binding; P:catechol-containing compound metabolic process; P:oxidation-reduction process	EC:1.13.11.1
g10197	scaffold00026	pentafunctional arom polypeptide	294	10	3.02123e-171	76.8%	9	F:3-dehydroquinate dehydratase activity; F:shikimate kinase activity; P:oxidation-reduction process; F:3-phosphoshikimate 1-carboxyvinyltransferase activity; F:ATP binding; F:shikimate 3-dehydrogenase (NADP+) activity; F:3-dehydroquinate synthase activity; C:cytoplasm; P:aromatic amino acid family biosynthetic process	EC:2.5.1.19; EC:1.1.1.25; EC:4.2.1.10; EC:4.2.3.4; EC:2.7.1.71; EC:1.1.1.282
g10198	scaffold00026	zn2 cys6 dna-binding protein	790	10	0.0	48.0%	1	F:binding	-
g10199	scaffold00026	quinate pathway repressor protein	933	10	0.0	65.2%	3	F:3-dehydroquinate dehydratase activity; F:shikimate 3-dehydrogenase (NADP+) activity; P:oxidation-reduction process	EC:1.1.1.25; EC:4.2.1.10; EC:1.1.1.282
g102	scaffold00001	glycosyltransferase family 31 protein	879	10	2.40805e-122	64.2%	0	-
g1020	scaffold00002	hypothetical protein VM1G_12080	581	1	0.138414	62.0%	0	-
g10200	scaffold00026	---NA---	108	0			0	-
g10201	scaffold00026	pentalenene synthase	354	10	4.45819e-138	59.3%	2	F:magnesium ion binding; F:terpene synthase activity	-
g10202	scaffold00026	---NA---	220	0			0	-
g10203	scaffold00026	gnat domain-domain-containing protein	287	10	1.0955e-104	61.3%	0	-
g10204	scaffold00026	zinc finger transcription factor ace1	399	10	0.101748	53.2%	2	F:metal ion binding; F:nucleic acid binding
g10205	scaffold00026	3-dehydroshikimate dehydratase	671	10	0.0	84.8%	2	F:oxidoreductase activity, acting on single donors with incorporation of molecular oxygen, incorporation of two atoms of oxygen; F:lyase activity	EC:1.13.11
g10206	scaffold00026	hypothetical protein BN1723_003821	240	4	3.05663e-26	54.75%	0	-
g10207	scaffold00026	5-oxoprolinase (atp-hydrolysing)	1266	10	0.0	81.4%	2	P:metabolic process; F:hydrolase activity	-
g10208	scaffold00026	alpha beta hydrolase fold protein	1731	10	0.0	63.3%	0	-
g10209	scaffold00026	major facilitator superfamily transporter	523	10	0.0	81.5%	3	P:transmembrane transport; C:integral to membrane; F:transporter activity	-
g1021	scaffold00002	protein phosphatase 2c	556	10	0.0	60.1%	2	F:catalytic activity; P:metabolic process	-
g10210	scaffold00026	---NA---	224	0			0	-
g10211	scaffold00026	cytochrome c c1 heme lyase	451	10	9.94986e-163	66.5%	2	F:holocytochrome-c synthase activity; C:mitochondrion	EC:4.4.1.17
g10212	scaffold00026	amino acid permease	943	10	0.0	87.1%	3	C:integral to membrane; F:amino acid transmembrane transporter activity; P:amino acid transmembrane transport	-
g10213	scaffold00026	hypothetical protein V492_01496	593	3	5.4324e-14	49.33%	0	-
g10214	scaffold00026	mg2+ transporter -like zinc transport protein	77	10	2.61772e-22	83.2%	0	-
g10215	scaffold00026	hypothetical protein PFICI_08658	1160	10	0.0	54.9%	0	-
g10216	scaffold00026	high-affinity glucose	546	10	0.0	67.1%	2	P:metabolic process; F:sulfuric ester hydrolase activity	-
g10217	scaffold00026	---NA---	542	0			0	-
g10218	scaffold00026	---NA---	518	0			0	-
g10219	scaffold00026	endonuclease exonuclease phosphatase family protein	517	10	0.0	86.9%	0	-
g1022	scaffold00002	---NA---	240	0			0	-
g10220	scaffold00026	domain-containing protein	1199	10	0.0	76.0%	0	-
g10221	scaffold00026	---NA---	220	0			0	-
g10222	scaffold00026	hypothetical protein V502_03370	552	4	1.0976e-43	49.25%	0	-
g10223	scaffold00026	major facilitator superfamily transporter	515	10	0.0	81.7%	2	P:transmembrane transport; C:integral to membrane	-
g10224	scaffold00026	YBL03.19	525	4	1.30156e-05	55.75%	0	-
g10225	scaffold00026	acetyl- hydrolase	536	10	0.0	93.8%	2	P:acetyl-CoA metabolic process; F:catalytic activity	-
g10226	scaffold00026	hypothetical protein PFICI_08652	583	10	0.0	71.8%	0	-
g10227	scaffold00026	---NA---	399	0			0	-
g10228	scaffold00026	hypothetical protein PFICI_08651	511	10	0.0	56.1%	0	-
g10229	scaffold00026	---NA---	421	0			0	-
g1023	scaffold00002	antibiotic biosynthesis monooxygenase protein	221	10	2.63421e-132	54.3%	0	-
g10230	scaffold00026	bromodomain-containing factor 1 protein	151	10	3.98801e-59	75.5%	0	-
g10231	scaffold00026	bromodomain-containing factor 1 protein	726	10	0.0	57.6%	0	-
g10232	scaffold00026	related to utp5 protein	384	10	0.0	70.7%	0	-
g10233	scaffold00026	---NA---	97	0			0	-
g10234	scaffold00026	probable dna-dependent atpase mgs1	557	10	0.0	82.1%	2	F:nucleoside-triphosphatase activity; F:ATP binding	EC:3.6.1.15
g10235	scaffold00026	---NA---	136	0			0	-
g10236	scaffold00026	glucose-regulated protein	576	10	5.27239e-73	52.0%	2	F:ATP binding; P:response to stress	-
g10237	scaffold00026	accumulation-associated protein	1347	10	0.0	61.8%	0	-
g10238	scaffold00026	abc-2 type transporter	1893	10	0.0	88.6%	0	-
g10239	scaffold00026	c6 transcription factor	619	10	0.0	59.9%	6	P:regulation of transcription from RNA polymerase II promoter; F:zinc ion binding; F:sequence-specific DNA binding RNA polymerase II transcription factor activity; F:DNA binding; C:nucleus; P:transcription from RNA polymerase II promoter	-
g1024	scaffold00002	spindle poison sensitivity protein	483	10	0.0	71.5%	1	F:metal ion binding	-
g10240	scaffold00026	hypothetical protein PFICI_08642	648	10	0.0	77.9%	0	-
g10241	scaffold00026	aromatic aminotransferase aro8	850	10	0.0	73.5%	3	F:pyridoxal phosphate binding; P:biosynthetic process; F:transaminase activity	-
g10242	scaffold00026	major facilitator superfamily transporter	522	10	0.0	81.9%	2	P:transmembrane transport; C:integral to membrane	-
g10243	scaffold00026	---NA---	164	0			0	-
g10244	scaffold00026	alpha beta-hydrolase	1047	10	0.0	76.1%	0	-
g10245	scaffold00026	---NA---	472	0			0	-
g10246	scaffold00026	cellobiose dehydrogenase	817	10	0.0	79.6%	0	-
g10247	scaffold00026	---NA---	72	0			0	-
g10248	scaffold00026	hypothetical protein PFICI_08635	826	10	0.0	58.2%	0	-
g10249	scaffold00026	---NA---	207	0			0	-
g1025	scaffold00002	---NA---	255	0			0	-
g10250	scaffold00026	mitochondrial external nadh dehydrogenase protein	423	10	0.0	87.5%	0	-
g10251	scaffold00026	choline transport protein	517	10	0.0	74.2%	3	C:integral to membrane; F:amino acid transmembrane transporter activity; P:amino acid transmembrane transport	-
g10252	scaffold00026	---NA---	933	0			0	-
g10253	scaffold00026	hypothetical protein PFICI_08631	600	1	7.20111e-62	69.0%	0	-
g10254	scaffold00026	iron sulfur assembly protein 1 protein	240	10	6.51379e-162	72.5%	3	F:structural molecule activity; P:iron-sulfur cluster assembly; F:iron-sulfur cluster binding	-
g10255	scaffold00026	duf1741 domain containing protein	641	10	0.0	84.6%	0	-
g10256	scaffold00026	---NA---	495	0			0	-
g10257	scaffold00026	serine-rich protein	472	10	1.31786e-158	67.7%	0	-
g10258	scaffold00026	---NA---	379	0			0	-
g10259	scaffold00026	hypothetical protein PFICI_08627	727	10	0.0	60.6%	0	-
g1026	scaffold00002	asparagine synthase	714	10	0.0	69.6%	0	-
g10260	scaffold00026	atp-dependent rna helicase dhx8	666	10	0.0	89.5%	3	F:nucleic acid binding; F:ATP binding; F:ATP-dependent helicase activity	-
g10261	scaffold00026	uncharacterised protein	209	9	0.0429866	48.67%	0	-
g10262	scaffold00026	mitotic-spindle organizing protein 1	332	10	1.38285e-24	85.0%	0	-
g10263	scaffold00026	cue domain-containing protein	428	10	0.0	74.3%	0	-
g10264	scaffold00026	---NA---	242	0			0	-
g10265	scaffold00026	kinetochore protein spc-25	258	10	1.04893e-175	87.8%	4	P:mitosis; C:nucleus; C:condensed chromosome kinetochore; P:cell division	-
g10266	scaffold00026	duf1000 domain containing protein	1030	10	0.0	49.7%	0	-
g10267	scaffold00026	60s ribosomal protein l3	226	10	3.00358e-112	84.7%	0	-
g10268	scaffold00026	coiled-coil domain-containing protein 25	1132	10	3.09671e-117	75.3%	0	-
g10269	scaffold00026	---NA---	154	0			0	-
g1027	scaffold00002	nucleic acid- ob-fold protein	760	1	11.8076	43.0%	0	-
g10270	scaffold00026	50s ribosomal protein l3	356	10	0.0	81.0%	3	C:ribosome; F:structural constituent of ribosome; P:translation	-
g10271	scaffold00026	---NA---	186	0			0	-
g10272	scaffold00026	hypothetical protein PFICI_08617	235	10	1.42755e-114	60.6%	0	-
g10273	scaffold00026	ankyrin repeat protein nuc-2	1307	10	0.0	89.1%	0	-
g10274	scaffold00026	---NA---	170	0			0	-
g10275	scaffold00026	chy zinc finger	671	10	0.0	61.0%	0	-
g10276	scaffold00026	duf1763-domain-containing protein	130	10	4.98316e-62	70.5%	0	-
g10277	scaffold00026	hypothetical protein NECHADRAFT_82103	506	10	1.52959e-79	44.9%	3	F:molecular_function; P:biological_process; C:cellular_component
g10278	scaffold00026	---NA---	90	0			0	-
g10279	scaffold00026	aaa family atpase	912	10	0.0	56.6%	2	F:nucleoside-triphosphatase activity; F:ATP binding	EC:3.6.1.15
g1028	scaffold00002	tetratricopeptide tpr repeat protein	250	10	9.59168e-122	58.1%	0	-
g10280	scaffold00026	---NA---	85	0			0	-
g10281	scaffold00026	mitochondrial carrier protein	380	10	0.0	81.5%	2	P:transport; C:integral to membrane	-
g10282	scaffold00026	---NA---	286	0			0	-
g10283	scaffold00026	maintenance of ploidy protein mob1	240	10	2.2256e-154	88.7%	2	F:kinase activity; P:phosphorylation	-
g10284	scaffold00026	six-hairpin glycosidase-like protein	696	10	0.0	75.2%	0	-
g10285	scaffold00026	---NA---	262	0			0	-
g10286	scaffold00026	---NA---	136	0			0	-
g10287	scaffold00026	small nuclear ribonucleoprotein partial	186	10	3.61108e-93	78.6%	0	-
g10288	scaffold00026	hypothetical protein PFICI_08607	649	10	0.0	52.2%	0	-
g10289	scaffold00026	---NA---	98	0			0	-
g1029	scaffold00002	peptide-n4-(n-acetyl-beta-glucosaminyl)asparagine amidase a	661	10	0.0	83.7%	0	-
g10290	scaffold00026	---NA---	188	0			0	-
g10291	scaffold00026	cytochrome c	164	10	4.25951e-64	96.0%	0	-
g10292	scaffold00026	cytochrome c	164	4	0.000302921	60.0%	0	-
g10293	scaffold00026	major facilitator superfamily protein	332	10	3.03267e-160	65.2%	0	-
g10294	scaffold00026	exosome complex component rrp42	633	10	0.0	76.7%	0	-
g10295	scaffold00026	---NA---	294	0			0	-
g10296	scaffold00026	---NA---	465	0			0	-
g10297	scaffold00026	short-chain dehydrogenase reductase family protein	350	10	3.69072e-153	62.4%	0	-
g10298	scaffold00026	arginine-trna-protein transferase 1	437	10	0.0	66.3%	2	P:protein arginylation; F:arginyltransferase activity	EC:2.3.2.8
g10299	scaffold00026	nudix family protein	163	10	4.36057e-84	84.0%	0	-
g103	scaffold00001	domain-containing protein	299	10	4.13309e-166	77.0%	0	-
g1030	scaffold00002	duf367 domain-containing protein	983	10	0.0	78.8%	3	C:cytoplasm; P:rRNA processing; C:nucleus	-
g10300	scaffold00026	related to nuclear vcp-like protein	1196	10	0.0	71.1%	2	F:nucleoside-triphosphatase activity; F:ATP binding	EC:3.6.1.15
g10301	scaffold00026	37s ribosomal protein rsm22 protein	559	10	0.0	65.1%	0	-
g10302	scaffold00026	---NA---	163	0			0	-
g10303	scaffold00026	snf7 family protein	205	10	1.07169e-116	82.8%	0	-
g10304	scaffold00026	---NA---	257	0			0	-
g10305	scaffold00026	hypothetical protein PFICI_08596	855	10	0.0	56.5%	0	-
g10306	scaffold00026	atp synthase subunit 5	396	10	3.63622e-115	84.9%	0	-
g10307	scaffold00026	hypothetical protein VP1G_11342	301	3	5.37811e-07	62.0%	0	-
g10308	scaffold00026	domain-containing protein	879	10	0.0	70.8%	0	-
g10309	scaffold00026	---NA---	434	0			0	-
g1031	scaffold00002	---NA---	364	0			0	-
g10310	scaffold00026	integral membrane protein	400	10	0.0	67.5%	0	-
g10311	scaffold00026	---NA---	263	0			0	-
g10312	scaffold00026	hypothetical protein	495	1	2.99614	43.0%	0	-
g10313	scaffold00026	family 63 glycoside hydrolase	1035	10	0.0	90.2%	0	-
g10314	scaffold00026	hypothetical protein VM1G_09282	493	3	1.04626e-52	64.67%	0	-
g10315	scaffold00026	duf726-domain-containing protein	1081	10	0.0	58.0%	0	-
g10316	scaffold00026	---NA---	250	0			0	-
g10317	scaffold00026	related to a-agglutinin core protein aga1	217	10	2.80537e-81	61.9%	1	P:regulation of translational fidelity	-
g10318	scaffold00026	vesicular-fusion protein sec17	656	10	0.0	85.7%	0	-
g10319	scaffold00026	hypothetical protein PFICI_09396	678	1	2.36419e-108	55.0%	0	-
g1032	scaffold00002	---NA---	525	0			0	-
g10320	scaffold00026	---NA---	73	0			0	-
g10321	scaffold00026	ribosomal rna-processing protein 12	1272	10	0.0	83.5%	0	-
g10322	scaffold00026	vesicle transport v-snare protein	1286	10	1.19264e-121	87.9%	0	-
g10323	scaffold00026	---NA---	103	0			0	-
g10324	scaffold00026	amine oxidase	1098	10	0.0	79.0%	1	F:copper ion binding	-
g10325	scaffold00026	---NA---	729	0			0	-
g10326	scaffold00026	von willebrand factor	355	10	8.2524e-126	56.6%	0	-
g10327	scaffold00026	---NA---	625	0			0	-
g10328	scaffold00026	hypothetical protein PFICI_09407	697	10	0.0	52.9%	0	-
g10329	scaffold00026	outer membrane autotransporter protein	980	10	0.0	71.6%	0	-
g1033	scaffold00002	vhs domain-containing protein	1147	10	0.0	85.1%	3	C:clathrin adaptor complex; P:vesicle-mediated transport; P:intracellular protein transport	-
g10330	scaffold00026	cc1-like family splicing factor	1130	10	0.0	83.6%	0	-
g10331	scaffold00026	exportin-1	1080	10	0.0	91.5%	0	-
g10332	scaffold00026	---NA---	902	0			0	-
g10333	scaffold00026	alanine-glyoxylate aminotransferase	385	10	0.0	91.7%	3	P:metabolic process; F:pyridoxal phosphate binding; F:transaminase activity	-
g10334	scaffold00026	---NA---	272	0			0	-
g10335	scaffold00026	shugoshin c terminal domain-containing protein	961	10	0.0	57.4%	4	C:chromosome, centromeric region; P:meiotic chromosome segregation; C:nucleus; P:cell division	-
g10336	scaffold00026	mj0936 family phosphodiesterase	206	10	1.08025e-142	92.5%	1	F:hydrolase activity, acting on ester bonds	-
g10337	scaffold00026	dash complex subunit dad2	152	10	6.22478e-80	80.9%	3	C:mitotic spindle; C:DASH complex; P:mitotic spindle organization in nucleus	-
g10338	scaffold00026	carboxylesterase family protein	696	10	0.0	56.3%	0	-
g10339	scaffold00026	phenmedipham hydrolase protein	710	10	0.0	63.4%	1	F:hydrolase activity	-
g1034	scaffold00002	translation initiation factor if-2	1637	10	0.0	73.9%	6	F:translation initiation factor activity; P:translational initiation; C:intracellular; P:GTP catabolic process; F:GTPase activity; F:GTP binding	-
g10340	scaffold00026	---NA---	491	0			0	-
g10341	scaffold00026	---NA---	243	0			0	-
g10342	scaffold00026	tpa inducible protein	790	10	0.0	59.9%	2	P:DNA-dependent transcription, initiation; C:transcription factor TFIID complex	-
g10343	scaffold00026	endoribonuclease ysh1	835	10	0.0	87.0%	8	P:mRNA cleavage; P:termination of RNA polymerase II transcription; F:metal ion binding; P:mRNA polyadenylation; F:endoribonuclease activity; P:snoRNA splicing; P:snoRNA 3'-end processing; C:mRNA cleavage and polyadenylation specificity factor complex	-
g10344	scaffold00026	von willebrand factor	1252	10	3.10845e-157	46.3%	0	-
g10345	scaffold00026	---NA---	245	0			0	-
g10346	scaffold00026	hypothetical protein PFICI_09421	248	1	2.45537e-71	73.0%	0	-
g10347	scaffold00026	---NA---	173	0			0	-
g10348	scaffold00026	flocculation suppression protein	579	10	0.0	75.2%	4	F:sequence-specific DNA binding transcription factor activity; F:sequence-specific DNA binding; C:nucleus; P:regulation of transcription, DNA-dependent	-
g10349	scaffold00026	wd repeat-containing protein	771	10	0.0	78.3%	0	-
g1035	scaffold00002	hypothetical protein PFICI_03968	343	10	0.0	74.7%	0	-
g10350	scaffold00026	minichromosome loss protein 1 protein	848	10	0.0	84.9%	0	-
g10351	scaffold00026	---NA---	103	0			0	-
g10352	scaffold00026	gastric mucin-like protein	1082	10	0.0	52.4%	0	-
g10353	scaffold00026	carnitine acetyl transferase	846	10	0.0	85.6%	0	-
g10354	scaffold00026	---NA---	504	0			0	-
g10355	scaffold00026	hypothetical protein PFICI_08924	340	10	0.0	60.9%	0	-
g10356	scaffold00026	---NA---	156	0			0	-
g10357	scaffold00026	hypothetical protein PFICI_08923	620	10	0.0	74.9%	0	-
g10358	scaffold00026	---NA---	475	0			0	-
g10359	scaffold00026	related to o-methyltransferase	502	10	0.0	64.6%	0	-
g1036	scaffold00002	---NA---	185	0			0	-
g10360	scaffold00026	autophagy protein apg9	250	2	2.22729e-14	67.0%	0	-
g10361	scaffold00026	gtp-binding protein ypt1	298	10	1.59509e-141	94.9%	3	F:GTP binding; P:small GTPase mediated signal transduction; P:protein transport	-
g10362	scaffold00026	dna-directed rna polymerase iii 130 kda polypeptide protein	630	10	4.91661e-162	69.9%	0	-
g10363	scaffold00026	---NA---	237	0			0	-
g10364	scaffold00026	dna repair protein rad57	464	10	0.0	76.3%	0	-
g10365	scaffold00026	dna-directed rna polymerase iii subunit rpc2	1640	10	0.0	90.3%	4	F:DNA-directed RNA polymerase activity; P:transcription, DNA-dependent; F:DNA binding; F:ribonucleoside binding	EC:2.7.7.6
g10366	scaffold00026	duf1620 domain-containing protein	484	10	3.316e-169	55.9%	0	-
g10367	scaffold00026	---NA---	769	0			0	-
g10368	scaffold00026	pumilio domain-containing protein	231	10	3.689e-136	75.6%	0	-
g10369	scaffold00026	pumilio domain-containing protein	764	10	0.0	70.5%	0	-
g1037	scaffold00002	---NA---	265	0			0	-
g10370	scaffold00026	---NA---	385	0			0	-
g10371	scaffold00026	large subunit ribosomal protein l15e	210	10	2.00926e-25	56.7%	0	-
g10372	scaffold00026	ribosomal l15	203	10	4.27309e-140	98.7%	4	C:ribosome; P:mycelium development; F:structural constituent of ribosome; P:translation	-
g10373	scaffold00026	hypothetical protein PFICI_08914	268	4	6.11909e-82	50.25%	0	-
g10374	scaffold00026	uncharacterized threonine-rich gpi-anchored glyco	226	2	1.96664e-24	55.0%	0	-
g10375	scaffold00026	c6 transcription	429	10	9.57519e-172	59.6%	0	-
g10376	scaffold00026	c6 and c2h2 transcription factor	941	10	0.0	52.5%	0	-
g10377	scaffold00026	zinc-binding oxidoreductase	341	10	0.0	71.2%	3	F:zinc ion binding; F:oxidoreductase activity; P:oxidation-reduction process	-
g10378	scaffold00026	---NA---	521	0			0	-
g10379	scaffold00026	hypothetical protein UCREL1_3468	168	1	5.46837e-23	59.0%	0	-
g1038	scaffold00002	phosphonate transport system substrate-binding protein	247	10	1.98278e-129	66.1%	0	-
g10380	scaffold00026	uncharacterised protein	400	5	9.4315e-23	65.0%	0	-
g10381	scaffold00026	urease accessory protein	271	10	0.0	93.9%	0	-
g10382	scaffold00027	---NA---	147	0			0	-
g10383	scaffold00027	c2h2 finger domain-containing protein	1055	10	0.0	55.1%	0	-
g10384	scaffold00027	---NA---	226	0			0	-
g10385	scaffold00027	---NA---	148	0			0	-
g10386	scaffold00027	carbohydrate-binding module family 48 protein	118	10	4.93638e-18	78.2%	0	-
g10387	scaffold00027	carbohydrate-binding module family 48 protein	512	10	0.0	61.3%	1	P:signal transduction	-
g10388	scaffold00027	---NA---	769	0			0	-
g10389	scaffold00027	hydrogen voltage-gated channel 1 protein	260	10	1.16355e-101	65.5%	0	-
g1039	scaffold00002	hypothetical protein PFICI_03975	843	1	72.1703	45.0%	0	-
g10390	scaffold00027	phospholipase d1 protein	182	10	1.00786e-46	59.2%	0	-
g10391	scaffold00027	---NA---	78	0			0	-
g10392	scaffold00027	mitochondrial nadh-ubiquinone oxidoreductase 20 kd subunit	221	10	8.88574e-156	93.4%	5	F:metal ion binding; F:4 iron, 4 sulfur cluster binding; P:oxidation-reduction process; F:quinone binding; F:NADH dehydrogenase (ubiquinone) activity	EC:1.6.5.3
g10393	scaffold00027	---NA---	411	0			0	-
g10394	scaffold00027	fucose permease	955	10	0.0	74.1%	0	-
g10395	scaffold00027	vacuolar basic amino acid transporter 1	604	10	0.0	71.3%	3	P:transmembrane transport; C:integral to membrane; F:transporter activity	-
g10396	scaffold00027	---NA---	569	0			0	-
g10397	scaffold00027	glycoside hydrolase family 2 protein	630	10	0.0	77.0%	2	P:carbohydrate metabolic process; F:hydrolase activity, hydrolyzing O-glycosyl compounds	-
g10398	scaffold00027	hypothetical protein UV8b_4987	260	1	1.37194e-09	71.0%	0	-
g10399	scaffold00027	ring-15 protein	655	10	0.0	75.1%	1	F:zinc ion binding	-
g104	scaffold00001	---NA---	179	0			0	-
g1040	scaffold00002	---NA---	253	0			0	-
g10400	scaffold00027	gdsl-like lipase acylhydrolase protein	249	10	3.00746e-155	72.1%	0	-
g10401	scaffold00027	---NA---	422	0			0	-
g10402	scaffold00027	related to nadph oxidase homolog 1	725	10	0.0	75.3%	4	F:oxidoreductase activity; P:oxidation-reduction process; C:integral to membrane; F:calcium ion binding	-
g10403	scaffold00027	hypothetical protein CH063_12459	543	1	0.397489	76.0%	0	-
g10404	scaffold00027	glutathione s-transferase domain-containing protein	236	10	2.22717e-132	76.4%	1	F:transferase activity	-
g10405	scaffold00027	carotenoid cleavage dioxygenase 1	588	10	0.0	68.3%	1	F:oxidoreductase activity, acting on single donors with incorporation of molecular oxygen, incorporation of two atoms of oxygen	EC:1.13.11
g10406	scaffold00027	---NA---	503	0			0	-
g10407	scaffold00027	cytochrome p450 3a17	511	10	0.0	70.2%	0	-
g10408	scaffold00027	---NA---	120	0			0	-
g10409	scaffold00027	hypothetical protein PFICI_07067	275	5	1.32032e-119	60.4%	0	-
g1041	scaffold00002	condensin complex component cnd1	1265	10	0.0	86.0%	0	-
g10410	scaffold00027	---NA---	376	0			0	-
g10411	scaffold00027	extracellular dioxygenase	376	10	0.0	88.4%	0	-
g10412	scaffold00027	hypothetical protein PFICI_07068	198	8	2.5765e-61	52.75%	0	-
g10413	scaffold00027	---NA---	295	0			0	-
g10414	scaffold00027	hypothetical protein PFICI_07070	263	1	8.20904e-30	75.0%	0	-
g10415	scaffold00027	---NA---	415	0			0	-
g10416	scaffold00027	---NA---	126	0			0	-
g10417	scaffold00027	nad -binding protein	351	10	5.79879e-127	68.9%	3	P:cellular metabolic process; F:coenzyme binding; F:catalytic activity	-
g10418	scaffold00027	ankyrin unc44	577	10	0.0	50.4%	0	-
g10419	scaffold00027	---NA---	249	0			0	-
g1042	scaffold00002	---NA---	227	0			0	-
g10420	scaffold00027	cytochrome p450	524	10	0.0	68.9%	5	F:heme binding; F:oxidoreductase activity, acting on paired donors, with incorporation or reduction of molecular oxygen; F:iron ion binding; F:electron carrier activity; P:oxidation-reduction process	-
g10421	scaffold00027	---NA---	238	0			0	-
g10422	scaffold00027	fad-binding domain-containing protein	496	10	1.43481e-172	66.5%	3	F:flavin adenine dinucleotide binding; F:UDP-N-acetylmuramate dehydrogenase activity; P:oxidation-reduction process	EC:1.1.1.158
g10423	scaffold00027	---NA---	166	0			0	-
g10424	scaffold00027	aldo keto reductase	329	10	1.92907e-158	72.7%	0	-
g10425	scaffold00027	---NA---	264	0			0	-
g10426	scaffold00027	trichodiene partial	541	10	0.0	71.0%	0	-
g10427	scaffold00027	---NA---	359	0			0	-
g10428	scaffold00027	beta-ketoacyl synthase	2866	10	0.0	70.7%	0	-
g10429	scaffold00027	uncharacterised protein	784	10	0.102099	40.7%	0	-
g1043	scaffold00002	---NA---	352	0			0	-
g10430	scaffold00027	abc transporter	2232	10	0.0	61.0%	0	-
g10431	scaffold00027	serine-type carboxypeptidase protein	495	10	0.0	74.1%	2	F:serine-type carboxypeptidase activity; P:proteolysis	EC:3.4.16
g10432	scaffold00027	fumonisin biosynthetic transcription factor	678	10	2.39444e-125	47.1%	0	-
g10433	scaffold00027	hypothetical protein PFICI_12305	233	10	3.15846e-137	57.1%	0	-
g10434	scaffold00027	sucrose transporter	804	10	0.0	46.8%	0	-
g10435	scaffold00027	hypothetical protein PFICI_12303	312	10	0.0	58.9%	0	-
g10436	scaffold00027	related to hard surface induced protein 3	486	10	0.0	54.7%	1	F:transferase activity, transferring acyl groups	-
g10437	scaffold00027	hypothetical protein PFICI_12299	485	10	1.18829e-159	56.8%	0	-
g10438	scaffold00027	zinc metalloproteinase c	184	10	5.84228e-56	55.2%	0	-
g10439	scaffold00027	hypothetical protein PFICI_12298	200	10	1.88145e-132	54.0%	0	-
g1044	scaffold00002	cell cycle protein	502	10	0.0	78.4%	0	-
g10440	scaffold00027	hypothetical protein PFICI_12297	204	10	2.90534e-132	56.6%	0	-
g10441	scaffold00027	---NA---	142	0			0	-
g10442	scaffold00027	hypothetical protein PFICI_12296	350	10	6.58048e-113	53.1%	0	-
g10443	scaffold00027	SesB	539	10	7.84018e-134	74.5%	0	-
g10444	scaffold00027	---NA---	130	0			0	-
g10445	scaffold00027	related to triacylglycerol lipase ii precursor	539	10	0.0	70.6%	0	-
g10446	scaffold00027	---NA---	259	0			0	-
g10447	scaffold00027	short-chain dehydrogenase	341	10	1.5956e-156	76.7%	2	P:oxidation-reduction process; F:oxidoreductase activity	-
g10448	scaffold00027	uncharacterized protein FFUJ_06842	87	10	2.84262e-25	74.9%	0	-
g10449	scaffold00027	hypothetical protein PENARI_c002G03790	167	10	1.02151e-27	63.2%	0	-
g1045	scaffold00002	hypothetical protein PFICI_03978	543	10	0.0	69.9%	0	-
g10450	scaffold00027	---NA---	106	0			0	-
g10451	scaffold00027	cytochrome p450	913	10	0.0	87.0%	0	-
g10452	scaffold00027	related to ankyrin	615	10	0.0	46.4%	0	-
g10453	scaffold00027	hypothetical protein PFICI_14022	194	2	3.78837e-09	47.0%	0	-
g10454	scaffold00027	---NA---	293	0			0	-
g10455	scaffold00027	hypothetical protein NEUTE1DRAFT_147672	721	10	4.38608e-25	45.2%	0	-
g10456	scaffold00027	hypothetical protein FAVG1_08886	339	10	1.10296e-19	42.4%	0	-
g10457	scaffold00027	fibronectin type iii domain protein	1007	10	3.22152e-164	66.8%	1	F:hydrolase activity	-
g10458	scaffold00027	---NA---	168	0			0	-
g10459	scaffold00027	---NA---	145	0			0	-
g1046	scaffold00002	---NA---	274	0			0	-
g10460	scaffold00027	alpha beta superfamily hydrolase	346	10	4.33411e-67	70.6%	1	F:hydrolase activity	-
g10461	scaffold00027	alcohol oxidase	660	10	0.0	67.2%	0	-
g10462	scaffold00027	multicopper oxidase	649	10	0.0	78.7%	3	F:oxidoreductase activity; P:oxidation-reduction process; F:copper ion binding	-
g10463	scaffold00027	hypothetical protein PFICI_07085	417	10	2.7109e-112	70.1%	0	-
g10464	scaffold00027	---NA---	239	0			0	-
g10465	scaffold00027	subfamily a member mitochondrial	1166	10	5.13318e-157	62.0%	0	-
g10466	scaffold00027	mitochondrial outer membrane protein porin	561	10	0.0	77.4%	2	C:mitochondrial outer membrane; P:transmembrane transport	-
g10467	scaffold00027	asparagine synthase	581	10	0.0	91.9%	3	P:L-asparagine biosynthetic process; F:asparagine synthase (glutamine-hydrolyzing) activity; F:ATP binding	EC:6.3.5.4
g10468	scaffold00027	sumo conjugating enzyme	156	10	3.74649e-107	94.0%	1	F:SUMO ligase activity	-
g10469	scaffold00027	amine oxidase	449	10	0.0	73.9%	0	-
g1047	scaffold00002	activating signal cointegrator 1 complex subunit 3	153	10	1.36048e-14	71.2%	0	-
g10470	scaffold00027	---NA---	682	0			0	-
g10471	scaffold00027	pali-domain-containing protein	240	10	9.37952e-88	50.4%	0	-
g10472	scaffold00027	swi snf family dna-dependent atpase	1195	10	0.0	55.0%	0	-
g10473	scaffold00027	---NA---	148	0			0	-
g10474	scaffold00027	predicted protein	131	1	1.13434	61.0%	0	-
g10475	scaffold00027	glycoside hydrolase family 5 protein	673	10	0.0	67.7%	0	-
g10476	scaffold00027	---NA---	312	0			0	-
g10477	scaffold00027	hypothetical protein TERG_11965	544	1	4.90382e-62	61.0%	0	-
g10478	scaffold00027	gmc oxidoreductase	551	10	0.0	91.6%	4	F:flavin adenine dinucleotide binding; F:choline dehydrogenase activity; P:oxidation-reduction process; P:alcohol metabolic process	EC:1.1.99.1
g10479	scaffold00027	betaine aldehyde dehydrogenase	500	10	0.0	91.8%	0	-
g1048	scaffold00002	fad dependent oxidoreductase	806	10	0.0	68.4%	0	-
g10480	scaffold00027	phosphomethylpyrimidine synthase	568	9	4.74513e-17	46.11%	8	F:metal ion binding; P:DNA replication; P:DNA metabolic process; F:ligase activity; P:response to DNA damage stimulus; P:DNA repair; F:DNA ligase (NAD+) activity; F:DNA binding
g10481	scaffold00027	pre-mrna-splicing factor cwc24	168	10	3.08049e-108	86.3%	1	F:zinc ion binding	-
g10482	scaffold00027	pre-mrna splicing factor cwc24	133	10	2.85851e-42	80.5%	1	F:zinc ion binding	-
g10483	scaffold00027	anucleate primary sterigmata protein a	2386	10	0.0	70.8%	3	F:phospholipid binding; P:cortical protein anchoring; C:cell cortex	-
g10484	scaffold00027	---NA---	671	0			0	-
g10485	scaffold00027	alpha-ketoglutarate-dependent sulfonate dioxygenase protein	390	10	0.0	85.5%	2	P:oxidation-reduction process; F:oxidoreductase activity	-
g10486	scaffold00027	---NA---	371	0			0	-
g10487	scaffold00027	nb-arc and ankyrin domain partial	508	10	4.37643e-144	65.6%	2	F:catalytic activity; P:nucleoside metabolic process	-
g10488	scaffold00027	ankyrin repeat protein	340	10	4.29143e-46	54.7%	0	-
g10489	scaffold00027	high-affinity nicotinic acid transporter	1022	10	6.73056e-125	50.5%	0	-
g1049	scaffold00002	---NA---	310	0			0	-
g10490	scaffold00027	2-isopropylmalate synthase	582	10	0.0	59.1%	0	-
g10491	scaffold00027	---NA---	158	0			0	-
g10492	scaffold00027	2-isopropylmalate synthase	277	10	3.3306e-149	66.3%	0	-
g10493	scaffold00027	2-hydroxyacid dehydrogenase	367	10	0.0	74.8%	0	-
g10494	scaffold00027	integral membrane	327	10	1.18231e-95	66.7%	0	-
g10495	scaffold00027	---NA---	66	0			0	-
g10496	scaffold00027	---NA---	305	0			0	-
g10497	scaffold00027	alpha beta hydrolase protein	333	10	0.0	91.6%	0	-
g10498	scaffold00027	hypothetical protein FOC1_g10006146	606	10	0.0	76.5%	4	P:transcription, DNA-dependent; F:DNA binding; C:nucleus; F:zinc ion binding	-
g10499	scaffold00027	set domain	346	10	0.0	75.1%	3	C:cytoplasm; P:arginine biosynthetic process; F:acetylglutamate kinase activity	EC:2.7.2.8
g105	scaffold00001	protein stn1	505	10	4.42401e-136	62.1%	0	-
g1050	scaffold00002	integral membrane protein	354	10	0.0	62.6%	0	-
g10500	scaffold00027	---NA---	121	0			0	-
g10501	scaffold00027	membrane transporter protein	490	10	0.0	72.0%	0	-
g10502	scaffold00027	hypothetical protein PFICI_12883	514	10	0.0	73.0%	3	F:molecular_function; P:biological_process; C:cellular_component
g10503	scaffold00027	---NA---	115	0			0	-
g10504	scaffold00027	---NA---	113	0			0	-
g10505	scaffold00027	predicted protein	423	3	1.14632e-49	67.0%	0	-
g10506	scaffold00027	surface protein pls	263	10	4.62522e-06	55.9%	0	-
g10507	scaffold00027	---NA---	214	0			0	-
g10508	scaffold00027	major facilitator superfamily transporter protein	692	10	0.0	77.5%	0	-
g10509	scaffold00027	polyketide synthase	253	10	1.36259e-62	60.9%	9	P:oxidation-reduction process; F:oxidoreductase activity; F:transferase activity; P:metabolic process; F:catalytic activity; F:zinc ion binding; F:transferase activity, transferring acyl groups other than amino-acyl groups; P:mitotic chromosome condensation; C:condensin complex
g1051	scaffold00002	---NA---	292	0			0	-
g10510	scaffold00027	ochratoxin a non-ribosomal peptide synthetase protein	1325	10	0.0	68.0%	0	-
g10511	scaffold00027	---NA---	954	0			0	-
g10512	scaffold00027	acid phosphatase	918	10	0.0	82.3%	2	F:metal ion binding; F:acid phosphatase activity	EC:3.1.3.2
g10513	scaffold00027	---NA---	138	0			0	-
g10514	scaffold00027	hypothetical protein PFICI_00566	128	10	5.90452e-20	57.8%	0	-
g10515	scaffold00027	lipase class 3	343	10	8.67781e-81	55.7%	2	P:lipid metabolic process; F:triglyceride lipase activity	EC:3.1.1.3
g10516	scaffold00027	---NA---	88	0			0	-
g10517	scaffold00027	protein piccolo	1125	10	0.0	84.1%	3	F:molecular_function; P:biological_process; C:cellular_component
g10518	scaffold00027	---NA---	172	0			0	-
g10519	scaffold00027	short-chain dehydrogenase reductase family	308	10	3.79288e-111	70.1%	2	P:oxidation-reduction process; F:oxidoreductase activity	-
g1052	scaffold00002	fad-dependent oxygenase	518	10	0.0	73.5%	0	-
g10520	scaffold00027	---NA---	205	0			0	-
g10521	scaffold00027	fad nad -binding protein	516	10	0.0	69.6%	0	-
g10522	scaffold00027	---NA---	193	0			0	-
g10523	scaffold00027	killer toxin subunits alpha beta protein	1221	10	0.0	69.9%	1	F:hydrolase activity	-
g10524	scaffold00027	---NA---	159	0			0	-
g10525	scaffold00027	---NA---	464	0			0	-
g10526	scaffold00027	ncs1 nucleoside transporter family protein	1084	10	0.0	82.5%	7	P:transcription, DNA-dependent; F:DNA binding; P:nucleobase transport; C:membrane; C:nucleus; F:zinc ion binding; F:nucleobase transmembrane transporter activity	-
g10527	scaffold00027	hydantoin utilization protein a 3	997	10	0.0	83.1%	1	F:hydrolase activity	-
g10528	scaffold00027	het-domain-containing protein	756	10	1.20649e-87	61.2%	0	-
g10529	scaffold00027	carboxypeptidase y protein	992	10	0.0	60.9%	0	-
g1053	scaffold00002	hypothetical protein V498_10528	126	1	51.3657	57.0%	0	-
g10530	scaffold00027	hypothetical protein PFICI_07087	175	6	7.43601e-104	55.33%	0	-
g10531	scaffold00027	mitochondrial metalloendopeptidase oma1	446	10	0.0	73.3%	0	-
g10532	scaffold00027	hypothetical protein VFPFJ_08690	201	1	10.8249	63.0%	0	-
g10533	scaffold00027	---NA---	215	0			0	-
g10534	scaffold00027	hypothetical protein MMYC01_203250	102	10	8.96215e-16	80.5%	0	-
g10535	scaffold00027	hypothetical protein BBO_01318	335	2	2.42124e-19	67.0%	0	-
g10536	scaffold00027	deoxycytidylate deaminase protein	354	10	0.0	77.0%	3	F:hydrolase activity; F:zinc ion binding; P:metabolic process	-
g10537	scaffold00027	ubiquitin-like modifier-activating enzyme atg7	779	10	0.0	85.3%	3	C:cytoplasm; F:catalytic activity; P:autophagy	-
g10538	scaffold00027	sugar transporter	593	10	0.0	80.7%	0	-
g10539	scaffold00027	---NA---	119	0			0	-
g1054	scaffold00002	polyketide synthase	1922	10	0.0	68.2%	3	P:metabolic process; F:hydrolase activity; F:transferase activity	-
g10540	scaffold00027	related to chaperone protein dnaj	449	10	0.0	79.1%	0	-
g10541	scaffold00027	hypothetical protein V498_06797	267	1	1.63301e-11	55.0%	0	-
g10542	scaffold00027	hypothetical protein ASPACDRAFT_127844	742	10	7.87292e-120	54.7%	1	P:guanosine tetraphosphate metabolic process	-
g10543	scaffold00027	---NA---	89	0			0	-
g10544	scaffold00027	salicylate hydroxylase	420	10	0.0	70.9%	2	P:oxidation-reduction process; F:oxidoreductase activity	-
g10545	scaffold00027	beta-lactamase	717	10	0.0	59.7%	0	-
g10546	scaffold00027	alpha beta hydrolase fold-3 domain containing protein	370	10	0.0	69.5%	0	-
g10547	scaffold00027	integral membrane protein	393	10	0.0	62.0%	0	-
g10548	scaffold00027	---NA---	186	0			0	-
g10549	scaffold00027	ankyrin repeat partial	1734	10	0.0	49.2%	0	-
g1055	scaffold00002	oxalate decarboxylase	2022	10	0.0	85.7%	0	-
g10550	scaffold00027	---NA---	208	0			0	-
g10551	scaffold00027	alcohol zinc-	354	10	0.0	69.1%	3	F:zinc ion binding; F:oxidoreductase activity; P:oxidation-reduction process	-
g10552	scaffold00027	inosine-uridine preferring nucleoside hydrolase	694	10	0.0	75.8%	1	F:hydrolase activity	-
g10553	scaffold00027	nucleoside transporter	454	10	0.0	70.3%	3	P:transport; C:integral to membrane; F:nucleoside transmembrane transporter activity	-
g10554	scaffold00027	dtdp-glucose -dehydratase protein	412	10	0.0	86.9%	3	F:dTDP-glucose 4,6-dehydratase activity; F:coenzyme binding; P:nucleotide-sugar metabolic process	EC:4.2.1.46
g10555	scaffold00027	arylsulfatase-like protein	614	10	0.0	74.5%	2	F:arylsulfatase activity; P:phenol-containing compound metabolic process	EC:3.1.6.1
g10556	scaffold00027	---NA---	327	0			0	-
g10557	scaffold00027	---NA---	438	0			0	-
g10558	scaffold00027	related to dha14-like major facilitator efflux transporter (mfs transporter)	570	10	0.0	80.8%	2	P:transmembrane transport; C:integral to membrane	-
g10559	scaffold00027	multidrug resistance protein	1486	10	0.0	62.3%	7	P:transmembrane transport; P:oxidation-reduction process; C:integral to membrane; F:ATPase activity, coupled to transmembrane movement of substances; P:ATP catabolic process; F:ATP binding; F:2-alkenal reductase [NAD(P)] activity	EC:1.3.1.74
g1056	scaffold00002	---NA---	300	0			0	-
g10560	scaffold00027	---NA---	102	0			0	-
g10561	scaffold00027	hypothetical protein VHEMI04413	540	10	6.8727e-134	60.1%	0	-
g10562	scaffold00027	hypothetical protein VHEMI04412	399	3	8.64651e-136	56.67%	0	-
g10563	scaffold00027	---NA---	153	0			0	-
g10564	scaffold00027	mfs-type transporter	588	10	0.0	72.6%	0	-
g10565	scaffold00027	cysteine proteinase	546	10	0.0	69.5%	0	-
g10566	scaffold00027	---NA---	111	0			0	-
g10567	scaffold00027	het domain-containing protein	606	10	4.59572e-140	55.7%	0	-
g10568	scaffold00027	hypothetical protein PFICI_13033	675	10	7.90378e-129	46.2%	3	F:molecular_function; P:biological_process; C:cellular_component
g10569	scaffold00027	duf4267 domain protein	138	10	6.2839e-46	71.7%	0	-
g1057	scaffold00002	56kda selenium binding protein	1006	10	0.0	89.8%	0	-
g10570	scaffold00027	double strand rna binding domain from dead end protein 1 domain-containing protein	163	10	7.44538e-55	83.6%	0	-
g10571	scaffold00027	benzoate 4-monooxygenase cytochrome p450 protein	375	10	0.0	64.1%	6	F:heme binding; F:oxidoreductase activity, acting on paired donors, with incorporation or reduction of molecular oxygen; F:monooxygenase activity; F:iron ion binding; F:electron carrier activity; P:oxidation-reduction process	-
g10572	scaffold00027	ankyrin repeat-containing protein	880	5	0.101267	48.4%	0	-
g10573	scaffold00027	---NA---	615	0			0	-
g10574	scaffold00027	major facilitator superfamily transporter	509	10	0.0	88.3%	0	-
g10575	scaffold00027	related to d-mandelate dehydrogenase	353	10	0.0	87.4%	0	-
g10576	scaffold00027	cytochrome b2	761	10	0.0	81.4%	0	-
g10577	scaffold00027	aryl-alcohol dehydrogenase	334	10	0.0	90.0%	0	-
g10578	scaffold00027	quinate permease	1217	10	0.0	84.7%	0	-
g10579	scaffold00027	---NA---	250	0			0	-
g1058	scaffold00002	iron transport multicopper oxidase fet3	945	10	0.0	82.7%	4	F:hydroquinone:oxygen oxidoreductase activity; F:copper ion binding; P:oxidation-reduction process; P:cellular response to iron ion starvation	EC:1.10.3.2
g10580	scaffold00027	glycosyl hydrolase	548	10	0.0	80.3%	0	-
g10581	scaffold00027	---NA---	205	0			0	-
g10582	scaffold00027	dihydrodipicolinate synthase	335	10	0.0	83.3%	2	F:lyase activity; P:metabolic process	-
g10583	scaffold00027	nonribosomal peptide synthetase	1057	10	0.0	68.4%	2	F:catalytic activity; P:metabolic process	-
g10584	scaffold00027	f-box domain protein	587	10	0.0	56.4%	0	-
g10585	scaffold00027	malate l-lactate dehydrogenase	356	10	0.0	92.0%	2	P:oxidation-reduction process; F:oxidoreductase activity	-
g10586	scaffold00027	---NA---	269	0			0	-
g10587	scaffold00027	fungal specific transcription factor domain-containing protein	709	10	0.0	67.4%	0	-
g10588	scaffold00027	---NA---	108	0			0	-
g10589	scaffold00027	general substrate transporter	515	10	0.0	77.8%	3	F:substrate-specific transmembrane transporter activity; C:integral to membrane; P:transmembrane transport	-
g1059	scaffold00002	related to high-affinity iron permease	374	10	0.0	82.6%	0	-
g10590	scaffold00027	---NA---	264	0			0	-
g10591	scaffold00027	dihydroxy-acid dehydratase	608	10	0.0	88.6%	0	-
g10592	scaffold00027	stress responsive a b barrel domain protein	632	10	6.71989e-54	88.5%	0	-
g10593	scaffold00027	hypothetical protein V493_06375	438	2	4.42494e-32	61.5%	0	-
g10594	scaffold00027	dihydroceramide delta -desaturase	392	10	0.0	84.2%	4	P:fatty acid biosynthetic process; C:integral to membrane; F:oxidoreductase activity, acting on paired donors, with incorporation or reduction of molecular oxygen; P:oxidation-reduction process	-
g10595	scaffold00027	msp domain-containing protein	277	10	8.25872e-167	75.3%	1	F:structural molecule activity	-
g10596	scaffold00027	uba ts-n domain-containing protein	307	10	0.0	78.4%	0	-
g10597	scaffold00027	---NA---	149	0			0	-
g10598	scaffold00027	60s acidic ribosomal protein p1	110	10	1.15802e-33	84.6%	3	C:ribosome; F:structural constituent of ribosome; P:translational elongation	-
g10599	scaffold00027	duf2408 domain protein	445	10	0.0	81.7%	0	-
g106	scaffold00001	---NA---	180	0			0	-
g1060	scaffold00002	ferric reductase transmembrane component 5	560	10	0.0	60.9%	3	F:oxidoreductase activity; P:oxidation-reduction process; C:integral to membrane	-
g10600	scaffold00027	dimeric alpha-beta barrel protein	122	10	9.91673e-68	77.2%	0	-
g10601	scaffold00027	benzoate 4-monooxygenase cytochrome p450 protein	644	10	0.0	65.1%	0	-
g10602	scaffold00027	hypothetical protein PFICI_13460	557	10	9.95552e-64	70.3%	0	-
g10603	scaffold00027	glutamine synthetase	356	10	0.0	88.5%	2	F:glutamate-ammonia ligase activity; P:glutamine biosynthetic process	EC:6.3.1.2
g10604	scaffold00027	uncharacterised protein	411	2	1.6922e-06	40.0%	0	-
g10605	scaffold00027	argininosuccinate synthase	416	10	0.0	91.6%	4	P:arginine biosynthetic process; F:ATP binding; F:argininosuccinate synthase activity; C:cytosol	EC:6.3.4.5
g10606	scaffold00027	het-domain-containing partial	140	10	7.09172e-41	51.5%	0	-
g10607	scaffold00027	---NA---	309	0			0	-
g10608	scaffold00027	lactamase_b domain containing protein	378	10	0.0	74.4%	1	F:hydrolase activity	-
g10609	scaffold00027	probable endo-polygalacturonase 6	348	10	0.0	71.4%	3	F:zinc ion binding; F:oxidoreductase activity; P:oxidation-reduction process	-
g1061	scaffold00002	hypothetical protein PFICI_10201	831	10	0.0	54.5%	0	-
g10610	scaffold00027	isotrichodermin c-15 hydroxylase protein	517	10	0.0	71.5%	0	-
g10611	scaffold00027	major facilitator superfamily general substrate transporter	599	10	0.0	70.9%	0	-
g10612	scaffold00027	---NA---	270	0			0	-
g10613	scaffold00027	zinc-binding dehydrogenase family protein	356	10	0.0	65.7%	0	-
g10614	scaffold00027	lovastatin nonaketide synthase	4044	10	0.0	58.1%	0	-
g10615	scaffold00028	---NA---	94	0			0	-
g10616	scaffold00028	---NA---	537	0			0	-
g10617	scaffold00028	class v protein	183	3	5.28283e-64	56.33%	0	-
g10618	scaffold00028	hypothetical protein PFICI_04001	574	4	0.0	60.25%	0	-
g10619	scaffold00028	hypothetical protein PFICI_14778	326	10	1.20882e-152	75.4%	0	-
g1062	scaffold00002	het-domain-containing protein	458	10	1.57256e-66	51.0%	0	-
g10620	scaffold00028	fg-gap repeat domain-containing protein	709	10	0.0	64.4%	1	F:metallopeptidase activity	-
g10621	scaffold00028	---NA---	323	0			0	-
g10622	scaffold00028	---NA---	388	0			0	-
g10623	scaffold00028	cytochrome p450	505	10	0.0	67.0%	5	F:heme binding; F:oxidoreductase activity, acting on paired donors, with incorporation or reduction of molecular oxygen, reduced flavin or flavoprotein as one donor, and incorporation of one atom of oxygen; F:iron ion binding; F:electron carrier activity; P:oxidation-reduction process	EC:1.14.14
g10624	scaffold00028	---NA---	155	0			0	-
g10625	scaffold00028	short-chain oxidoreductase protein	307	10	7.36405e-173	81.2%	2	P:oxidation-reduction process; F:oxidoreductase activity	-
g10626	scaffold00028	fatty-acid amide	544	10	0.0	83.5%	2	F:carbon-nitrogen ligase activity, with glutamine as amido-N-donor; F:hydrolase activity, acting on carbon-nitrogen (but not peptide) bonds, in linear amides	-
g10627	scaffold00028	transcription factor cys6 protein	651	10	0.0	77.9%	5	F:sequence-specific DNA binding RNA polymerase II transcription factor activity; P:regulation of transcription from RNA polymerase II promoter; C:nucleus; F:zinc ion binding; P:transcription from RNA polymerase II promoter	-
g10628	scaffold00028	epoxide hydrolase protein	334	10	0.0	65.6%	2	F:catalytic activity; P:metabolic process	-
g10629	scaffold00028	unknown	827	1	1.52378e-07	49.0%	0	-
g1063	scaffold00002	hypothetical protein V501_06991	640	10	7.24968e-41	44.4%	0	-
g10630	scaffold00028	alpha-l-arabinofuranosidase b	503	10	0.0	89.9%	3	P:arabinan metabolic process; P:L-arabinose metabolic process; F:alpha-N-arabinofuranosidase activity	EC:3.2.1.55
g10631	scaffold00028	phosphatidylinositol transfer protein csr1	373	10	0.0	74.7%	0	-
g10632	scaffold00028	---NA---	238	0			0	-
g10633	scaffold00028	37s ribosomal protein rsm22 protein	425	10	0.0	64.4%	0	-
g10634	scaffold00028	---NA---	522	0			0	-
g10635	scaffold00028	hypothetical protein PFICI_14794	493	10	0.0	61.1%	0	-
g10636	scaffold00028	---NA---	152	0			0	-
g10637	scaffold00028	---NA---	218	0			0	-
g10638	scaffold00028	hypothetical protein PFICI_14795	234	2	1.09813e-65	63.5%	0	-
g10639	scaffold00028	---NA---	257	0			0	-
g1064	scaffold00002	hypothetical protein TW65_04444	137	10	1.23994e-21	59.8%	3	F:molecular_function; P:biological_process; C:cellular_component
g10640	scaffold00028	glycoside hydrolase family 11 protein	220	10	1.83653e-136	86.4%	2	P:xylan catabolic process; F:endo-1,4-beta-xylanase activity	EC:3.2.1.8
g10641	scaffold00028	acetyltransferase	637	10	0.0	67.3%	1	F:N-acetyltransferase activity	EC:2.3.1
g10642	scaffold00028	---NA---	248	0			0	-
g10643	scaffold00028	---NA---	633	0			0	-
g10644	scaffold00028	laminin subunit alpha-2	694	10	0.0	56.9%	0	-
g10645	scaffold00028	cytochrome p450	516	10	0.0	69.6%	8	F:heme binding; F:oxidoreductase activity, acting on paired donors, with incorporation or reduction of molecular oxygen; F:monooxygenase activity; F:iron ion binding; P:methylation; F:electron carrier activity; P:oxidation-reduction process; F:methyltransferase activity	-
g10646	scaffold00028	---NA---	465	0			0	-
g10647	scaffold00028	---NA---	189	0			0	-
g10648	scaffold00028	related to integral membrane protein pth11	436	10	0.0	61.4%	0	-
g10649	scaffold00028	---NA---	262	0			0	-
g1065	scaffold00002	hypothetical protein PFICI_05767	289	10	8.49603e-155	55.1%	0	-
g10650	scaffold00028	hypothetical protein CI238_13243, partial	504	8	2.91604e-64	48.25%	0	-
g10651	scaffold00028	4-aminobutyrate aminotransferase	460	10	0.0	89.4%	3	F:pyridoxal phosphate binding; P:gamma-aminobutyric acid metabolic process; F:4-aminobutyrate transaminase activity	EC:2.6.1.19
g10652	scaffold00028	2-haloalkanoic acid protein	243	10	3.18546e-154	85.5%	0	-
g10653	scaffold00028	---NA---	269	0			0	-
g10654	scaffold00028	fad dependent oxidoreductase superfamily protein	1006	10	0.0	83.5%	2	P:oxidation-reduction process; F:oxidoreductase activity	-
g10655	scaffold00028	---NA---	342	0			0	-
g10656	scaffold00028	mitochondrial ribosomal protein subunit s4 protein	679	10	0.0	86.7%	1	F:adenyl nucleotide binding	-
g10657	scaffold00028	di-copper centre-containing protein	336	10	0.0	69.1%	3	F:metal ion binding; F:oxidoreductase activity; P:oxidation-reduction process	-
g10658	scaffold00028	---NA---	215	0			0	-
g10659	scaffold00028	amino acid transporter	571	10	0.0	71.1%	0	-
g1066	scaffold00002	hypothetical protein PV04_01590	870	10	9.87854e-106	51.4%	0	-
g10660	scaffold00028	membrane attack complex component perforin	1002	10	7.97681e-120	51.5%	0	-
g10661	scaffold00028	---NA---	127	0			0	-
g10662	scaffold00028	related to 3-hydroxyisobutyrate dehydrogenase	318	10	0.0	76.1%	3	P:pentose-phosphate shunt; F:phosphogluconate dehydrogenase (decarboxylating) activity; F:coenzyme binding	EC:1.1.1.44
g10663	scaffold00028	---NA---	117	0			0	-
g10664	scaffold00028	metallo-beta-lactamase superfamily protein	270	10	4.64937e-127	61.1%	1	F:hydrolase activity	-
g10665	scaffold00028	calcineurin-like phosphoesterase	468	10	0.0	80.0%	0	-
g10666	scaffold00028	hypothetical protein DHEL01_03223	222	1	0.0761681	68.0%	0	-
g10667	scaffold00028	alcohol dehydrogenase	302	10	5.85365e-163	70.5%	2	P:oxidation-reduction process; F:oxidoreductase activity	-
g10668	scaffold00028	---NA---	168	0			0	-
g10669	scaffold00028	hypothetical protein PFICI_14684	130	2	9.80834e-45	66.5%	0	-
g1067	scaffold00002	hypothetical protein PFICI_05766	186	10	6.69934e-99	60.6%	0	-
g10670	scaffold00028	---NA---	240	0			0	-
g10671	scaffold00028	atp synthase subunit 9	146	10	1.13189e-88	87.9%	7	F:hydrogen ion transmembrane transporter activity; C:mitochondrial membrane; C:integral to membrane; P:ATP synthesis coupled proton transport; F:lipid binding; C:proton-transporting ATP synthase complex, coupling factor F(o); P:ATP hydrolysis coupled proton transport	-
g10672	scaffold00028	---NA---	339	0			0	-
g10673	scaffold00028	hypothetical protein PFICI_14530	1046	10	0.0	47.7%	0	-
g10674	scaffold00028	na(+) h(+) antiporter 2	1035	10	0.0	76.0%	0	-
g10675	scaffold00028	hypothetical protein O988_09669	244	2	1.01106e-12	57.0%	0	-
g10676	scaffold00028	---NA---	246	0			0	-
g10677	scaffold00028	glycoside hydrolase family 55 protein	967	10	0.0	79.6%	1	F:hydrolase activity	-
g10678	scaffold00028	mitochondrial import receptor subunit tom-22	817	10	2.52715e-76	79.6%	2	P:intracellular protein transport; C:mitochondrial outer membrane	-
g10679	scaffold00028	hypothetical protein PFICI_14536	662	1	4.82351e-64	67.0%	0	-
g1068	scaffold00002	hypothetical protein PFICI_05765	234	10	3.69126e-126	58.0%	0	-
g10680	scaffold00028	hypothetical protein PFICI_14535	340	1	4.37959e-70	62.0%	0	-
g10681	scaffold00028	hypothetical protein PFICI_00762	933	2	9.17647e-16	43.5%	0	-
g10682	scaffold00028	hypothetical protein PFICI_00762	634	2	1.48698e-72	49.0%	0	-
g10683	scaffold00028	---NA---	274	0			0	-
g10684	scaffold00028	hypothetical protein PFICI_14537	155	2	5.79277e-09	50.0%	0	-
g10685	scaffold00028	hypothetical protein PFICI_14539	663	10	0.0	52.8%	0	-
g10686	scaffold00028	hypothetical protein PFICI_14540	855	10	0.0	81.3%	6	P:DNA replication; F:DNA binding; F:ATP binding; P:DNA ligation involved in DNA repair; F:DNA ligase (ATP) activity; P:DNA recombination	EC:6.5.1.1
g10687	scaffold00028	hypothetical protein FOXG_20303	732	1	4.71589e-58	62.0%	0	-
g10688	scaffold00028	dna repair and recombination protein pif1	915	10	0.0	67.6%	0	-
g10689	scaffold00028	---NA---	158	0			0	-
g1069	scaffold00002	hypothetical protein PFICI_04703	146	10	6.73151e-81	56.7%	0	-
g10690	scaffold00028	membrane protein	150	10	1.90593e-59	62.3%	0	-
g10691	scaffold00028	---NA---	113	0			0	-
g10692	scaffold00028	hypothetical protein PFICI_14543	491	10	0.0	58.4%	0	-
g10693	scaffold00028	gpi-anchored cell wall organization protein ecm33	422	10	0.0	52.8%	0	-
g10694	scaffold00028	---NA---	312	0			0	-
g10695	scaffold00028	dna ligase i	1233	10	0.0	78.1%	0	-
g10696	scaffold00028	---NA---	398	0			0	-
g10697	scaffold00028	uracil phosphoribosyltransferase	228	10	7.02164e-144	84.7%	0	-
g10698	scaffold00028	dfdf domain-containing protein	1241	10	0.0	70.6%	0	-
g10699	scaffold00028	---NA---	118	0			0	-
g107	scaffold00001	glycoside hydrolase family 81 protein	714	10	0.0	77.6%	3	F:glucan endo-1,4-beta-glucanase activity, C-3 substituted reducing group; F:glucan endo-1,3-beta-glucanase activity, C-3 substituted reducing group; P:cell wall macromolecule catabolic process	EC:3.2.1.6
g1070	scaffold00002	hypothetical protein PFICI_01982	253	10	1.34831e-163	69.8%	0	-
g10700	scaffold00028	---NA---	190	0			0	-
g10701	scaffold00028	alcohol dehydrogenase	348	10	0.0	86.8%	0	-
g10702	scaffold00028	---NA---	232	0			0	-
g10703	scaffold00028	uridine kinase	855	10	0.0	88.3%	7	F:nucleoside-triphosphatase activity; F:uridine kinase activity; P:CTP salvage; F:phosphotransferase activity, alcohol group as acceptor; F:ATP binding; P:UMP salvage; P:phosphorylation	EC:2.7.1.48; EC:3.6.1.15
g10704	scaffold00028	o-pyrocatechuate decarboxylase protein	378	10	0.0	71.7%	2	P:metabolic process; F:hydrolase activity	-
g10705	scaffold00028	ran binding protein in the microtubule-organising centre	275	10	8.72542e-151	80.0%	0	-
g10706	scaffold00028	nadh-ubiquinone oxidoreductase	406	10	1.40353e-121	79.2%	2	F:oxidoreductase activity, acting on NAD(P)H; P:electron transport chain	-
g10707	scaffold00028	---NA---	172	0			0	-
g10708	scaffold00028	mitochondrial f1f0 atp synthase subunit f protein	102	10	8.89788e-63	89.4%	5	F:proton-transporting ATPase activity, rotational mechanism; F:proton-transporting ATP synthase activity, rotational mechanism; P:ATP synthesis coupled proton transport; C:mitochondrial proton-transporting ATP synthase complex, coupling factor F(o); P:ATP catabolic process	-
g10709	scaffold00028	related to pan1-actin-cytoskeleton assembly protein	1284	10	0.0	56.0%	0	-
g1071	scaffold00002	---NA---	264	0			0	-
g10710	scaffold00028	---NA---	340	0			0	-
g10711	scaffold00028	---NA---	255	0			0	-
g10712	scaffold00028	dna replication licensing factor mcm6	953	10	0.0	85.7%	0	-
g10713	scaffold00028	hypothetical protein PGUG_03864	805	3	4.20107e-44	52.33%	0	-
g10714	scaffold00028	e3 ubiquitin-protein ligase ari7	571	10	0.0	51.3%	1	F:zinc ion binding	-
g10715	scaffold00028	hypothetical protein PFICI_14562	329	1	1.36513e-85	77.0%	0	-
g10716	scaffold00028	---NA---	200	0			0	-
g10717	scaffold00028	hypothetical protein PFICI_14561	229	10	6.42715e-126	72.5%	0	-
g10718	scaffold00028	cellulose-binding protein	499	10	0.0	82.1%	2	F:catalytic activity; P:metabolic process	-
g10719	scaffold00028	---NA---	294	0			0	-
g1072	scaffold00002	acyl- dehydrogenase	430	10	0.0	79.5%	0	-
g10720	scaffold00028	hypothetical protein PFICI_14559	91	10	1.4243e-46	64.4%	0	-
g10721	scaffold00028	---NA---	449	0			0	-
g10722	scaffold00028	fad fmn-containing dehydrogenase	492	10	0.0	57.7%	3	F:flavin adenine dinucleotide binding; F:UDP-N-acetylmuramate dehydrogenase activity; P:oxidation-reduction process	EC:1.1.1.158
g10723	scaffold00028	stress responsive a b barrel domain protein	110	10	6.80797e-53	75.3%	0	-
g10724	scaffold00028	hypothetical protein PFICI_14565	493	10	0.0	72.1%	0	-
g10725	scaffold00028	---NA---	251	0			0	-
g10726	scaffold00028	rta1 domain	368	10	1.48367e-147	76.6%	2	C:integral to membrane; P:response to stress	-
g10727	scaffold00028	---NA---	239	0			0	-
g10728	scaffold00028	uncharacterized protein PAC_01228	507	10	4.48347e-07	51.8%	0	-
g10729	scaffold00028	predicted protein	174	1	3.96448e-26	55.0%	2	F:ribonuclease activity; F:RNA binding	-
g1073	scaffold00002	---NA---	173	0			0	-
g10730	scaffold00028	hypothetical protein LEMA_P058250.1	281	10	2.46644e-38	47.5%	0	-
g10731	scaffold00028	hypothetical protein VFPFJ_10832	94	10	2.22382e-33	74.6%	0	-
g10732	scaffold00028	negative acting factor	1245	10	0.0	49.3%	6	P:regulation of transcription, DNA-dependent; P:transcription from RNA polymerase II promoter; F:sequence-specific DNA binding RNA polymerase II transcription factor activity; F:zinc ion binding; P:regulation of transcription from RNA polymerase II promoter; C:nucleus
g10733	scaffold00028	---NA---	445	0			0	-
g10734	scaffold00028	hypothetical protein PFICI_14571	275	10	2.24229e-132	65.0%	0	-
g10735	scaffold00028	---NA---	276	0			0	-
g10736	scaffold00028	hypothetical protein PFICI_14573	265	10	1.12443e-101	57.8%	0	-
g10737	scaffold00028	phospholipase d p1	860	10	0.0	88.8%	2	F:catalytic activity; P:metabolic process	-
g10738	scaffold00028	hypothetical protein VM1G_12024	210	1	14.7039	52.0%	0	-
g10739	scaffold00028	hypothetical protein VM1G_12024	439	1	7.57149e-12	42.0%	0	-
g1074	scaffold00002	hypothetical protein Z520_01831	733	10	0.0	68.0%	4	F:flavin adenine dinucleotide binding; F:N,N-dimethylaniline monooxygenase activity; P:oxidation-reduction process; F:NADP binding	EC:1.14.13.8
g10740	scaffold00028	glycoside hydrolase family 128 protein	510	10	0.0	68.1%	2	F:catalytic activity; P:carbohydrate metabolic process	-
g10741	scaffold00028	tetratricopeptide repeat protein 1	269	10	2.15459e-134	81.4%	0	-
g10742	scaffold00028	haloacid dehalogenase-like hydrolase protein	314	10	0.0	83.9%	2	P:metabolic process; F:hydrolase activity	-
g10743	scaffold00028	wd repeat-containing protein	733	10	0.0	68.8%	3	P:chromatin modification; C:nucleus; F:transferase activity, transferring acyl groups	-
g10744	scaffold00028	c6 zinc finger domain-containing protein	1111	10	0.0	67.3%	5	F:sequence-specific DNA binding RNA polymerase II transcription factor activity; P:regulation of transcription from RNA polymerase II promoter; C:nucleus; F:zinc ion binding; P:transcription from RNA polymerase II promoter	-
g10745	scaffold00028	glycerol-3-phosphate acyltransferase	825	10	0.0	87.1%	3	C:membrane; F:glycerol-3-phosphate O-acyltransferase activity; P:phospholipid biosynthetic process	EC:2.3.1.15
g10746	scaffold00028	---NA---	241	0			0	-
g10747	scaffold00028	ribonuclease p protein subunit p29	229	10	8.38222e-137	78.4%	0	-
g10748	scaffold00028	beta-lactamase family protein	591	10	0.0	65.0%	0	-
g10749	scaffold00028	hypothetical protein Micbo1qcDRAFT_206752	831	10	1.85758e-11	55.9%	0	-
g1075	scaffold00002	cytochrome p450	1201	10	0.0	67.2%	6	F:heme binding; F:oxidoreductase activity, acting on paired donors, with incorporation or reduction of molecular oxygen; F:monooxygenase activity; F:iron ion binding; F:electron carrier activity; P:oxidation-reduction process	-
g10750	scaffold00028	xap5 domain-containing protein	345	10	0.0	74.8%	1	C:nucleus	-
g10751	scaffold00028	pre-mrna polyadenylation factor fip1 protein	315	10	4.63817e-105	73.3%	0	-
g10752	scaffold00028	nucleoporin nup49 nsp49 protein	625	10	0.0	63.5%	0	-
g10753	scaffold00028	allantoate permease	561	10	0.0	82.9%	2	P:transmembrane transport; C:integral to membrane	-
g10754	scaffold00028	hypothetical protein SPBR_00042	326	2	1.13552e-05	48.0%	0	-
g10755	scaffold00028	major facilitator superfamily transporter	570	10	0.0	60.5%	0	-
g10756	scaffold00028	---NA---	335	0			0	-
g10757	scaffold00028	pyridoxine protein	273	10	6.47455e-137	69.2%	0	-
g10758	scaffold00028	vacuolar carboxypeptidase	237	1	0.000522267	50.0%	5	P:proteolysis; F:metallopeptidase activity; F:carboxypeptidase activity; F:hydrolase activity; P:metabolic process
g10759	scaffold00028	uncharacterised protein	652	10	5.36574e-70	59.8%	0	-
g1076	scaffold00002	hypothetical protein PFICI_10814	648	10	0.0	53.5%	6	F:sequence-specific DNA binding RNA polymerase II transcription factor activity; P:regulation of transcription from RNA polymerase II promoter; F:nucleic acid binding; C:nucleus; F:zinc ion binding; P:transcription from RNA polymerase II promoter	-
g10760	scaffold00028	pyridoxine biosynthesis protein	319	10	0.0	89.7%	0	-
g10761	scaffold00028	---NA---	211	0			0	-
g10762	scaffold00028	---NA---	307	0			0	-
g10763	scaffold00028	feruloyl esterase	373	10	0.0	76.3%	0	-
g10764	scaffold00028	integral membrane protein	657	10	0.0	48.2%	0	-
g10765	scaffold00028	---NA---	205	0			0	-
g10766	scaffold00028	---NA---	589	0			0	-
g10767	scaffold00028	---NA---	101	0			0	-
g10768	scaffold00028	c-x8-c-x5-c-x3-h type zinc finger protein	545	10	0.0	64.0%	0	-
g10769	scaffold00028	---NA---	385	0			0	-
g1077	scaffold00002	major facilitator superfamily protein	339	10	5.63132e-162	77.8%	0	-
g10770	scaffold00028	hypothetical protein CONLIGDRAFT_678433	109	6	2.71222e-05	58.0%	0	-
g10771	scaffold00028	hypothetical protein RIB2604_00606860	575	10	5.28079e-55	47.6%	0	-
g10772	scaffold00028	atpase aaa+ type core protein	750	10	2.88798e-169	57.3%	0	-
g10773	scaffold00028	c6 transcription	1024	10	0.0	62.2%	6	P:regulation of transcription from RNA polymerase II promoter; F:zinc ion binding; F:sequence-specific DNA binding RNA polymerase II transcription factor activity; F:DNA binding; C:nucleus; P:transcription from RNA polymerase II promoter	-
g10774	scaffold00028	cfem domain-containing protein	584	10	1.02981e-162	65.7%	0	-
g10775	scaffold00028	choline dehydrogenase	707	10	0.0	79.7%	0	-
g10776	scaffold00028	---NA---	324	0			0	-
g10777	scaffold00028	major myo-inositol transporter iolt	519	10	0.0	85.0%	3	P:transmembrane transport; C:integral to membrane; F:transmembrane transporter activity	-
g10778	scaffold00028	hypothetical protein T310_5774	345	1	4.88542	53.0%	0	-
g10779	scaffold00028	nucleoside-diphosphate-sugar epimerase	252	10	1.3774e-126	77.4%	2	P:biological_process; C:cellular_component
g1078	scaffold00002	fad nad -binding domain-containing protein	449	10	0.0	68.1%	2	P:oxidation-reduction process; F:oxidoreductase activity	-
g10780	scaffold00028	paired amphipathic helix protein sin3a	765	10	1.41889e-107	78.8%	0	-
g10781	scaffold00028	major facilitator superfamily transporter	1072	10	0.0	82.1%	0	-
g10782	scaffold00028	---NA---	288	0			0	-
g10783	scaffold00028	multicopper oxidase	630	10	0.0	82.6%	0	-
g10784	scaffold00028	cytochrome p450 protein	211	10	2.07988e-120	59.4%	0	-
g10785	scaffold00028	hypothetical protein PFICI_14605	457	5	1.60311e-167	59.2%	0	-
g10786	scaffold00028	start control protein cdc10 protein	1061	10	0.0	77.6%	3	F:sequence-specific DNA binding transcription factor activity; F:DNA binding; P:regulation of transcription, DNA-dependent	-
g10787	scaffold00028	siroheme synthase	261	10	6.33168e-115	48.1%	7	F:molecular_function; P:biological_process; C:cellular_component; F:precorrin-2 dehydrogenase activity; P:oxidation-reduction process; P:porphyrin-containing compound biosynthetic process; P:siroheme biosynthetic process
g10788	scaffold00028	---NA---	174	0			0	-
g10789	scaffold00028	hypothetical protein PFICI_14608	382	10	3.11865e-167	52.8%	0	-
g1079	scaffold00002	hypothetical protein PFICI_02225	126	4	2.34377e-25	57.0%	0	-
g10790	scaffold00028	hypothetical protein VM1G_02954	493	10	3.79364e-33	62.5%	0	-
g10791	scaffold00028	dihydrolipoamide dehydrogenase	515	10	0.0	70.4%	0	-
g10792	scaffold00028	bzip-type transcription factor	590	10	6.11964e-100	43.5%	0	-
g10793	scaffold00028	hypothetical protein PFICI_14239	663	10	0.0	49.5%	0	-
g10794	scaffold00028	unnamed protein product	108	10	1.74857e-15	57.0%	0	-
g10795	scaffold00028	kinase-like protein	468	10	3.18205e-152	57.8%	1	F:transferase activity, transferring phosphorus-containing groups	-
g10796	scaffold00028	hypothetical protein PFICI_11235	263	10	1.49132e-172	76.0%	0	-
g10797	scaffold00028	---NA---	157	0			0	-
g10798	scaffold00028	geranylgeranyl pyrophosphate synthetase	387	10	0.0	63.3%	0	-
g10799	scaffold00028	stage v sporulation protein k	2524	10	0.0	72.9%	2	F:nucleoside-triphosphatase activity; F:ATP binding	EC:3.6.1.15
g108	scaffold00001	triacylglycerol lipase	335	10	0.0	89.7%	0	-
g1080	scaffold00002	altered inheritance of mitochondria protein mitochondrial	580	10	1.87366e-91	62.9%	1	F:transferase activity, transferring phosphorus-containing groups
g10800	scaffold00028	---NA---	527	0			0	-
g10801	scaffold00028	hypothetical protein HIM_11327	670	10	0.0	66.0%	0	-
g10802	scaffold00028	fad binding domain-containing protein	492	10	0.0	85.2%	0	-
g10803	scaffold00028	related to integral membrane protein pth11	412	10	0.0	78.1%	0	-
g10804	scaffold00028	---NA---	115	0			0	-
g10805	scaffold00028	---NA---	392	0			0	-
g10806	scaffold00028	hypothetical protein ZTR_09381	432	10	0.0	85.8%	3	F:molecular_function; P:biological_process; C:cellular_component
g10807	scaffold00028	hypothetical protein V496_01347	319	10	6.29199e-168	84.1%	0	-
g10808	scaffold00028	hypothetical protein T310_2963	186	1	7.23109	60.0%	0	-
g10809	scaffold00028	hypothetical protein CC84DRAFT_1159611	115	9	0.00278278	53.22%	0	-
g1081	scaffold00002	---NA---	202	0			0	-
g10810	scaffold00028	---NA---	280	0			0	-
g10811	scaffold00028	---NA---	210	0			0	-
g10812	scaffold00028	ankyrin repeat-containing domain protein	401	10	4.85324e-139	64.9%	0	-
g10813	scaffold00028	zinc finger c2h2-type protein	341	10	3.26355e-157	64.7%	0	-
g10814	scaffold00028	zinc finger protein adr1	257	10	1.26312e-56	57.9%	0	-
g10815	scaffold00028	hypothetical protein PFICI_12446	449	10	0.0	60.2%	1	F:metal ion binding	-
g10816	scaffold00028	mfs allantoate transporter	1112	10	0.0	82.1%	0	-
g10817	scaffold00028	---NA---	113	0			0	-
g10818	scaffold00028	flavin-containing monooxygenase-like	609	10	0.0	86.9%	0	-
g10819	scaffold00028	---NA---	492	0			0	-
g1082	scaffold00002	minor allergen alt a 7	528	10	3.52252e-125	85.7%	0	-
g10820	scaffold00028	clavaminate synthase-like protein	388	10	0.0	73.7%	0	-
g10821	scaffold00028	fad nad -binding domain-containing protein	610	10	0.0	79.8%	0	-
g10822	scaffold00028	---NA---	123	0			0	-
g10823	scaffold00028	related to multidrug resistant protein	525	10	0.0	74.9%	2	P:transmembrane transport; C:integral to membrane	-
g10824	scaffold00028	---NA---	273	0			0	-
g10825	scaffold00028	integral membrane protein	297	10	4.77529e-165	71.0%	0	-
g10826	scaffold00028	hypothetical protein PFICI_14986	512	10	0.0	80.7%	6	F:heme binding; F:oxidoreductase activity, acting on paired donors, with incorporation or reduction of molecular oxygen; F:monooxygenase activity; F:iron ion binding; F:electron carrier activity; P:oxidation-reduction process	-
g10827	scaffold00028	oxysterol-binding protein	174	10	7.38163e-24	59.3%	1	F:phospholipid binding
g10828	scaffold00028	integral membrane protein	288	10	1.55152e-161	72.9%	0	-
g10829	scaffold00028	---NA---	165	0			0	-
g1083	scaffold00002	---NA---	126	0			0	-
g10830	scaffold00028	isoeugenol monooxygenase	1012	10	0.0	90.0%	2	F:oxidoreductase activity, acting on single donors with incorporation of molecular oxygen, incorporation of two atoms of oxygen; F:monooxygenase activity	EC:1.13.11
g10831	scaffold00028	---NA---	107	0			0	-
g10832	scaffold00028	heterokaryon incompatibility protein (het-6or allele)	845	10	0.0	49.9%	0	-
g10833	scaffold00028	hypothetical protein TW65_00901	102	3	3.65952e-14	52.33%	0	-
g10834	scaffold00028	sugar transporter stl1 protein	516	10	0.0	83.3%	3	F:substrate-specific transmembrane transporter activity; C:integral to membrane; P:transmembrane transport	-
g10835	scaffold00028	---NA---	313	0			0	-
g10836	scaffold00028	3-carboxy- -muconate cycloisomerase	581	10	0.0	86.7%	0	-
g10837	scaffold00028	hypothetical protein AL509_04060	187	1	2.34082e-05	57.0%	0	-
g10838	scaffold00028	sugar inositol transporter	669	10	0.0	54.7%	4	P:transcription, DNA-dependent; F:zinc ion binding; C:nucleus; F:DNA binding
g10839	scaffold00028	dna-directed rna polymerase i subunit a43	539	10	1.09754e-167	43.4%	6	P:regulation of transcription, DNA-dependent; P:transcription from RNA polymerase II promoter; F:sequence-specific DNA binding RNA polymerase II transcription factor activity; F:zinc ion binding; P:regulation of transcription from RNA polymerase II promoter; C:nucleus
g1084	scaffold00002	hypothetical protein CLUG_00481	202	6	2.83571e-13	54.33%	0	-
g10840	scaffold00028	type b	580	10	0.0	70.7%	0	-
g10841	scaffold00028	---NA---	385	0			0	-
g10842	scaffold00028	f-box domain containing protein	606	10	0.0	58.9%	0	-
g10843	scaffold00028	aflatoxin b1 aldehyde reductase	352	10	0.0	81.7%	0	-
g10844	scaffold00028	related to multidrug resistant protein	1072	10	0.0	80.8%	2	P:transmembrane transport; C:integral to membrane	-
g10845	scaffold00028	mfs general substrate transporter	501	10	0.0	78.6%	2	P:transmembrane transport; C:integral to membrane	-
g10846	scaffold00028	fad dependent oxidoreductase superfamily protein	788	10	0.0	74.8%	2	P:oxidation-reduction process; F:oxidoreductase activity	-
g10847	scaffold00028	haloacid type ii	228	10	1.48879e-156	82.9%	2	P:metabolic process; F:hydrolase activity, acting on acid halide bonds, in C-halide compounds	-
g10848	scaffold00028	---NA---	79	0			0	-
g10849	scaffold00028	---NA---	146	0			0	-
g1085	scaffold00002	fad nad -binding protein	589	10	0.0	74.3%	0	-
g10850	scaffold00028	c6 transcription factor	650	10	0.0	60.9%	6	P:regulation of transcription from RNA polymerase II promoter; F:zinc ion binding; F:sequence-specific DNA binding RNA polymerase II transcription factor activity; F:DNA binding; C:nucleus; P:transcription from RNA polymerase II promoter	-
g10851	scaffold00028	---NA---	342	0			0	-
g10852	scaffold00028	pdcd2_c domain-containing protein	413	10	0.0	76.5%	0	-
g10853	scaffold00028	protein pns1	525	10	0.0	82.0%	0	-
g10854	scaffold00028	fad binding domain-containing protein	603	10	0.0	58.7%	0	-
g10855	scaffold00028	---NA---	176	0			0	-
g10856	scaffold00028	hypothetical protein PFICI_12438	545	2	1.32714e-40	53.0%	0	-
g10857	scaffold00028	feruloyl esterase b	291	10	0.0	81.9%	6	P:interaction with host via protein secreted by type II secretion system; F:feruloyl esterase activity; F:carboxylesterase activity; C:extracellular region; P:cell wall macromolecule catabolic process; P:xylan catabolic process	EC:3.1.1.73; EC:3.1.1.1
g10858	scaffold00028	cell division cycle 123 protein	312	10	4.33903e-97	63.9%	0	-
g10859	scaffold00028	---NA---	232	0			0	-
g1086	scaffold00002	---NA---	485	0			0	-
g10860	scaffold00028	tsa family protein	196	10	8.34039e-118	76.7%	2	P:oxidation-reduction process; F:oxidoreductase activity	-
g10861	scaffold00028	major facilitator superfamily transporter	482	10	0.0	89.6%	0	-
g10862	scaffold00028	---NA---	122	0			0	-
g10863	scaffold00028	duf167 domain protein	284	10	3.23623e-59	70.2%	0	-
g10864	scaffold00028	c6 zinc finger protein	444	10	1.49549e-33	44.3%	6	P:regulation of transcription, DNA-dependent; P:transcription from RNA polymerase II promoter; F:sequence-specific DNA binding RNA polymerase II transcription factor activity; F:zinc ion binding; P:regulation of transcription from RNA polymerase II promoter; C:nucleus
g10865	scaffold00028	---NA---	183	0			0	-
g10866	scaffold00028	hypothetical protein FOXB_10682	429	10	4.19991e-152	63.4%	2	P:lipid catabolic process; F:triglyceride lipase activity	EC:3.1.1.3
g10867	scaffold00028	---NA---	589	0			0	-
g10868	scaffold00028	dienelactone hydrolase	159	10	1.50091e-78	56.2%	1	F:hydrolase activity	-
g10869	scaffold00028	25s rrna (uridine -n )-methyltransferase	402	10	0.0	65.6%	0	-
g1087	scaffold00002	histone h1 5	243	10	1.12025e-27	65.9%	0	-
g10870	scaffold00028	hypothetical protein GLAREA_09347	497	10	1.27643e-80	65.7%	0	-
g10871	scaffold00028	hypothetical protein PFICI_14735	121	10	1.46005e-50	56.6%	0	-
g10872	scaffold00028	homeobox domain containing protein	494	10	1.93293e-82	53.7%	2	F:cysteine-type endopeptidase activity; P:proteolysis	EC:3.4.22
g10873	scaffold00029	---NA---	245	0			0	-
g10874	scaffold00029	---NA---	104	0			0	-
g10875	scaffold00029	cytochrome p450	522	10	0.0	78.9%	0	-
g10876	scaffold00029	---NA---	400	0			0	-
g10877	scaffold00029	hypothetical protein PFICI_07674	359	10	2.34266e-129	56.4%	0	-
g10878	scaffold00029	---NA---	246	0			0	-
g10879	scaffold00029	---NA---	291	0			0	-
g1088	scaffold00002	---NA---	423	0			0	-
g10880	scaffold00029	signal sequence receptor alpha chain protein	266	10	6.4379e-159	74.3%	1	C:endoplasmic reticulum	-
g10881	scaffold00029	---NA---	235	0			0	-
g10882	scaffold00029	fumarylacetoacetase	415	10	0.0	76.5%	2	F:fumarylacetoacetase activity; P:aromatic amino acid family metabolic process	EC:3.7.1.2
g10883	scaffold00029	x-pro dipeptidyl-peptidase c-terminal non-catalytic domain-containing protein	608	10	0.0	88.6%	0	-
g10884	scaffold00029	---NA---	547	0			0	-
g10885	scaffold00029	x-pro dipeptidyl-peptidase c-terminal non-catalytic domain-containing protein	125	10	5.97237e-51	70.9%	0	-
g10886	scaffold00029	---NA---	370	0			0	-
g10887	scaffold00029	aldehyde dehydrogenase	490	10	0.0	78.8%	2	F:oxidoreductase activity, acting on the aldehyde or oxo group of donors, NAD or NADP as acceptor; P:oxidation-reduction process	-
g10888	scaffold00029	aromatic ring-opening dioxygenase family protein	316	10	0.0	85.7%	0	-
g10889	scaffold00029	---NA---	526	0			0	-
g1089	scaffold00002	hypothetical protein PFICI_03160	670	10	0.0	52.7%	0	-
g10890	scaffold00029	alpha beta	431	10	0.0	64.4%	1	F:aminopeptidase activity	EC:3.4.11
g10891	scaffold00029	purine-cytosine permease fcy22	241	6	2.4849e-38	52.33%	0	-
g10892	scaffold00029	integral membrane protein	337	10	0.0	69.9%	0	-
g10893	scaffold00029	---NA---	77	0			0	-
g10894	scaffold00029	---NA---	469	0			0	-
g10895	scaffold00029	---NA---	473	0			0	-
g10896	scaffold00029	---NA---	212	0			0	-
g10897	scaffold00029	choline dehydrogenase	653	10	0.0	82.9%	4	F:flavin adenine dinucleotide binding; F:choline dehydrogenase activity; P:oxidation-reduction process; P:alcohol metabolic process	EC:1.1.99.1
g10898	scaffold00029	---NA---	258	0			0	-
g10899	scaffold00029	ceramide glucosyltransferase	687	10	0.0	73.6%	1	F:transferase activity	-
g109	scaffold00001	---NA---	96	0			0	-
g1090	scaffold00002	---NA---	252	0			0	-
g10900	scaffold00029	---NA---	317	0			0	-
g10901	scaffold00029	trna-splicing endonuclease subunit sen2	538	10	0.0	62.8%	4	P:nucleic acid phosphodiester bond hydrolysis; F:nucleic acid binding; P:tRNA splicing, via endonucleolytic cleavage and ligation; F:tRNA-intron endonuclease activity	EC:3.1.27.9
g10902	scaffold00029	mfs general substrate transporter	514	10	0.0	73.8%	4	C:integral to membrane; C:plasma membrane; P:transmembrane transport; F:transporter activity	-
g10903	scaffold00029	---NA---	119	0			0	-
g10904	scaffold00029	alkaline protease 1	489	10	7.91935e-105	46.1%	0	-
g10905	scaffold00029	---NA---	402	0			0	-
g10906	scaffold00029	---NA---	616	0			0	-
g10907	scaffold00029	---NA---	157	0			0	-
g10908	scaffold00029	hypothetical protein PFICI_07690	226	2	4.07864e-57	54.0%	0	-
g10909	scaffold00029	hypothetical protein PFICI_07691	224	1	1.41932e-57	65.0%	0	-
g1091	scaffold00002	rnase h domain protein	127	10	8.5261e-05	45.2%	3	F:metal ion binding; F:nucleic acid binding; F:ribonuclease H activity
g10910	scaffold00029	het-domain-containing partial	601	10	0.0	58.1%	0	-
g10911	scaffold00029	low quality protein: dna repair protein rad51 homolog 2-like	392	2	1.81396e-42	65.0%	0	-
g10912	scaffold00029	ap-1 complex subunit mu-1	447	10	0.0	98.6%	3	C:clathrin adaptor complex; P:vesicle-mediated transport; P:intracellular protein transport	-
g10913	scaffold00029	---NA---	151	0			0	-
g10914	scaffold00029	clock controlled protein (transcription factor opi1)	640	10	0.0	65.0%	0	-
g10915	scaffold00029	gdsl-like lipase acylhydrolase	259	10	2.35899e-142	74.0%	0	-
g10916	scaffold00029	---NA---	196	0			0	-
g10917	scaffold00029	pheromone-regulated membrane protein	690	10	0.0	71.6%	0	-
g10918	scaffold00029	hypothetical protein PFICI_07697	223	1	4.49309e-87	78.0%	0	-
g10919	scaffold00029	---NA---	369	0			0	-
g1092	scaffold00002	cleavage and polyadenylylation specificity protein	1210	10	0.0	71.0%	4	P:mRNA polyadenylation; C:mRNA cleavage and polyadenylation specificity factor complex; F:hydrolase activity; P:mRNA cleavage	-
g10920	scaffold00029	domain containing protein	351	10	9.42753e-92	60.5%	3	P:protein folding; F:heat shock protein binding; F:unfolded protein binding	-
g10921	scaffold00029	---NA---	225	0			0	-
g10922	scaffold00029	glycoside hydrolase family 16 protein	257	10	1.06782e-162	77.8%	0	-
g10923	scaffold00029	heterokaryon incompatibility protein domain-containing protein	622	10	2.58583e-51	47.9%	3	F:molecular_function; P:biological_process; C:cellular_component
g10924	scaffold00029	cytochrome p450 oxidoreductase protein	531	10	0.0	80.2%	6	F:heme binding; F:oxidoreductase activity, acting on paired donors, with incorporation or reduction of molecular oxygen; F:monooxygenase activity; F:iron ion binding; F:electron carrier activity; P:oxidation-reduction process	-
g10925	scaffold00029	---NA---	209	0			0	-
g10926	scaffold00029	meiosis-specific topoisomerase spo11	416	10	9.73531e-163	56.8%	5	P:DNA metabolic process; F:DNA binding; F:ATP binding; C:chromosome; F:isomerase activity	-
g10927	scaffold00029	lanosterol synthase	1321	10	0.0	78.9%	2	F:intramolecular transferase activity; P:metabolic process	-
g10928	scaffold00029	---NA---	544	0			0	-
g10929	scaffold00029	ankyrin repeat containing protein yar1	207	10	7.35587e-96	68.4%	0	-
g1093	scaffold00002	---NA---	171	0			0	-
g10930	scaffold00029	pre-60s factor protein	487	7	1.76635e-93	52.86%	0	-
g10931	scaffold00029	---NA---	140	0			0	-
g10932	scaffold00029	major facilitator superfamily transporter	448	10	0.0	72.4%	2	P:transmembrane transport; C:integral to membrane	-
g10933	scaffold00029	ubiquitin c-terminal hydrolase	1727	10	0.0	63.3%	5	F:signal transducer activity; P:ubiquitin-dependent protein catabolic process; F:ubiquitin thiolesterase activity; P:signal transduction; F:cysteine-type peptidase activity	EC:3.1.2.15; EC:3.4
g10934	scaffold00029	---NA---	968	0			0	-
g10935	scaffold00029	hypothetical protein VP1G_11164	1341	10	2.91367e-113	54.4%	0	-
g10936	scaffold00029	4-aminobutyrate aminotransferase	502	10	0.0	89.5%	3	F:pyridoxal phosphate binding; P:gamma-aminobutyric acid metabolic process; F:4-aminobutyrate transaminase activity	EC:2.6.1.19
g10937	scaffold00029	glycosyl hydrolase family 35	987	10	0.0	81.3%	0	-
g10938	scaffold00029	hypothetical protein PFICI_07711	462	10	0.0	57.2%	0	-
g10939	scaffold00029	---NA---	250	0			0	-
g1094	scaffold00002	sec23 sec24 trunk domain-containing protein	1041	10	0.0	82.4%	4	C:COPII vesicle coat; P:intracellular protein transport; P:ER to Golgi vesicle-mediated transport; F:zinc ion binding	-
g10940	scaffold00029	uv excision repair protein	375	10	7.23915e-160	77.7%	0	-
g10941	scaffold00029	---NA---	300	0			0	-
g10942	scaffold00029	hypothetical protein CFIO01_06996	376	2	0.00235916	44.5%	0	-
g10943	scaffold00029	npd-domain-containing protein	355	10	0.0	75.8%	3	F:nitronate monooxygenase activity; P:oxidation-reduction process; F:oxidoreductase activity, acting on single donors with incorporation of molecular oxygen, incorporation of two atoms of oxygen	EC:1.13.11; EC:1.13.12.16
g10944	scaffold00029	---NA---	216	0			0	-
g10945	scaffold00029	carnitinyl- dehydratase	282	10	3.28666e-161	74.5%	0	-
g10946	scaffold00029	duf636 domain-containing partial	312	10	4.42111e-107	62.5%	0	-
g10947	scaffold00029	acyl- synthetases amp-acid ligases ii	556	10	0.0	67.9%	0	-
g10948	scaffold00029	acetyl- acetyltransferase	520	10	0.0	74.6%	2	F:transferase activity, transferring acyl groups other than amino-acyl groups; P:metabolic process	-
g10949	scaffold00029	het-domain-containing protein	973	10	0.0	54.8%	0	-
g1095	scaffold00002	---NA---	198	0			0	-
g10950	scaffold00029	hypothetical protein PFICI_06178	205	10	1.18303e-90	67.3%	0	-
g10951	scaffold00029	cytochrome p450	502	10	0.0	76.7%	6	F:heme binding; F:oxidoreductase activity, acting on paired donors, with incorporation or reduction of molecular oxygen; F:monooxygenase activity; F:iron ion binding; F:electron carrier activity; P:oxidation-reduction process	-
g10952	scaffold00029	---NA---	302	0			0	-
g10953	scaffold00029	integral membrane	376	10	0.0	59.1%	0	-
g10954	scaffold00029	related to transporter protein hol1	620	10	0.0	82.8%	0	-
g10955	scaffold00029	hypothetical protein CSIM01_00557	1695	10	0.0	48.4%	0	-
g10956	scaffold00029	---NA---	117	0			0	-
g10957	scaffold00029	segregation protein smc	402	2	1.91912e-59	46.0%	0	-
g10958	scaffold00029	hypothetical protein PFICI_08229	451	10	0.0	67.2%	0	-
g10959	scaffold00029	related to zinc alcohol dehydrogenase	357	10	0.0	71.6%	3	F:zinc ion binding; F:oxidoreductase activity; P:oxidation-reduction process	-
g1096	scaffold00002	---NA---	410	0			0	-
g10960	scaffold00029	predicted protein	259	1	0.00227674	40.0%	0	-
g10961	scaffold00029	conserved site	423	10	1.3489e-89	50.9%	0	-
g10962	scaffold00029	---NA---	492	0			0	-
g10963	scaffold00029	---NA---	272	0			0	-
g10964	scaffold00029	hypothetical protein PFICI_08237	333	10	0.0	62.4%	0	-
g10965	scaffold00029	hypothetical protein PFICI_08164	1321	10	0.0	46.3%	0	-
g10966	scaffold00029	---NA---	89	0			0	-
g10967	scaffold00029	ribonuclease h-like protein	741	10	1.10395e-06	38.7%	2	F:nucleic acid binding; F:ribonuclease H activity
g10968	scaffold00029	phosphoribosyl transferase domain protein	1152	10	0.0	68.8%	7	C:cytoplasm; F:flavin adenine dinucleotide binding; F:UDP-N-acetylmuramate dehydrogenase activity; F:phosphomevalonate kinase activity; P:cholesterol biosynthetic process; P:nucleoside metabolic process; P:oxidation-reduction process	EC:2.7.4.2; EC:1.1.1.158
g10969	scaffold00029	gtp cyclohydrolase i	240	10	1.01085e-74	71.2%	3	C:cytoplasm; F:GTP cyclohydrolase I activity; P:tetrahydrofolate biosynthetic process	EC:3.5.4.16
g1097	scaffold00002	---NA---	155	0			0	-
g10970	scaffold00029	---NA---	128	0			0	-
g10971	scaffold00029	het domain-containing protein	623	10	0.0	64.7%	0	-
g10972	scaffold00029	---NA---	156	0			0	-
g10973	scaffold00029	quinate permease	565	10	0.0	79.6%	0	-
g10974	scaffold00029	nrps-like enzyme	1040	10	0.0	59.1%	2	F:catalytic activity; P:metabolic process	-
g10975	scaffold00029	4-hydroxybenzoate polyprenyl transferase	337	10	2.19202e-147	64.7%	2	F:prenyltransferase activity; C:integral to membrane	EC:2.5.1
g10976	scaffold00029	p-loop containing nucleoside triphosphate hydrolase	1338	10	0.0	60.1%	0	-
g10977	scaffold00029	hypothetical protein PFICI_10840	847	10	0.0	53.4%	0	-
g10978	scaffold00029	family protein	234	10	2.33873e-127	76.4%	0	-
g10979	scaffold00029	c6 transcription factor	1122	10	0.0	52.7%	0	-
g1098	scaffold00002	mitochondrial chaperone bcs1	330	10	3.98888e-164	68.4%	0	-
g10980	scaffold00029	secreted protein	380	10	4.35729e-50	56.6%	0	-
g10981	scaffold00029	het-domain-containing protein	834	10	7.87702e-28	44.8%	0	-
g10982	scaffold00029	cytochrome p450 monooxygenase	294	10	3.45678e-173	73.1%	0	-
g10983	scaffold00029	---NA---	219	0			0	-
g10984	scaffold00029	cytochrome p450 monooxygenase	289	10	3.68834e-102	73.4%	0	-
g10985	scaffold00029	---NA---	188	0			0	-
g10986	scaffold00029	f-box domain protein	690	10	0.0	77.9%	0	-
g10987	scaffold00029	hypothetical protein V493_07882, partial	372	1	0.0126968	54.0%	0	-
g10988	scaffold00029	---NA---	422	0			0	-
g10989	scaffold00029	rrna-processing protein	352	10	2.74559e-43	42.5%	1	P:biological_process
g1099	scaffold00002	asparaginyl-trna synthetase	519	10	0.0	75.3%	5	F:asparagine-tRNA ligase activity; P:asparaginyl-tRNA aminoacylation; F:nucleic acid binding; F:ATP binding; C:cytoplasm	EC:6.1.1.22
g10990	scaffold00029	rrna-processing protein efg-1	276	10	2.14295e-124	61.0%	2	C:nucleolus; P:rRNA processing	-
g10991	scaffold00029	wd repeat domain-containing protein	1139	10	0.0	75.7%	0	-
g10992	scaffold00029	hypothetical protein PFICI_08268	93	10	3.28319e-45	79.6%	0	-
g10993	scaffold00029	hypothetical protein CSUB01_08440	497	1	3.37781e-08	57.0%	0	-
g10994	scaffold00029	membrane-associated proteins in eicosanoid and glutathione metabolism protein	164	10	1.79164e-83	73.6%	0	-
g10995	scaffold00029	swr1-complex protein 5	349	10	3.2548e-132	70.0%	0	-
g10996	scaffold00029	hypothetical protein BN1723_000768	110	1	3.3151	52.0%	0	-
g10997	scaffold00029	increased rdna silencing protein 4	695	10	0.0	51.5%	1	F:calcium ion binding
g10998	scaffold00029	microtubule associated protein	748	10	0.0	77.9%	3	P:microtubule cytoskeleton organization; P:cytokinesis; F:microtubule binding	-
g10999	scaffold00029	---NA---	210	0			0	-
g11	scaffold00001	---NA---	130	0			0	-
g110	scaffold00001	related to tartrate transporter	496	10	0.0	87.7%	2	P:transmembrane transport; C:integral to membrane	-
g1100	scaffold00002	---NA---	299	0			0	-
g11000	scaffold00029	trna-dihydrouridine synthase 1	589	10	0.0	75.6%	0	-
g11001	scaffold00029	hypothetical protein VP1G_11127	190	1	5.6109e-13	61.0%	0	-
g11002	scaffold00029	protein bni4	821	10	0.0	66.8%	0	-
g11003	scaffold00029	---NA---	171	0			0	-
g11004	scaffold00029	c6 zinc finger domain partial	257	10	2.4694e-63	50.2%	0	-
g11005	scaffold00029	heterokaryon incompatibility protein-domain-containing protein	1883	10	0.0	50.6%	0	-
g11006	scaffold00029	mfs sp sugar:h+ symporter	721	10	0.0	86.9%	0	-
g11007	scaffold00029	---NA---	300	0			0	-
g11008	scaffold00029	ring-opening amidohydrolase	348	10	2.17942e-169	75.6%	0	-
g11009	scaffold00029	myo-inositol transporter 1	533	10	0.0	87.4%	3	F:substrate-specific transmembrane transporter activity; C:integral to membrane; P:transmembrane transport	-
g1101	scaffold00002	---NA---	81	0			0	-
g11010	scaffold00029	hypothetical protein V500_00150	458	2	35.3266	48.5%	0	-
g11011	scaffold00029	arca-like protein	677	10	0.0	61.4%	5	F:sequence-specific DNA binding RNA polymerase II transcription factor activity; P:regulation of transcription from RNA polymerase II promoter; C:nucleus; F:zinc ion binding; P:transcription from RNA polymerase II promoter	-
g11012	scaffold00029	alcohol dehydrogenase	387	10	0.0	93.5%	3	F:zinc ion binding; F:oxidoreductase activity; P:oxidation-reduction process	-
g11013	scaffold00029	---NA---	207	0			0	-
g11014	scaffold00029	xylose isomerase tim barrel	294	10	0.0	75.2%	0	-
g11015	scaffold00029	ribosomal protein l49 img2	653	10	7.44934e-47	61.8%	3	C:ribosome; F:structural constituent of ribosome; P:translation	-
g11016	scaffold00029	eukaryotic translation initiation factor 3 subunit e	429	10	0.0	89.4%	6	C:eukaryotic translation initiation factor 3 complex; C:eukaryotic 43S preinitiation complex; C:eukaryotic 48S preinitiation complex; P:regulation of translational initiation; P:formation of translation preinitiation complex; F:translation initiation factor activity	-
g11017	scaffold00029	pas domain s-box protein	594	10	3.98905e-149	60.5%	15	F:transferase activity; P:intracellular signal transduction; P:signal transduction by phosphorylation; P:phosphorylation; C:membrane; F:nucleotide binding; F:ATP binding; F:kinase activity; P:signal transduction; P:phosphorelay signal transduction system; P:regulation of transcription, DNA-dependent; F:signal transducer activity; F:phosphorelay response regulator activity; F:phosphorelay sensor k…
g11018	scaffold00029	proline oxidase	513	10	1.28911e-131	66.4%	4	P:glutamate biosynthetic process; P:proline catabolic process; F:proline dehydrogenase activity; P:oxidation-reduction process	EC:1.5.99.8
g11019	scaffold00029	fungal specific transcription	138	10	4.03669e-59	62.8%	0	-
g1102	scaffold00002	camp-independent regulatory protein pac2	439	10	0.0	68.7%	0	-
g11020	scaffold00029	sphingolipid c9-methyltransferase protein	1487	10	0.0	71.3%	0	-
g11021	scaffold00029	enoyl- hydratase isomerase	270	10	0.0	86.9%	0	-
g11022	scaffold00029	hypothetical protein BN1708_013981, partial	357	1	4.68943	45.0%	0	-
g11023	scaffold00029	---NA---	337	0			0	-
g11024	scaffold00029	hypothetical protein PFICI_08297	201	10	8.70738e-126	72.0%	0	-
g11025	scaffold00029	diketo-d-gluconic acid reductase a	328	10	0.0	74.8%	2	P:oxidation-reduction process; F:oxidoreductase activity	-
g11026	scaffold00029	pq loop repeat protein	573	10	0.0	79.8%	0	-
g11027	scaffold00029	nadh pyrophosphatase	234	1	9.86297	60.0%	0	-
g11028	scaffold00029	hypothetical protein PFICI_08300	637	10	0.0	58.7%	0	-
g11029	scaffold00029	hypothetical protein FOXG_18198	148	1	5.66948e-16	67.0%	0	-
g1103	scaffold00002	---NA---	336	0			0	-
g11030	scaffold00029	kh domain rna-binding protein	390	10	0.0	86.5%	1	F:RNA binding	-
g11031	scaffold00029	---NA---	184	0			0	-
g11032	scaffold00029	hypothetical protein V493_07628, partial	449	2	0.000363461	55.0%	0	-
g11033	scaffold00029	uaa transporter	421	10	0.0	82.8%	2	P:transmembrane transport; C:integral to membrane	-
g11034	scaffold00029	tyrosine-protein phosphatase pmp1	863	10	0.0	67.9%	3	F:protein tyrosine phosphatase activity; F:protein tyrosine/serine/threonine phosphatase activity; P:peptidyl-tyrosine dephosphorylation	EC:3.1.3.48; EC:3.1.3
g11035	scaffold00029	---NA---	620	0			0	-
g11036	scaffold00029	lpxtg-motif cell wall anchor domain-containing protein	1077	10	0.0	58.7%	0	-
g11037	scaffold00029	---NA---	251	0			0	-
g11038	scaffold00029	---NA---	398	0			0	-
g11039	scaffold00029	trna 2 -phosphotransferase 1 protein	321	10	0.0	72.4%	2	F:transferase activity, transferring phosphorus-containing groups; P:tRNA splicing, via endonucleolytic cleavage and ligation	-
g1104	scaffold00002	---NA---	445	0			0	-
g11040	scaffold00029	hypothetical protein PFICI_08175	411	10	1.16982e-172	58.5%	0	-
g11041	scaffold00029	---NA---	252	0			0	-
g11042	scaffold00029	wd tetratricopeptide repeat domain-containing protein	588	10	0.0	82.7%	0	-
g11043	scaffold00029	---NA---	165	0			0	-
g11044	scaffold00029	hypothetical protein V491_06590	134	2	0.919668	70.5%	0	-
g11045	scaffold00029	ph-response transcription factor pacc rim101	572	10	0.0	73.9%	0	-
g11046	scaffold00029	---NA---	334	0			0	-
g11047	scaffold00029	type 2a phosphatase activator tip41	741	10	0.0	81.6%	0	-
g11048	scaffold00029	atp-dependent rna helicase protein	600	10	0.0	57.7%	0	-
g11049	scaffold00029	atp-dependent rna helicase mrh-4	605	10	0.0	79.6%	4	F:ATP-dependent helicase activity; F:RNA binding; F:ATP binding; C:mitochondrion	-
g1105	scaffold00002	fad dependent oxidoreductase	479	10	0.0	78.5%	0	-
g11050	scaffold00029	---NA---	398	0			0	-
g11051	scaffold00029	pyridoxal-dependent decarboxylase domain protein	1086	10	0.0	75.2%	0	-
g11052	scaffold00029	---NA---	532	0			0	-
g11053	scaffold00029	p-loop containing nucleoside triphosphate hydrolase protein	388	10	0.0	59.2%	0	-
g11054	scaffold00029	hypothetical protein PFICI_08153	464	10	0.0	59.7%	0	-
g11055	scaffold00029	hypothetical protein PFICI_08152	309	10	3.825e-97	54.3%	0	-
g11056	scaffold00029	phosphoglycerate mutase	308	10	4.10423e-169	68.3%	0	-
g11057	scaffold00029	---NA---	248	0			0	-
g11058	scaffold00029	---NA---	362	0			0	-
g11059	scaffold00029	hypothetical protein PFICI_08150	337	1	1.26607e-25	52.0%	0	-
g1106	scaffold00002	integral membrane protein	377	10	9.59232e-148	67.1%	0	-
g11060	scaffold00029	serine threonine-protein kinase ppk6	1236	10	0.0	77.2%	0	-
g11061	scaffold00029	---NA---	768	0			0	-
g11062	scaffold00029	histone-lysine n-methyltransferase	874	10	0.0	75.5%	7	P:regulation of transcription, DNA-dependent; P:DNA-dependent transcription, elongation; F:DNA binding; F:histone methyltransferase activity (H3-K36 specific); P:histone H3-K36 methylation; C:chromosome; C:nucleus	-
g11063	scaffold00029	---NA---	553	0			0	-
g11064	scaffold00029	hypothetical protein PFICI_08147	342	10	0.0	54.4%	1	F:DNA binding	-
g11065	scaffold00029	hypothetical protein V502_09915, partial	246	6	5.92387e-15	53.17%	0	-
g11066	scaffold00029	wd repeat domain-containing protein	727	10	0.0	76.6%	0	-
g11067	scaffold00029	---NA---	504	0			0	-
g11068	scaffold00029	3-hydroxybenzoate 6-hydroxylase	439	10	0.0	65.9%	0	-
g11069	scaffold00029	---NA---	167	0			0	-
g1107	scaffold00002	hypothetical protein PFICI_08695	168	2	1.96263e-22	58.0%	0	-
g11070	scaffold00029	opt family small oligopeptide transporter	837	10	0.0	85.3%	0	-
g11071	scaffold00029	---NA---	179	0			0	-
g11072	scaffold00029	3-oxoacyl- protein	743	10	0.0	76.1%	2	P:fatty acid biosynthetic process; F:transferase activity, transferring acyl groups other than amino-acyl groups	-
g11073	scaffold00029	---NA---	179	0			0	-
g11074	scaffold00029	---NA---	231	0			0	-
g11075	scaffold00029	hypothetical protein VE04_09944	320	1	2.34742e-06	61.0%	0	-
g11076	scaffold00029	6-phosphogluconolactonase	260	10	0.0	89.6%	2	P:pentose-phosphate shunt; F:6-phosphogluconolactonase activity	EC:3.1.1.31
g11077	scaffold00029	4-nitrophenylphosphatase protein	306	10	0.0	88.7%	2	P:dephosphorylation; F:phosphatase activity	-
g11078	scaffold00029	---NA---	395	0			0	-
g11079	scaffold00029	ribonucleoside-diphosphate reductase large subunit	327	10	0.0	77.5%	0	-
g1108	scaffold00002	glycoside hydrolase family 43	485	10	0.0	87.0%	2	P:carbohydrate metabolic process; F:hydrolase activity, hydrolyzing O-glycosyl compounds	-
g11080	scaffold00029	multidrug resistance protein fnx1	907	10	0.0	74.5%	3	P:transmembrane transport; C:integral to membrane; F:transporter activity	-
g11081	scaffold00029	dihydrofolate reductase	643	10	3.02952e-100	75.8%	0	-
g11082	scaffold00029	---NA---	200	0			0	-
g11083	scaffold00029	hypothetical protein PFICI_08131	706	10	0.0	46.1%	0	-
g11084	scaffold00029	---NA---	91	0			0	-
g11085	scaffold00029	---NA---	274	0			0	-
g11086	scaffold00029	hypothetical protein PFICI_08130	553	10	0.0	59.4%	0	-
g11087	scaffold00029	tbc domain-containing protein	1694	10	0.0	69.7%	0	-
g11088	scaffold00029	---NA---	348	0			0	-
g11089	scaffold00029	nadh pyrophosphatase protein	676	10	0.0	81.2%	0	-
g1109	scaffold00002	---NA---	245	0			0	-
g11090	scaffold00029	60s ribosomal protein l10a	217	10	4.59126e-150	97.1%	0	-
g11091	scaffold00029	integral membrane protein	538	10	0.0	63.5%	0	-
g11092	scaffold00029	---NA---	194	0			0	-
g11093	scaffold00029	---NA---	251	0			0	-
g11094	scaffold00029	zinc finger domain-containing protein	527	10	0.0	66.0%	0	-
g11095	scaffold00029	c6 transcription factor	516	10	0.0	52.3%	0	-
g11096	scaffold00029	hypothetical protein PFICI_08123	306	10	6.98534e-173	81.6%	0	-
g11097	scaffold00029	hypothetical protein PFICI_08122	571	10	0.0	56.1%	0	-
g11098	scaffold00029	---NA---	1334	0			0	-
g11099	scaffold00029	amine flavin-containing superfamily protein	501	10	0.0	66.1%	0	-
g111	scaffold00001	---NA---	118	0			0	-
g1110	scaffold00002	hypothetical protein PFICI_00558	837	10	0.0	60.2%	0	-
g11100	scaffold00029	fungal zn binuclear cluster domain containing protein	751	10	0.0	69.3%	5	F:sequence-specific DNA binding RNA polymerase II transcription factor activity; P:regulation of transcription from RNA polymerase II promoter; C:nucleus; F:zinc ion binding; P:transcription from RNA polymerase II promoter	-
g11101	scaffold00029	---NA---	161	0			0	-
g11102	scaffold00030	atp-dependent protease la domain-containing protein	580	10	0.0	68.6%	3	F:ATP-dependent peptidase activity; P:proteolysis; F:zinc ion binding	-
g11103	scaffold00030	hypothetical protein PFICI_11541	754	10	0.0	56.7%	0	-
g11104	scaffold00030	---NA---	103	0			0	-
g11105	scaffold00030	hypothetical protein PFICI_11542	218	10	1.07777e-131	82.9%	0	-
g11106	scaffold00030	yeats family protein	320	10	1.07583e-175	73.0%	3	C:nucleus; F:zinc ion binding; P:regulation of transcription, DNA-dependent	-
g11107	scaffold00030	---NA---	558	0			0	-
g11108	scaffold00030	---NA---	181	0			0	-
g11109	scaffold00030	dna damage protein	1037	10	0.0	49.8%	0	-
g1111	scaffold00002	---NA---	486	0			0	-
g11110	scaffold00030	hypothetical protein PFICI_11546	349	10	0.0	77.4%	0	-
g11111	scaffold00030	hypothetical protein FGSG_12873	354	1	0.00308011	56.0%	0	-
g11112	scaffold00030	---NA---	319	0			0	-
g11113	scaffold00030	like protein	156	10	1.86381e-74	76.4%	0	-
g11114	scaffold00030	catechol o-methyltransferase	227	10	9.08407e-109	77.2%	0	-
g11115	scaffold00030	phosphotransferase enzyme family protein	439	10	0.0	64.0%	0	-
g11116	scaffold00030	---NA---	66	0			0	-
g11117	scaffold00030	signal recognition particle protein	853	10	0.0	92.9%	6	C:signal recognition particle; F:7S RNA binding; P:GTP catabolic process; F:GTPase activity; P:SRP-dependent cotranslational protein targeting to membrane; F:GTP binding	-
g11118	scaffold00030	branched-chain amino acid aminotransferase 4-amino-4-deoxychorismate lyase	279	1	2.2786	40.0%	3	F:transferase activity; F:lyase activity; F:transaminase activity
g11119	scaffold00030	glycoside hydrolase family 5 protein	325	10	0.0	84.9%	4	F:cellulase activity; F:cellulose binding; P:cellulose catabolic process; C:extracellular region	EC:3.2.1.4
g1112	scaffold00002	trna1 (adenine -n6)-methyltransferase	421	10	5.62932e-143	66.5%	0	-
g11120	scaffold00030	heterokaryon incompatibility protein or allele	413	10	1.65098e-65	53.1%	0	-
g11121	scaffold00030	integral membrane protein	385	10	0.0	65.4%	1	C:integral to membrane	-
g11122	scaffold00030	---NA---	323	0			0	-
g11123	scaffold00030	glycoside hydrolase family 31 protein	977	10	0.0	76.7%	0	-
g11124	scaffold00030	uncharacterized protein FMAN_14317	1055	10	1.33627e-14	51.8%	3	F:RNA binding; P:RNA processing; F:ribonuclease III activity	EC:3.1.26.3
g11125	scaffold00030	endonuclease exonuclease phosphatase family protein	393	10	1.21212e-63	55.1%	2	F:endonuclease activity; F:exonuclease activity	-
g11126	scaffold00030	glycolipid 2-alpha-mannosyltransferase	425	10	0.0	76.4%	3	C:membrane; F:mannosyltransferase activity; P:protein glycosylation	EC:2.4.1
g11127	scaffold00030	glycosyl transferase	378	10	0.0	68.7%	0	-
g11128	scaffold00030	ankyrin and het domain-containing protein	588	10	0.0	47.3%	0	-
g11129	scaffold00030	hypothetical protein PFICI_11565	332	10	8.77606e-34	45.0%	0	-
g1113	scaffold00002	aspartic-type endopeptidase	538	10	0.0	66.2%	0	-
g11130	scaffold00030	cytochrome p450	917	10	0.0	67.6%	6	F:heme binding; F:oxidoreductase activity, acting on paired donors, with incorporation or reduction of molecular oxygen; F:monooxygenase activity; F:iron ion binding; F:electron carrier activity; P:oxidation-reduction process	-
g11131	scaffold00030	pantothenate transporter	513	10	0.0	90.7%	2	P:transmembrane transport; C:integral to membrane	-
g11132	scaffold00030	dihydroxyhept-2-ene- -dioic acid aldolase	266	10	0.0	96.2%	2	P:cellular aromatic compound metabolic process; F:carbon-carbon lyase activity	-
g11133	scaffold00030	---NA---	284	0			0	-
g11134	scaffold00030	yer057p uk114 family	125	10	9.36205e-71	90.9%	0	-
g11135	scaffold00030	gibberellin 3-beta hydroxylase	427	10	0.0	88.4%	3	P:oxidation-reduction process; F:iron ion binding; F:oxidoreductase activity, acting on paired donors, with incorporation or reduction of molecular oxygen, 2-oxoglutarate as one donor, and incorporation of one atom each of oxygen into both donors	EC:1.14.11
g11136	scaffold00030	---NA---	335	0			0	-
g11137	scaffold00030	blue (type 1) copper domain	709	10	0.0	71.6%	4	P:transcription, DNA-dependent; F:DNA binding; C:nucleus; F:zinc ion binding	-
g11138	scaffold00030	---NA---	804	0			0	-
g11139	scaffold00030	---NA---	357	0			0	-
g1114	scaffold00002	saccharopine dehydrogenase	329	10	0.0	72.6%	2	P:oxidation-reduction process; F:oxidoreductase activity	-
g11140	scaffold00030	dihydroxybenzoate decarboxylase	336	10	0.0	93.2%	2	F:catalytic activity; P:metabolic process	-
g11141	scaffold00030	fungal specific transcription factor	144	10	4.82694e-89	72.2%	0	-
g11142	scaffold00030	alpha beta hydrolase fold family protein	268	10	5.63861e-158	69.9%	1	F:hydrolase activity	-
g11143	scaffold00030	caib baif family enzyme	560	10	0.0	83.5%	2	F:catalytic activity; P:metabolic process	-
g11144	scaffold00030	---NA---	141	0			0	-
g11145	scaffold00030	catechol dioxygenase	295	10	0.0	85.0%	4	F:catechol 1,2-dioxygenase activity; F:ferric iron binding; P:catechol-containing compound metabolic process; P:oxidation-reduction process	EC:1.13.11.1
g11146	scaffold00030	hypothetical protein BN1723_013010	195	2	1.19559	53.0%	0	-
g11147	scaffold00030	splicing factor 3a subunit 3 protein	1215	10	0.0	84.3%	3	F:nucleic acid binding; C:nucleus; F:zinc ion binding	-
g11148	scaffold00030	eukaryotic initiation factor 4a-12	400	10	0.0	99.3%	6	F:translation initiation factor activity; P:translational initiation; C:nucleolus; P:rRNA processing; F:ATP-dependent helicase activity; F:ATP binding	-
g11149	scaffold00030	duf1446-domain-containing protein	926	10	0.0	73.9%	0	-
g1115	scaffold00002	hypothetical protein FOCG_00094	509	10	0.0	77.7%	0	-
g11150	scaffold00030	---NA---	249	0			0	-
g11151	scaffold00030	hypothetical protein PFICI_11581	358	10	0.0	49.0%	0	-
g11152	scaffold00030	---NA---	257	0			0	-
g11153	scaffold00030	zinc-binding dehydrogenase	338	10	0.0	78.9%	0	-
g11154	scaffold00030	---NA---	289	0			0	-
g11155	scaffold00030	oligomeric golgi complex subunit 2 protein	293	10	1.15346e-152	73.6%	3	P:protein transport; C:membrane; P:Golgi organization	-
g11156	scaffold00030	hypothetical protein PFICI_11585	697	4	3.37678e-63	48.0%	0	-
g11157	scaffold00030	bzip transcription factor protein	882	10	0.0	65.8%	0	-
g11158	scaffold00030	hypothetical protein PFICI_11586	249	10	2.7782e-154	73.9%	0	-
g11159	scaffold00030	hypothetical protein V502_03193	235	2	0.0809519	50.5%	0	-
g1116	scaffold00002	---NA---	217	0			0	-
g11160	scaffold00030	3-dehydroshikimate dehydratase	505	10	1.55584e-99	64.0%	2	F:isomerase activity; F:oxidoreductase activity, acting on single donors with incorporation of molecular oxygen, incorporation of two atoms of oxygen	EC:1.13.11
g11161	scaffold00030	---NA---	696	0			0	-
g11162	scaffold00030	hypothetical protein CSAL01_08473	405	10	7.09433e-17	42.6%	0	-
g11163	scaffold00030	---NA---	103	0			0	-
g11164	scaffold00030	p-loop containing nucleoside triphosphate hydrolase protein	825	10	3.94541e-132	52.1%	0	-
g11165	scaffold00030	hypothetical protein V491_00165	389	10	8.24316e-75	42.9%	0	-
g11166	scaffold00030	fad binding domain-containing protein	434	10	0.0	65.2%	2	P:oxidation-reduction process; F:monooxygenase activity	-
g11167	scaffold00030	---NA---	213	0			0	-
g11168	scaffold00030	conserved hypothetical protein	157	10	1.15934e-80	82.8%	0	-
g11169	scaffold00030	conserved hypothetical protein	289	10	3.61637e-119	66.9%	0	-
g1117	scaffold00002	hypothetical protein FOVG_15435	385	10	2.19888e-160	74.3%	0	-
g11170	scaffold00030	hypothetical protein EPUS_09496	360	10	2.11571e-146	73.8%	0	-
g11171	scaffold00030	o-methyltransferase 12	415	10	0.0	80.0%	2	F:O-methyltransferase activity; P:methylation	EC:2.1.1
g11172	scaffold00030	---NA---	357	0			0	-
g11173	scaffold00030	cytochrome p450 alkane hydroxylase protein	527	10	0.0	62.5%	5	F:heme binding; F:oxidoreductase activity, acting on paired donors, with incorporation or reduction of molecular oxygen, reduced flavin or flavoprotein as one donor, and incorporation of one atom of oxygen; F:iron ion binding; F:electron carrier activity; P:oxidation-reduction process	EC:1.14.14
g11174	scaffold00030	---NA---	275	0			0	-
g11175	scaffold00030	hydroxyindole o- protein	70	1	6.69554e-11	71.0%	0	-
g11176	scaffold00030	hypothetical protein ST47_g9362	201	10	3.4732e-55	54.1%	0	-
g11177	scaffold00030	---NA---	151	0			0	-
g11178	scaffold00030	---NA---	361	0			0	-
g11179	scaffold00030	hypothetical protein PFICI_14220	469	10	0.0	58.3%	0	-
g1118	scaffold00002	short chain dehydrogenase	336	10	3.05846e-113	67.8%	2	P:oxidation-reduction process; F:oxidoreductase activity	-
g11180	scaffold00030	hypothetical protein PFICI_14220	176	10	3.67982e-26	53.8%	0	-
g11181	scaffold00030	inositol-3-phosphate synthase protein	135	10	1.92442e-63	70.9%	0	-
g11182	scaffold00030	digeranylgeranylglyceryl phosphate synthase	308	10	1.526e-104	61.5%	2	F:prenyltransferase activity; C:integral to membrane	EC:2.5.1
g11183	scaffold00030	integral membrane protein	396	10	5.55886e-101	62.5%	0	-
g11184	scaffold00030	tryprostatin b 6-hydroxylase	401	10	1.55709e-138	60.4%	0	-
g11185	scaffold00030	disulfide-bond oxidoreductase	272	10	4.26413e-144	78.2%	0	-
g11186	scaffold00030	small s protein	948	10	0.0	61.0%	0	-
g11187	scaffold00030	ytp1 protein	515	10	0.0	82.6%	0	-
g11188	scaffold00030	l-lactate dehydrogenase protein	1224	10	0.0	85.6%	3	F:oxidoreductase activity; P:oxidation-reduction process; F:FMN binding	-
g11189	scaffold00030	arabinan endo- -alpha-l-arabinosidase a	726	10	0.0	81.6%	2	P:arabinan catabolic process; F:arabinan endo-1,5-alpha-L-arabinosidase activity	EC:3.2.1.99
g1119	scaffold00002	---NA---	156	0			0	-
g11190	scaffold00030	---NA---	420	0			0	-
g11191	scaffold00030	probable prm10 pheromone-regulated protein	775	10	0.0	68.7%	0	-
g11192	scaffold00030	---NA---	655	0			0	-
g11193	scaffold00030	thioredoxin-like protein	219	10	1.9571e-115	73.4%	1	F:protein disulfide oxidoreductase activity	-
g11194	scaffold00030	gnat family protein	203	10	7.60206e-111	69.5%	0	-
g11195	scaffold00030	hypothetical protein PFICI_03586	717	10	0.0	52.5%	0	-
g11196	scaffold00030	---NA---	403	0			0	-
g11197	scaffold00030	hypothetical protein PFICI_02811	552	10	0.0	60.0%	4	P:metal ion transport; C:membrane; F:metal ion transmembrane transporter activity; P:transmembrane transport	-
g11198	scaffold00030	---NA---	599	0			0	-
g11199	scaffold00030	glycoside hydrolase family 79 protein	605	10	0.0	73.2%	0	-
g112	scaffold00001	cytochrome p450 protein	870	10	0.0	60.4%	0	-
g1120	scaffold00002	---NA---	244	0			0	-
g11200	scaffold00030	lid2 complex component lid2	1832	10	0.0	77.2%	5	F:oxidoreductase activity, acting on paired donors, with incorporation or reduction of molecular oxygen, 2-oxoglutarate as one donor, and incorporation of one atom each of oxygen into both donors; C:nucleus; F:DNA binding; P:oxidation-reduction process; F:zinc ion binding	EC:1.14.11
g11201	scaffold00030	---NA---	745	0			0	-
g11202	scaffold00030	giy-yig catalytic domain-containing protein	326	10	0.0	77.6%	6	F:metal ion binding; C:Slx1-Slx4 complex; P:nucleic acid phosphodiester bond hydrolysis; F:5'-flap endonuclease activity; P:DNA recombination; P:DNA repair	-
g11203	scaffold00030	zn-dependent exopeptidase	367	10	0.0	74.3%	2	F:peptidase activity; P:proteolysis	-
g11204	scaffold00030	hypothetical protein V498_05446	403	1	3.79087e-05	62.0%	0	-
g11205	scaffold00030	---NA---	312	0			0	-
g11206	scaffold00030	copper amine oxidase n-terminal domain protein	358	10	1.84222e-175	65.1%	0	-
g11207	scaffold00030	uncharacterised protein	593	5	0.142983	44.2%	0	-
g11208	scaffold00030	glutamyl-trna synthetase	629	10	0.0	88.5%	4	C:cytoplasm; F:glutamate-tRNA ligase activity; P:glutamyl-tRNA aminoacylation; F:ATP binding	EC:6.1.1.17
g11209	scaffold00030	50s ribosomal protein l1	312	10	0.0	74.7%	4	F:structural constituent of ribosome; F:RNA binding; C:large ribosomal subunit; P:translation	-
g1121	scaffold00002	---NA---	207	0			0	-
g11210	scaffold00030	---NA---	245	0			0	-
g11211	scaffold00030	---NA---	147	0			0	-
g11212	scaffold00030	hypothetical protein PFICI_11613	819	10	0.0	45.0%	0	-
g11213	scaffold00030	hypothetical protein PFICI_11614	600	10	0.0	74.1%	0	-
g11214	scaffold00030	transcription factor cys6 protein	928	10	0.0	60.4%	5	F:sequence-specific DNA binding RNA polymerase II transcription factor activity; P:regulation of transcription from RNA polymerase II promoter; C:nucleus; F:zinc ion binding; P:transcription from RNA polymerase II promoter	-
g11215	scaffold00030	hypothetical protein PFICI_11616	305	10	7.55489e-93	53.8%	0	-
g11216	scaffold00030	nad -binding protein	288	10	0.0	82.7%	2	P:oxidation-reduction process; F:oxidoreductase activity	-
g11217	scaffold00030	hypothetical protein T07_9554, partial	189	1	1.63017	64.0%	0	-
g11218	scaffold00030	peroxiredoxin type-2	167	10	8.94632e-111	80.2%	2	P:oxidation-reduction process; F:oxidoreductase activity	-
g11219	scaffold00030	hypothetical protein PFICI_11620	1718	10	0.0	77.4%	0	-
g1122	scaffold00002	---NA---	97	0			0	-
g11220	scaffold00030	---NA---	668	0			0	-
g11221	scaffold00030	---NA---	309	0			0	-
g11222	scaffold00030	fungal cellulose binding domain-containing protein	772	10	1.12421e-157	80.9%	0	-
g11223	scaffold00030	hypothetical protein PFICI_11629	325	10	9.15762e-39	52.0%	0	-
g11224	scaffold00030	pre-mrna splicing factor rna helicase protein	1252	10	0.0	58.5%	3	F:nucleic acid binding; F:ATP binding; F:ATP-dependent helicase activity	-
g11225	scaffold00030	---NA---	314	0			0	-
g11226	scaffold00030	hypothetical protein PFICI_11624	143	5	6.53683e-40	53.2%	0	-
g11227	scaffold00030	nad -binding partial	331	10	3.49158e-162	62.2%	0	-
g11228	scaffold00030	---NA---	173	0			0	-
g11229	scaffold00030	hypothetical protein PFICI_11626	428	10	0.0	68.5%	0	-
g1123	scaffold00002	hypothetical protein FOXB_05815	82	10	5.76129e-25	79.7%	0	-
g11230	scaffold00030	n- gnat protein	224	10	1.66137e-63	67.2%	0	-
g11231	scaffold00030	hypothetical protein PFICI_11629	283	5	8.18462e-30	49.2%	0	-
g11232	scaffold00030	hypothetical protein PFICI_11629	279	8	1.73206e-43	51.0%	0	-
g11233	scaffold00030	hypothetical protein PFICI_05445	244	5	2.51181e-30	49.6%	0	-
g11234	scaffold00030	---NA---	177	0			0	-
g11235	scaffold00030	Uncharacterized protein TOPH_06192	468	10	0.0	75.5%	0	-
g11236	scaffold00030	---NA---	236	0			0	-
g11237	scaffold00030	set domain-containing protein 5 protein	524	10	4.34779e-80	48.2%	1	F:metal ion binding
g11238	scaffold00030	---NA---	155	0			0	-
g11239	scaffold00030	hypothetical protein PFICI_11629	296	8	4.24911e-35	49.0%	0	-
g1124	scaffold00002	mfs general substrate transporter	546	10	0.0	77.0%	0	-
g11240	scaffold00030	integral membrane protein	331	10	0.0	57.8%	0	-
g11241	scaffold00030	---NA---	222	0			0	-
g11242	scaffold00030	mfs transporter	515	10	0.0	70.9%	2	P:transmembrane transport; C:integral to membrane	-
g11243	scaffold00030	hypothetical protein SPBR_06469	492	1	17.4529	41.0%	0	-
g11244	scaffold00030	o-methyltransferase	381	10	0.0	62.7%	2	F:catechol O-methyltransferase activity; P:methylation	EC:2.1.1.6
g11245	scaffold00030	---NA---	428	0			0	-
g11246	scaffold00030	para-nitrobenzyl esterase	523	10	0.0	61.5%	1	F:cholinesterase activity	EC:3.1.1.8
g11247	scaffold00030	hypothetical protein PFICI_14022	196	2	0.000538129	43.5%	0	-
g11248	scaffold00030	hypothetical protein PFICI_08495	136	3	0.0017998	49.67%	0	-
g11249	scaffold00030	hypothetical protein PFICI_14022	187	2	5.63667e-06	48.5%	0	-
g1125	scaffold00002	amino acid transporter protein	325	10	7.78089e-170	68.3%	0	-
g11250	scaffold00030	---NA---	178	0			0	-
g11251	scaffold00030	---NA---	190	0			0	-
g11252	scaffold00030	hypothetical protein PFICI_09683	133	6	3.08928e-82	76.67%	0	-
g11253	scaffold00030	hypothetical protein FLAG1_09658	333	8	8.25067e-115	72.63%	0	-
g11254	scaffold00030	hypothetical protein PFICI_09012	621	10	0.0	83.1%	2	P:carbohydrate metabolic process; F:hydrolase activity, hydrolyzing O-glycosyl compounds	-
g11255	scaffold00030	---NA---	719	0			0	-
g11256	scaffold00030	hypothetical protein PFICI_11677	348	10	2.03238e-108	57.9%	0	-
g11257	scaffold00030	hypothetical protein PFICI_11676	2599	2	0.0	53.0%	0	-
g11258	scaffold00030	---NA---	445	0			0	-
g11259	scaffold00030	---NA---	1007	0			0	-
g1126	scaffold00002	---NA---	243	0			0	-
g11260	scaffold00030	rhamnogalacturonase a	546	10	0.0	80.0%	2	F:polygalacturonase activity; P:carbohydrate metabolic process	EC:3.2.1.15
g11261	scaffold00030	ferric reductase like transmembrane component	1395	10	0.0	67.2%	0	-
g11262	scaffold00030	mfs transporter protein	1033	10	0.0	84.9%	0	-
g11263	scaffold00030	fad dependent oxidoreductase	442	10	0.0	72.7%	0	-
g11264	scaffold00030	---NA---	274	0			0	-
g11265	scaffold00030	hypothetical protein PFICI_11671	714	10	7.57449e-76	43.4%	1	P:signal transduction
g11266	scaffold00030	---NA---	279	0			0	-
g11267	scaffold00030	4-coumarate- ligase	545	10	0.0	78.6%	0	-
g11268	scaffold00030	---NA---	97	0			0	-
g11269	scaffold00030	---NA---	153	0			0	-
g1127	scaffold00002	hypothetical protein CGGC5_12214	394	10	2.78187e-124	70.6%	0	-
g11270	scaffold00030	duf218 domain-containing protein	251	10	4.39273e-119	73.2%	0	-
g11271	scaffold00030	alpha beta-hydrolase	260	10	8.79054e-154	65.3%	0	-
g11272	scaffold00030	cation-transporting atpase 4 protein	373	10	0.0	66.6%	0	-
g11273	scaffold00030	---NA---	223	0			0	-
g11274	scaffold00030	nadh-ubiquinone oxidoreductase subunit	138	10	5.60392e-86	83.4%	0	-
g11275	scaffold00030	cdp-diacylglycerol-glycerol-3-phosphate 3-phosphatidyltransferase	495	10	0.0	87.8%	0	-
g11276	scaffold00030	endoglucanase 1	851	10	0.0	85.0%	2	F:cellulase activity; P:cellulose catabolic process	EC:3.2.1.4
g11277	scaffold00030	hypothetical protein PFICI_11663	505	10	1.73524e-84	90.8%	0	-
g11278	scaffold00030	set domain-containing protein	333	10	0.0	72.3%	0	-
g11279	scaffold00030	alpha beta-hydrolase	403	10	0.0	68.8%	0	-
g1128	scaffold00002	related to dha14-like major facilitator efflux transporter (mfs transporter)	900	10	0.0	82.7%	2	P:transmembrane transport; C:integral to membrane	-
g11280	scaffold00030	fungal specific transcription factor domain-containing protein	751	10	0.0	62.0%	7	C:protein kinase CK2 complex; P:regulation of protein kinase activity; F:zinc ion binding; F:DNA binding; P:transcription, DNA-dependent; C:nucleus; F:protein kinase regulator activity	-
g11281	scaffold00030	fumarylacetoacetase	437	10	0.0	79.7%	2	F:fumarylacetoacetase activity; P:aromatic amino acid family metabolic process	EC:3.7.1.2
g11282	scaffold00030	---NA---	129	0			0	-
g11283	scaffold00030	homogentisate -dioxygenase	472	10	0.0	86.6%	0	-
g11284	scaffold00030	uncharacterised protein	216	1	13.7965	53.0%	0	-
g11285	scaffold00030	amino acid permease	490	10	0.0	72.6%	0	-
g11286	scaffold00030	---NA---	176	0			0	-
g11287	scaffold00030	cytochrome p450	913	10	0.0	87.6%	0	-
g11288	scaffold00030	---NA---	103	0			0	-
g11289	scaffold00030	aldehyde dehydrogenase	493	10	0.0	83.7%	2	F:oxidoreductase activity, acting on the aldehyde or oxo group of donors, NAD or NADP as acceptor; P:oxidation-reduction process	-
g1129	scaffold00002	hypothetical protein PFICI_03183	296	10	3.26766e-103	52.4%	0	-
g11290	scaffold00030	stress responsive a b barrel domain-containing protein	108	10	3.8892e-62	83.7%	0	-
g11291	scaffold00030	---NA---	335	0			0	-
g11292	scaffold00030	---NA---	328	0			0	-
g11293	scaffold00030	hypothetical protein PFICI_11659	398	10	0.0	67.3%	3	F:metal ion binding; F:oxidoreductase activity; P:oxidation-reduction process	-
g11294	scaffold00030	nad transhydrogenase	1107	10	0.0	88.2%	5	C:integral to membrane; F:NAD(P)+ transhydrogenase (AB-specific) activity; P:oxidation-reduction process; P:proton transport; F:NADP binding	EC:1.6.1.2
g11295	scaffold00030	uncharacterised protein	352	5	0.00845904	53.2%	0	-
g11296	scaffold00030	---NA---	357	0			0	-
g11297	scaffold00030	integral membrane protein	277	10	3.77248e-129	62.4%	0	-
g11298	scaffold00030	---NA---	214	0			0	-
g11299	scaffold00030	---NA---	120	0			0	-
g113	scaffold00001	hypothetical protein PFICI_10069	211	10	3.07703e-128	59.8%	0	-
g1130	scaffold00002	---NA---	116	0			0	-
g11300	scaffold00030	biotrophy-associated secreted protein 2	105	10	1.27592e-59	75.5%	3	F:molecular_function; P:biological_process; C:cellular_component
g11301	scaffold00030	c6 zinc finger domain-containing protein	692	10	0.0	64.7%	0	-
g11302	scaffold00030	nad dependent epimerase dehydratase family protein	1102	10	8.63301e-123	64.8%	0	-
g11303	scaffold00030	dienelactone hydrolase family protein	261	10	3.96483e-151	71.1%	1	F:hydrolase activity	-
g11304	scaffold00030	sir2 family protein	298	10	0.0	76.4%	0	-
g11305	scaffold00030	protocatechuate -dioxygenase beta subunit protein	323	10	0.0	82.6%	0	-
g11306	scaffold00030	parasitic phase-specific protein psp-1	305	10	0.0	75.4%	0	-
g11307	scaffold00030	---NA---	200	0			0	-
g11308	scaffold00030	hypothetical protein SPSK_05813	216	1	0.0131197	58.0%	0	-
g11309	scaffold00030	atp-dependent bile acid permease	1704	10	0.0	83.1%	0	-
g1131	scaffold00002	ring finger protein	362	10	3.214e-163	54.4%	1	F:zinc ion binding	-
g11310	scaffold00030	hypothetical protein SPSK_05813	320	1	9.96525e-25	47.0%	0	-
g11311	scaffold00030	c6 transcription protein	921	10	0.0	56.5%	6	P:regulation of transcription, DNA-dependent; P:transcription from RNA polymerase II promoter; F:sequence-specific DNA binding RNA polymerase II transcription factor activity; F:zinc ion binding; P:regulation of transcription from RNA polymerase II promoter; C:nucleus
g11312	scaffold00030	flavin-containing monooxygenase-like protein	569	10	0.0	66.0%	4	F:flavin adenine dinucleotide binding; F:N,N-dimethylaniline monooxygenase activity; P:oxidation-reduction process; F:NADP binding	EC:1.14.13.8
g11313	scaffold00030	---NA---	387	0			0	-
g11314	scaffold00030	acyl- ligase protein	1808	10	0.0	85.7%	0	-
g11315	scaffold00030	hypothetical protein BN1723_010936	1060	1	0.135786	65.0%	0	-
g11316	scaffold00030	hypothetical protein PFICI_11645	983	10	0.0	44.5%	0	-
g11317	scaffold00030	---NA---	220	0			0	-
g11318	scaffold00030	cyclic-amp class- partial	392	10	0.0	72.0%	2	F:3',5'-cyclic-AMP phosphodiesterase activity; P:cAMP catabolic process	EC:3.1.4
g11319	scaffold00030	---NA---	154	0			0	-
g1132	scaffold00002	---NA---	155	0			0	-
g11320	scaffold00030	hypothetical protein V490_07515	113	10	5.27374e-23	49.9%	0	-
g11321	scaffold00030	---NA---	363	0			0	-
g11322	scaffold00030	nuclease pa3	337	10	0.0	83.8%	4	F:endonuclease activity; P:DNA catabolic process; F:nucleic acid binding; F:3'-nucleotidase activity	EC:3.1.3.6
g11323	scaffold00030	gdsl esterase lipase protein	228	10	2.71232e-89	50.0%	0	-
g11324	scaffold00030	---NA---	193	0			0	-
g11325	scaffold00030	acyl- dehydrogenase domain-containing protein	429	10	0.0	85.0%	0	-
g11326	scaffold00030	---NA---	177	0			0	-
g11327	scaffold00030	hypothetical protein PFICI_11640	708	1	0.00844531	57.0%	0	-
g11328	scaffold00031	hypothetical protein EPH_0053290	224	2	0.0882829	96.5%	0	-
g11329	scaffold00031	heterokaryon incompatibility protein	673	10	0.0	53.6%	0	-
g1133	scaffold00002	acid proteinase protein	262	10	8.24699e-157	76.5%	2	F:aspartic-type endopeptidase activity; P:proteolysis	EC:3.4.23
g11330	scaffold00031	dna mismatch repair protein msh-2 protein	505	10	0.0	60.3%	1	C:cellular_component
g11331	scaffold00031	dna-binding wrky domain-containing protein	876	10	0.0	70.8%	0	-
g11332	scaffold00031	multiprotein bridging factor 1	155	10	7.94043e-69	77.4%	0	-
g11333	scaffold00031	carbohydrate-binding module family 32	662	10	0.0	72.7%	0	-
g11334	scaffold00031	---NA---	509	0			0	-
g11335	scaffold00031	glutathione-dependent formaldehyde-activating enzyme	135	10	3.16507e-84	89.1%	2	F:carbon-sulfur lyase activity; P:metabolic process	-
g11336	scaffold00031	hypothetical protein BN1723_004981	110	1	4.0535e-10	77.0%	0	-
g11337	scaffold00031	collagen-like protein mcl1	247	10	1.62346e-96	62.7%	0	-
g11338	scaffold00031	---NA---	517	0			0	-
g11339	scaffold00031	pectin lyase-like protein	393	10	0.0	84.2%	0	-
g1134	scaffold00002	---NA---	85	0			0	-
g11340	scaffold00031	agmatinase 1	393	10	0.0	92.2%	0	-
g11341	scaffold00031	hypothetical protein ESA_00404	272	1	4.66374	43.0%	0	-
g11342	scaffold00031	hypothetical protein PFICI_13368	1122	10	0.0	60.0%	0	-
g11343	scaffold00031	---NA---	156	0			0	-
g11344	scaffold00031	---NA---	96	0			0	-
g11345	scaffold00031	related to u1 small nuclear ribonucleoprotein c	787	10	2.13403e-40	88.2%	8	F:mRNA binding; F:U1 snRNA binding; F:zinc ion binding; P:mRNA 5'-splice site recognition; C:U1 snRNP; P:spliceosomal snRNP assembly; C:U2-type prespliceosome; C:commitment complex	-
g11346	scaffold00031	endoplasmic reticulum vesicle protein 25	214	10	1.2815e-146	85.5%	6	C:Golgi membrane; C:endoplasmic reticulum membrane; C:ER to Golgi transport vesicle; C:integral to membrane; P:ER to Golgi vesicle-mediated transport; P:protein transport	-
g11347	scaffold00031	tpr repeat protein	262	10	4.62125e-125	65.8%	1	C:mitochondrion	-
g11348	scaffold00031	kinetochore protein mis13	495	10	0.0	69.1%	3	C:MIS12/MIND type complex; P:cell division; P:chromosome segregation	-
g11349	scaffold00031	bzip transcription factor	509	10	0.0	74.7%	4	F:sequence-specific DNA binding transcription factor activity; F:sequence-specific DNA binding; C:nucleus; P:regulation of transcription, DNA-dependent	-
g1135	scaffold00002	---NA---	140	0			0	-
g11350	scaffold00031	---NA---	206	0			0	-
g11351	scaffold00031	---NA---	116	0			0	-
g11352	scaffold00031	glutathione s-transferase	343	10	0.0	71.2%	0	-
g11353	scaffold00031	---NA---	278	0			0	-
g11354	scaffold00031	hypothetical protein PFICI_13361	634	1	0.000135104	71.0%	0	-
g11355	scaffold00031	large tegument protein	209	1	0.0233168	42.0%	0	-
g11356	scaffold00031	upf0183 domain containing protein	936	10	0.0	80.3%	0	-
g11357	scaffold00031	kinesin motor domain-containing protein	1204	10	0.0	79.4%	10	F:microtubule motor activity; P:phosphorelay signal transduction system; F:microtubule binding; C:microtubule; P:signal transduction by phosphorylation; F:ATP binding; P:microtubule-based movement; C:kinesin complex; C:membrane; F:phosphorelay sensor kinase activity	EC:2.7.3
g11358	scaffold00031	---NA---	400	0			0	-
g11359	scaffold00031	duf52 domain-containing protein	1016	10	0.0	72.7%	0	-
g1136	scaffold00002	hypothetical protein IQ06DRAFT_297305	398	10	4.31162e-57	50.7%	1	P:regulation of transcription, DNA-dependent	-
g11360	scaffold00031	formation of crista junctions protein 1	1893	10	0.0	77.7%	2	C:mitochondrial inner membrane; C:integral to membrane	-
g11361	scaffold00031	phosphatidylinositol class p	252	10	1.22975e-122	79.7%	0	-
g11362	scaffold00031	---NA---	402	0			0	-
g11363	scaffold00031	gtp-binding protein ypt5	221	10	2.82005e-143	92.8%	3	F:GTP binding; P:small GTPase mediated signal transduction; P:protein transport	-
g11364	scaffold00031	phosphoinositide phosphatase protein	701	10	0.0	85.8%	1	F:phosphoric ester hydrolase activity	EC:3.1
g11365	scaffold00031	hypothetical protein SPSK_01499	553	1	1.29424e-33	56.0%	0	-
g11366	scaffold00031	upf0183 domain containing protein	1247	10	0.0	60.1%	0	-
g11367	scaffold00031	d-serine dehydratase-like protein	473	10	0.0	72.2%	0	-
g11368	scaffold00031	---NA---	212	0			0	-
g11369	scaffold00031	---NA---	85	0			0	-
g1137	scaffold00002	heterokaryon incompatibility	383	3	2.36077e-28	50.33%	0	-
g11370	scaffold00031	protein rtoa-like	676	2	1.59791	75.5%	0	-
g11371	scaffold00031	transcription initiation factor tfiid subunit 1	1152	10	0.0	66.3%	3	F:zinc ion binding; P:translational initiation; F:translation initiation factor activity	-
g11372	scaffold00031	---NA---	209	0			0	-
g11373	scaffold00031	mads-box mef2 type transcription factor	637	10	0.0	66.4%	5	P:transcription, DNA-dependent; F:DNA binding; F:protein dimerization activity; C:nucleus; P:regulation of transcription, DNA-dependent	-
g11374	scaffold00031	---NA---	423	0			0	-
g11375	scaffold00031	---NA---	229	0			0	-
g11376	scaffold00031	set domain-containing protein	907	10	0.0	68.9%	0	-
g11377	scaffold00031	---NA---	550	0			0	-
g11378	scaffold00031	morphogenesis protein	1015	10	0.0	75.2%	0	-
g11379	scaffold00031	hypothetical protein BN1723_016097	633	1	8.13101	52.0%	0	-
g1138	scaffold00002	hypothetical protein PFICI_03187	348	2	3.26358e-74	49.0%	0	-
g11380	scaffold00031	---NA---	93	0			0	-
g11381	scaffold00031	---NA---	119	0			0	-
g11382	scaffold00031	---NA---	660	0			0	-
g11383	scaffold00031	uracil-dna glycosylase	373	10	0.0	79.6%	4	P:base-excision repair; C:nucleus; F:uracil DNA N-glycosylase activity; C:mitochondrion	EC:3.2.2
g11384	scaffold00031	solute carrier family 25 member 40 protein	450	10	0.0	79.0%	2	P:transport; C:integral to membrane	-
g11385	scaffold00031	f-box domain-containing protein	536	10	0.0	70.9%	0	-
g11386	scaffold00031	---NA---	463	0			0	-
g11387	scaffold00031	hypothetical protein PFICI_06913	799	10	0.0	59.6%	0	-
g11388	scaffold00031	---NA---	148	0			0	-
g11389	scaffold00031	---NA---	106	0			0	-
g1139	scaffold00002	---NA---	226	0			0	-
g11390	scaffold00031	hypothetical protein PFICI_06912	295	10	0.0	72.6%	0	-
g11391	scaffold00031	mboat family protein	241	4	2.14285e-08	57.25%	0	-
g11392	scaffold00031	glycerol:h+ symporter	645	10	0.0	77.8%	0	-
g11393	scaffold00031	alpha beta-hydrolase protein	537	10	0.0	76.7%	1	F:hydrolase activity	-
g11394	scaffold00031	hypothetical protein PFICI_06909	546	10	4.1352e-41	54.6%	0	-
g11395	scaffold00031	hypothetical protein PFICI_06909	217	1	1.07544e-23	49.0%	0	-
g11396	scaffold00031	wd repeat-containing protein slp1	604	10	0.0	88.0%	0	-
g11397	scaffold00031	hypothetical protein O988_05932, partial	411	2	3.56805e-89	61.5%	0	-
g11398	scaffold00031	---NA---	201	0			0	-
g11399	scaffold00031	kelch domain-containing protein	758	10	0.0	86.3%	0	-
g114	scaffold00001	cation-transporting atpase 4	501	10	9.00514e-64	59.7%	0	-
g1140	scaffold00002	male nad-binding partial	1049	10	0.0	68.4%	0	-
g11400	scaffold00031	---NA---	134	0			0	-
g11401	scaffold00031	c2h2 transcription factor protein	684	10	0.0	66.8%	2	F:metal ion binding; F:nucleic acid binding	-
g11402	scaffold00031	---NA---	418	0			0	-
g11403	scaffold00031	---NA---	88	0			0	-
g11404	scaffold00031	---NA---	309	0			0	-
g11405	scaffold00031	mitochondrial hypoxia responsive domain containing protein	246	10	1.16004e-166	85.9%	1	C:integral to membrane	-
g11406	scaffold00031	transcription factor tfiia complex subunit protein	389	10	0.0	61.3%	0	-
g11407	scaffold00031	hypothetical protein PFICI_06903	308	10	1.48201e-163	66.2%	0	-
g11408	scaffold00031	atp synthase subunit g protein	280	10	1.2232e-125	77.4%	3	F:hydrogen ion transmembrane transporter activity; C:mitochondrial proton-transporting ATP synthase complex, coupling factor F(o); P:ATP synthesis coupled proton transport	-
g11409	scaffold00031	---NA---	219	0			0	-
g1141	scaffold00002	like family-domain-containing protein	685	10	0.0	75.6%	0	-
g11410	scaffold00031	hypothetical protein BN1708_005463	249	2	1.69773e-57	57.0%	0	-
g11411	scaffold00031	l-arabinitol 4-dehydrogenase	375	10	0.0	92.0%	0	-
g11412	scaffold00031	galacturan -alpha-galacturonidase c	999	1	4.58106e-07	42.0%	0	-
g11413	scaffold00031	homoaconitase	768	10	0.0	87.4%	0	-
g11414	scaffold00031	efflux pump antibiotic resistance protein	511	10	0.0	78.2%	0	-
g11415	scaffold00031	cysteine synthase 2	1141	10	0.0	80.6%	3	F:cysteine synthase activity; P:cysteine biosynthetic process from serine; F:transferase activity	EC:2.5.1.47
g11416	scaffold00031	duf185-domain-containing protein	969	10	0.0	80.9%	0	-
g11417	scaffold00031	transcription elongation factor s-ii	302	10	0.0	74.5%	8	F:translation elongation factor activity; P:regulation of transcription from RNA polymerase II promoter; F:zinc ion binding; P:translational elongation; F:DNA binding; P:regulation of DNA-dependent transcription, elongation; P:transcription, DNA-dependent; C:nucleus	-
g11418	scaffold00031	hypothetical protein PFICI_06788	285	10	4.41149e-168	50.3%	0	-
g11419	scaffold00031	---NA---	187	0			0	-
g1142	scaffold00002	---NA---	153	0			0	-
g11420	scaffold00031	hypothetical protein V501_04238	581	2	1.11662e-18	52.0%	0	-
g11421	scaffold00031	polygalacturonase 3	506	10	0.0	76.8%	3	C:extracellular region; F:polygalacturonase activity; P:carbohydrate metabolic process	EC:3.2.1.15
g11422	scaffold00031	sso2 protein	416	10	0.0	78.6%	2	C:membrane; P:vesicle-mediated transport	-
g11423	scaffold00031	hypothetical protein BN1723_011709	251	1	5.45324	66.0%	0	-
g11424	scaffold00031	alanyl-trna synthetase	1507	10	0.0	89.7%	5	F:nucleic acid binding; F:alanine-tRNA ligase activity; P:alanyl-tRNA aminoacylation; F:ATP binding; C:cytoplasm	EC:6.1.1.7
g11425	scaffold00031	hypothetical protein PFICI_06792	314	10	5.26956e-120	65.8%	0	-
g11426	scaffold00031	uncharacterised protein	977	10	1.23216e-28	45.7%	0	-
g11427	scaffold00031	hypothetical protein BN1723_015534, partial	1407	1	0.00562439	81.0%	0	-
g11428	scaffold00031	5-formyltetrahydrofolate cyclo-ligase	278	10	4.76911e-162	70.9%	0	-
g11429	scaffold00031	orf21 protein	294	10	4.6211e-76	49.0%	0	-
g1143	scaffold00002	hypothetical protein PFICI_03189	254	1	3.58651e-31	56.0%	0	-
g11430	scaffold00031	domain-containing protein	520	10	0.0	82.5%	0	-
g11431	scaffold00031	nad dependent epimerase dehydratase	300	10	0.0	92.1%	2	P:extracellular polysaccharide biosynthetic process; F:dTDP-4-dehydrorhamnose reductase activity	EC:1.1.1.133
g11432	scaffold00031	squalene synthetase	469	10	0.0	83.3%	9	C:endoplasmic reticulum membrane; F:farnesyl-diphosphate farnesyltransferase activity; F:geranyltranstransferase activity; F:oxidoreductase activity; P:isoprenoid biosynthetic process; F:squalene synthase activity; C:integral to membrane; P:sterol biosynthetic process; P:oxidation-reduction process	EC:2.5.1.21; EC:2.5.1.10
g11433	scaffold00031	---NA---	259	0			0	-
g11434	scaffold00031	subtilisin-like protease	435	10	0.0	77.1%	2	F:serine-type endopeptidase activity; P:proteolysis	EC:3.4.21
g11435	scaffold00031	---NA---	402	0			0	-
g11436	scaffold00031	---NA---	201	0			0	-
g11437	scaffold00031	hypothetical protein PFICI_06800	619	10	0.0	77.7%	0	-
g11438	scaffold00031	---NA---	257	0			0	-
g11439	scaffold00031	gpi mannosyltransferase	817	10	0.0	78.4%	4	P:GPI anchor biosynthetic process; C:integral to membrane; F:transferase activity, transferring hexosyl groups; C:endoplasmic reticulum membrane	-
g1144	scaffold00002	n domain dehydrogenase	225	10	4.01179e-117	70.4%	0	-
g11440	scaffold00031	---NA---	354	0			0	-
g11441	scaffold00031	translin-associated protein x	277	10	0.0	70.1%	0	-
g11442	scaffold00031	serine threonine-protein kinase sky1	609	10	0.0	52.3%	1	F:kinase activity	-
g11443	scaffold00031	---NA---	554	0			0	-
g11444	scaffold00031	abc transporter	1778	10	0.0	67.0%	0	-
g11445	scaffold00031	hypothetical protein PFICI_06805	364	10	1.06155e-121	41.8%	0	-
g11446	scaffold00031	---NA---	134	0			0	-
g11447	scaffold00031	hypothetical protein PFICI_06805	352	10	9.9633e-58	43.4%	0	-
g11448	scaffold00031	nitrosoguanidine resistance protein	440	10	7.89591e-158	72.1%	0	-
g11449	scaffold00031	sterol 24-c-methyltransferase	380	10	0.0	86.9%	5	P:steroid biosynthetic process; C:lipid particle; P:methylation; C:mitochondrial outer membrane; F:sterol 24-C-methyltransferase activity	EC:2.1.1.41
g1145	scaffold00002	hypothetical protein PFICI_03192	1260	10	0.0	69.1%	0	-
g11450	scaffold00031	---NA---	172	0			0	-
g11451	scaffold00031	cytochrome p450	964	10	3.96615e-175	71.7%	6	F:heme binding; F:oxidoreductase activity, acting on paired donors, with incorporation or reduction of molecular oxygen; F:monooxygenase activity; F:iron ion binding; F:electron carrier activity; P:oxidation-reduction process	-
g11452	scaffold00031	fad-binding oxidoreductase	384	10	4.98926e-103	62.8%	0	-
g11453	scaffold00031	short-chain protein	637	10	1.8462e-120	72.6%	2	P:oxidation-reduction process; F:oxidoreductase activity	-
g11454	scaffold00031	oxidoreductase fad-binding protein	630	10	0.0	68.9%	3	F:flavin adenine dinucleotide binding; F:UDP-N-acetylmuramate dehydrogenase activity; P:oxidation-reduction process	EC:1.1.1.158
g11455	scaffold00031	oxidoreductase fad-binding protein	484	10	2.04716e-167	69.8%	3	F:flavin adenine dinucleotide binding; F:UDP-N-acetylmuramate dehydrogenase activity; P:oxidation-reduction process	EC:1.1.1.158
g11456	scaffold00031	nacht domain protein	416	1	0.00200272	41.0%	0	-
g11457	scaffold00031	benzoate 4-monooxygenase cytochrome p450 protein	199	10	2.18341e-75	67.3%	6	F:heme binding; F:oxidoreductase activity, acting on paired donors, with incorporation or reduction of molecular oxygen; F:monooxygenase activity; F:iron ion binding; F:electron carrier activity; P:oxidation-reduction process	-
g11458	scaffold00031	tpr domain-containing protein	1189	10	0.0	53.8%	0	-
g11459	scaffold00031	---NA---	218	0			0	-
g1146	scaffold00002	alpha beta hydrolase fold family protein	453	10	0.0	87.7%	1	F:hydrolase activity	-
g11460	scaffold00031	---NA---	253	0			0	-
g11461	scaffold00031	tpr domain-containing protein	613	10	1.14679e-116	51.6%	2	F:cysteine-type endopeptidase activity; P:proteolysis	EC:3.4.22
g11462	scaffold00031	fad nad -binding domain-containing protein	486	10	0.0	60.0%	0	-
g11463	scaffold00031	hypothetical protein PFICI_06807	340	10	8.08813e-153	62.0%	0	-
g11464	scaffold00031	sterol desaturase	363	10	2.53237e-107	53.0%	6	P:oxidation-reduction process; F:oxidoreductase activity; C:integral to membrane; C:membrane; F:iron ion binding; P:fatty acid biosynthetic process
g11465	scaffold00031	---NA---	194	0			0	-
g11466	scaffold00031	hypothetical protein PFICI_06808	154	3	4.603e-60	67.67%	0	-
g11467	scaffold00031	hypothetical protein PFICI_06810	162	3	5.94138e-21	50.0%	0	-
g11468	scaffold00031	---NA---	104	0			0	-
g11469	scaffold00031	gpr fun34 family protein	281	10	6.6076e-173	78.0%	1	C:membrane	-
g1147	scaffold00002	heterokaryon incompatibility protein or allele	380	10	0.0	62.0%	0	-
g11470	scaffold00031	---NA---	125	0			0	-
g11471	scaffold00031	---NA---	950	0			0	-
g11472	scaffold00031	ras gtpase activating protein	1709	10	0.0	81.8%	4	C:intracellular; F:Ras GTPase activator activity; P:small GTPase mediated signal transduction; P:positive regulation of Ras GTPase activity	-
g11473	scaffold00031	casp8 and fadd-like apoptosis regulator	186	3	5.33546	51.33%	0	-
g11474	scaffold00031	inosine-5 -monophosphate dehydrogenase imd2	544	10	0.0	92.4%	6	P:oxidation-reduction process; F:adenyl nucleotide binding; F:metal ion binding; P:GMP biosynthetic process; C:cytoplasm; F:IMP dehydrogenase activity	EC:1.1.1.205
g11475	scaffold00031	uncharacterised protein	398	3	1.08737e-09	43.33%	0	-
g11476	scaffold00031	---NA---	817	0			0	-
g11477	scaffold00031	pa domain-containing protein	796	10	0.0	80.2%	2	F:peptidase activity; P:proteolysis	-
g11478	scaffold00031	major facilitator superfamily transporter	600	10	0.0	76.1%	2	P:transmembrane transport; C:integral to membrane	-
g11479	scaffold00031	---NA---	137	0			0	-
g1148	scaffold00002	---NA---	194	0			0	-
g11480	scaffold00031	hypothetical protein PFICI_06819	1445	10	0.0	45.9%	0	-
g11481	scaffold00031	---NA---	1416	0			0	-
g11482	scaffold00031	hypothetical protein PFICI_06820	547	10	0.0	48.4%	0	-
g11483	scaffold00031	---NA---	104	0			0	-
g11484	scaffold00031	g2 mitotic-specific cyclin-b1 protein	400	10	0.0	83.8%	1	C:nucleus	-
g11485	scaffold00031	---NA---	302	0			0	-
g11486	scaffold00031	---NA---	468	0			0	-
g11487	scaffold00031	hypothetical protein PFICI_06822	271	10	1.37172e-119	58.2%	0	-
g11488	scaffold00031	anaphase-promoting complex subunit 11	101	10	2.59403e-54	92.0%	0	-
g11489	scaffold00031	thiosulfate sulfurtransferase protein	343	10	0.0	86.9%	0	-
g1149	scaffold00002	lysr family regulatory protein	504	10	3.18589e-120	56.7%	1	F:transferase activity, transferring acyl groups other than amino-acyl groups	-
g11490	scaffold00031	hypothetical protein N332_03381, partial	175	1	0.0978838	50.0%	0	-
g11491	scaffold00031	aael010169- partial	319	10	1.20533e-18	46.3%	0	-
g11492	scaffold00031	40s ribosomal protein s2	309	10	9.59076e-172	79.3%	4	F:structural constituent of ribosome; F:RNA binding; C:small ribosomal subunit; P:translation	-
g11493	scaffold00031	copper radical partial	1374	10	0.0	51.2%	0	-
g11494	scaffold00031	low affinity vacuolar monovalent cation h(+) antiporter	397	5	2.1841e-36	53.6%	0	-
g11495	scaffold00031	pectin lyase	379	10	0.0	85.5%	3	C:extracellular region; P:pectin catabolic process; F:pectin lyase activity	EC:4.2.2.10
g11496	scaffold00031	dead deah box helicase	666	10	7.64604e-37	47.3%	0	-
g11497	scaffold00031	---NA---	462	0			0	-
g11498	scaffold00031	dna polymerase kappa subunit	1401	10	0.0	80.3%	3	F:DNA-directed DNA polymerase activity; F:damaged DNA binding; P:DNA repair	EC:2.7.7.7
g11499	scaffold00031	fk506-binding protein 2	193	10	3.50322e-100	78.5%	4	P:protein folding; C:endoplasmic reticulum lumen; P:protein peptidyl-prolyl isomerization; F:peptidyl-prolyl cis-trans isomerase activity	EC:5.2.1.8
g115	scaffold00001	fad binding domain-containing protein	490	10	0.0	70.8%	3	F:flavin adenine dinucleotide binding; F:UDP-N-acetylmuramate dehydrogenase activity; P:oxidation-reduction process	EC:1.1.1.158
g1150	scaffold00002	cytochrome p450	735	10	3.60654e-167	63.2%	6	F:heme binding; F:oxidoreductase activity, acting on paired donors, with incorporation or reduction of molecular oxygen; F:monooxygenase activity; F:iron ion binding; F:electron carrier activity; P:oxidation-reduction process	-
g11500	scaffold00031	cation transporter	747	10	0.0	68.9%	0	-
g11501	scaffold00031	---NA---	540	0			0	-
g11502	scaffold00031	hypothetical protein PFICI_06833	580	1	7.57332e-39	68.0%	0	-
g11503	scaffold00031	---NA---	101	0			0	-
g11504	scaffold00031	---NA---	413	0			0	-
g11505	scaffold00031	bnr asp-box repeat domain protein	385	10	0.0	66.0%	3	F:molecular_function; P:biological_process; C:cellular_component
g11506	scaffold00031	---NA---	156	0			0	-
g11507	scaffold00031	---NA---	807	0			0	-
g11508	scaffold00031	cytochrome p450	889	10	0.0	74.2%	0	-
g11509	scaffold00031	family c-likeg-protein-coupled receptor protein	339	10	0.0	70.5%	0	-
g1151	scaffold00002	short-chain dehydrogenase	340	10	0.0	78.9%	0	-
g11510	scaffold00031	related to peroxisomal short-chain alcohol dehydrogenase	303	10	0.0	74.8%	2	P:oxidation-reduction process; F:oxidoreductase activity	-
g11511	scaffold00031	---NA---	191	0			0	-
g11512	scaffold00031	udp-galactose transporter like protein	625	10	0.0	60.9%	0	-
g11513	scaffold00031	---NA---	256	0			0	-
g11514	scaffold00031	nuclear movement protein nudc	186	10	8.62066e-102	88.6%	0	-
g11515	scaffold00031	cdk-activating kinase assembly factor mat1	615	10	0.0	67.4%	5	F:kinase activity; P:cell cycle; P:phosphorylation; C:nucleus; F:zinc ion binding	-
g11516	scaffold00031	hypothetical protein PFICI_06842	363	10	2.45704e-73	63.0%	0	-
g11517	scaffold00031	---NA---	432	0			0	-
g11518	scaffold00031	peptide transport protein ptr2	337	10	5.19107e-151	72.5%	0	-
g11519	scaffold00031	anth-domain-containing protein	616	10	0.0	72.0%	4	F:1-phosphatidylinositol binding; C:clathrin coat; F:clathrin binding; P:clathrin coat assembly	-
g1152	scaffold00002	---NA---	104	0			0	-
g11520	scaffold00031	---NA---	170	0			0	-
g11521	scaffold00031	aspartyl-trna synthetase	820	10	0.0	63.1%	4	C:cytoplasm; F:aminoacyl-tRNA ligase activity; F:ATP binding; P:tRNA aminoacylation for protein translation	EC:6.1.1
g11522	scaffold00031	---NA---	132	0			0	-
g11523	scaffold00031	hypothetical protein QT20_00100, partial	377	2	2.0393e-21	57.0%	0	-
g11524	scaffold00031	pyruvate dehydrogenase e1 component beta subunit	378	10	0.0	90.8%	2	F:pyruvate dehydrogenase (acetyl-transferring) activity; P:acetyl-CoA biosynthetic process from pyruvate	EC:1.2.4.1
g11525	scaffold00031	hypothetical protein BN1723_005673	353	1	1.42089e-11	75.0%	0	-
g11526	scaffold00031	sterol 24-c-methyltransferase	382	10	0.0	91.1%	3	P:steroid biosynthetic process; P:methylation; F:sterol 24-C-methyltransferase activity	EC:2.1.1.41
g11527	scaffold00032	---NA---	837	0			0	-
g11528	scaffold00032	cre-clec-85 protein	823	10	1.08097e-125	52.7%	0	-
g11529	scaffold00032	---NA---	216	0			0	-
g1153	scaffold00002	uncharacterized protein FPRN_07147	156	10	3.18409e-62	76.0%	0	-
g11530	scaffold00032	leucine rich repeat family protein	1150	10	0.0	65.1%	0	-
g11531	scaffold00032	---NA---	167	0			0	-
g11532	scaffold00032	fad-dependent oxidoreductase-like enzyme	567	10	0.0	69.3%	0	-
g11533	scaffold00032	acetyl- acetyltransferase	419	10	0.0	89.8%	0	-
g11534	scaffold00032	uncharacterised protein	601	10	7.65192e-07	49.6%	0	-
g11535	scaffold00032	hypothetical protein PFICI_10362	197	2	3.44004e-61	57.5%	0	-
g11536	scaffold00032	hypothetical protein PFICI_10365	803	2	4.77204e-152	71.0%	0	-
g11537	scaffold00032	gmp synthase	273	10	3.95839e-175	60.8%	0	-
g11538	scaffold00032	hypothetical protein PFICI_10364	305	1	2.21249e-74	76.0%	0	-
g11539	scaffold00032	---NA---	288	0			0	-
g1154	scaffold00002	fad binding domain-containing protein	541	10	0.0	66.0%	3	F:flavin adenine dinucleotide binding; F:UDP-N-acetylmuramate dehydrogenase activity; P:oxidation-reduction process	EC:1.1.1.158
g11540	scaffold00032	family protein	469	10	0.0	71.8%	0	-
g11541	scaffold00032	---NA---	452	0			0	-
g11542	scaffold00032	kelch domain-containing protein	813	10	0.0	67.3%	0	-
g11543	scaffold00032	5-methyltetrahydropteroyltriglutamate-homocysteine methyltransferase	564	10	0.0	91.7%	4	P:methionine biosynthetic process; P:methylation; C:integral to membrane; F:5-methyltetrahydropteroyltriglutamate-homocysteine S-methyltransferase activity	EC:2.1.1.14
g11544	scaffold00032	hypothetical protein PFICI_10369	431	10	0.0	79.0%	0	-
g11545	scaffold00032	---NA---	391	0			0	-
g11546	scaffold00032	ribosome-inactivating protein	241	10	2.03753e-20	51.0%	1	F:hydrolase activity	-
g11547	scaffold00032	---NA---	693	0			0	-
g11548	scaffold00032	pantothenate transporter liz1	530	10	0.0	81.9%	0	-
g11549	scaffold00032	gtp binding protein	734	10	0.0	63.5%	0	-
g1155	scaffold00002	uncharacterized protein FPRN_02037	354	10	1.24529e-121	71.5%	0	-
g11550	scaffold00032	---NA---	339	0			0	-
g11551	scaffold00032	---NA---	207	0			0	-
g11552	scaffold00032	60s ribosomal protein l13	211	10	7.25091e-114	81.1%	0	-
g11553	scaffold00032	alpha- -mannosyltransferase cmt1	544	10	2.9817e-159	68.1%	1	F:transferase activity, transferring glycosyl groups	-
g11554	scaffold00032	nacht and ankyrin domain protein	1311	10	0.0	45.5%	0	-
g11555	scaffold00032	hypothetical protein PFICI_10376	321	10	0.0	57.9%	0	-
g11556	scaffold00032	---NA---	478	0			0	-
g11557	scaffold00032	polyamine transporter tpo5	540	10	0.0	89.6%	3	C:integral to membrane; F:amino acid transmembrane transporter activity; P:amino acid transmembrane transport	-
g11558	scaffold00032	oligopeptide transporter	790	10	0.0	90.7%	1	P:transmembrane transport	-
g11559	scaffold00032	bifunctional fatty acid transporter and acyl- synthetase	437	5	9.85925e-07	48.8%	0	-
g1156	scaffold00002	cytochrome p450	499	10	8.03988e-163	63.3%	6	F:heme binding; F:oxidoreductase activity, acting on paired donors, with incorporation or reduction of molecular oxygen; F:monooxygenase activity; F:iron ion binding; F:electron carrier activity; P:oxidation-reduction process	-
g11560	scaffold00032	protein hir-1	1032	10	0.0	85.0%	0	-
g11561	scaffold00032	---NA---	247	0			0	-
g11562	scaffold00032	related to alpha- -mannosyltransferase	521	10	0.0	65.9%	0	-
g11563	scaffold00032	---NA---	397	0			0	-
g11564	scaffold00032	sugar transporter	583	10	0.0	85.7%	0	-
g11565	scaffold00032	---NA---	581	0			0	-
g11566	scaffold00032	hypothetical protein PFICI_10383	581	10	0.0	58.9%	0	-
g11567	scaffold00032	hypothetical protein PFICI_10384	380	9	5.07768e-53	53.11%	0	-
g11568	scaffold00032	---NA---	215	0			0	-
g11569	scaffold00032	glycoside hydrolase family 74 protein	1459	10	0.0	83.8%	4	F:cellulose binding; P:cellulose catabolic process; F:xyloglucan-specific exo-beta-1,4-glucanase activity; C:extracellular region	EC:3.2.1.155
g1157	scaffold00002	benzoate 4-monooxygenase cytochrome p450	509	10	0.0	73.2%	6	F:heme binding; F:oxidoreductase activity, acting on paired donors, with incorporation or reduction of molecular oxygen; F:monooxygenase activity; F:iron ion binding; F:electron carrier activity; P:oxidation-reduction process	-
g11570	scaffold00032	---NA---	826	0			0	-
g11571	scaffold00032	small monomeric gtpase	151	10	1.03223e-46	59.5%	0	-
g11572	scaffold00032	hypothetical protein PFICI_10388	499	10	0.0	55.3%	2	F:metal ion binding; F:zinc ion binding
g11573	scaffold00032	glycosyltransferase family 69 protein	544	10	0.0	73.2%	3	F:molecular_function; P:biological_process; C:cellular_component
g11574	scaffold00032	hypothetical protein CI238_06791	466	1	6.23626e-30	51.0%	0	-
g11575	scaffold00032	---NA---	287	0			0	-
g11576	scaffold00032	duf636 domain protein	378	10	1.00876e-154	54.4%	0	-
g11577	scaffold00032	hypothetical protein PFICI_10392	243	2	5.71253e-36	66.5%	2	F:molecular_function; C:cellular_component
g11578	scaffold00032	hypothetical protein PFICI_10391	431	10	1.63228e-19	61.2%	0	-
g11579	scaffold00032	hypothetical protein PFICI_10393	171	2	5.61301e-71	65.5%	0	-
g1158	scaffold00002	aldehyde reductase 2	355	10	3.50863e-150	76.3%	5	P:cellular metabolic process; P:steroid biosynthetic process; F:coenzyme binding; P:oxidation-reduction process; F:3-beta-hydroxy-delta5-steroid dehydrogenase activity	EC:1.1.1.145
g11580	scaffold00032	---NA---	146	0			0	-
g11581	scaffold00032	atp-dependent rna helicase mak5	788	10	0.0	77.3%	3	F:nucleic acid binding; F:ATP binding; F:ATP-dependent helicase activity	-
g11582	scaffold00032	---NA---	180	0			0	-
g11583	scaffold00032	like methyltransferase	396	10	0.0	85.8%	2	P:RNA methylation; F:methyltransferase activity	-
g11584	scaffold00032	---NA---	228	0			0	-
g11585	scaffold00032	integral membrane protein	445	10	0.0	52.2%	0	-
g11586	scaffold00032	---NA---	302	0			0	-
g11587	scaffold00032	---NA---	243	0			0	-
g11588	scaffold00032	zn 2cys6 transcription factor	1323	10	0.0	53.9%	6	P:regulation of transcription, DNA-dependent; P:transcription from RNA polymerase II promoter; F:sequence-specific DNA binding RNA polymerase II transcription factor activity; F:zinc ion binding; P:regulation of transcription from RNA polymerase II promoter; C:nucleus
g11589	scaffold00032	fad binding domain protein	598	10	0.0	63.6%	2	P:oxidation-reduction process; F:oxidoreductase activity	-
g1159	scaffold00002	ent-kaurene oxidase	431	10	1.17717e-171	70.3%	6	F:heme binding; F:oxidoreductase activity, acting on paired donors, with incorporation or reduction of molecular oxygen; F:monooxygenase activity; F:iron ion binding; F:electron carrier activity; P:oxidation-reduction process	-
g11590	scaffold00032	hypothetical protein PFICI_07900	454	10	0.0	81.7%	3	F:carbohydrate binding; P:carbohydrate metabolic process; F:hydrolase activity, hydrolyzing O-glycosyl compounds	-
g11591	scaffold00032	unknown	237	1	4.48894e-06	45.0%	0	-
g11592	scaffold00032	glycosyl hydrolase family 43 protein	951	10	0.0	76.6%	2	P:carbohydrate metabolic process; F:hydrolase activity, hydrolyzing O-glycosyl compounds	-
g11593	scaffold00032	glycoside hydrolase family 43 protein	1058	10	0.0	68.1%	2	P:carbohydrate metabolic process; F:hydrolase activity, hydrolyzing O-glycosyl compounds	-
g11594	scaffold00032	berberine family protein	551	10	0.0	77.4%	0	-
g11595	scaffold00032	---NA---	437	0			0	-
g11596	scaffold00032	related to integral membrane protein pth11	405	10	0.0	64.3%	0	-
g11597	scaffold00032	glycoside hydrolase family 92 protein	411	10	0.0	73.1%	0	-
g11598	scaffold00032	---NA---	141	0			0	-
g11599	scaffold00032	group protein	791	10	3.92398e-99	66.2%	0	-
g116	scaffold00001	major facilitator superfamily mfs_1 protein	506	10	0.0	77.9%	3	P:transmembrane transport; C:integral to membrane; F:transporter activity	-
g1160	scaffold00002	s-adenosyl-l-methionine-dependent methyltransferase	408	10	0.0	67.5%	0	-
g11600	scaffold00032	---NA---	253	0			0	-
g11601	scaffold00032	major facilitator superfamily transporter	527	10	0.0	61.3%	0	-
g11602	scaffold00032	alpha-mannosyltransferase alg11p	823	10	1.35185e-121	66.4%	0	-
g11603	scaffold00032	---NA---	238	0			0	-
g11604	scaffold00032	hypothetical protein PFICI_10406	892	10	0.0	53.0%	0	-
g11605	scaffold00032	---NA---	801	0			0	-
g11606	scaffold00032	ser thr protein phosphatase family protein	754	10	0.0	85.5%	0	-
g11607	scaffold00032	---NA---	177	0			0	-
g11608	scaffold00032	ubiquinone menaquinone biosynthesis methyltransferase	320	10	0.0	81.5%	2	P:methylation; F:methyltransferase activity	-
g11609	scaffold00032	chromo domain-containing protein	242	10	1.76596e-106	68.4%	2	C:nucleus; F:DNA binding	-
g1161	scaffold00002	aldo-keto reductase	364	10	3.01385e-170	74.4%	0	-
g11610	scaffold00032	---NA---	162	0			0	-
g11611	scaffold00032	hypothetical protein PFICI_10410	658	10	0.0	68.0%	0	-
g11612	scaffold00032	hsp90-like protein	1513	10	0.0	76.2%	0	-
g11613	scaffold00032	hypothetical protein AC579_2498	1704	7	4.20788e-114	48.71%	0	-
g11614	scaffold00032	plasma membrane h+-atpase	1403	10	0.0	84.1%	7	F:cation-transporting ATPase activity; C:integral to membrane; F:metal ion binding; P:ATP biosynthetic process; P:cation transport; P:ATP catabolic process; F:ATP binding	-
g11615	scaffold00032	2-dehydropantoate 2-reductase	360	10	0.0	80.8%	0	-
g11616	scaffold00032	2og-fe oxygenase family protein	329	10	0.0	78.2%	3	P:oxidation-reduction process; F:iron ion binding; F:oxidoreductase activity, acting on paired donors, with incorporation or reduction of molecular oxygen, 2-oxoglutarate as one donor, and incorporation of one atom each of oxygen into both donors	EC:1.14.11
g11617	scaffold00032	duf21 and cbs domain protein	733	10	0.0	72.3%	1	F:adenyl nucleotide binding	-
g11618	scaffold00032	unnamed protein product	404	1	0.000101831	67.0%	0	-
g11619	scaffold00032	carboxy- -muconate cyclase	362	10	0.0	91.1%	0	-
g1162	scaffold00002	---NA---	148	0			0	-
g11620	scaffold00032	zinc-regulated transporter 2	429	10	0.0	77.9%	4	P:metal ion transport; C:membrane; F:metal ion transmembrane transporter activity; P:transmembrane transport	-
g11621	scaffold00032	hypothetical protein SPBR_03703	240	2	0.000367921	57.0%	0	-
g11622	scaffold00032	cation efflux family protein	605	10	0.0	80.8%	0	-
g11623	scaffold00032	---NA---	149	0			0	-
g11624	scaffold00032	---NA---	248	0			0	-
g11625	scaffold00032	kazal domain-containing protein	124	10	4.55108e-47	58.1%	0	-
g11626	scaffold00032	---NA---	129	0			0	-
g11627	scaffold00032	glycoside hydrolase family 75 protein	393	10	1.61263e-67	67.1%	1	F:hydrolase activity	-
g11628	scaffold00032	---NA---	207	0			0	-
g11629	scaffold00032	---NA---	409	0			0	-
g1163	scaffold00002	mfs transporter	487	10	0.0	70.2%	0	-
g11630	scaffold00032	heme peroxidase	628	10	0.0	78.5%	0	-
g11631	scaffold00032	---NA---	137	0			0	-
g11632	scaffold00032	het domain-containing protein	511	10	1.20301e-75	51.4%	0	-
g11633	scaffold00032	hypothetical protein PFICI_10301	611	10	7.92742e-65	54.1%	0	-
g11634	scaffold00032	ham1 family protein	580	10	2.14729e-95	86.4%	7	C:cytoplasm; F:metal ion binding; F:nucleoside-triphosphate diphosphatase activity; P:deoxyribonucleoside triphosphate catabolic process; P:nucleotide metabolic process; C:nucleus; F:nucleotide binding	EC:3.6.1.19
g11635	scaffold00032	c6 finger domain-containing protein	637	10	0.0	54.8%	5	F:sequence-specific DNA binding RNA polymerase II transcription factor activity; P:regulation of transcription from RNA polymerase II promoter; C:nucleus; F:zinc ion binding; P:transcription from RNA polymerase II promoter	-
g11636	scaffold00032	electron transfer flavoprotein-ubiquinone oxidoreductase	636	10	0.0	87.9%	3	P:oxidation-reduction process; F:iron-sulfur cluster binding; F:electron-transferring-flavoprotein dehydrogenase activity	EC:1.5.5.1
g11637	scaffold00032	phage spo1 dna polymerase-related protein	221	10	8.55075e-39	51.8%	0	-
g11638	scaffold00032	---NA---	531	0			0	-
g11639	scaffold00032	hypothetical protein PFICI_10297	535	1	4.26787e-07	84.0%	0	-
g1164	scaffold00002	---NA---	184	0			0	-
g11640	scaffold00032	tata-box-binding protein	252	10	0.0	93.5%	2	F:DNA binding; P:DNA-dependent transcription, initiation	-
g11641	scaffold00032	hypothetical protein THAOC_23910, partial	144	1	5.17142e-06	53.0%	0	-
g11642	scaffold00032	hypothetical protein BN1723_014737	486	1	3.23331e-19	46.0%	0	-
g11643	scaffold00032	fructosyl-amino acid oxidase protein	478	10	0.0	66.8%	2	P:oxidation-reduction process; F:oxidoreductase activity	-
g11644	scaffold00032	---NA---	617	0			0	-
g11645	scaffold00032	coatamer subunit protein	852	10	0.0	71.1%	2	F:RNA binding; P:RNA processing	-
g11646	scaffold00032	---NA---	266	0			0	-
g11647	scaffold00032	phosphatidylethanolamine n-methyltransferase	912	10	0.0	51.0%	0	-
g11648	scaffold00032	---NA---	143	0			0	-
g11649	scaffold00032	---NA---	698	0			0	-
g1165	scaffold00002	tannase and feruloyl esterase	503	10	0.0	64.4%	0	-
g11650	scaffold00032	nicotinamide n-methyltransferase	261	10	0.0	71.0%	0	-
g11651	scaffold00032	related to rna helicase hel117	391	10	0.0	67.1%	0	-
g11652	scaffold00032	hypothetical protein PFICI_10290	755	10	0.0	58.0%	0	-
g11653	scaffold00032	---NA---	222	0			0	-
g11654	scaffold00032	nicotinamide n-methyltransferase	295	10	3.81361e-163	77.0%	0	-
g11655	scaffold00032	---NA---	352	0			0	-
g11656	scaffold00032	glycoside hydrolase family 55 protein	791	10	0.0	81.7%	2	F:lyase activity; F:hydrolase activity	-
g11657	scaffold00032	---NA---	137	0			0	-
g11658	scaffold00032	c2h2 transcription factor	895	10	0.0	81.2%	4	P:transcription, DNA-dependent; F:DNA binding; C:nucleus; F:zinc ion binding	-
g11659	scaffold00032	hect-domain-containing protein	1892	10	0.0	81.4%	0	-
g1166	scaffold00002	c6 finger domain-containing protein	379	10	1.53789e-147	60.6%	0	-
g11660	scaffold00032	---NA---	513	0			0	-
g11661	scaffold00032	toxin biosynthesis protein	432	10	0.0	71.9%	1	F:aminopeptidase activity	EC:3.4.11
g11662	scaffold00032	---NA---	273	0			0	-
g11663	scaffold00032	hypothetical protein Ao3042_04658	270	2	2.10143e-12	48.5%	3	F:molecular_function; P:biological_process; C:cellular_component
g11664	scaffold00032	nad dependent epimerase dehydratase	285	10	0.0	86.3%	0	-
g11665	scaffold00032	mfs transporter	564	10	0.0	78.0%	4	C:integral to membrane; C:plasma membrane; P:transmembrane transport; F:transporter activity	-
g11666	scaffold00032	hypothetical protein CHGG_08703	416	2	2.90046	48.0%	0	-
g11667	scaffold00032	---NA---	698	0			0	-
g11668	scaffold00032	actin cytoskeleton-regulatory complex protein pan1	619	10	0.0	66.7%	0	-
g11669	scaffold00032	dehydrogenase e1 component	723	10	0.0	87.1%	0	-
g1167	scaffold00002	fad binding domain-containing protein	507	10	0.0	67.7%	0	-
g11670	scaffold00032	hypothetical protein BN871_CZ_00110	465	1	1.46315	46.0%	0	-
g11671	scaffold00032	nadh-ubiquinone oxidoreductase-like protein	287	10	0.0	89.1%	0	-
g11672	scaffold00032	mot2-transcriptional repressor	1749	10	0.0	67.9%	4	F:ATP-dependent helicase activity; F:nucleic acid binding; F:ATP binding; F:zinc ion binding	-
g11673	scaffold00032	---NA---	184	0			0	-
g11674	scaffold00032	---NA---	735	0			0	-
g11675	scaffold00032	vivid pas protein vvd	198	10	2.62855e-127	75.5%	2	P:signal transduction; F:signal transducer activity	-
g11676	scaffold00032	pheromone-regulated membrane protein	869	10	0.0	71.5%	0	-
g11677	scaffold00032	---NA---	189	0			0	-
g11678	scaffold00032	---NA---	155	0			0	-
g11679	scaffold00032	---NA---	523	0			0	-
g1168	scaffold00002	hypothetical protein PFICI_13577	301	1	2.34498e-38	77.0%	0	-
g11680	scaffold00032	g2-specific serine threonine protein kinase protein	507	10	0.0	48.8%	1	F:transferase activity, transferring phosphorus-containing groups	-
g11681	scaffold00032	hypothetical protein PFICI_10274	332	10	1.92199e-125	64.1%	0	-
g11682	scaffold00032	---NA---	372	0			0	-
g11683	scaffold00032	glycoside hydrolase family 7 protein	455	10	0.0	84.6%	2	P:carbohydrate metabolic process; F:hydrolase activity, hydrolyzing O-glycosyl compounds	-
g11684	scaffold00032	---NA---	124	0			0	-
g11685	scaffold00032	heterokaryon incompatibility protein or allele	787	10	1.27594e-141	48.2%	0	-
g11686	scaffold00032	hypothetical protein PFICI_10271	232	10	8.52634e-127	56.7%	0	-
g11687	scaffold00032	---NA---	934	0			0	-
g11688	scaffold00032	patched sphingolipid transporter	1272	10	0.0	86.7%	0	-
g11689	scaffold00032	hypothetical protein PFICI_10269	394	3	9.29533e-103	59.67%	0	-
g1169	scaffold00002	---NA---	239	0			0	-
g11690	scaffold00032	---NA---	150	0			0	-
g11691	scaffold00032	---NA---	120	0			0	-
g11692	scaffold00032	nicotinate nucleotide adenylyltransferase	271	10	0.0	77.8%	2	F:nicotinamide-nucleotide adenylyltransferase activity; P:NAD biosynthetic process	EC:2.7.7.1
g11693	scaffold00032	oxidoreductase fad-binding domain-containing protein	636	10	0.0	67.4%	3	F:oxidoreductase activity; P:oxidation-reduction process; F:FMN binding	-
g11694	scaffold00032	---NA---	469	0			0	-
g11695	scaffold00032	lipase esterase family protein	929	10	0.0	72.5%	2	P:metabolic process; F:hydrolase activity	-
g11696	scaffold00032	---NA---	543	0			0	-
g11697	scaffold00032	bsd domain-containing protein	624	10	0.0	78.0%	0	-
g11698	scaffold00032	pre-rrna-processing protein tsr2	209	10	3.41715e-111	70.8%	0	-
g11699	scaffold00032	---NA---	214	0			0	-
g117	scaffold00001	hypothetical protein MAA_11650	107	2	0.0358038	51.0%	0	-
g1170	scaffold00002	vegetative incompatibility protein het-e-1	974	10	0.0	54.7%	0	-
g11700	scaffold00032	---NA---	154	0			0	-
g11701	scaffold00032	transcription factor pap1	606	10	0.0	68.6%	0	-
g11702	scaffold00032	---NA---	411	0			0	-
g11703	scaffold00032	smr protein 2	536	10	0.0	56.1%	0	-
g11704	scaffold00032	---NA---	169	0			0	-
g11705	scaffold00032	50s ribosomal protein 27 protein	111	10	4.14542e-62	80.7%	1	C:ribosome	-
g11706	scaffold00032	small nucleolar ribonucleoprotein complex subunit utp14	1003	10	0.0	68.3%	0	-
g11707	scaffold00032	---NA---	679	0			0	-
g11708	scaffold00032	---NA---	625	0			0	-
g11709	scaffold00032	neutral ceramidase protein	765	10	0.0	83.6%	0	-
g1171	scaffold00002	---NA---	200	0			0	-
g11710	scaffold00032	---NA---	325	0			0	-
g11711	scaffold00032	glycoside hydrolase family 3 protein	781	10	0.0	84.9%	0	-
g11712	scaffold00032	---NA---	91	0			0	-
g11713	scaffold00032	---NA---	172	0			0	-
g11714	scaffold00032	glycoside hydrolase family 31 protein	910	10	0.0	87.5%	0	-
g11715	scaffold00032	uncharacterised protein	395	1	0.0152587	54.0%	0	-
g11716	scaffold00032	glucosamine-6-phosphate isomerase	384	10	0.0	85.6%	0	-
g11717	scaffold00032	uncharacterised protein	269	10	4.05932e-15	57.7%	3	F:ATP binding; P:carbohydrate metabolic process; F:phosphotransferase activity, alcohol group as acceptor
g11718	scaffold00032	hexokinase-1	549	10	0.0	71.5%	5	F:phosphotransferase activity, alcohol group as acceptor; F:kinase activity; P:phosphorylation; F:ATP binding; P:glycolysis	-
g11719	scaffold00032	---NA---	144	0			0	-
g1172	scaffold00002	gpi anchored dioxygenase	363	10	0.0	75.4%	4	F:ferric iron binding; P:cellular aromatic compound metabolic process; F:oxidoreductase activity, acting on single donors with incorporation of molecular oxygen, incorporation of two atoms of oxygen; P:oxidation-reduction process	EC:1.13.11
g11720	scaffold00032	acid phosphatase	563	10	0.0	70.8%	3	F:sequence-specific DNA binding transcription factor activity; F:DNA binding; P:regulation of transcription, DNA-dependent	-
g11721	scaffold00032	---NA---	282	0			0	-
g11722	scaffold00032	glycoside hydrolase family 3 protein	1366	10	0.0	84.8%	2	P:carbohydrate metabolic process; F:hydrolase activity, hydrolyzing O-glycosyl compounds	-
g11723	scaffold00032	---NA---	600	0			0	-
g11724	scaffold00032	n-acetylglucosamine-6-phosphate deacetylase	435	10	0.0	85.3%	2	F:N-acetylglucosamine-6-phosphate deacetylase activity; P:N-acetylglucosamine metabolic process	EC:3.5.1.25
g11725	scaffold00032	rep helicase	978	10	0.0	73.7%	3	F:DNA binding; F:ATP-dependent DNA helicase activity; F:ATP binding	-
g11726	scaffold00032	hypothetical protein PFICI_14284	516	10	0.0	71.2%	0	-
g11727	scaffold00032	---NA---	282	0			0	-
g11728	scaffold00032	g patch domain-containing protein 1 protein	725	10	0.0	73.4%	1	F:nucleic acid binding	-
g11729	scaffold00032	k(+) h(+) antiporter protein	1026	10	0.0	76.7%	4	C:integral to membrane; P:cation transport; P:transmembrane transport; F:solute:hydrogen antiporter activity	-
g1173	scaffold00002	amino acid transporter	629	10	0.0	73.6%	0	-
g11730	scaffold00032	hypothetical protein CH063_15329, partial	679	1	9.80294e-15	49.0%	0	-
g11731	scaffold00033	---NA---	99	0			0	-
g11732	scaffold00033	---NA---	411	0			0	-
g11733	scaffold00033	glycosyl hydrolases family 43	394	10	0.0	80.6%	3	F:molecular_function; P:biological_process; C:cellular_component
g11734	scaffold00033	sugar transporter	509	10	0.0	86.3%	4	F:substrate-specific transmembrane transporter activity; C:integral to membrane; P:transmembrane transport; P:carbohydrate transport	-
g11735	scaffold00033	---NA---	480	0			0	-
g11736	scaffold00033	nuclear pore protein	306	10	6.90743e-97	55.4%	0	-
g11737	scaffold00033	---NA---	596	0			0	-
g11738	scaffold00033	hypothetical protein PFICI_01117	170	10	9.98862e-48	69.0%	0	-
g11739	scaffold00033	transcription factor cys6	1026	10	0.0	54.6%	5	F:sequence-specific DNA binding RNA polymerase II transcription factor activity; P:regulation of transcription from RNA polymerase II promoter; C:nucleus; F:zinc ion binding; P:transcription from RNA polymerase II promoter	-
g1174	scaffold00002	---NA---	212	0			0	-
g11740	scaffold00033	integral membrane protein	443	10	0.0	61.6%	0	-
g11741	scaffold00033	alpha beta-hydrolase protein	408	10	0.0	75.0%	0	-
g11742	scaffold00033	carbohydrate esterase family 9 protein	1075	10	0.0	71.8%	0	-
g11743	scaffold00033	---NA---	122	0			0	-
g11744	scaffold00033	opt oligopeptide transporter	901	10	0.0	82.7%	0	-
g11745	scaffold00033	bifunctional fatty acid transporter and acyl- synthetase	839	1	3.38008e-06	41.0%	0	-
g11746	scaffold00033	---NA---	270	0			0	-
g11747	scaffold00033	cell surface protein	245	10	2.31341e-147	72.5%	0	-
g11748	scaffold00033	---NA---	306	0			0	-
g11749	scaffold00033	methyltransferase domain-containing protein	279	10	0.0	91.5%	7	F:rRNA (guanine) methyltransferase activity; C:nucleolus; P:cellular bud site selection; P:ribosomal small subunit export from nucleus; C:cytoplasm; P:endonucleolytic cleavage in ITS1 to separate SSU-rRNA from 5.8S rRNA and LSU-rRNA from tricistronic rRNA transcript (SSU-rRNA, 5.8S rRNA, LSU-rRNA); P:rRNA (guanine-N7)-methylation	EC:2.1.1
g1175	scaffold00002	fad fmn-containing isoamyl alcohol oxidase	587	10	0.0	63.4%	3	F:flavin adenine dinucleotide binding; F:UDP-N-acetylmuramate dehydrogenase activity; P:oxidation-reduction process	EC:1.1.1.158
g11750	scaffold00033	transmembrane adaptor erv26	216	10	4.29003e-144	87.5%	1	C:integral to membrane	-
g11751	scaffold00033	---NA---	210	0			0	-
g11752	scaffold00033	atp-binding cassette sub-family a member 9	1611	10	0.0	63.8%	0	-
g11753	scaffold00033	atp-binding protein cassette protein subfamily member 8	954	2	0.341817	49.0%	0	-
g11754	scaffold00033	aldehyde dehydrogenase 9	458	10	1.08322e-11	45.1%	0	-
g11755	scaffold00033	alcohol oxidase	1058	10	0.0	78.5%	4	F:flavin adenine dinucleotide binding; F:choline dehydrogenase activity; P:oxidation-reduction process; P:alcohol metabolic process	EC:1.1.99.1
g11756	scaffold00033	---NA---	242	0			0	-
g11757	scaffold00033	hypothetical protein PFICI_01010	521	10	4.81811e-147	86.5%	0	-
g11758	scaffold00033	n-acyl homoserine lactonase	645	10	0.0	71.4%	1	F:hydrolase activity	-
g11759	scaffold00033	transcriptional regulatory protein	725	10	0.0	66.5%	0	-
g1176	scaffold00002	---NA---	426	0			0	-
g11760	scaffold00033	salicylate hydroxylase	486	10	0.0	76.5%	2	P:oxidation-reduction process; F:oxidoreductase activity	-
g11761	scaffold00033	---NA---	230	0			0	-
g11762	scaffold00033	arylmalonate decarboxylase	253	10	0.0	82.5%	2	F:racemase activity, acting on amino acids and derivatives; P:nitrogen compound metabolic process	-
g11763	scaffold00033	---NA---	168	0			0	-
g11764	scaffold00033	mfs transporter protein	500	10	0.0	77.7%	0	-
g11765	scaffold00033	sexual differentiation process protein isp4	286	1	1.33376	42.0%	0	-
g11766	scaffold00033	type-2 protein geranylgeranyltransferase subunit beta	659	10	0.0	45.8%	0	-
g11767	scaffold00033	---NA---	157	0			0	-
g11768	scaffold00033	dna mismatch repair protein msh3	1123	10	0.0	82.3%	0	-
g11769	scaffold00033	uncharacterised protein	281	10	8.66155e-05	51.8%	0	-
g1177	scaffold00002	di-copper centre-containing protein	352	10	0.0	75.9%	4	C:extracellular region; F:metal ion binding; F:oxidoreductase activity; P:oxidation-reduction process	-
g11770	scaffold00033	---NA---	317	0			0	-
g11771	scaffold00033	endo- -beta-xylanase a	229	10	1.15048e-152	81.6%	2	P:xylan catabolic process; F:endo-1,4-beta-xylanase activity	EC:3.2.1.8
g11772	scaffold00033	alkaline protease 1	423	10	0.0	58.1%	0	-
g11773	scaffold00033	---NA---	248	0			0	-
g11774	scaffold00033	extracellular serine-rich protein	357	10	1.18629e-163	59.4%	0	-
g11775	scaffold00033	feruloyl esterase b	488	10	0.0	62.8%	0	-
g11776	scaffold00033	---NA---	387	0			0	-
g11777	scaffold00033	hypothetical protein PFICI_01022	190	1	4.63425e-96	86.0%	0	-
g11778	scaffold00033	---NA---	117	0			0	-
g11779	scaffold00033	---NA---	436	0			0	-
g1178	scaffold00002	related to heterokaryon incompatibility protein het-6	684	10	6.15257e-72	48.5%	0	-
g11780	scaffold00033	duf221-domain-containing protein	884	10	0.0	72.7%	1	C:membrane	-
g11781	scaffold00033	alternative oxidase	699	10	0.0	66.2%	0	-
g11782	scaffold00033	---NA---	376	0			0	-
g11783	scaffold00033	prolyl oligopeptidase (secreted protein) protein	630	10	0.0	71.8%	1	F:hydrolase activity	-
g11784	scaffold00033	---NA---	353	0			0	-
g11785	scaffold00033	hypothetical protein PFICI_01025	183	2	9.95998e-87	68.0%	0	-
g11786	scaffold00033	4-hydroxybenzoate polyprenyl transferase	415	10	1.69632e-124	71.0%	0	-
g11787	scaffold00033	---NA---	179	0			0	-
g11788	scaffold00033	transcriptional regulatory protein moc3	494	10	0.0	48.6%	6	P:regulation of transcription, DNA-dependent; P:transcription from RNA polymerase II promoter; F:sequence-specific DNA binding RNA polymerase II transcription factor activity; F:zinc ion binding; P:regulation of transcription from RNA polymerase II promoter; C:nucleus
g11789	scaffold00033	wd repeat protein	538	10	0.0	86.8%	0	-
g1179	scaffold00002	---NA---	258	0			0	-
g11790	scaffold00033	---NA---	156	0			0	-
g11791	scaffold00033	dna mismatch repair protein msh4	897	10	0.0	75.4%	0	-
g11792	scaffold00033	glycosyltransferase family 20	918	10	0.0	82.8%	2	F:transferase activity; P:trehalose biosynthetic process	-
g11793	scaffold00033	hypothetical protein BN1708_005977	709	1	6.27332	48.0%	0	-
g11794	scaffold00033	fad binding domain-containing protein	536	10	0.0	64.0%	0	-
g11795	scaffold00033	nad -binding rossmann-fold containing protein	978	10	1.30027e-106	67.2%	2	P:oxidation-reduction process; F:oxidoreductase activity	-
g11796	scaffold00033	haloacetate dehalogenase h-1	349	10	0.0	79.7%	0	-
g11797	scaffold00033	---NA---	221	0			0	-
[truncated: 20,627 more rows]

## Sheet: Legends
Table S3: Overview of genome annotation for assembled genome of Pestalotiopsis sp. KF079.
