# Supplementary material for: Genome Sequencing and analyses of Two Marine Fungi from the North Sea Unraveled a Plethora of Novel Biosynthetic Gene Clusters
Source: Sci Rep. 2018 Jul 5;8:10187. doi: 10.1038/s41598-018-28473-z (PMC6033941; doi:10.1038/s41598-018-28473-z)
Supplement: Supplementary file 7 — Table S6 [file 41598_2018_28473_MOESM7_ESM.xlsx]

## Sheet: Table S6
Gene ID	Contig ID	Details of Protein domain	Domain	Accession	Start	End	Score	E-value
g1	Calca_contig_1	Mitochondrial large subunit ribosomal protein (Img2)	Img2	PF05046	69	114	23.8	5.5e-06
g1	Calca_contig_1	Mitochondrial large subunit ribosomal protein (Img2)	Img2	PF05046	69	135	17.6	0.00043
g2	Calca_contig_1	ARID/BRIGHT DNA binding domain	ARID	PF01388	372	475	42.8	4.2e-11
g2	Calca_contig_1	ARID/BRIGHT DNA binding domain	ARID	PF01388	367	475	44.7	6.7e-10
g4	Calca_contig_1	U3 small nucleolar RNA-associated protein 6	U3_assoc_6	PF08640	62	143	149.1	7.9e-42
g4	Calca_contig_1	U3 small nucleolar RNA-associated protein 6	U3_assoc_6	PF08640	62	143	151	6.5e-42
g10	Calca_contig_1	NmrA-like family	NmrA	PF05368	5	83	82.5	5e-23
g10	Calca_contig_1	NmrA-like family	NmrA	PF05368	102	156	82.5	5e-23
g10	Calca_contig_1	TrkA-N domain	TrkA_N	PF02254	5	66	18.3	0.00061
g10	Calca_contig_1	NmrA-like family	NmrA	PF05368	5	265	40	1.4e-10
g12	Calca_contig_1	NADH:flavin oxidoreductase / NADH oxidase family	Oxidored_FMN	PF00724	7	235	322.3	1.2e-99
g12	Calca_contig_1	NADH:flavin oxidoreductase / NADH oxidase family	Oxidored_FMN	PF00724	311	335	322.3	1.2e-99
g12	Calca_contig_1	NADH:flavin oxidoreductase / NADH oxidase family	Oxidored_FMN	PF00724	7	335	308.6	2.4e-89
g13	Calca_contig_1	Cytochrome P450	p450	PF00067	181	478	140.1	8.6e-43
g13	Calca_contig_1	Cytochrome P450	p450	PF00067	44	512	130	1.4e-35
g18	Calca_contig_1	Ribosomal protein S10p/S20e	Ribosomal_S10	PF00338	18	112	160.5	2e-46
g18	Calca_contig_1	Ribosomal protein S10p/S20e	Ribosomal_S10	PF00338	18	112	162.4	2.4e-45
g19	Calca_contig_1	CUE domain	CUE	PF02845	331	370	32	9.6e-08
g19	Calca_contig_1	CUE domain	CUE	PF02845	328	370	33.2	1.9e-06
g22	Calca_contig_1	DNA polymerase family B, exonuclease domain	DNA_pol_B_exo	PF03104	97	441	358.1	2.9e-104
g22	Calca_contig_1	Domain of unknown function (DUF1744)	DUF1744	PF08490	1523	1910	735.6	3e-221
g22	Calca_contig_1	DNA polymerase family B	DNA_pol_B	PF00136	510	1133	-106.5	7.6e-05
g22	Calca_contig_1	DNA polymerase family B, exonuclease domain	DNA_pol_B_exo	PF03104	97	441	359.8	8.9e-105
g22	Calca_contig_1	Domain of unknown function (DUF1744)	DUF1744	PF08490	1523	1910	737.5	1.8e-218
g29	Calca_contig_6	WD domain, G-beta repeat	WD40	PF00400	8	46	109.5	2e-29
g29	Calca_contig_6	WD domain, G-beta repeat	WD40	PF00400	50	88	109.5	2e-29
g29	Calca_contig_6	WD domain, G-beta repeat	WD40	PF00400	115	143	109.5	2e-29
g29	Calca_contig_6	WD domain, G-beta repeat	WD40	PF00400	243	281	109.5	2e-29
g29	Calca_contig_6	WD domain, G-beta repeat	WD40	PF00400	8	46	114.3	7.5e-31
g29	Calca_contig_6	WD domain, G-beta repeat	WD40	PF00400	50	88	114.3	7.5e-31
g29	Calca_contig_6	WD domain, G-beta repeat	WD40	PF00400	106	143	114.3	7.5e-31
g29	Calca_contig_6	WD domain, G-beta repeat	WD40	PF00400	243	281	114.3	7.5e-31
g30	Calca_contig_6	PFU (PLAA family ubiquitin binding)	PFU	PF09070	327	419	200.9	6e-57
g30	Calca_contig_6	PUL domain	PUL	PF08324	445	714	146.8	1.2e-40
g30	Calca_contig_6	WD domain, G-beta repeat	WD40	PF00400	4	41	153.5	1.2e-42
g30	Calca_contig_6	WD domain, G-beta repeat	WD40	PF00400	50	92	153.5	1.2e-42
g30	Calca_contig_6	WD domain, G-beta repeat	WD40	PF00400	99	137	153.5	1.2e-42
g30	Calca_contig_6	WD domain, G-beta repeat	WD40	PF00400	141	179	153.5	1.2e-42
g30	Calca_contig_6	WD domain, G-beta repeat	WD40	PF00400	188	229	153.5	1.2e-42
g30	Calca_contig_6	WD domain, G-beta repeat	WD40	PF00400	232	269	153.5	1.2e-42
g30	Calca_contig_6	WD domain, G-beta repeat	WD40	PF00400	271	309	153.5	1.2e-42
g30	Calca_contig_6	PFU (PLAA family ubiquitin binding)	PFU	PF09070	296	419	188.2	4e-53
g30	Calca_contig_6	PUL domain	PUL	PF08324	445	714	148.7	3.3e-41
g30	Calca_contig_6	WD domain, G-beta repeat	WD40	PF00400	4	41	167.3	8.3e-47
g30	Calca_contig_6	WD domain, G-beta repeat	WD40	PF00400	50	92	167.3	8.3e-47
g30	Calca_contig_6	WD domain, G-beta repeat	WD40	PF00400	99	137	167.3	8.3e-47
g30	Calca_contig_6	WD domain, G-beta repeat	WD40	PF00400	141	179	167.3	8.3e-47
g30	Calca_contig_6	WD domain, G-beta repeat	WD40	PF00400	188	229	167.3	8.3e-47
g30	Calca_contig_6	WD domain, G-beta repeat	WD40	PF00400	232	269	167.3	8.3e-47
g30	Calca_contig_6	WD domain, G-beta repeat	WD40	PF00400	271	309	167.3	8.3e-47
g35	Calca_contig_6	WD domain, G-beta repeat	WD40	PF00400	110	136	47.1	6.5e-12
g35	Calca_contig_6	WD domain, G-beta repeat	WD40	PF00400	220	258	47.1	6.5e-12
g35	Calca_contig_6	WD domain, G-beta repeat	WD40	PF00400	467	533	47.1	6.5e-12
g35	Calca_contig_6	WD domain, G-beta repeat	WD40	PF00400	552	578	47.1	6.5e-12
g35	Calca_contig_6	WD domain, G-beta repeat	WD40	PF00400	97	136	46.7	1.6e-10
g35	Calca_contig_6	WD domain, G-beta repeat	WD40	PF00400	220	258	46.7	1.6e-10
g35	Calca_contig_6	WD domain, G-beta repeat	WD40	PF00400	262	533	46.7	1.6e-10
g35	Calca_contig_6	WD domain, G-beta repeat	WD40	PF00400	540	578	46.7	1.6e-10
g37	Calca_contig_6	Peroxisomal membrane protein (Pex16)	Pex16	PF08610	36	387	542.7	7.9e-160
g37	Calca_contig_6	Peroxisomal membrane protein (Pex16)	Pex16	PF08610	36	387	544.5	2.3e-160
g38	Calca_contig_6	Fungal specific transcription factor domain	Fungal_trans	PF04082	346	440	52.8	4e-15
g38	Calca_contig_6	Fungal specific transcription factor domain	Fungal_trans	PF04082	346	440	54.7	6.4e-13
g40	Calca_contig_6	IWS1 C-terminus	IWS1_C	PF05909	186	347	149.3	2.2e-41
g40	Calca_contig_6	IWS1 C-terminus	IWS1_C	PF05909	186	427	128.9	3e-35
g41	Calca_contig_6	Protein kinase domain	Pkinase	PF00069	45	363	132.3	4e-37
g41	Calca_contig_6	Protein kinase domain	Pkinase	PF00069	482	502	132.3	4e-37
g41	Calca_contig_6	Protein kinase domain	Pkinase	PF00069	45	502	113.9	9.5e-31
g41	Calca_contig_6	Protein tyrosine kinase	Pkinase_Tyr	PF07714	45	283	-134.2	0.00068
g44	Calca_contig_6	GRIP domain	GRIP	PF01465	1052	1097	56	2.2e-15
g44	Calca_contig_6	GRIP domain	GRIP	PF01465	1052	1097	58	6.5e-14
g45	Calca_contig_6	SWIRM domain	SWIRM	PF04433	344	434	47.1	2.2e-12
g45	Calca_contig_6	SWIRM domain	SWIRM	PF04433	344	434	49	3.3e-11
g46	Calca_contig_6	F-box domain	F-box	PF00646	51	98	36.5	4.1e-09
g46	Calca_contig_6	F-box domain	F-box	PF00646	51	98	38.5	4.9e-08
g47	Calca_contig_6	Protein of unknown function (DUF1691)	DUF1691	PF07950	58	126	99	1.6e-27
g47	Calca_contig_6	Protein of unknown function (DUF1691)	DUF1691	PF07950	160	289	99	1.6e-27
g47	Calca_contig_6	Protein of unknown function (DUF1691)	DUF1691	PF07950	56	158	80.7	9.6e-21
g47	Calca_contig_6	Protein of unknown function (DUF1691)	DUF1691	PF07950	160	289	80.7	9.6e-21
g49	Calca_contig_6	Fungal specific transcription factor domain	Fungal_trans	PF04082	356	450	57.2	2e-16
g49	Calca_contig_6	Fungal specific transcription factor domain	Fungal_trans	PF04082	356	450	59.1	3.1e-14
g50	Calca_contig_6	ABC transporter transmembrane region	ABC_membrane	PF00664	63	338	249.3	1.7e-71
g50	Calca_contig_6	ABC transporter transmembrane region	ABC_membrane	PF00664	704	980	249.3	1.7e-71
g50	Calca_contig_6	ABC transporter	ABC_tran	PF00005	419	612	394.3	3.7e-115
g50	Calca_contig_6	ABC transporter	ABC_tran	PF00005	1058	1244	394.3	3.7e-115
g50	Calca_contig_6	ABC transporter transmembrane region	ABC_membrane	PF00664	63	338	253.2	1.1e-72
g50	Calca_contig_6	ABC transporter transmembrane region	ABC_membrane	PF00664	704	980	253.2	1.1e-72
g50	Calca_contig_6	ABC transporter	ABC_tran	PF00005	419	612	398	2.8e-116
g50	Calca_contig_6	ABC transporter	ABC_tran	PF00005	1058	1244	398	2.8e-116
g51	Calca_contig_6	DnaJ domain	DnaJ	PF00226	83	150	90.3	7.1e-26
g51	Calca_contig_6	DnaJ domain	DnaJ	PF00226	83	150	92.2	3.3e-24
g52	Calca_contig_6	RNA recognition motif. (a.k.a. RRM, RBD, or RNP domain)	RRM_1	PF00076	236	302	36.1	5.3e-09
g52	Calca_contig_6	RNA recognition motif. (a.k.a. RRM, RBD, or RNP domain)	RRM_1	PF00076	236	302	37.9	7e-08
g53	Calca_contig_6	Methyltransferase domain	Methyltransf_11	PF08241	135	233	106.1	2.2e-28
g53	Calca_contig_6	Methyltransferase domain	Methyltransf_12	PF08242	135	231	50.8	1.2e-12
g53	Calca_contig_6	Sterol methyltransferase C-terminal	Sterol_MT_C	PF08498	242	379	279.2	3.6e-90
g53	Calca_contig_6	Methyltransferase domain	Methyltransf_11	PF08241	135	233	108	5.6e-29
g53	Calca_contig_6	Methyltransferase domain	Methyltransf_12	PF08242	135	231	52.7	2.6e-12
g53	Calca_contig_6	Sterol methyltransferase C-terminal	Sterol_MT_C	PF08498	242	379	281.2	4.1e-81
g55	Calca_contig_6	Transketolase, pyrimidine binding domain	Transket_pyr	PF02779	56	233	223.3	6.4e-65
g55	Calca_contig_6	Transketolase, C-terminal domain	Transketolase_C	PF02780	251	374	172	7.8e-49
g55	Calca_contig_6	Transketolase, pyrimidine binding domain	Transket_pyr	PF02779	56	233	225.2	3e-64
g55	Calca_contig_6	Transketolase, C-terminal domain	Transketolase_C	PF02780	251	374	173.9	8.4e-49
g56	Calca_contig_6	DEAD/DEAH box helicase	DEAD	PF00270	302	453	117.5	4.7e-32
g56	Calca_contig_6	DSHCT (NUC185) domain	DSHCT	PF08148	1080	1266	353.3	8.4e-103
g56	Calca_contig_6	Domain of unknown function (DUF427)	DUF427	PF04248	1446	1550	82.5	6.6e-24
g56	Calca_contig_6	Helicase conserved C-terminal domain	Helicase_C	PF00271	572	579	43.6	1.2e-11
g56	Calca_contig_6	Helicase conserved C-terminal domain	Helicase_C	PF00271	661	745	43.6	1.2e-11
g56	Calca_contig_6	DEAD/DEAH box helicase	DEAD	PF00270	302	453	119.2	2.4e-32
g56	Calca_contig_6	DSHCT (NUC185) domain	DSHCT	PF08148	1080	1266	355.2	2.2e-103
g56	Calca_contig_6	Domain of unknown function (DUF427)	DUF427	PF04248	1446	1550	84.4	7.3e-22
g56	Calca_contig_6	Helicase conserved C-terminal domain	Helicase_C	PF00271	661	745	44.1	9.8e-10
g58	Calca_contig_6	Basic region leucine zipper	bZIP_2	PF07716	111	165	30.7	4.1e-07
g58	Calca_contig_6	Basic region leucine zipper	bZIP_2	PF07716	111	165	32.7	2.7e-06
g59	Calca_contig_6	Replication Fork Protection Component Swi3	Swi3	PF07962	68	151	122.6	1.5e-35
g59	Calca_contig_6	Replication Fork Protection Component Swi3	Swi3	PF07962	68	151	124.6	5.7e-34
g61	Calca_contig_6	Fungal hydrophobin	Hydrophobin_2	PF06766	147	211	109	2.9e-29
g61	Calca_contig_6	Fungal hydrophobin	Hydrophobin_2	PF06766	147	211	110.9	7.5e-30
g64	Calca_contig_6	Sulfate transporter family	Sulfate_transp	PF00916	161	489	-113.7	0.00022
g64	Calca_contig_6	Permease family	Xan_ur_permease	PF00860	37	478	-38.2	2.3e-06
g66	Calca_contig_6	Protein kinase domain	Pkinase	PF00069	9	267	90.2	3.7e-25
g66	Calca_contig_6	Protein kinase domain	Pkinase	PF00069	1	267	-20.4	4.2e-07
g70	Calca_contig_6	Alpha amylase, catalytic domain	Alpha-amylase	PF00128	18	107	385.5	1.7e-112
g70	Calca_contig_6	Alpha amylase, catalytic domain	Alpha-amylase	PF00128	127	461	385.5	1.7e-112
g70	Calca_contig_6	Alpha amylase, catalytic domain	Alpha-amylase	PF00128	18	461	379.3	1.2e-110
g72	Calca_contig_6	Major Facilitator Superfamily	MFS_1	PF07690	115	183	37.2	1.1e-09
g72	Calca_contig_6	Major Facilitator Superfamily	MFS_1	PF07690	270	411	37.2	1.1e-09
g72	Calca_contig_6	Sugar (and other) transporter	Sugar_tr	PF00083	58	463	217.3	7.2e-62
g72	Calca_contig_6	Sugar (and other) transporter	Sugar_tr	PF00083	58	463	162.7	2e-45
g73	Calca_contig_6	Fungal specific transcription factor domain	Fungal_trans	PF04082	218	313	30.9	1.5e-08
g73	Calca_contig_6	Fungal Zn(2)-Cys(6) binuclear cluster domain	Zn_clus	PF00172	9	46	44.9	2e-13
g73	Calca_contig_6	Fungal specific transcription factor domain	Fungal_trans	PF04082	218	313	32.8	2.5e-06
g73	Calca_contig_6	Fungal Zn(2)-Cys(6) binuclear cluster domain	Zn_clus	PF00172	9	46	46.8	1.6e-10
g74	Calca_contig_6	E1-E2 ATPase	E1-E2_ATPase	PF00122	527	755	201.5	1.4e-60
g74	Calca_contig_6	Heavy-metal-associated domain	HMA	PF00403	276	341	51.8	3.1e-14
g74	Calca_contig_6	haloacid dehalogenase-like hydrolase	Hydrolase	PF00702	759	978	73.7	2e-20
g74	Calca_contig_6	E1-E2 ATPase	E1-E2_ATPase	PF00122	527	755	203.5	1e-57
g74	Calca_contig_6	Heavy-metal-associated domain	HMA	PF00403	276	341	53.8	1.2e-12
g74	Calca_contig_6	haloacid dehalogenase-like hydrolase	Hydrolase	PF00702	759	978	75.6	3.3e-19
g76	Calca_contig_6	Alpha amylase, catalytic domain	Alpha-amylase	PF00128	36	390	272	2.4e-78
g76	Calca_contig_6	Alpha amylase, catalytic domain	Alpha-amylase	PF00128	36	390	273.8	7.1e-79
g80	Calca_contig_6	Cytidine and deoxycytidylate deaminase zinc-binding region	dCMP_cyt_deam_1	PF00383	161	320	93.8	9.3e-25
g80	Calca_contig_6	Cytidine and deoxycytidylate deaminase zinc-binding region	dCMP_cyt_deam_1	PF00383	161	320	95.6	3.2e-25
g81	Calca_contig_6	Fungal Zn(2)-Cys(6) binuclear cluster domain	Zn_clus	PF00172	188	201	15.3	0.00064
g90	Calca_contig_6	Response regulator receiver domain	Response_reg	PF00072	751	818	90.3	7.7e-27
g90	Calca_contig_6	Response regulator receiver domain	Response_reg	PF00072	856	899	90.3	7.7e-27
g90	Calca_contig_6	Response regulator receiver domain	Response_reg	PF00072	751	899	87.3	1e-22
g92	Calca_contig_6	Methyltransferase domain	Methyltransf_11	PF08241	78	135	27.3	2.2e-06
g92	Calca_contig_6	Methyltransferase domain	Methyltransf_11	PF08241	174	186	27.3	2.2e-06
g92	Calca_contig_6	O-methyltransferase	Methyltransf_3	PF01596	50	116	77.1	2.6e-22
g92	Calca_contig_6	O-methyltransferase	Methyltransf_3	PF01596	127	253	77.1	2.6e-22
g92	Calca_contig_6	O-methyltransferase	Methyltransf_3	PF01596	19	253	59	1e-16
g95	Calca_contig_6	Glycosyl hydrolases family 43	Glyco_hydro_43	PF04616	73	155	58.5	1.9e-20
g95	Calca_contig_6	Glycosyl hydrolases family 43	Glyco_hydro_43	PF04616	228	263	58.5	1.9e-20
g95	Calca_contig_6	Glycosyl hydrolases family 43	Glyco_hydro_43	PF04616	1	321	-43.1	5.1e-07
g97	Calca_contig_6	Lipase (class 3)	Lipase_3	PF01764	800	969	57	1.6e-16
g97	Calca_contig_6	Lipase (class 3)	Lipase_3	PF01764	800	969	58.8	3.8e-14
g99	Calca_contig_8	WD40-like Beta Propeller Repeat	PD40	PF07676	89	126	16.7	0.00017
g99	Calca_contig_8	Prolyl oligopeptidase family	Peptidase_S9	PF00326	452	599	90.9	4.3e-24
g99	Calca_contig_8	Prolyl oligopeptidase family	Peptidase_S9	PF00326	443	601	31.8	9.8e-09
g100	Calca_contig_8	Cytochrome P450	p450	PF00067	308	441	54.3	1.8e-16
g100	Calca_contig_8	Cytochrome P450	p450	PF00067	59	480	-81.9	1.3e-08
g101	Calca_contig_8	GDSL-like Lipase/Acylhydrolase	Lipase_GDSL	PF00657	3	93	19.1	2.4e-05
g102	Calca_contig_8	Methyltransferase domain	Methyltransf_11	PF08241	131	219	30.6	2.8e-07
g102	Calca_contig_8	Methyltransferase domain	Methyltransf_12	PF08242	131	219	49.3	3e-12
g102	Calca_contig_8	Methyltransferase domain	Methyltransf_11	PF08241	131	221	30.7	1e-05
g102	Calca_contig_8	Methyltransferase domain	Methyltransf_12	PF08242	131	219	51.1	7.6e-12
g103	Calca_contig_8	Histidine acid phosphatase	Acid_phosphat_A	PF00328	120	396	106.2	2e-28
g103	Calca_contig_8	Histidine acid phosphatase	Acid_phosphat_A	PF00328	56	396	98.4	4.4e-26
g104	Calca_contig_8	Male sterility protein	NAD_binding_4	PF07993	640	891	51.4	4.6e-18
g104	Calca_contig_8	AMP-binding enzyme	AMP-binding	PF00501	47	407	-67.8	0.00031
g104	Calca_contig_8	Male sterility protein	NAD_binding_4	PF07993	640	891	53.3	1.7e-12
g105	Calca_contig_8	Fatty acid desaturase	FA_desaturase	PF00487	90	155	159.5	2.7e-45
g105	Calca_contig_8	Fatty acid desaturase	FA_desaturase	PF00487	226	359	159.5	2.7e-45
g105	Calca_contig_8	Fatty acid desaturase	FA_desaturase	PF00487	90	359	153.6	1.1e-42
g107	Calca_contig_8	AMP-binding enzyme	AMP-binding	PF00501	565	597	98.2	2.9e-27
g107	Calca_contig_8	AMP-binding enzyme	AMP-binding	PF00501	660	770	98.2	2.9e-27
g107	Calca_contig_8	Cytochrome P450	p450	PF00067	98	174	141	4.4e-43
g107	Calca_contig_8	Cytochrome P450	p450	PF00067	267	456	141	4.4e-43
g107	Calca_contig_8	AMP-binding enzyme	AMP-binding	PF00501	215	770	-43.1	3e-05
g107	Calca_contig_8	Cytochrome P450	p450	PF00067	4	483	126.6	1.5e-34
g108	Calca_contig_9	Cytochrome P450	p450	PF00067	3	322	98	6.7e-30
g108	Calca_contig_9	Cytochrome P450	p450	PF00067	1	344	-80.7	1.1e-08
g109	Calca_contig_9	GDSL-like Lipase/Acylhydrolase	Lipase_GDSL	PF00657	42	66	14.8	0.00044
g109	Calca_contig_9	GDSL-like Lipase/Acylhydrolase	Lipase_GDSL	PF00657	180	231	14.8	0.00044
g110	Calca_contig_9	Major Facilitator Superfamily	MFS_1	PF07690	50	360	100.7	4.1e-27
g110	Calca_contig_9	Major Facilitator Superfamily	MFS_1	PF07690	50	388	95.9	2.5e-25
g112	Calca_contig_9	Glycosyl hydrolase family 71	Glyco_hydro_71	PF03659	25	92	66.2	3.3e-18
g112	Calca_contig_9	Glycosyl hydrolase family 71	Glyco_hydro_71	PF03659	174	271	66.2	3.3e-18
g112	Calca_contig_9	Glycosyl hydrolase family 71	Glyco_hydro_71	PF03659	25	412	-1.9	7.3e-11
g113	Calca_contig_9	Multicopper oxidase	Cu-oxidase	PF00394	42	201	79	6.3e-22
g113	Calca_contig_9	Multicopper oxidase	Cu-oxidase_2	PF07731	297	449	82.6	3.3e-23
g113	Calca_contig_9	Multicopper oxidase	Cu-oxidase_3	PF07732	8	35	20.7	4.8e-05
g113	Calca_contig_9	Multicopper oxidase	Cu-oxidase	PF00394	42	201	80.8	8.9e-21
g113	Calca_contig_9	Multicopper oxidase	Cu-oxidase_2	PF07731	297	449	84.5	7e-22
g114	Calca_contig_9	FAD dependent oxidoreductase	DAO	PF01266	4	28	20.2	3.4e-05
g114	Calca_contig_9	FAD binding domain	FAD_binding_2	PF00890	4	28	15.1	0.00042
g114	Calca_contig_9	FAD binding domain	FAD_binding_3	PF01494	2	25	29	2.7e-08
g114	Calca_contig_9	FAD binding domain	FAD_binding_3	PF01494	299	329	29	2.7e-08
g114	Calca_contig_9	FAD binding domain	FAD_binding_3	PF01494	2	367	-78.4	6.6e-07
g115	Calca_contig_9	ZIP Zinc transporter	Zip	PF02535	28	185	183.6	1e-51
g115	Calca_contig_9	ZIP Zinc transporter	Zip	PF02535	229	378	183.6	1e-51
g115	Calca_contig_9	ZIP Zinc transporter	Zip	PF02535	28	378	194.6	5e-55
g117	Calca_contig_9	alpha/beta hydrolase fold	Abhydrolase_1	PF00561	133	200	36.9	8.2e-10
g117	Calca_contig_9	Epoxide hydrolase N terminus	EHN	PF06441	6	121	116.2	1.1e-31
g117	Calca_contig_9	Epoxide hydrolase N terminus	EHN	PF06441	6	121	118.2	5e-32
g121	Calca_contig_9	SCP-like extracellular protein	SCP	PF00188	44	156	77.4	4.6e-22
g121	Calca_contig_9	SCP-like extracellular protein	SCP	PF00188	44	156	79	3.1e-20
g125	Calca_contig_9	Putative glycosyl hydrolase of unknown function (DUF1680)	DUF1680	PF07944	169	213	15.8	6.3e-05
g127	Calca_contig_9	Methyltransferase domain	Methyltransf_11	PF08241	60	163	27.6	1.8e-06
g127	Calca_contig_9	Methyltransferase domain	Methyltransf_12	PF08242	60	161	58.2	1.3e-14
g127	Calca_contig_9	Methyltransferase domain	Methyltransf_11	PF08241	60	163	29.6	2.3e-05
g127	Calca_contig_9	Methyltransferase domain	Methyltransf_12	PF08242	60	161	60	1.6e-14
g129	Calca_contig_9	Glutathione S-transferase, C-terminal domain	GST_C	PF00043	150	207	19.9	7.1e-05
g130	Calca_contig_9	Protein kinase domain	Pkinase	PF00069	104	197	202.8	1.6e-57
g130	Calca_contig_9	Protein kinase domain	Pkinase	PF00069	402	620	202.8	1.6e-57
g130	Calca_contig_9	Protein tyrosine kinase	Pkinase_Tyr	PF07714	104	196	43.8	3e-12
g130	Calca_contig_9	Protein tyrosine kinase	Pkinase_Tyr	PF07714	418	453	43.8	3e-12
g130	Calca_contig_9	Protein tyrosine kinase	Pkinase_Tyr	PF07714	513	522	43.8	3e-12
g130	Calca_contig_9	Protein kinase domain	Pkinase	PF00069	104	620	147.8	6.1e-41
g130	Calca_contig_9	Protein tyrosine kinase	Pkinase_Tyr	PF07714	104	618	-12.8	2.6e-11
g132	Calca_contig_9	Major Facilitator Superfamily	MFS_1	PF07690	29	402	168.3	4e-47
g132	Calca_contig_9	Major Facilitator Superfamily	MFS_1	PF07690	418	469	168.3	4e-47
g132	Calca_contig_9	Major Facilitator Superfamily	MFS_1	PF07690	29	436	175.2	3.3e-49
g135	Calca_contig_9	Glycosyl transferases group 1	Glycos_transf_1	PF00534	222	302	121.4	5.3e-33
g135	Calca_contig_9	Glycosyl transferases group 1	Glycos_transf_1	PF00534	324	423	121.4	5.3e-33
g135	Calca_contig_9	Glycosyl transferases group 1	Glycos_transf_1	PF00534	222	423	116.5	1.6e-31
g136	Calca_contig_9	TBC domain	TBC	PF00566	756	972	262	2.6e-75
g136	Calca_contig_9	TBC domain	TBC	PF00566	756	972	264	6.5e-76
g137	Calca_contig_9	Enoyl-CoA hydratase/isomerase family	ECH	PF00378	30	150	50.4	1.3e-13
g137	Calca_contig_9	Enoyl-CoA hydratase/isomerase family	ECH	PF00378	172	195	50.4	1.3e-13
g137	Calca_contig_9	Enoyl-CoA hydratase/isomerase family	ECH	PF00378	30	195	50.3	1.3e-11
g141	Calca_contig_9	Leucine Rich Repeat	LRR_1	PF00560	1334	1354	36.4	1.7e-08
g141	Calca_contig_9	Leucine Rich Repeat	LRR_1	PF00560	1356	1376	36.4	1.7e-08
g141	Calca_contig_9	Leucine Rich Repeat	LRR_1	PF00560	1378	1398	36.4	1.7e-08
g141	Calca_contig_9	Leucine Rich Repeat	LRR_1	PF00560	1400	1422	36.4	1.7e-08
g141	Calca_contig_9	Leucine Rich Repeat	LRR_1	PF00560	1423	1443	36.4	1.7e-08
g141	Calca_contig_9	Leucine Rich Repeat	LRR_1	PF00560	1445	1465	36.4	1.7e-08
g141	Calca_contig_9	Leucine Rich Repeat	LRR_1	PF00560	1467	1489	36.4	1.7e-08
g141	Calca_contig_9	Leucine Rich Repeat	LRR_1	PF00560	1535	1556	36.4	1.7e-08
g141	Calca_contig_9	Leucine Rich Repeat	LRR_1	PF00560	1557	1578	36.4	1.7e-08
g141	Calca_contig_9	Leucine Rich Repeat	LRR_1	PF00560	1581	1601	36.4	1.7e-08
g141	Calca_contig_9	Leucine Rich Repeat	LRR_1	PF00560	1629	1651	36.4	1.7e-08
g141	Calca_contig_9	Leucine Rich Repeat	LRR_1	PF00560	1291	1311	54.2	8.9e-13
g141	Calca_contig_9	Leucine Rich Repeat	LRR_1	PF00560	1314	1332	54.2	8.9e-13
g141	Calca_contig_9	Leucine Rich Repeat	LRR_1	PF00560	1334	1354	54.2	8.9e-13
g141	Calca_contig_9	Leucine Rich Repeat	LRR_1	PF00560	1356	1376	54.2	8.9e-13
g141	Calca_contig_9	Leucine Rich Repeat	LRR_1	PF00560	1378	1398	54.2	8.9e-13
g141	Calca_contig_9	Leucine Rich Repeat	LRR_1	PF00560	1400	1422	54.2	8.9e-13
g141	Calca_contig_9	Leucine Rich Repeat	LRR_1	PF00560	1423	1443	54.2	8.9e-13
g141	Calca_contig_9	Leucine Rich Repeat	LRR_1	PF00560	1445	1465	54.2	8.9e-13
g141	Calca_contig_9	Leucine Rich Repeat	LRR_1	PF00560	1467	1489	54.2	8.9e-13
g141	Calca_contig_9	Leucine Rich Repeat	LRR_1	PF00560	1535	1556	54.2	8.9e-13
g141	Calca_contig_9	Leucine Rich Repeat	LRR_1	PF00560	1557	1578	54.2	8.9e-13
g141	Calca_contig_9	Leucine Rich Repeat	LRR_1	PF00560	1581	1601	54.2	8.9e-13
g141	Calca_contig_9	Leucine Rich Repeat	LRR_1	PF00560	1603	1624	54.2	8.9e-13
g141	Calca_contig_9	Leucine Rich Repeat	LRR_1	PF00560	1629	1651	54.2	8.9e-13
g145	Calca_contig_9	Inositol polyphosphate kinase	IPK	PF03770	1144	1194	71.3	2.8e-20
g145	Calca_contig_9	Inositol polyphosphate kinase	IPK	PF03770	1233	1344	71.3	2.8e-20
g145	Calca_contig_9	Inositol polyphosphate kinase	IPK	PF03770	1017	1344	55.8	1.5e-13
g146	Calca_contig_9	Ras family	Ras	PF00071	128	290	-52.6	4.2e-05
g148	Calca_contig_9	Oligosaccharide biosynthesis protein Alg14 like	Alg14	PF08660	84	270	208.8	8.5e-61
g148	Calca_contig_9	Oligosaccharide biosynthesis protein Alg14 like	Alg14	PF08660	84	278	208.5	3.3e-59
g150	Calca_contig_9	PPR repeat	PPR	PF01535	172	186	44.4	9.4e-12
g150	Calca_contig_9	PPR repeat	PPR	PF01535	194	228	44.4	9.4e-12
g150	Calca_contig_9	PPR repeat	PPR	PF01535	229	263	44.4	9.4e-12
g150	Calca_contig_9	PPR repeat	PPR	PF01535	264	290	44.4	9.4e-12
g150	Calca_contig_9	PPR repeat	PPR	PF01535	194	228	50.2	1.4e-11
g150	Calca_contig_9	PPR repeat	PPR	PF01535	229	263	50.2	1.4e-11
g150	Calca_contig_9	PPR repeat	PPR	PF01535	264	298	50.2	1.4e-11
g151	Calca_contig_9	Cytochrome c oxidase subunit VIIc	COX7C	PF02935	1	75	18.9	5.2e-05
g151	Calca_contig_9	Cytochrome c oxidase subunit VIIc	COX7C	PF02935	1	75	20.8	0.00012
g152	Calca_contig_9	DEAD/DEAH box helicase	DEAD	PF00270	166	318	120.3	8e-33
g152	Calca_contig_9	DSHCT (NUC185) domain	DSHCT	PF08148	912	1101	315.3	2.2e-91
g152	Calca_contig_9	Helicase conserved C-terminal domain	Helicase_C	PF00271	482	566	42.2	3.3e-11
g152	Calca_contig_9	DEAD/DEAH box helicase	DEAD	PF00270	166	318	122	3.5e-33
g152	Calca_contig_9	DSHCT (NUC185) domain	DSHCT	PF08148	912	1101	317.3	5.7e-92
g152	Calca_contig_9	Helicase conserved C-terminal domain	Helicase_C	PF00271	482	566	44.2	9.5e-10
g156	Calca_contig_9	Major Facilitator Superfamily	MFS_1	PF07690	83	425	68	3.8e-18
g156	Calca_contig_9	Major Facilitator Superfamily	MFS_1	PF07690	83	425	69.9	1.7e-17
g158	Calca_contig_9	Major Facilitator Superfamily	MFS_1	PF07690	35	184	17.1	0.00036
g161	Calca_contig_10	RNA recognition motif. (a.k.a. RRM, RBD, or RNP domain)	RRM_1	PF00076	217	288	66.4	1.7e-17
g161	Calca_contig_10	RNA recognition motif. (a.k.a. RRM, RBD, or RNP domain)	RRM_1	PF00076	217	288	68.3	5e-17
g164	Calca_contig_10	Domain of unknown function DUF221	DUF221	PF02714	605	954	260.6	6.8e-75
g164	Calca_contig_10	Domain of unknown function DUF221	DUF221	PF02714	605	1067	273.1	1.2e-78
g166	Calca_contig_10	Domain of unknown function (DUF427)	DUF427	PF04248	12	107	121.1	1.7e-35
g166	Calca_contig_10	Domain of unknown function (DUF427)	DUF427	PF04248	12	107	121.2	6.2e-33
g167	Calca_contig_10	alpha/beta hydrolase fold	Abhydrolase_1	PF00561	652	972	62.3	6e-17
g167	Calca_contig_10	alpha/beta hydrolase fold	Abhydrolase_1	PF00561	652	972	64.3	8.4e-16
g169	Calca_contig_10	Spo7-like protein	Spo7	PF03907	39	166	98.9	1.4e-27
g169	Calca_contig_10	Spo7-like protein	Spo7	PF03907	239	271	98.9	1.4e-27
g169	Calca_contig_10	Spo7-like protein	Spo7	PF03907	39	283	59.4	2.4e-14
g171	Calca_contig_10	Acetyltransferase (GNAT) family	Acetyltransf_1	PF00583	90	183	30	4.5e-09
g171	Calca_contig_10	Acetyltransferase (GNAT) family	Acetyltransf_1	PF00583	90	183	32	4.3e-06
g175	Calca_contig_10	N2,N2-dimethylguanosine tRNA methyltransferase	TRM	PF02005	24	437	431.5	3.8e-136
g175	Calca_contig_10	N2,N2-dimethylguanosine tRNA methyltransferase	TRM	PF02005	462	519	431.5	3.8e-136
g175	Calca_contig_10	N2,N2-dimethylguanosine tRNA methyltransferase	TRM	PF02005	24	519	427.8	3.2e-125
g177	Calca_contig_10	ABC transporter	ABC_tran	PF00005	63	84	242.4	2e-69
g177	Calca_contig_10	ABC transporter	ABC_tran	PF00005	253	348	242.4	2e-69
g177	Calca_contig_10	ABC transporter	ABC_tran	PF00005	500	661	242.4	2e-69
g177	Calca_contig_10	Miro-like protein	Miro	PF08477	65	93	28.1	3.5e-07
g177	Calca_contig_10	Miro-like protein	Miro	PF08477	502	528	28.1	3.5e-07
g177	Calca_contig_10	ABC transporter	ABC_tran	PF00005	63	348	225	3.4e-64
g177	Calca_contig_10	ABC transporter	ABC_tran	PF00005	500	673	225	3.4e-64
g180	Calca_contig_10	ABC transporter transmembrane region	ABC_membrane	PF00664	278	442	103.5	1.3e-27
g180	Calca_contig_10	ABC transporter transmembrane region	ABC_membrane	PF00664	513	548	103.5	1.3e-27
g180	Calca_contig_10	ABC transporter transmembrane region	ABC_membrane	PF00664	903	1180	103.5	1.3e-27
g180	Calca_contig_10	ABC transporter	ABC_tran	PF00005	649	826	249.5	1.5e-71
g180	Calca_contig_10	ABC transporter	ABC_tran	PF00005	1252	1434	249.5	1.5e-71
g180	Calca_contig_10	ABC transporter transmembrane region	ABC_membrane	PF00664	278	548	107.3	9.6e-29
g180	Calca_contig_10	ABC transporter transmembrane region	ABC_membrane	PF00664	903	1180	107.3	9.6e-29
g180	Calca_contig_10	ABC transporter	ABC_tran	PF00005	649	826	253.1	1.2e-72
g180	Calca_contig_10	ABC transporter	ABC_tran	PF00005	1252	1434	253.1	1.2e-72
g182	Calca_contig_10	NDT80 / PhoG like DNA-binding family	NDT80_PhoG	PF05224	73	159	180.9	1.4e-52
g182	Calca_contig_10	NDT80 / PhoG like DNA-binding family	NDT80_PhoG	PF05224	196	265	180.9	1.4e-52
g182	Calca_contig_10	NDT80 / PhoG like DNA-binding family	NDT80_PhoG	PF05224	73	265	178.8	2.9e-50
g184	Calca_contig_10	7,8-dihydro-6-hydroxymethylpterin-pyrophosphokinase (HPPK)	HPPK	PF01288	70	196	207.4	2.1e-61
g184	Calca_contig_10	Pterin binding enzyme	Pterin_bind	PF00809	250	466	296.7	9e-86
g184	Calca_contig_10	7,8-dihydro-6-hydroxymethylpterin-pyrophosphokinase (HPPK)	HPPK	PF01288	70	196	209.3	1.9e-59
g184	Calca_contig_10	Pterin binding enzyme	Pterin_bind	PF00809	250	466	298.7	2.3e-86
g185	Calca_contig_10	2-nitropropane dioxygenase	NPD	PF03060	8	286	236.9	2e-69
g185	Calca_contig_10	2-nitropropane dioxygenase	NPD	PF03060	8	357	222.1	2.6e-63
g186	Calca_contig_10	Putative GTPase activating protein for Arf	ArfGap	PF01412	11	130	164.5	1.2e-46
g186	Calca_contig_10	Putative GTPase activating protein for Arf	ArfGap	PF01412	11	130	166.3	1.6e-46
g188	Calca_contig_10	TIM21	TIM21	PF08294	68	213	177.9	5.1e-50
g188	Calca_contig_10	TIM21	TIM21	PF08294	68	213	179.9	1.3e-50
g190	Calca_contig_10	Zinc finger, C2H2 type	zf-C2H2	PF00096	65	87	48.2	5.6e-11
g190	Calca_contig_10	Zinc finger, C2H2 type	zf-C2H2	PF00096	93	117	48.2	5.6e-11
g190	Calca_contig_10	Zinc finger, C2H2 type	zf-C2H2	PF00096	65	87	52.2	3.6e-12
g190	Calca_contig_10	Zinc finger, C2H2 type	zf-C2H2	PF00096	93	117	52.2	3.6e-12
g194	Calca_contig_10	Bromodomain	Bromodomain	PF00439	323	393	73.9	6.5e-20
g194	Calca_contig_10	Bromodomain	Bromodomain	PF00439	298	393	64.1	9.5e-16
g196	Calca_contig_10	Transmembrane amino acid transporter protein	Aa_trans	PF01490	757	1148	108.9	3e-29
g196	Calca_contig_10	Amino acid permease	AA_permease	PF00324	114	576	-37.9	0.00021
g196	Calca_contig_10	Transmembrane amino acid transporter protein	Aa_trans	PF01490	757	1148	110.8	8.3e-30
g198	Calca_contig_10	Glycosyl hydrolase family 71	Glyco_hydro_71	PF03659	15	83	49.8	1.2e-13
g198	Calca_contig_10	Glycosyl hydrolase family 71	Glyco_hydro_71	PF03659	146	242	49.8	1.2e-13
g198	Calca_contig_10	Glycosyl hydrolase family 71	Glyco_hydro_71	PF03659	1	384	-27.6	1.3e-09
g199	Calca_contig_10	FAD binding domain	FAD_binding_3	PF01494	8	25	18.8	2.8e-05
g199	Calca_contig_10	FAD binding domain	FAD_binding_3	PF01494	267	301	18.8	2.8e-05
g199	Calca_contig_10	Pyridine nucleotide-disulphide oxidoreductase	Pyr_redox_2	PF07992	10	41	17.1	0.00058
g199	Calca_contig_10	FAD binding domain	FAD_binding_3	PF01494	8	321	-106.3	3.7e-05
g200	Calca_contig_10	metallopeptidase family M24	Peptidase_M24	PF00557	154	372	165.3	1.3e-46
g200	Calca_contig_10	metallopeptidase family M24	Peptidase_M24	PF00557	154	410	152.6	2.1e-42
g201	Calca_contig_10	Major Facilitator Superfamily	MFS_1	PF07690	1	244	66.8	8.4e-18
g203	Calca_contig_10	RmlD substrate binding domain	RmlD_sub_bind	PF04321	1	19	18.8	4.7e-05
g204	Calca_contig_10	Trypsin	Trypsin	PF00089	37	259	276.5	8.2e-86
g204	Calca_contig_10	Trypsin	Trypsin	PF00089	37	259	278.3	3e-80
g205	Calca_contig_10	OsmC-like protein	OsmC	PF02566	48	157	48.8	6.3e-13
g205	Calca_contig_10	OsmC-like protein	OsmC	PF02566	48	168	48.6	4.5e-11
g206	Calca_contig_10	Sulfatase	Sulfatase	PF00884	386	489	47.5	7.6e-13
g206	Calca_contig_10	Sulfatase	Sulfatase	PF00884	589	730	47.5	7.6e-13
g206	Calca_contig_10	Sulfatase	Sulfatase	PF00884	386	818	27.6	8.3e-07
g209	Calca_contig_10	Cytochrome P450	p450	PF00067	106	368	69.1	5e-21
g209	Calca_contig_10	Cytochrome P450	p450	PF00067	426	536	69.1	5e-21
g209	Calca_contig_10	Cytochrome P450	p450	PF00067	51	536	53.9	5.7e-16
g210	Calca_contig_10	3-beta hydroxysteroid dehydrogenase/isomerase family	3Beta_HSD	PF01073	104	161	13.8	0.0007
g210	Calca_contig_10	short chain dehydrogenase	adh_short	PF00106	101	262	85.8	5.3e-23
g210	Calca_contig_10	short chain dehydrogenase	adh_short	PF00106	101	262	87.7	7.6e-23
g211	Calca_contig_10	Cytochrome P450	p450	PF00067	69	546	217.3	1.7e-66
g211	Calca_contig_10	Cytochrome P450	p450	PF00067	69	546	219.2	1.9e-62
g214	Calca_contig_10	Domain of unknown function (DUF1929)	DUF1929	PF09118	582	674	114.7	7.6e-38
g214	Calca_contig_10	F5/8 type C domain	F5_F8_type_C	PF00754	51	181	110	1.9e-30
g214	Calca_contig_10	Kelch motif	Kelch_1	PF01344	292	306	59.8	9.7e-16
g214	Calca_contig_10	Kelch motif	Kelch_1	PF01344	309	355	59.8	9.7e-16
g214	Calca_contig_10	Kelch motif	Kelch_1	PF01344	478	529	59.8	9.7e-16
g214	Calca_contig_10	Kelch motif	Kelch_2	PF07646	308	355	21	0.0002
g214	Calca_contig_10	Kelch motif	Kelch_2	PF07646	478	529	21	0.0002
g214	Calca_contig_10	Domain of unknown function (DUF1929)	DUF1929	PF09118	582	677	115.4	3.5e-31
g214	Calca_contig_10	F5/8 type C domain	F5_F8_type_C	PF00754	51	181	111.8	4e-30
g214	Calca_contig_10	Kelch motif	Kelch_1	PF01344	265	306	63.8	1.2e-15
g214	Calca_contig_10	Kelch motif	Kelch_1	PF01344	309	355	63.8	1.2e-15
g214	Calca_contig_10	Kelch motif	Kelch_1	PF01344	478	529	63.8	1.2e-15
g214	Calca_contig_10	Kelch motif	Kelch_2	PF07646	265	306	25.1	0.0005
g214	Calca_contig_10	Kelch motif	Kelch_2	PF07646	308	355	25.1	0.0005
g214	Calca_contig_10	Kelch motif	Kelch_2	PF07646	478	529	25.1	0.0005
g216	Calca_contig_10	Major Facilitator Superfamily	MFS_1	PF07690	91	527	23.4	6.8e-06
g216	Calca_contig_10	POT family	PTR2	PF00854	145	205	40	5.7e-11
g216	Calca_contig_10	POT family	PTR2	PF00854	236	267	40	5.7e-11
g216	Calca_contig_10	POT family	PTR2	PF00854	378	519	40	5.7e-11
g216	Calca_contig_10	Major Facilitator Superfamily	MFS_1	PF07690	62	527	27.6	9e-05
g216	Calca_contig_10	POT family	PTR2	PF00854	145	519	28	1.2e-06
g218	Calca_contig_10	Arabidopsis proteins of unknown function	DUF239	PF03080	180	346	99.7	3e-30
g218	Calca_contig_10	Arabidopsis proteins of unknown function	DUF239	PF03080	138	346	98.5	4.1e-26
g220	Calca_contig_10	SET domain	SET	PF00856	380	407	30	7.2e-08
g220	Calca_contig_10	SET domain	SET	PF00856	519	564	30	7.2e-08
g220	Calca_contig_10	Tetratricopeptide repeat	TPR_1	PF00515	216	249	26.2	4.3e-06
g220	Calca_contig_10	Tetratricopeptide repeat	TPR_1	PF00515	301	334	26.2	4.3e-06
g220	Calca_contig_10	Tetratricopeptide repeat	TPR_2	PF07719	216	249	33.8	4.4e-08
g220	Calca_contig_10	Tetratricopeptide repeat	TPR_2	PF07719	261	294	33.8	4.4e-08
g220	Calca_contig_10	Tetratricopeptide repeat	TPR_2	PF07719	301	334	33.8	4.4e-08
g220	Calca_contig_10	Tetratricopeptide repeat	TPR_1	PF00515	216	249	30.2	1.5e-05
g220	Calca_contig_10	Tetratricopeptide repeat	TPR_1	PF00515	301	334	30.2	1.5e-05
g220	Calca_contig_10	Tetratricopeptide repeat	TPR_2	PF07719	216	249	39.8	2e-08
g220	Calca_contig_10	Tetratricopeptide repeat	TPR_2	PF07719	261	294	39.8	2e-08
g220	Calca_contig_10	Tetratricopeptide repeat	TPR_2	PF07719	301	334	39.8	2e-08
g222	Calca_contig_10	Berberine and berberine like	BBE	PF08031	515	548	29.1	3.1e-07
g222	Calca_contig_10	FAD binding domain	FAD_binding_4	PF01565	127	274	61.2	2.4e-16
g222	Calca_contig_10	Berberine and berberine like	BBE	PF08031	515	559	26.6	7.4e-05
g222	Calca_contig_10	FAD binding domain	FAD_binding_4	PF01565	127	274	63.1	1.8e-15
g223	Calca_contig_10	FAD dependent oxidoreductase	DAO	PF01266	12	431	101.9	4.3e-28
g223	Calca_contig_10	Pyridine nucleotide-disulphide oxidoreductase	Pyr_redox	PF00070	12	35	29.3	1e-07
g223	Calca_contig_10	Pyridine nucleotide-disulphide oxidoreductase	Pyr_redox	PF00070	180	242	29.3	1e-07
g223	Calca_contig_10	FAD dependent oxidoreductase	DAO	PF01266	12	431	96.1	2.1e-25
g224	Calca_contig_10	Major Facilitator Superfamily	MFS_1	PF07690	93	331	60.9	3.5e-16
g224	Calca_contig_10	Major Facilitator Superfamily	MFS_1	PF07690	93	431	54.4	8e-13
g225	Calca_contig_10	Glycosyl Hydrolase Family 88	Glyco_hydro_88	PF07470	36	385	284	6.9e-84
g225	Calca_contig_10	Glycosyl Hydrolase Family 88	Glyco_hydro_88	PF07470	36	385	285.8	1.7e-82
g226	Calca_contig_10	Cytochrome P450	p450	PF00067	268	424	119.6	1.6e-36
g226	Calca_contig_10	Cytochrome P450	p450	PF00067	12	473	66.1	1.2e-16
g229	Calca_contig_10	Zinc carboxypeptidase	Peptidase_M14	PF00246	141	425	396.9	6e-116
g229	Calca_contig_10	Zinc carboxypeptidase	Peptidase_M14	PF00246	141	425	398.8	1.6e-116
g232	Calca_contig_10	Type I phosphodiesterase / nucleotide pyrophosphatase	Phosphodiest	PF01663	644	682	22	2.7e-05
g232	Calca_contig_10	Sulfatase	Sulfatase	PF00884	456	487	33.1	7.8e-09
g232	Calca_contig_10	Sulfatase	Sulfatase	PF00884	589	733	33.1	7.8e-09
g232	Calca_contig_10	Sulfatase	Sulfatase	PF00884	386	744	15.8	3.6e-06
g233	Calca_contig_10	short chain dehydrogenase	adh_short	PF00106	51	220	67.3	6.8e-18
g233	Calca_contig_10	short chain dehydrogenase	adh_short	PF00106	51	220	69.2	2.7e-17
g233	Calca_contig_10	KR domain	KR	PF08659	55	237	-53.4	0.00061
g235	Calca_contig_10	Fungal specific transcription factor domain	Fungal_trans	PF04082	232	257	29	5.5e-08
g235	Calca_contig_10	Fungal specific transcription factor domain	Fungal_trans	PF04082	290	331	29	5.5e-08
g235	Calca_contig_10	Glycosyl hydrolase family 65 central catalytic domain	Glyco_hydro_65m	PF03632	1054	1090	13.1	0.00097
g235	Calca_contig_10	Fungal specific transcription factor domain	Fungal_trans	PF04082	215	331	29.6	2.3e-05
g237	Calca_contig_10	SRP54-type protein, GTPase domain	SRP54	PF00448	100	296	394.1	4.3e-115
g237	Calca_contig_10	SRP54-type protein, helical bundle domain	SRP54_N	PF02881	2	88	101.3	2.7e-27
g237	Calca_contig_10	Signal peptide binding domain	SRP_SPB	PF02978	325	427	148.4	3.9e-41
g237	Calca_contig_10	Signal peptide binding domain	SRP_SPB	PF02978	475	504	148.4	3.9e-41
g237	Calca_contig_10	SRP54-type protein, GTPase domain	SRP54	PF00448	100	296	396	1.1e-115
g237	Calca_contig_10	SRP54-type protein, helical bundle domain	SRP54_N	PF02881	2	88	103.3	1.5e-27
g237	Calca_contig_10	Signal peptide binding domain	SRP_SPB	PF02978	325	427	163	1.6e-45
g238	Calca_contig_10	Major Facilitator Superfamily	MFS_1	PF07690	61	461	58	2.2e-15
g238	Calca_contig_10	Major Facilitator Superfamily	MFS_1	PF07690	61	461	59.9	1.7e-14
g240	Calca_contig_10	AMP-binding enzyme	AMP-binding	PF00501	89	199	54.7	5.3e-15
g240	Calca_contig_10	AMP-binding enzyme	AMP-binding	PF00501	227	335	54.7	5.3e-15
g240	Calca_contig_10	AMP-binding enzyme	AMP-binding	PF00501	406	447	54.7	5.3e-15
g240	Calca_contig_10	Male sterility protein	NAD_binding_4	PF07993	678	913	90.3	9.5e-32
g240	Calca_contig_10	Phosphopantetheine attachment site	PP-binding	PF00550	557	601	21.7	8.2e-05
g240	Calca_contig_10	AMP-binding enzyme	AMP-binding	PF00501	49	447	16.1	1.1e-07
g240	Calca_contig_10	Male sterility protein	NAD_binding_4	PF07993	678	913	92.1	3.4e-24
g241	Calca_contig_10	UbiA prenyltransferase family	UbiA	PF01040	85	356	110.5	1e-29
g241	Calca_contig_10	UbiA prenyltransferase family	UbiA	PF01040	85	356	112.4	2.7e-30
g242	Calca_contig_10	PAP2 superfamily	PAP2	PF01569	78	240	92.4	8.7e-25
g242	Calca_contig_10	PAP2 superfamily	PAP2	PF01569	78	240	94.3	7.8e-25
g244	Calca_contig_10	ACT domain	ACT	PF01842	5	50	31.3	1.6e-07
g244	Calca_contig_10	Formyl transferase	Formyl_trans_N	PF00551	89	266	129.5	1.1e-35
g244	Calca_contig_10	ACT domain	ACT	PF01842	5	70	32.9	2.4e-06
g244	Calca_contig_10	Formyl transferase	Formyl_trans_N	PF00551	89	266	131.4	5.1e-36
g246	Calca_contig_10	Amidase	Amidase	PF01425	82	526	404.8	2.6e-118
g246	Calca_contig_10	Amidase	Amidase	PF01425	82	526	406.6	7.3e-119
g247	Calca_contig_10	Major Facilitator Superfamily	MFS_1	PF07690	33	412	103.2	8.2e-28
g247	Calca_contig_10	Major Facilitator Superfamily	MFS_1	PF07690	33	412	105.1	4.2e-28
g248	Calca_contig_10	Isocitrate/isopropylmalate dehydrogenase	Iso_dh	PF00180	7	369	515.1	2.3e-155
g248	Calca_contig_10	Isocitrate/isopropylmalate dehydrogenase	Iso_dh	PF00180	7	369	517	4.4e-152
g249	Calca_contig_10	short chain dehydrogenase	adh_short	PF00106	9	172	80.4	1.6e-21
g249	Calca_contig_10	Aldehyde dehydrogenase family	Aldedh	PF00171	244	715	639.6	1.4e-195
g249	Calca_contig_10	short chain dehydrogenase	adh_short	PF00106	9	172	82.4	3e-21
g249	Calca_contig_10	Aldehyde dehydrogenase family	Aldedh	PF00171	244	715	640.3	3.2e-189
g250	Calca_contig_10	Amidohydrolase family	Amidohydro_3	PF07969	74	526	184.2	6.7e-52
g250	Calca_contig_10	Amidohydrolase family	Amidohydro_3	PF07969	74	526	186	1.9e-52
g251	Calca_contig_10	Major Facilitator Superfamily	MFS_1	PF07690	1	111	22.8	9.9e-06
g251	Calca_contig_10	Major Facilitator Superfamily	MFS_1	PF07690	178	365	22.8	9.9e-06
g251	Calca_contig_10	Sugar (and other) transporter	Sugar_tr	PF00083	2	377	287.4	5.7e-83
g251	Calca_contig_10	Sugar (and other) transporter	Sugar_tr	PF00083	2	377	179.6	1.6e-50
g258	Calca_contig_10	Cellulase (glycosyl hydrolase family 5)	Cellulase	PF00150	83	189	24.3	8.3e-07
g258	Calca_contig_10	Cellulase (glycosyl hydrolase family 5)	Cellulase	PF00150	64	367	-11.6	1.5e-05
g259	Calca_contig_10	Alcohol dehydrogenase GroES-like domain	ADH_N	PF08240	28	40	24.9	3.6e-06
g259	Calca_contig_10	Alcohol dehydrogenase GroES-like domain	ADH_N	PF08240	56	110	24.9	3.6e-06
g259	Calca_contig_10	Zinc-binding dehydrogenase	ADH_zinc_N	PF00107	147	237	57.7	5.3e-16
g259	Calca_contig_10	Alcohol dehydrogenase GroES-like domain	ADH_N	PF08240	28	110	19.1	4.8e-05
g259	Calca_contig_10	Zinc-binding dehydrogenase	ADH_zinc_N	PF00107	140	282	46.1	2.5e-10
g261	Calca_contig_10	Carbonic anhydrase	Pro_CA	PF00484	24	93	72	1.7e-19
g261	Calca_contig_10	Carbonic anhydrase	Pro_CA	PF00484	125	162	72	1.7e-19
g261	Calca_contig_10	Carbonic anhydrase	Pro_CA	PF00484	24	162	67.3	1.1e-16
g263	Calca_contig_10	Major Facilitator Superfamily	MFS_1	PF07690	175	280	24.3	3.9e-06
g263	Calca_contig_10	Major Facilitator Superfamily	MFS_1	PF07690	394	589	24.3	3.9e-06
g263	Calca_contig_10	Sugar (and other) transporter	Sugar_tr	PF00083	183	592	313.1	1e-90
g263	Calca_contig_10	Sugar (and other) transporter	Sugar_tr	PF00083	120	592	307.5	5.1e-89
g265	Calca_contig_10	CobQ/CobB/MinD/ParA nucleotide binding domain	CbiA	PF01656	10	138	28.4	7.5e-08
g265	Calca_contig_10	CobQ/CobB/MinD/ParA nucleotide binding domain	CbiA	PF01656	10	237	13.6	4.9e-06
g266	Calca_contig_10	Adenosylmethionine decarboxylase	SAM_decarbox	PF01536	32	451	373	9.4e-109
g266	Calca_contig_10	Adenosylmethionine decarboxylase	SAM_decarbox	PF01536	32	497	374.5	3.5e-109
g268	Calca_contig_10	Nin one binding (NOB1) Zn-ribbon like	NOB1_Zn_bind	PF08772	306	378	170.2	1.1e-47
g268	Calca_contig_10	Nin one binding (NOB1) Zn-ribbon like	NOB1_Zn_bind	PF08772	306	378	172.1	2.8e-48
g270	Calca_contig_11	Phosphotransferase enzyme family	APH	PF01636	70	126	20.4	2.5e-05
g271	Calca_contig_11	NADH:flavin oxidoreductase / NADH oxidase family	Oxidored_FMN	PF00724	4	337	351.3	1.2e-108
g271	Calca_contig_11	NADH:flavin oxidoreductase / NADH oxidase family	Oxidored_FMN	PF00724	4	337	353.2	9e-103
g278	Calca_contig_11	FAD dependent oxidoreductase	DAO	PF01266	10	39	15.1	0.00089
g278	Calca_contig_11	FAD binding domain	FAD_binding_3	PF01494	8	29	21.7	3.8e-06
g278	Calca_contig_11	FAD binding domain	FAD_binding_3	PF01494	298	337	21.7	3.8e-06
g278	Calca_contig_11	Pyridine nucleotide-disulphide oxidoreductase	Pyr_redox_2	PF07992	10	59	16.7	0.00079
g278	Calca_contig_11	FAD binding domain	FAD_binding_3	PF01494	8	366	-77.4	5.7e-07
g279	Calca_contig_11	Secretory lipase	LIP	PF03583	150	428	-70.1	2.3e-05
g281	Calca_contig_11	F-box domain	F-box	PF00646	211	258	18	0.00075
g282	Calca_contig_11	Fungal specific transcription factor domain	Fungal_trans	PF04082	562	670	27.8	1.3e-07
g282	Calca_contig_11	WD domain, G-beta repeat	WD40	PF00400	972	1010	97.4	4.9e-26
g282	Calca_contig_11	WD domain, G-beta repeat	WD40	PF00400	1032	1070	97.4	4.9e-26
g282	Calca_contig_11	WD domain, G-beta repeat	WD40	PF00400	1078	1117	97.4	4.9e-26
g282	Calca_contig_11	WD domain, G-beta repeat	WD40	PF00400	1123	1159	97.4	4.9e-26
g282	Calca_contig_11	Fungal Zn(2)-Cys(6) binuclear cluster domain	Zn_clus	PF00172	326	352	25.1	4.3e-07
g282	Calca_contig_11	Fungal specific transcription factor domain	Fungal_trans	PF04082	562	670	29.7	2.1e-05
g282	Calca_contig_11	WD domain, G-beta repeat	WD40	PF00400	972	1010	104.6	5.9e-28
g282	Calca_contig_11	WD domain, G-beta repeat	WD40	PF00400	1032	1070	104.6	5.9e-28
g282	Calca_contig_11	WD domain, G-beta repeat	WD40	PF00400	1078	1117	104.6	5.9e-28
g282	Calca_contig_11	WD domain, G-beta repeat	WD40	PF00400	1123	1159	104.6	5.9e-28
g282	Calca_contig_11	WD domain, G-beta repeat	WD40	PF00400	1163	1199	104.6	5.9e-28
g282	Calca_contig_11	Fungal Zn(2)-Cys(6) binuclear cluster domain	Zn_clus	PF00172	326	364	22.9	0.00054
g283	Calca_contig_11	Glycolipid 2-alpha-mannosyltransferase	Glyco_transf_15	PF01793	66	354	500.2	4.8e-147
g283	Calca_contig_11	Glycolipid 2-alpha-mannosyltransferase	Glyco_transf_15	PF01793	6	354	498.6	1.6e-146
g285	Calca_contig_11	Spc97 / Spc98 family	Spc97_Spc98	PF04130	231	247	16.8	6.2e-05
g285	Calca_contig_11	Spc97 / Spc98 family	Spc97_Spc98	PF04130	625	673	16.8	6.2e-05
g285	Calca_contig_11	Spc97 / Spc98 family	Spc97_Spc98	PF04130	231	724	-62.6	5.3e-07
g288	Calca_contig_11	LCCL domain	LCCL	PF03815	313	370	48	3.3e-13
g288	Calca_contig_11	LCCL domain	LCCL	PF03815	253	370	21.8	8.1e-06
g289	Calca_contig_11	Queuine tRNA-ribosyltransferase	TGT	PF01702	340	385	32	2.4e-08
g289	Calca_contig_11	Queuine tRNA-ribosyltransferase	TGT	PF01702	153	403	-80.8	1.1e-05
g290	Calca_contig_11	Alkaline phosphatase	Alk_phosphatase	PF00245	166	382	175.3	3.1e-49
g290	Calca_contig_11	Alkaline phosphatase	Alk_phosphatase	PF00245	411	493	175.3	3.1e-49
g290	Calca_contig_11	Alkaline phosphatase	Alk_phosphatase	PF00245	610	646	175.3	3.1e-49
g290	Calca_contig_11	Alkaline phosphatase	Alk_phosphatase	PF00245	166	646	148.9	2.8e-41
g294	Calca_contig_11	CutC family	CutC	PF03932	4	220	115.7	1.5e-32
g294	Calca_contig_11	CutC family	CutC	PF03932	4	220	117.6	7.4e-32
g296	Calca_contig_11	Prophage maintenance system killer protein	DOC	PF05012	31	92	40.6	8.2e-11
g296	Calca_contig_11	Prophage maintenance system killer protein	DOC	PF05012	8	129	31.2	1.6e-06
g298	Calca_contig_11	Nucleosome assembly protein (NAP)	NAP	PF00956	95	121	18.1	0.00022
g298	Calca_contig_11	Nucleosome assembly protein (NAP)	NAP	PF00956	234	279	18.1	0.00022
g298	Calca_contig_11	Nucleosome assembly protein (NAP)	NAP	PF00956	2	279	-55.8	1e-06
g301	Calca_contig_11	Periodic tryptophan protein 2 WD repeat associated presumed domain	PWP2	PF04047	741	856	224.5	4.9e-64
g301	Calca_contig_11	WD domain, G-beta repeat	WD40	PF00400	97	123	191.8	3.4e-54
g301	Calca_contig_11	WD domain, G-beta repeat	WD40	PF00400	141	179	191.8	3.4e-54
g301	Calca_contig_11	WD domain, G-beta repeat	WD40	PF00400	185	219	191.8	3.4e-54
g301	Calca_contig_11	WD domain, G-beta repeat	WD40	PF00400	260	288	191.8	3.4e-54
g301	Calca_contig_11	WD domain, G-beta repeat	WD40	PF00400	335	373	191.8	3.4e-54
g301	Calca_contig_11	WD domain, G-beta repeat	WD40	PF00400	377	415	191.8	3.4e-54
g301	Calca_contig_11	WD domain, G-beta repeat	WD40	PF00400	434	451	191.8	3.4e-54
g301	Calca_contig_11	WD domain, G-beta repeat	WD40	PF00400	463	501	191.8	3.4e-54
g301	Calca_contig_11	WD domain, G-beta repeat	WD40	PF00400	515	543	191.8	3.4e-54
g301	Calca_contig_11	WD domain, G-beta repeat	WD40	PF00400	567	605	191.8	3.4e-54
g301	Calca_contig_11	Periodic tryptophan protein 2 WD repeat associated presumed domain	PWP2	PF04047	741	856	226.5	1.2e-64
g301	Calca_contig_11	WD domain, G-beta repeat	WD40	PF00400	44	83	214.9	3.9e-61
g301	Calca_contig_11	WD domain, G-beta repeat	WD40	PF00400	87	123	214.9	3.9e-61
g301	Calca_contig_11	WD domain, G-beta repeat	WD40	PF00400	141	179	214.9	3.9e-61
g301	Calca_contig_11	WD domain, G-beta repeat	WD40	PF00400	185	221	214.9	3.9e-61
g301	Calca_contig_11	WD domain, G-beta repeat	WD40	PF00400	251	288	214.9	3.9e-61
g301	Calca_contig_11	WD domain, G-beta repeat	WD40	PF00400	335	373	214.9	3.9e-61
g301	Calca_contig_11	WD domain, G-beta repeat	WD40	PF00400	377	415	214.9	3.9e-61
g301	Calca_contig_11	WD domain, G-beta repeat	WD40	PF00400	463	501	214.9	3.9e-61
g301	Calca_contig_11	WD domain, G-beta repeat	WD40	PF00400	505	543	214.9	3.9e-61
g301	Calca_contig_11	WD domain, G-beta repeat	WD40	PF00400	567	605	214.9	3.9e-61
g301	Calca_contig_11	WD domain, G-beta repeat	WD40	PF00400	667	704	214.9	3.9e-61
g304	Calca_contig_11	Septin	Septin	PF00735	28	308	540.1	2e-159
g304	Calca_contig_11	Septin	Septin	PF00735	28	308	542	1.3e-159
g306	Calca_contig_11	Histidine kinase-, DNA gyrase B-, and HSP90-like ATPase	HATPase_c	PF02518	217	282	34.9	3.8e-09
g306	Calca_contig_11	Histidine kinase-, DNA gyrase B-, and HSP90-like ATPase	HATPase_c	PF02518	344	382	34.9	3.8e-09
g306	Calca_contig_11	Histidine kinase-, DNA gyrase B-, and HSP90-like ATPase	HATPase_c	PF02518	217	382	31.1	8.2e-06
g307	Calca_contig_11	MATH domain	MATH	PF00917	102	203	30.7	1.5e-07
g307	Calca_contig_11	Ubiquitin carboxyl-terminal hydrolase	UCH	PF00443	248	569	272.9	3.2e-88
g307	Calca_contig_11	MATH domain	MATH	PF00917	102	227	29.2	3.1e-05
g307	Calca_contig_11	Ubiquitin carboxyl-terminal hydrolase	UCH	PF00443	248	569	274.7	3.8e-79
g309	Calca_contig_11	Ankyrin repeat	Ank	PF00023		486	45	2.7e-11
g309	Calca_contig_11	Ankyrin repeat	Ank	PF00023	487	519	45	2.7e-11
g309	Calca_contig_11	Asparaginase	Asparaginase	PF00710	28	50	295.3	2.1e-90
g309	Calca_contig_11	Asparaginase	Asparaginase	PF00710	105	381	295.3	2.1e-90
g309	Calca_contig_11	Ankyrin repeat	Ank	PF00023	419	452	49.1	3e-11
g309	Calca_contig_11	Ankyrin repeat	Ank	PF00023		486	49.1	3e-11
g309	Calca_contig_11	Ankyrin repeat	Ank	PF00023	487	519	49.1	3e-11
g309	Calca_contig_11	Asparaginase	Asparaginase	PF00710	28	381	297.4	5.4e-86
g311	Calca_contig_11	Protein kinase domain	Pkinase	PF00069	37	339	287.2	6.7e-83
g311	Calca_contig_11	Protein tyrosine kinase	Pkinase_Tyr	PF07714	37	245	86.2	1.6e-24
g311	Calca_contig_11	Protein kinase domain	Pkinase	PF00069	37	339	289.1	1.7e-83
g311	Calca_contig_11	Protein tyrosine kinase	Pkinase_Tyr	PF07714	37	339	37.1	2.3e-14
g314	Calca_contig_11	Glycosyl hydrolase family 20, catalytic domain	Glyco_hydro_20	PF00728	190	529	420.5	5e-123
g314	Calca_contig_11	Glycosyl hydrolase family 20, domain 2	Glyco_hydro_20b	PF02838	131	188	35.8	1.1e-10
g314	Calca_contig_11	Glycosyl hydrolase family 20, catalytic domain	Glyco_hydro_20	PF00728	190	529	422.3	1.4e-123
g314	Calca_contig_11	Glycosyl hydrolase family 20, domain 2	Glyco_hydro_20b	PF02838	48	188	8.3	0.00073
g315	Calca_contig_11	5'-AMP-activated protein kinase, beta subunit, complex-interacting region	AMPKBI	PF04739	373	460	100.7	3.4e-27
g315	Calca_contig_11	5'-AMP-activated protein kinase, beta subunit, complex-interacting region	AMPKBI	PF04739	373	460	102.4	2.8e-27
g317	Calca_contig_11	Glycoprotease family	Peptidase_M22	PF00814	34	312	187.2	3.8e-54
g317	Calca_contig_11	Glycoprotease family	Peptidase_M22	PF00814	34	312	189.1	2.3e-53
g321	Calca_contig_11	EF hand	efhand	PF00036	41	58	68.3	3.1e-17
g321	Calca_contig_11	EF hand	efhand	PF00036	62	90	68.3	3.1e-17
g321	Calca_contig_11	EF hand	efhand	PF00036	99	127	68.3	3.1e-17
g321	Calca_contig_11	EF hand	efhand	PF00036	140	168	68.3	3.1e-17
g321	Calca_contig_11	EF hand	efhand	PF00036	62	90	68.6	4.1e-17
g321	Calca_contig_11	EF hand	efhand	PF00036	99	127	68.6	4.1e-17
g321	Calca_contig_11	EF hand	efhand	PF00036	140	168	68.6	4.1e-17
g323	Calca_contig_11	Ribosomal protein S9/S16	Ribosomal_S9	PF00380	197	317	143.7	2.7e-44
g323	Calca_contig_11	Ribosomal protein S9/S16	Ribosomal_S9	PF00380	197	317	145.6	2.8e-40
g324	Calca_contig_11	Elongation factor 1 gamma, conserved domain	EF1G	PF00647	244	349	188.9	5e-54
g324	Calca_contig_11	Glutathione S-transferase, C-terminal domain	GST_C	PF00043	104	196	68.8	4.6e-19
g324	Calca_contig_11	Glutathione S-transferase, N-terminal domain	GST_N	PF02798	2	75	30.5	4.9e-07
g324	Calca_contig_11	Elongation factor 1 gamma, conserved domain	EF1G	PF00647	244	349	190.8	6.6e-54
g324	Calca_contig_11	Glutathione S-transferase, C-terminal domain	GST_C	PF00043	104	196	70.7	9.4e-18
g324	Calca_contig_11	Glutathione S-transferase, N-terminal domain	GST_N	PF02798	2	75	32.4	3.4e-06
g327	Calca_contig_11	Domain of unknown function (DUF947)	DUF947	PF06102	137	302	228	4.3e-65
g327	Calca_contig_11	Domain of unknown function (DUF947)	DUF947	PF06102	137	302	229.8	1.2e-65
g328	Calca_contig_11	ABC1 family	ABC1	PF03109	389	507	154.7	5.1e-43
g328	Calca_contig_11	ABC1 family	ABC1	PF03109	389	507	156.6	1.3e-43
g330	Calca_contig_11	Calcineurin-like phosphoesterase	Metallophos	PF00149	415	613	121.1	6.7e-33
g330	Calca_contig_11	PPP5	PPP5	PF08321	317	409	180.2	6.6e-62
g330	Calca_contig_11	Transcription elongation protein Spt4	Spt4	PF06093	834	938	166	2.1e-46
g330	Calca_contig_11	Tetratricopeptide repeat	TPR_1	PF00515	210	243	74.9	6.3e-20
g330	Calca_contig_11	Tetratricopeptide repeat	TPR_1	PF00515	244	277	74.9	6.3e-20
g330	Calca_contig_11	Tetratricopeptide repeat	TPR_1	PF00515	278	311	74.9	6.3e-20
g330	Calca_contig_11	Tetratricopeptide repeat	TPR_2	PF07719	210	243	56.9	1.4e-14
g330	Calca_contig_11	Tetratricopeptide repeat	TPR_2	PF07719	244	277	56.9	1.4e-14
g330	Calca_contig_11	Tetratricopeptide repeat	TPR_2	PF07719	278	311	56.9	1.4e-14
g330	Calca_contig_11	Calcineurin-like phosphoesterase	Metallophos	PF00149	415	613	123.1	1.7e-33
g330	Calca_contig_11	PPP5	PPP5	PF08321	317	409	182.2	2.6e-51
g330	Calca_contig_11	Transcription elongation protein Spt4	Spt4	PF06093	834	938	168	5.1e-47
g330	Calca_contig_11	Tetratricopeptide repeat	TPR_1	PF00515	210	243	80.9	8.4e-21
g330	Calca_contig_11	Tetratricopeptide repeat	TPR_1	PF00515	244	277	80.9	8.4e-21
g330	Calca_contig_11	Tetratricopeptide repeat	TPR_1	PF00515	278	311	80.9	8.4e-21
g330	Calca_contig_11	Tetratricopeptide repeat	TPR_2	PF07719	210	243	62.9	2.2e-15
g330	Calca_contig_11	Tetratricopeptide repeat	TPR_2	PF07719	244	277	62.9	2.2e-15
g330	Calca_contig_11	Tetratricopeptide repeat	TPR_2	PF07719	278	311	62.9	2.2e-15
g333	Calca_contig_11	Family of unknown function (DUF572)	DUF572	PF04502	1	263	205.8	2.1e-58
g333	Calca_contig_11	Family of unknown function (DUF572)	DUF572	PF04502	1	297	172	3.2e-48
g335	Calca_contig_11	Pyridine nucleotide-disulphide oxidoreductase	Pyr_redox	PF00070	85	119	26.9	5.1e-07
g335	Calca_contig_11	Pyridine nucleotide-disulphide oxidoreductase	Pyr_redox	PF00070	153	223	26.9	5.1e-07
g335	Calca_contig_11	Pyridine nucleotide-disulphide oxidoreductase	Pyr_redox	PF00070	153	255	19.1	0.00017
g335	Calca_contig_11	Pyridine nucleotide-disulphide oxidoreductase	Pyr_redox_2	PF07992	4	299	1.2	4.4e-05
g337	Calca_contig_11	Mediator complex subunit Med5	Med5	PF08689	164	889	863.6	2.5e-260
g337	Calca_contig_11	Mediator complex subunit Med5	Med5	PF08689	164	889	865.4	5.6e-257
g339	Calca_contig_11	Helicase conserved C-terminal domain	Helicase_C	PF00271	1298	1330	24.5	4.3e-06
g339	Calca_contig_11	SNF2 family N-terminal domain	SNF2_N	PF00176	260	523	56	5.8e-15
g339	Calca_contig_11	Zinc finger, C3HC4 type (RING finger)	zf-C3HC4	PF00097	1121	1158	29.3	7.9e-10
g339	Calca_contig_11	SNF2 family N-terminal domain	SNF2_N	PF00176	260	637	39.3	1e-10
g339	Calca_contig_11	Zinc finger, C3HC4 type (RING finger)	zf-C3HC4	PF00097	1121	1158	31	8.6e-06
g340	Calca_contig_11	Translocon-associated protein (TRAP), alpha subunit	TRAP_alpha	PF03896	1	276	-80.9	2.4e-05
g341	Calca_contig_11	IGR protein motif	IGR	PF09597	48	104	115.3	5.6e-37
g341	Calca_contig_11	IGR protein motif	IGR	PF09597	48	104	117.2	9.6e-32
g342	Calca_contig_12	Glycosyltransferase sugar-binding region containing DXD motif	Gly_transf_sug	PF04488	157	207	33.3	3.6e-09
g342	Calca_contig_12	Glycosyltransferase sugar-binding region containing DXD motif	Gly_transf_sug	PF04488	122	207	21.3	0.00046
g344	Calca_contig_12	Methyltransferase domain	Methyltransf_11	PF08241	78	136	30	4.3e-07
g344	Calca_contig_12	Methyltransferase domain	Methyltransf_11	PF08241	175	186	30	4.3e-07
g344	Calca_contig_12	O-methyltransferase	Methyltransf_3	PF01596	56	254	83.8	2.7e-24
g344	Calca_contig_12	O-methyltransferase	Methyltransf_3	PF01596	29	254	84.9	5.2e-22
g345	Calca_contig_12	Glutathione S-transferase, C-terminal domain	GST_C	PF00043	137	216	29.4	1.3e-07
g345	Calca_contig_12	Glutathione S-transferase, N-terminal domain	GST_N	PF02798	6	80	45.7	4.4e-11
g345	Calca_contig_12	Glutathione S-transferase, C-terminal domain	GST_C	PF00043	124	216	26.5	0.00019
g345	Calca_contig_12	Glutathione S-transferase, N-terminal domain	GST_N	PF02798	6	80	47.5	9.1e-11
g347	Calca_contig_12	Cytochrome P450	p450	PF00067	8	359	101	8.4e-31
g347	Calca_contig_12	Cytochrome P450	p450	PF00067	1	382	-22.9	8.4e-12
g348	Calca_contig_12	short chain dehydrogenase	adh_short	PF00106	41	198	53.3	5e-14
g348	Calca_contig_12	short chain dehydrogenase	adh_short	PF00106	41	217	51.4	6.3e-12
g349	Calca_contig_12	NmrA-like family	NmrA	PF05368	60	143	27.7	2e-07
g349	Calca_contig_12	NmrA-like family	NmrA	PF05368	11	229	-27.5	1.6e-06
g350	Calca_contig_12	Myb-like DNA-binding domain	Myb_DNA-binding	PF00249	2	19	52.7	4.9e-13
g350	Calca_contig_12	Myb-like DNA-binding domain	Myb_DNA-binding	PF00249	24	58	52.7	4.9e-13
g350	Calca_contig_12	Myb-like DNA-binding domain	Myb_DNA-binding	PF00249	61	100	52.7	4.9e-13
g350	Calca_contig_12	Myb-like DNA-binding domain	Myb_DNA-binding	PF00249	24	58	26.9	0.00015
g350	Calca_contig_12	Myb-like DNA-binding domain	Myb_DNA-binding	PF00249	59	100	26.9	0.00015
g353	Calca_contig_12	Glutathione S-transferase, N-terminal domain	GST_N	PF02798	4	84	51.6	1.1e-12
g353	Calca_contig_12	Glutathione S-transferase, N-terminal domain	GST_N	PF02798	4	84	53.5	1.4e-12
g354	Calca_contig_12	Arabidopsis proteins of unknown function	DUF239	PF03080	125	331	82.3	6.7e-25
g354	Calca_contig_12	Arabidopsis proteins of unknown function	DUF239	PF03080	125	331	84.2	8.2e-22
g356	Calca_contig_12	Eukaryotic protein of unknown function (DUF895)	DUF895	PF05978	24	96	18.3	0.00033
g356	Calca_contig_12	Eukaryotic protein of unknown function (DUF895)	DUF895	PF05978	8	140	-21.1	6.1e-06
g359	Calca_contig_12	Major Facilitator Superfamily	MFS_1	PF07690	62	428	115.7	2.7e-31
g359	Calca_contig_12	Major Facilitator Superfamily	MFS_1	PF07690	62	428	117.6	7.3e-32
g360	Calca_contig_12	Cytochrome P450	p450	PF00067	119	413	102.4	3.1e-31
g360	Calca_contig_12	Cytochrome P450	p450	PF00067	438	477	102.4	3.1e-31
g360	Calca_contig_12	Cytochrome P450	p450	PF00067	34	497	63.2	1.8e-16
g361	Calca_contig_12	Fungal specific transcription factor domain	Fungal_trans	PF04082	271	362	63.4	2.6e-18
g361	Calca_contig_12	Fungal specific transcription factor domain	Fungal_trans	PF04082	271	362	65.3	4.2e-16
g362	Calca_contig_12	ABC transporter transmembrane region	ABC_membrane	PF00664	53	330	226.9	9.3e-65
g362	Calca_contig_12	ABC transporter transmembrane region	ABC_membrane	PF00664	719	985	226.9	9.3e-65
g362	Calca_contig_12	ABC transporter	ABC_tran	PF00005	405	601	380.9	4e-111
g362	Calca_contig_12	ABC transporter	ABC_tran	PF00005	1060	1246	380.9	4e-111
g362	Calca_contig_12	ABC transporter transmembrane region	ABC_membrane	PF00664	53	330	224.8	4e-64
g362	Calca_contig_12	ABC transporter transmembrane region	ABC_membrane	PF00664	694	985	224.8	4e-64
g362	Calca_contig_12	ABC transporter	ABC_tran	PF00005	405	601	384.6	3e-112
g362	Calca_contig_12	ABC transporter	ABC_tran	PF00005	1060	1246	384.6	3e-112
g362	Calca_contig_12	RecF/RecN/SMC N terminal domain	SMC_N	PF02463	389	605	-101.6	0.00071
g364	Calca_contig_12	Major Facilitator Superfamily	MFS_1	PF07690	67	451	167.4	7.7e-47
g364	Calca_contig_12	Sugar (and other) transporter	Sugar_tr	PF00083	95	240	24	2.4e-06
g364	Calca_contig_12	Major Facilitator Superfamily	MFS_1	PF07690	67	451	169.3	2.1e-47
g364	Calca_contig_12	Sugar (and other) transporter	Sugar_tr	PF00083	61	488	-37.6	3.2e-07
g367	Calca_contig_13	XRN 5'-3' exonuclease N-terminus	XRN_N	PF03159	1	261	602	7.4e-193
g367	Calca_contig_13	XRN 5'-3' exonuclease N-terminus	XRN_N	PF03159	311	319	602	7.4e-193
g367	Calca_contig_13	XRN 5'-3' exonuclease N-terminus	XRN_N	PF03159	1	261	602.8	6.6e-178
g369	Calca_contig_13	Uso1 / p115 like vesicle tethering protein, C terminal region	Uso1_p115_C	PF04871	889	939	45.6	6.2e-11
g369	Calca_contig_13	Uso1 / p115 like vesicle tethering protein, head region	Uso1_p115_head	PF04869	339	649	305	7.7e-89
g369	Calca_contig_13	Uso1 / p115 like vesicle tethering protein, C terminal region	Uso1_p115_C	PF04871	814	939	26.5	0.00019
g369	Calca_contig_13	Uso1 / p115 like vesicle tethering protein, head region	Uso1_p115_head	PF04869	338	649	306.1	1.4e-88
g370	Calca_contig_13	Methyltransferase domain	Methyltransf_11	PF08241	233	304	31	2.2e-07
g370	Calca_contig_13	Methyltransferase domain	Methyltransf_12	PF08242	233	331	26.1	5e-06
g370	Calca_contig_13	Ribosomal protein L11 methyltransferase (PrmA)	PrmA	PF06325	232	300	21.9	6.2e-06
g370	Calca_contig_13	Methyltransferase domain	Methyltransf_11	PF08241	233	333	25.5	0.00039
g370	Calca_contig_13	Methyltransferase domain	Methyltransf_12	PF08242	233	331	28	7e-05
g371	Calca_contig_13	OPT oligopeptide transporter protein	OPT	PF03169	26	697	460.3	5.1e-135
g371	Calca_contig_13	OPT oligopeptide transporter protein	OPT	PF03169	26	697	462.1	1.5e-135
g374	Calca_contig_13	tRNA synthetases class I (I, L, M and V)	tRNA-synt_1	PF00133	33	105	98.3	1.1e-26
g374	Calca_contig_13	tRNA synthetases class I (I, L, M and V)	tRNA-synt_1	PF00133	110	153	98.3	1.1e-26
g375	Calca_contig_13	Mo25-like	Mo25	PF08569	1	365	669.4	5.9e-198
g375	Calca_contig_13	Mo25-like	Mo25	PF08569	1	365	671.3	1.5e-198
g376	Calca_contig_13	SWIB/MDM2 domain	SWIB	PF02201	281	338	32.9	1.3e-08
g376	Calca_contig_13	SWIB/MDM2 domain	SWIB	PF02201	281	357	33.5	1.5e-06
g377	Calca_contig_13	Protein kinase domain	Pkinase	PF00069	186	462	306.9	7.5e-89
g377	Calca_contig_13	Protein tyrosine kinase	Pkinase_Tyr	PF07714	186	330	34.8	1.2e-09
g377	Calca_contig_13	Protein kinase domain	Pkinase	PF00069	186	462	308.8	2.1e-89
g377	Calca_contig_13	Protein tyrosine kinase	Pkinase_Tyr	PF07714	186	462	17.1	3.8e-13
g378	Calca_contig_13	Dehydrogenase E1 component	E1_dh	PF00676	274	600	209.7	1.4e-59
g378	Calca_contig_13	Transketolase, pyrimidine binding domain	Transket_pyr	PF02779	667	880	224.6	2.5e-65
g378	Calca_contig_13	Dehydrogenase E1 component	E1_dh	PF00676	274	600	211.7	3.5e-60
g378	Calca_contig_13	Transketolase, pyrimidine binding domain	Transket_pyr	PF02779	667	880	226.6	1.1e-64
g380	Calca_contig_13	Transcription factor TFIID (or TATA-binding protein, TBP)	TBP	PF00352	75	160	293.9	6.1e-85
g380	Calca_contig_13	Transcription factor TFIID (or TATA-binding protein, TBP)	TBP	PF00352	165	251	293.9	6.1e-85
g380	Calca_contig_13	Transcription factor TFIID (or TATA-binding protein, TBP)	TBP	PF00352	75	160	297.9	3.9e-86
g380	Calca_contig_13	Transcription factor TFIID (or TATA-binding protein, TBP)	TBP	PF00352	165	251	297.9	3.9e-86
g381	Calca_contig_13	FAD dependent oxidoreductase	DAO	PF01266	9	411	115.9	5e-32
g381	Calca_contig_13	Pyridine nucleotide-disulphide oxidoreductase	Pyr_redox	PF00070	9	29	16.4	0.00067
g381	Calca_contig_13	Pyridine nucleotide-disulphide oxidoreductase	Pyr_redox	PF00070	209	231	16.4	0.00067
g381	Calca_contig_13	FAD dependent oxidoreductase	DAO	PF01266	9	411	117.8	6.5e-32
g389	Calca_contig_13	2-nitropropane dioxygenase	NPD	PF03060	4	227	161.8	2.7e-47
g389	Calca_contig_13	2-nitropropane dioxygenase	NPD	PF03060	279	312	161.8	2.7e-47
g389	Calca_contig_13	2-nitropropane dioxygenase	NPD	PF03060	4	312	163.7	9.6e-46
g393	Calca_contig_16	Integrase core domain	rve	PF00665	11	69	31.5	6.1e-08
g393	Calca_contig_16	Reverse transcriptase (RNA-dependent DNA polymerase)	RVT_2	PF07727	363	376	62.9	4.4e-18
g393	Calca_contig_16	Reverse transcriptase (RNA-dependent DNA polymerase)	RVT_2	PF07727	388	442	62.9	4.4e-18
g393	Calca_contig_16	Reverse transcriptase (RNA-dependent DNA polymerase)	RVT_2	PF07727	330	442	-139.2	2.1e-05
g396	Calca_contig_20	Peptidase family M1	Peptidase_M1	PF01433	14	406	565.2	1.4e-197
g396	Calca_contig_20	Peptidase family M1	Peptidase_M1	PF01433	14	406	567.1	3.6e-167
g397	Calca_contig_20	Peptidase A4 family	Peptidase_A4	PF01828	39	235	188	2.2e-58
g397	Calca_contig_20	Peptidase A4 family	Peptidase_A4	PF01828	38	235	188.7	2.9e-53
g398	Calca_contig_20	Melibiase	Melibiase	PF02065	28	157	37	3.8e-09
g398	Calca_contig_20	Melibiase	Melibiase	PF02065	1	384	-95.4	4.3e-10
g401	Calca_contig_20	OPT oligopeptide transporter protein	OPT	PF03169	99	753	726.5	3.6e-215
g401	Calca_contig_20	OPT oligopeptide transporter protein	OPT	PF03169	99	753	728.4	9.9e-216
g402	Calca_contig_20	ABC transporter transmembrane region	ABC_membrane	PF00664	369	543	72.6	1.1e-18
g402	Calca_contig_20	ABC transporter transmembrane region	ABC_membrane	PF00664	854	1100	72.6	1.1e-18
g402	Calca_contig_20	ABC transporter	ABC_tran	PF00005	639	754	182.4	2.3e-51
g402	Calca_contig_20	ABC transporter	ABC_tran	PF00005	1160	1329	182.4	2.3e-51
g402	Calca_contig_20	Glyoxalase/Bleomycin resistance protein/Dioxygenase superfamily	Glyoxalase	PF00903	1340	1459	36.3	6.1e-10
g402	Calca_contig_20	ABC transporter transmembrane region	ABC_membrane	PF00664	265	543	60.5	1.2e-14
g402	Calca_contig_20	ABC transporter transmembrane region	ABC_membrane	PF00664	835	1100	60.5	1.2e-14
g402	Calca_contig_20	ABC transporter	ABC_tran	PF00005	617	754	125.2	3.7e-34
g402	Calca_contig_20	ABC transporter	ABC_tran	PF00005	1160	1329	125.2	3.7e-34
g402	Calca_contig_20	Glyoxalase/Bleomycin resistance protein/Dioxygenase superfamily	Glyoxalase	PF00903	1340	1459	38.1	6.3e-08
g404	Calca_contig_20	Methyltransferase domain	Methyltransf_11	PF08241	64	157	64.9	1.7e-16
g404	Calca_contig_20	Methyltransferase domain	Methyltransf_12	PF08242	64	132	36.5	8.2e-09
g404	Calca_contig_20	Methyltransferase domain	Methyltransf_11	PF08241	64	157	66.8	1.5e-16
g404	Calca_contig_20	Methyltransferase domain	Methyltransf_12	PF08242	64	155	35.8	3.1e-07
g405	Calca_contig_20	Flavin containing amine oxidoreductase	Amino_oxidase	PF01593	11	33	17.4	0.00017
g405	Calca_contig_20	FAD dependent oxidoreductase	DAO	PF01266	3	31	24.5	2.1e-06
g405	Calca_contig_20	FAD binding domain	FAD_binding_2	PF00890	3	29	23.3	2e-06
g405	Calca_contig_20	Pyridine nucleotide-disulphide oxidoreductase	Pyr_redox_2	PF07992	3	31	27.7	9.7e-07
g405	Calca_contig_20	FAD binding domain	FAD_binding_3	PF01494	1	369	-110.2	6.6e-05
g409	Calca_contig_20	Fungal hydrophobin	Hydrophobin	PF01185	4	130	15.8	0.00067
g409	Calca_contig_20	Fungal hydrophobin	Hydrophobin	PF01185	4	130	17.6	5.2e-05
g413	Calca_contig_20	Berberine and berberine like	BBE	PF08031	436	457	21.9	3.5e-05
g413	Calca_contig_20	FAD binding domain	FAD_binding_4	PF01565	42	177	143.4	1.3e-39
g413	Calca_contig_20	Berberine and berberine like	BBE	PF08031	421	463	19.4	0.00049
g413	Calca_contig_20	FAD binding domain	FAD_binding_4	PF01565	42	177	145.4	3.3e-40
g414	Calca_contig_20	Gamma-glutamyltranspeptidase	G_glu_transpept	PF01019	45	595	653.7	3.2e-193
g414	Calca_contig_20	Gamma-glutamyltranspeptidase	G_glu_transpept	PF01019	45	595	655.6	8.3e-194
g415	Calca_contig_20	Glutaredoxin	Glutaredoxin	PF00462	61	128	101.9	1.6e-28
g415	Calca_contig_20	Glutaredoxin	Glutaredoxin	PF00462	61	128	103.6	1.2e-27
g417	Calca_contig_20	Tetratricopeptide repeat	TPR_1	PF00515	808	841	38.7	1.2e-09
g417	Calca_contig_20	Tetratricopeptide repeat	TPR_1	PF00515	850	878	38.7	1.2e-09
g417	Calca_contig_20	Tetratricopeptide repeat	TPR_1	PF00515	892	920	38.7	1.2e-09
g417	Calca_contig_20	Tetratricopeptide repeat	TPR_1	PF00515	939	962	38.7	1.2e-09
g417	Calca_contig_20	Tetratricopeptide repeat	TPR_1	PF00515	982	1004	38.7	1.2e-09
g417	Calca_contig_20	Tetratricopeptide repeat	TPR_1	PF00515	1024	1046	38.7	1.2e-09
g417	Calca_contig_20	Tetratricopeptide repeat	TPR_2	PF07719	766	794	36.5	7.4e-09
g417	Calca_contig_20	Tetratricopeptide repeat	TPR_2	PF07719	808	841	36.5	7.4e-09
g417	Calca_contig_20	Tetratricopeptide repeat	TPR_2	PF07719	850	878	36.5	7.4e-09
g417	Calca_contig_20	Tetratricopeptide repeat	TPR_2	PF07719	892	920	36.5	7.4e-09
g417	Calca_contig_20	Tetratricopeptide repeat	TPR_2	PF07719	939	962	36.5	7.4e-09
g417	Calca_contig_20	Tetratricopeptide repeat	TPR_2	PF07719	976	1004	36.5	7.4e-09
g417	Calca_contig_20	Tetratricopeptide repeat	TPR_2	PF07719	1023	1046	36.5	7.4e-09
g417	Calca_contig_20	Tetratricopeptide repeat	TPR_4	PF07721	808	833	23.5	3.7e-05
g417	Calca_contig_20	Tetratricopeptide repeat	TPR_4	PF07721	850	875	23.5	3.7e-05
g417	Calca_contig_20	Tetratricopeptide repeat	TPR_4	PF07721	892	917	23.5	3.7e-05
g417	Calca_contig_20	Tetratricopeptide repeat	TPR_4	PF07721	934	959	23.5	3.7e-05
g417	Calca_contig_20	Tetratricopeptide repeat	TPR_4	PF07721	976	1001	23.5	3.7e-05
g417	Calca_contig_20	Tetratricopeptide repeat	TPR_4	PF07721	1018	1043	23.5	3.7e-05
g417	Calca_contig_20	Tetratricopeptide repeat	TPR_1	PF00515	808	841	31.4	6.6e-06
g417	Calca_contig_20	Tetratricopeptide repeat	TPR_1	PF00515	850	883	31.4	6.6e-06
g417	Calca_contig_20	Tetratricopeptide repeat	TPR_1	PF00515	892	925	31.4	6.6e-06
g417	Calca_contig_20	Tetratricopeptide repeat	TPR_1	PF00515	934	967	31.4	6.6e-06
g417	Calca_contig_20	Tetratricopeptide repeat	TPR_1	PF00515	976	1009	31.4	6.6e-06
g417	Calca_contig_20	Tetratricopeptide repeat	TPR_1	PF00515	1018	1051	31.4	6.6e-06
g417	Calca_contig_20	Tetratricopeptide repeat	TPR_2	PF07719	766	799	45.7	3.3e-10
g417	Calca_contig_20	Tetratricopeptide repeat	TPR_2	PF07719	808	841	45.7	3.3e-10
g417	Calca_contig_20	Tetratricopeptide repeat	TPR_2	PF07719	850	883	45.7	3.3e-10
g417	Calca_contig_20	Tetratricopeptide repeat	TPR_2	PF07719	892	925	45.7	3.3e-10
g417	Calca_contig_20	Tetratricopeptide repeat	TPR_2	PF07719	934	967	45.7	3.3e-10
g417	Calca_contig_20	Tetratricopeptide repeat	TPR_2	PF07719	976	1009	45.7	3.3e-10
g417	Calca_contig_20	Tetratricopeptide repeat	TPR_2	PF07719	1018	1051	45.7	3.3e-10
g417	Calca_contig_20	Tetratricopeptide repeat	TPR_4	PF07721	808	833	35.5	4e-07
g417	Calca_contig_20	Tetratricopeptide repeat	TPR_4	PF07721	850	875	35.5	4e-07
g417	Calca_contig_20	Tetratricopeptide repeat	TPR_4	PF07721	892	917	35.5	4e-07
g417	Calca_contig_20	Tetratricopeptide repeat	TPR_4	PF07721	934	959	35.5	4e-07
g417	Calca_contig_20	Tetratricopeptide repeat	TPR_4	PF07721	976	1001	35.5	4e-07
g417	Calca_contig_20	Tetratricopeptide repeat	TPR_4	PF07721	1018	1043	35.5	4e-07
g419	Calca_contig_20	Aminotransferase class IV	Aminotran_4	PF01063	84	390	350.2	7.2e-102
g419	Calca_contig_20	Aminotransferase class IV	Aminotran_4	PF01063	84	390	352.2	1.8e-102
g420	Calca_contig_21	F-box domain	F-box	PF00646	126	173	36.5	4e-09
g420	Calca_contig_21	WD domain, G-beta repeat	WD40	PF00400	783	819	19.1	0.00047
g420	Calca_contig_21	F-box domain	F-box	PF00646	126	173	38.5	4.7e-08
g420	Calca_contig_21	Ubiquitin interaction motif	UIM	PF02809	953	970	25.6	0.00037
g420	Calca_contig_21	Ubiquitin interaction motif	UIM	PF02809	1023	1040	25.6	0.00037
g420	Calca_contig_21	Ubiquitin interaction motif	UIM	PF02809	1097	1114	25.6	0.00037
g421	Calca_contig_21	Heterokaryon incompatibility protein (HET)	HET	PF06985	71	226	67	1.3e-22
g421	Calca_contig_21	Heterokaryon incompatibility protein (HET)	HET	PF06985	71	226	68.8	3.7e-17
g429	Calca_contig_22	Acetyltransferase (GNAT) family	Acetyltransf_1	PF00583	455	554	31.3	1.6e-09
g429	Calca_contig_22	Radical SAM superfamily	Radical_SAM	PF04055	109	321	44.8	1e-11
g429	Calca_contig_22	Acetyltransferase (GNAT) family	Acetyltransf_1	PF00583	455	554	33.3	1.8e-06
g429	Calca_contig_22	Radical SAM superfamily	Radical_SAM	PF04055	109	321	46.8	1.5e-10
g430	Calca_contig_22	CoA binding domain	CoA_binding	PF02629	37	133	160.5	5.1e-45
g430	Calca_contig_22	CoA-ligase	Ligase_CoA	PF00549	167	312	234.3	5.4e-67
g430	Calca_contig_22	CoA binding domain	CoA_binding	PF02629	37	133	162.4	2.4e-45
g430	Calca_contig_22	CoA-ligase	Ligase_CoA	PF00549	167	312	236.3	1.4e-67
g432	Calca_contig_22	Fungal ubiquitin-associated domain	UBA_3	PF09288	176	206	28.6	4.9e-07
g432	Calca_contig_22	Ubiquitin-conjugating enzyme	UQ_con	PF00179	8	148	185.4	2.8e-52
g432	Calca_contig_22	Fungal ubiquitin-associated domain	UBA_3	PF09288	176	226	15.6	0.00039
g432	Calca_contig_22	Ubiquitin-conjugating enzyme	UQ_con	PF00179	8	148	187.3	7.7e-53
g433	Calca_contig_22	ATPase family associated with various cellular activities (AAA)	AAA	PF00004	238	425	282.1	4e-85
g433	Calca_contig_22	ATPase family associated with various cellular activities (AAA)	AAA_3	PF07726	239	267	22.6	3.4e-06
g433	Calca_contig_22	ATPase family associated with various cellular activities (AAA)	AAA_5	PF07728	238	257	18.9	7e-05
g433	Calca_contig_22	ATPase family associated with various cellular activities (AAA)	AAA	PF00004	238	425	283.9	6.2e-82
g433	Calca_contig_22	ATPase family associated with various cellular activities (AAA)	AAA_2	PF07724	235	366	-18.6	0.00057
g439	Calca_contig_22	Family of unknown function (DUF500)	DUF500	PF04366	333	453	87.8	1.6e-23
g439	Calca_contig_22	Family of unknown function (DUF500)	DUF500	PF04366	330	460	87.9	6.5e-23
g441	Calca_contig_22	Amidohydrolase family	Amidohydro_1	PF01979	71	410	181.9	3.3e-51
g441	Calca_contig_22	Amidohydrolase family	Amidohydro_3	PF07969	71	82	28.8	3e-07
g441	Calca_contig_22	Amidohydrolase family	Amidohydro_3	PF07969	317	408	28.8	3e-07
g441	Calca_contig_22	Amidohydrolase family	Amidohydro_1	PF01979	71	410	183.6	9.9e-52
g441	Calca_contig_22	Amidohydrolase family	Amidohydro_3	PF07969	71	408	-46.8	0.00037
g444	Calca_contig_22	Glycolipid anchored surface protein (GAS1)	Glyco_hydro_72	PF03198	8	334	596.6	4.8e-176
g444	Calca_contig_22	X8 domain	X8	PF07983	381	469	75.5	3.4e-19
g444	Calca_contig_22	Glycolipid anchored surface protein (GAS1)	Glyco_hydro_72	PF03198	8	334	598.5	1.3e-176
g444	Calca_contig_22	X8 domain	X8	PF07983	381	469	77.5	8.8e-20
g447	Calca_contig_22	ABC transporter	ABC_tran	PF00005	108	300	313.3	9.1e-91
g447	Calca_contig_22	ABC transporter	ABC_tran	PF00005	422	589	313.3	9.1e-91
g447	Calca_contig_22	Miro-like protein	Miro	PF08477	110	180	20.2	6.1e-05
g447	Calca_contig_22	Miro-like protein	Miro	PF08477	424	440	20.2	6.1e-05
g447	Calca_contig_22	NACHT domain	NACHT	PF05729	109	129	29.5	3.9e-08
g447	Calca_contig_22	NACHT domain	NACHT	PF05729	423	440	29.5	3.9e-08
g447	Calca_contig_22	ABC transporter	ABC_tran	PF00005	108	300	316.8	7.8e-92
g447	Calca_contig_22	ABC transporter	ABC_tran	PF00005	422	589	316.8	7.8e-92
g449	Calca_contig_22	Acetyltransferase (GNAT) family	Acetyltransf_1	PF00583	62	192	43.5	1.4e-13
g449	Calca_contig_22	Acetyltransferase (GNAT) family	Acetyltransf_1	PF00583	62	192	45.5	3.8e-10
g450	Calca_contig_23	S4 domain	S4	PF01479	503	550	64.4	1.9e-16
g450	Calca_contig_23	S4 domain	S4	PF01479	503	550	66.4	2e-16
g451	Calca_contig_23	ATPase family associated with various cellular activities (AAA)	AAA	PF00004	300	336	35.6	2.8e-10
g451	Calca_contig_23	ATPase family associated with various cellular activities (AAA)	AAA	PF00004	300	518	16.9	1.2e-06
g452	Calca_contig_23	Cytochrome b5-like Heme/Steroid binding domain	Cyt-b5	PF00173	144	219	76.6	5.7e-20
g452	Calca_contig_23	FMN-dependent dehydrogenase	FMN_dh	PF01070	260	602	597.3	2.9e-176
g452	Calca_contig_23	Conserved region in glutamate synthase	Glu_synthase	PF01645	510	561	19.7	3.3e-05
g452	Calca_contig_23	Cytochrome b5-like Heme/Steroid binding domain	Cyt-b5	PF00173	144	219	78.5	4.4e-20
g452	Calca_contig_23	FMN-dependent dehydrogenase	FMN_dh	PF01070	260	602	599.2	7.8e-177
g453	Calca_contig_23	BRO1-like domain	BRO1	PF03097	5	397	592.2	3.7e-179
g453	Calca_contig_23	BRO1-like domain	BRO1	PF03097	5	397	594.1	2.8e-175
g455	Calca_contig_23	Phospholipase D Active site motif	PLDc	PF00614	208	235	60.2	6.1e-16
g455	Calca_contig_23	Phospholipase D Active site motif	PLDc	PF00614	639	666	60.2	6.1e-16
g455	Calca_contig_23	Phospholipase D Active site motif	PLDc	PF00614	208	235	64.2	9e-16
g455	Calca_contig_23	Phospholipase D Active site motif	PLDc	PF00614	639	666	64.2	9e-16
g457	Calca_contig_23	Glycolipid transfer protein (GLTP)	GLTP	PF08718	17	209	300.5	3.4e-89
g457	Calca_contig_23	Glycolipid transfer protein (GLTP)	GLTP	PF08718	17	209	302.4	1.8e-87
g458	Calca_contig_23	alpha/beta hydrolase fold	Abhydrolase_3	PF07859	96	177	158.6	3.4e-44
g458	Calca_contig_23	alpha/beta hydrolase fold	Abhydrolase_3	PF07859	202	319	158.6	3.4e-44
g458	Calca_contig_23	Carboxylesterase	COesterase	PF00135	82	136	18.9	3e-05
g458	Calca_contig_23	alpha/beta hydrolase fold	Abhydrolase_3	PF07859	96	319	153.8	9.4e-43
g460	Calca_contig_23	tRNA synthetases class II (D, K and N)	tRNA-synt_2	PF00152	254	572	296.1	1.3e-85
g460	Calca_contig_23	OB-fold nucleic acid binding domain	tRNA_anti	PF01336	155	238	30.3	4.7e-07
g460	Calca_contig_23	Family of unknown function (DUF470)	DUF470	PF04329	597	733	-18	0.00058
g460	Calca_contig_23	tRNA synthetases class II (D, K and N)	tRNA-synt_2	PF00152	254	572	297.9	3.8e-86
g460	Calca_contig_23	OB-fold nucleic acid binding domain	tRNA_anti	PF01336	155	238	32.1	4.1e-06
g463	Calca_contig_23	Ankyrin repeat	Ank	PF00023	278	297	119.2	2.4e-32
g463	Calca_contig_23	Ankyrin repeat	Ank	PF00023	304	336	119.2	2.4e-32
g463	Calca_contig_23	Ankyrin repeat	Ank	PF00023	338	374	119.2	2.4e-32
g463	Calca_contig_23	Ankyrin repeat	Ank	PF00023	380	403	119.2	2.4e-32
g463	Calca_contig_23	Ankyrin repeat	Ank	PF00023	483	510	119.2	2.4e-32
g463	Calca_contig_23	Ankyrin repeat	Ank	PF00023	511	538	119.2	2.4e-32
g463	Calca_contig_23	Ankyrin repeat	Ank	PF00023	547	588	119.2	2.4e-32
g463	Calca_contig_23	Ankyrin repeat	Ank	PF00023	645	668	119.2	2.4e-32
g463	Calca_contig_23	Ankyrin repeat	Ank	PF00023	669	697	119.2	2.4e-32
g463	Calca_contig_23	Ankyrin repeat	Ank	PF00023	708	732	119.2	2.4e-32
g463	Calca_contig_23	Ankyrin repeat	Ank	PF00023	796	825	119.2	2.4e-32
g463	Calca_contig_23	Ankyrin repeat	Ank	PF00023	878	901	119.2	2.4e-32
g463	Calca_contig_23	Ankyrin repeat	Ank	PF00023	905	937	119.2	2.4e-32
g463	Calca_contig_23	Ankyrin repeat	Ank	PF00023	940	962	119.2	2.4e-32
g463	Calca_contig_23	Ankyrin repeat	Ank	PF00023	245	297	121.1	6.5e-33
g463	Calca_contig_23	Ankyrin repeat	Ank	PF00023	304	336	121.1	6.5e-33
g463	Calca_contig_23	Ankyrin repeat	Ank	PF00023	338	374	121.1	6.5e-33
g463	Calca_contig_23	Ankyrin repeat	Ank	PF00023	376	408	121.1	6.5e-33
g463	Calca_contig_23	Ankyrin repeat	Ank	PF00023	476	510	121.1	6.5e-33
g463	Calca_contig_23	Ankyrin repeat	Ank	PF00023	511	543	121.1	6.5e-33
g463	Calca_contig_23	Ankyrin repeat	Ank	PF00023	544	588	121.1	6.5e-33
g463	Calca_contig_23	Ankyrin repeat	Ank	PF00023	638	668	121.1	6.5e-33
g463	Calca_contig_23	Ankyrin repeat	Ank	PF00023	669	701	121.1	6.5e-33
g463	Calca_contig_23	Ankyrin repeat	Ank	PF00023	793	825	121.1	6.5e-33
g463	Calca_contig_23	Ankyrin repeat	Ank	PF00023	869	901	121.1	6.5e-33
g463	Calca_contig_23	Ankyrin repeat	Ank	PF00023	905	937	121.1	6.5e-33
g463	Calca_contig_23	Ankyrin repeat	Ank	PF00023	940	971	121.1	6.5e-33
g464	Calca_contig_24	Histone-like transcription factor (CBF/NF-Y) and archaeal histone	CBFD_NFYB_HMF	PF00808	26	90	18.1	0.00038
g464	Calca_contig_24	Core histone H2A/H2B/H3/H4	Histone	PF00125	20	93	113.2	8.3e-31
g464	Calca_contig_24	Core histone H2A/H2B/H3/H4	Histone	PF00125	20	93	115.2	3.9e-31
g465	Calca_contig_24	Core histone H2A/H2B/H3/H4	Histone	PF00125	42	112	100.1	4e-27
g465	Calca_contig_24	Core histone H2A/H2B/H3/H4	Histone	PF00125	42	112	102.1	3.5e-27
g466	Calca_contig_24	G-patch domain	G-patch	PF01585	602	644	26.5	1.7e-06
g466	Calca_contig_24	R3H domain	R3H	PF01424	486	540	45.2	3.5e-12
g466	Calca_contig_24	R3H domain	R3H	PF01424	486	540	47.1	1.2e-10
g467	Calca_contig_24	Peptidase family C54	Peptidase_C54	PF03416	110	388	439.2	1.1e-128
g467	Calca_contig_24	Peptidase family C54	Peptidase_C54	PF03416	110	403	425.7	1.4e-124
g468	Calca_contig_24	DnaJ domain	DnaJ	PF00226	20	83	120.7	6.7e-35
g468	Calca_contig_24	DnaJ domain	DnaJ	PF00226	20	83	122.6	2.4e-33
g469	Calca_contig_24	SPX domain	SPX	PF03105	1	40	17.8	9.5e-05
g469	Calca_contig_24	SPX domain	SPX	PF03105	296	331	17.8	9.5e-05
g469	Calca_contig_24	SPX domain	SPX	PF03105	1	343	-25.9	0.00056
g470	Calca_contig_24	Cys/Met metabolism PLP-dependent enzyme	Cys_Met_Meta_PP	PF01053	180	526	-179	3.2e-09
g471	Calca_contig_24	Nep1 ribosome biogenesis protein	Nep1	PF03587	90	256	324.4	4.7e-100
g471	Calca_contig_24	Nep1 ribosome biogenesis protein	Nep1	PF03587	90	256	326.3	1.1e-94
g472	Calca_contig_24	Ribosomal protein S17	Ribosomal_S17	PF00366	18	87	21.3	5.6e-05
g472	Calca_contig_24	Ribosomal protein S17	Ribosomal_S17	PF00366	18	87	23.3	5.7e-05
g473	Calca_contig_24	ATPase family associated with various cellular activities (AAA)	AAA	PF00004	567	767	250.3	1.9e-75
g473	Calca_contig_24	ATPase family associated with various cellular activities (AAA)	AAA_5	PF07728	567	586	20.5	2.4e-05
g473	Calca_contig_24	Magnesium chelatase, subunit ChlI	Mg_chelatase	PF01078	568	584	18.3	0.00018
g473	Calca_contig_24	Vps4 C terminal oligomerisation domain	Vps4_C	PF09336	783	816	25.1	3e-07
g473	Calca_contig_24	ATPase family associated with various cellular activities (AAA)	AAA	PF00004	567	767	252.1	2.4e-72
g473	Calca_contig_24	Vps4 C terminal oligomerisation domain	Vps4_C	PF09336	771	816	14.6	5.2e-05
g474	Calca_contig_24	Conserved oligomeric complex COG6	COG6	PF06419	53	578	290.1	1.6e-87
g474	Calca_contig_24	Conserved oligomeric complex COG6	COG6	PF06419	53	666	264.1	5.9e-76
g475	Calca_contig_24	Autophagy protein Apg9	APG9	PF04109	305	678	512.9	7.3e-151
g475	Calca_contig_24	Autophagy protein Apg9	APG9	PF04109	305	700	512.5	1e-150
g476	Calca_contig_24	Mitochondrial carrier protein	Mito_carr	PF00153	11	76	248.3	3.1e-72
g476	Calca_contig_24	Mitochondrial carrier protein	Mito_carr	PF00153	81	171	248.3	3.1e-72
g476	Calca_contig_24	Mitochondrial carrier protein	Mito_carr	PF00153	174	269	248.3	3.1e-72
g476	Calca_contig_24	Mitochondrial carrier protein	Mito_carr	PF00153	1	76	233.8	7.9e-67
g476	Calca_contig_24	Mitochondrial carrier protein	Mito_carr	PF00153	81	171	233.8	7.9e-67
g476	Calca_contig_24	Mitochondrial carrier protein	Mito_carr	PF00153	174	269	233.8	7.9e-67
g477	Calca_contig_24	DnaJ domain	DnaJ	PF00226	403	469	108.5	2.8e-31
g477	Calca_contig_24	Tetratricopeptide repeat	TPR_1	PF00515	32	65	64.6	5.1e-17
g477	Calca_contig_24	Tetratricopeptide repeat	TPR_1	PF00515	66	99	64.6	5.1e-17
g477	Calca_contig_24	Tetratricopeptide repeat	TPR_1	PF00515	331	347	64.6	5.1e-17
g477	Calca_contig_24	Tetratricopeptide repeat	TPR_1	PF00515	348	381	64.6	5.1e-17
g477	Calca_contig_24	Tetratricopeptide repeat	TPR_2	PF07719	32	65	63.4	2.2e-16
g477	Calca_contig_24	Tetratricopeptide repeat	TPR_2	PF07719	66	99	63.4	2.2e-16
g477	Calca_contig_24	Tetratricopeptide repeat	TPR_2	PF07719	100	126	63.4	2.2e-16
g477	Calca_contig_24	Tetratricopeptide repeat	TPR_2	PF07719	141	174	63.4	2.2e-16
g477	Calca_contig_24	Tetratricopeptide repeat	TPR_2	PF07719	175	208	63.4	2.2e-16
g477	Calca_contig_24	Tetratricopeptide repeat	TPR_2	PF07719	329	347	63.4	2.2e-16
g477	Calca_contig_24	Tetratricopeptide repeat	TPR_2	PF07719	348	381	63.4	2.2e-16
g477	Calca_contig_24	DnaJ domain	DnaJ	PF00226	403	469	110.4	1.1e-29
g477	Calca_contig_24	Tetratricopeptide repeat	TPR_1	PF00515	32	65	70.2	1.3e-17
g477	Calca_contig_24	Tetratricopeptide repeat	TPR_1	PF00515	66	99	70.2	1.3e-17
g477	Calca_contig_24	Tetratricopeptide repeat	TPR_1	PF00515	314	347	70.2	1.3e-17
g477	Calca_contig_24	Tetratricopeptide repeat	TPR_1	PF00515	348	381	70.2	1.3e-17
g477	Calca_contig_24	Tetratricopeptide repeat	TPR_2	PF07719	32	65	70.6	1.1e-17
g477	Calca_contig_24	Tetratricopeptide repeat	TPR_2	PF07719	66	99	70.6	1.1e-17
g477	Calca_contig_24	Tetratricopeptide repeat	TPR_2	PF07719	141	174	70.6	1.1e-17
g477	Calca_contig_24	Tetratricopeptide repeat	TPR_2	PF07719	175	208	70.6	1.1e-17
g477	Calca_contig_24	Tetratricopeptide repeat	TPR_2	PF07719	314	347	70.6	1.1e-17
g477	Calca_contig_24	Tetratricopeptide repeat	TPR_2	PF07719	348	381	70.6	1.1e-17
g479	Calca_contig_24	HEAT repeat	HEAT	PF02985	86	122	53.5	1.1e-13
g479	Calca_contig_24	HEAT repeat	HEAT	PF02985	229	265	53.5	1.1e-13
g479	Calca_contig_24	HEAT repeat	HEAT	PF02985	332	369	53.5	1.1e-13
g479	Calca_contig_24	HEAT repeat	HEAT	PF02985	519	555	53.5	1.1e-13
g479	Calca_contig_24	HEAT repeat	HEAT	PF02985	86	122	61.5	5.8e-15
g479	Calca_contig_24	HEAT repeat	HEAT	PF02985	229	265	61.5	5.8e-15
g479	Calca_contig_24	HEAT repeat	HEAT	PF02985	332	369	61.5	5.8e-15
g479	Calca_contig_24	HEAT repeat	HEAT	PF02985	519	555	61.5	5.8e-15
g480	Calca_contig_24	Cytochrome b5-like Heme/Steroid binding domain	Cyt-b5	PF00173	23	96	45.2	2.5e-11
g480	Calca_contig_24	Fatty acid desaturase	FA_desaturase	PF00487	269	531	129.8	9.2e-37
g480	Calca_contig_24	Cytochrome b5-like Heme/Steroid binding domain	Cyt-b5	PF00173	23	96	47.1	1.3e-10
g480	Calca_contig_24	Fatty acid desaturase	FA_desaturase	PF00487	269	531	131.6	4.5e-36
g481	Calca_contig_24	FAD dependent oxidoreductase	DAO	PF01266	70	105	19.2	6.4e-05
g481	Calca_contig_24	FAD dependent oxidoreductase	DAO	PF01266	241	269	19.2	6.4e-05
g481	Calca_contig_24	FAD dependent oxidoreductase	DAO	PF01266	289	337	19.2	6.4e-05
g481	Calca_contig_24	FAD binding domain	FAD_binding_2	PF00890	70	106	31	1.3e-08
g481	Calca_contig_24	HI0933-like protein	HI0933_like	PF03486	69	104	15.1	0.00079
g481	Calca_contig_24	Pyridine nucleotide-disulphide oxidoreductase	Pyr_redox	PF00070	70	103	117	1.6e-33
g481	Calca_contig_24	Pyridine nucleotide-disulphide oxidoreductase	Pyr_redox	PF00070	162	210	117	1.6e-33
g481	Calca_contig_24	Pyridine nucleotide-disulphide oxidoreductase	Pyr_redox	PF00070	241	339	117	1.6e-33
g481	Calca_contig_24	Pyridine nucleotide-disulphide oxidoreductase	Pyr_redox_2	PF07992	70	386	236.9	9e-68
g481	Calca_contig_24	Pyridine nucleotide-disulphide oxidoreductase, dimerisation domain	Pyr_redox_dim	PF02852	414	523	212.2	2.4e-60
g481	Calca_contig_24	Pyridine nucleotide-disulphide oxidoreductase	Pyr_redox	PF00070	241	339	124.6	5.7e-34
g481	Calca_contig_24	Pyridine nucleotide-disulphide oxidoreductase	Pyr_redox_2	PF07992	70	386	238.7	2.6e-68
g481	Calca_contig_24	Pyridine nucleotide-disulphide oxidoreductase, dimerisation domain	Pyr_redox_dim	PF02852	414	523	214.2	6.2e-61
g483	Calca_contig_24	MIF4G domain	MIF4G	PF02854	333	534	86.2	1.9e-24
g483	Calca_contig_24	MIF4G domain	MIF4G	PF02854	333	534	88	6.1e-23
g485	Calca_contig_24	RNA recognition motif. (a.k.a. RRM, RBD, or RNP domain)	RRM_1	PF00076	48	118	202.5	2e-57
g485	Calca_contig_24	RNA recognition motif. (a.k.a. RRM, RBD, or RNP domain)	RRM_1	PF00076	162	235	202.5	2e-57
g485	Calca_contig_24	RNA recognition motif. (a.k.a. RRM, RBD, or RNP domain)	RRM_1	PF00076	333	403	202.5	2e-57
g485	Calca_contig_24	RNA recognition motif. (a.k.a. RRM, RBD, or RNP domain)	RRM_1	PF00076	48	118	208.4	3.4e-59
g485	Calca_contig_24	RNA recognition motif. (a.k.a. RRM, RBD, or RNP domain)	RRM_1	PF00076	162	235	208.4	3.4e-59
g485	Calca_contig_24	RNA recognition motif. (a.k.a. RRM, RBD, or RNP domain)	RRM_1	PF00076	333	403	208.4	3.4e-59
g487	Calca_contig_24	COQ9	COQ9	PF08511	162	240	124.9	1.2e-34
g487	Calca_contig_24	COQ9	COQ9	PF08511	162	240	126.9	1.2e-34
g488	Calca_contig_24	RecF/RecN/SMC N terminal domain	SMC_N	PF02463	122	172	48.3	2.8e-13
g488	Calca_contig_24	RecF/RecN/SMC N terminal domain	SMC_N	PF02463	226	1115	48.3	2.8e-13
g488	Calca_contig_24	RecF/RecN/SMC N terminal domain	SMC_N	PF02463	122	1164	23.4	4e-13
g489	Calca_contig_24	SGT1 protein	SGT1	PF07093	25	334	281.9	2.3e-84
g489	Calca_contig_24	SGT1 protein	SGT1	PF07093	574	612	281.9	2.3e-84
g489	Calca_contig_24	SGT1 protein	SGT1	PF07093	25	612	195.2	3.3e-55
g490	Calca_contig_24	THUMP domain	THUMP	PF02926	211	267	28.3	2.1e-07
g491	Calca_contig_24	Thiamine pyrophosphate enzyme, C-terminal TPP binding domain	TPP_enzyme_C	PF02775	394	476	44	3.5e-13
g491	Calca_contig_24	Thiamine pyrophosphate enzyme, central domain	TPP_enzyme_M	PF00205	209	307	76.9	1.1e-20
g491	Calca_contig_24	Thiamine pyrophosphate enzyme, N-terminal TPP binding domain	TPP_enzyme_N	PF02776	13	188	218.4	2.8e-62
g491	Calca_contig_24	Thiamine pyrophosphate enzyme, C-terminal TPP binding domain	TPP_enzyme_C	PF02775	394	555	15.5	3.4e-07
g491	Calca_contig_24	Thiamine pyrophosphate enzyme, central domain	TPP_enzyme_M	PF00205	209	341	73.9	1.1e-18
g491	Calca_contig_24	Thiamine pyrophosphate enzyme, N-terminal TPP binding domain	TPP_enzyme_N	PF02776	13	188	220.4	8.5e-63
g492	Calca_contig_24	Erv1 / Alr family	Evr1_Alr	PF04777	94	184	164.9	4.3e-46
g492	Calca_contig_24	Erv1 / Alr family	Evr1_Alr	PF04777	94	184	166.8	1.1e-46
g493	Calca_contig_24	Uroporphyrinogen-III synthase HemD	HEM4	PF02602	46	281	-18.6	0.00094
g494	Calca_contig_24	TLD	TLD	PF07534	100	279	128.3	4.4e-35
g494	Calca_contig_24	TLD	TLD	PF07534	100	279	130.2	1.2e-35
g495	Calca_contig_24	Protein kinase domain	Pkinase	PF00069	24	104	314.5	4e-91
g495	Calca_contig_24	Protein kinase domain	Pkinase	PF00069	106	290	314.5	4e-91
g495	Calca_contig_24	Protein tyrosine kinase	Pkinase_Tyr	PF07714	24	86	52.3	1.1e-14
g495	Calca_contig_24	Protein tyrosine kinase	Pkinase_Tyr	PF07714	118	243	52.3	1.1e-14
g495	Calca_contig_24	Protein kinase domain	Pkinase	PF00069	24	290	309.5	1.3e-89
g495	Calca_contig_24	Protein tyrosine kinase	Pkinase_Tyr	PF07714	24	290	-6.7	1.1e-11
g496	Calca_contig_24	Gelsolin repeat	Gelsolin	PF00626	814	889	45.8	6.5e-12
g496	Calca_contig_24	Sec23/Sec24 beta-sandwich domain	Sec23_BS	PF08033	593	676	143.1	4.1e-40
g496	Calca_contig_24	Sec23/Sec24 helical domain	Sec23_helical	PF04815	688	791	97.1	1e-27
g496	Calca_contig_24	Sec23/Sec24 trunk domain	Sec23_trunk	PF04811	346	588	325.9	1.4e-94
g496	Calca_contig_24	Sec23/Sec24 zinc finger	zf-Sec23_Sec24	PF04810	271	310	73.7	3.3e-19
g496	Calca_contig_24	Gelsolin repeat	Gelsolin	PF00626	814	889	47.7	8.4e-11
g496	Calca_contig_24	Sec23/Sec24 beta-sandwich domain	Sec23_BS	PF08033	593	676	144.9	4.5e-40
g496	Calca_contig_24	Sec23/Sec24 helical domain	Sec23_helical	PF04815	688	791	99.1	2.7e-26
g496	Calca_contig_24	Sec23/Sec24 trunk domain	Sec23_trunk	PF04811	346	588	327.8	3.9e-95
g496	Calca_contig_24	Sec23/Sec24 zinc finger	zf-Sec23_Sec24	PF04810	271	310	75.7	3.1e-19
g499	Calca_contig_24	Importin-beta N-terminal domain	IBN_N	PF03810	48	115	22.3	3.7e-05
g499	Calca_contig_24	Importin-beta N-terminal domain	IBN_N	PF03810	48	115	24.1	0.00059
g501	Calca_contig_24	Domain of unknown function (DUF1917)	DUF1917	PF08939	74	270	260.1	9.7e-75
g501	Calca_contig_24	Domain of unknown function (DUF1917)	DUF1917	PF08939	74	278	244.5	4.6e-70
g502	Calca_contig_24	Acetyltransferase (GNAT) family	Acetyltransf_1	PF00583	61	147	80.8	6.3e-26
g502	Calca_contig_24	FR47-like protein	FR47	PF08445	90	157	19.1	0.00012
g502	Calca_contig_24	Acetyltransferase (GNAT) family	Acetyltransf_1	PF00583	61	147	82.8	2.3e-21
g503	Calca_contig_24	Lecithin:cholesterol acyltransferase	LACT	PF02450	142	583	464.4	3e-136
g503	Calca_contig_24	Lecithin:cholesterol acyltransferase	LACT	PF02450	142	583	466.2	8.3e-137
g505	Calca_contig_24	Protein of unknown function (DUF2013)	DUF2013	PF09431	187	336	285.8	7.3e-85
g505	Calca_contig_24	Protein of unknown function (DUF2013)	DUF2013	PF09431	187	336	287.7	4.7e-83
g506	Calca_contig_24	PH domain	PH	PF00169	581	683	34.6	6.4e-09
g506	Calca_contig_24	PH domain	PH	PF00169	581	683	36.6	1.8e-07
g508	Calca_contig_24	CDP-alcohol phosphatidyltransferase	CDP-OH_P_transf	PF01066	86	186	86.1	4.8e-26
g508	Calca_contig_24	CDP-alcohol phosphatidyltransferase	CDP-OH_P_transf	PF01066	86	216	82.4	2.9e-21
g509	Calca_contig_24	Gar1 protein RNA binding region	Gar1	PF04410	30	131	218.5	2.8e-66
g509	Calca_contig_24	Gar1 protein RNA binding region	Gar1	PF04410	30	131	220.4	8.1e-63
g511	Calca_contig_24	Whi5 like	Whi5	PF08528	28	52	40.7	2.6e-11
g511	Calca_contig_24	Whi5 like	Whi5	PF08528	28	52	42.7	2.7e-09
g515	Calca_contig_24	Exonuclease	Exonuc_X-T	PF00929	79	139	28.9	4.3e-08
g515	Calca_contig_24	Exonuclease	Exonuc_X-T	PF00929	254	274	28.9	4.3e-08
g515	Calca_contig_24	Exonuclease	Exonuc_X-T	PF00929	79	274	15.2	2.8e-05
g516	Calca_contig_24	Acetyltransferase (GNAT) family	Acetyltransf_1	PF00583	116	195	33.3	3.5e-10
g516	Calca_contig_24	Acetyltransferase (GNAT) family	Acetyltransf_1	PF00583	109	195	33.1	2e-06
g517	Calca_contig_24	Caspase domain	Peptidase_C14	PF00656	154	444	254.4	5.7e-79
g517	Calca_contig_24	Caspase domain	Peptidase_C14	PF00656	154	444	256.3	1.3e-73
g518	Calca_contig_24	Microtubule associated	Microtub_assoc	PF07989	193	255	106	2.3e-28
g518	Calca_contig_24	Microtubule associated	Microtub_assoc	PF07989	280	296	106	2.3e-28
g518	Calca_contig_24	Microtubule associated	Microtub_assoc	PF07989	382	396	106	2.3e-28
g518	Calca_contig_24	Microtubule associated	Microtub_assoc	PF07989	415	438	106	2.3e-28
g518	Calca_contig_24	Microtubule associated	Microtub_assoc	PF07989	524	547	106	2.3e-28
g518	Calca_contig_24	Microtubule associated	Microtub_assoc	PF07989	914	925	106	2.3e-28
g518	Calca_contig_24	Microtubule associated	Microtub_assoc	PF07989	962	981	106	2.3e-28
g518	Calca_contig_24	Microtubule associated	Microtub_assoc	PF07989	1155	1165	106	2.3e-28
g518	Calca_contig_24	Microtubule associated	Microtub_assoc	PF07989	193	255	127.4	8.5e-35
g519	Calca_contig_24	F-box domain	F-box	PF00646	1	49	27.8	1.2e-06
g519	Calca_contig_24	Hemimethylated DNA-binding protein YccV like	YccV-like	PF08755	529	552	25.7	4.9e-06
g519	Calca_contig_24	F-box domain	F-box	PF00646	1	49	29.8	2e-05
g520	Calca_contig_24	Ubiquitin carboxyl-terminal hydrolase, family 1	Peptidase_C12	PF01088	44	273	240.4	8.1e-69
g520	Calca_contig_24	Ubiquitin carboxyl-terminal hydrolase, family 1	Peptidase_C12	PF01088	44	273	242.1	2.5e-69
g523	Calca_contig_24	Nrap protein	Nrap	PF03813	126	609	551.1	2.4e-162
g523	Calca_contig_24	Nrap protein	Nrap	PF03813	642	1103	551.1	2.4e-162
g523	Calca_contig_24	Nrap protein	Nrap	PF03813	126	1103	551.3	2.1e-162
g524	Calca_contig_24	Coenzyme A transferase	CoA_trans	PF01144	42	272	436.3	8.6e-128
g524	Calca_contig_24	Coenzyme A transferase	CoA_trans	PF01144	305	504	436.3	8.6e-128
g524	Calca_contig_24	Coenzyme A transferase	CoA_trans	PF01144	42	272	440	6.5e-129
g524	Calca_contig_24	Coenzyme A transferase	CoA_trans	PF01144	305	504	440	6.5e-129
g528	Calca_contig_24	Surfeit locus protein 6	SURF6	PF04935	54	96	30.7	8.4e-09
g528	Calca_contig_24	Surfeit locus protein 6	SURF6	PF04935	138	204	30.7	8.4e-09
g528	Calca_contig_24	Surfeit locus protein 6	SURF6	PF04935	430	528	30.7	8.4e-09
g528	Calca_contig_24	Surfeit locus protein 6	SURF6	PF04935	532	545	30.7	8.4e-09
g528	Calca_contig_24	Surfeit locus protein 6	SURF6	PF04935	346	543	63.8	1.2e-15
g529	Calca_contig_24	Golgi phosphoprotein 3 (GPP34)	GPP34	PF05719	77	357	457.8	3.8e-145
g529	Calca_contig_24	Golgi phosphoprotein 3 (GPP34)	GPP34	PF05719	77	357	459.8	7.1e-135
g532	Calca_contig_24	Adaptin C-terminal domain	Alpha_adaptinC2	PF02883	1789	1878	53.4	2.2e-15
g532	Calca_contig_24	Elongation factor Tu GTP binding domain	GTP_EFTU	PF00009	392	558	203.5	1e-57
g532	Calca_contig_24	Elongation factor Tu domain 2	GTP_EFTU_D2	PF03144	582	645	40.2	7e-10
g532	Calca_contig_24	Elongation factor Tu domain 2	GTP_EFTU_D2	PF03144	839	900	40.2	7e-10
g532	Calca_contig_24	GTPase of unknown function	MMR_HSR1	PF01926	395	505	25.8	5.7e-06
g532	Calca_contig_24	VHS domain	VHS	PF00790	1265	1409	225.4	2.6e-64
g532	Calca_contig_24	Adaptin C-terminal domain	Alpha_adaptinC2	PF02883	1753	1878	47.6	8.5e-11
g532	Calca_contig_24	Elongation factor Tu GTP binding domain	GTP_EFTU	PF00009	392	558	205.1	3.5e-58
g532	Calca_contig_24	Elongation factor Tu domain 2	GTP_EFTU_D2	PF03144	582	645	43.3	1.7e-09
g532	Calca_contig_24	Elongation factor Tu domain 2	GTP_EFTU_D2	PF03144	837	905	43.3	1.7e-09
g532	Calca_contig_24	GTPase of unknown function	MMR_HSR1	PF01926	395	505	27.6	6.4e-06
g532	Calca_contig_24	VHS domain	VHS	PF00790	1265	1409	227.4	6.8e-65
g533	Calca_contig_24	Domain of unknown function (DUF367)	DUF367	PF04034	78	205	233.6	1.6e-69
g533	Calca_contig_24	Possible metal-binding domain in RNase L inhibitor, RLI	RLI	PF04068	40	74	38.4	2.1e-09
g533	Calca_contig_24	Domain of unknown function (DUF367)	DUF367	PF04034	78	205	235.6	2.2e-67
g533	Calca_contig_24	Possible metal-binding domain in RNase L inhibitor, RLI	RLI	PF04068	40	74	40.4	1.3e-08
g535	Calca_contig_24	Histone promoter control 2 (HPC2)	HPC2	PF08729	152	615	320.7	5.3e-93
g535	Calca_contig_24	Histone promoter control 2 (HPC2)	HPC2	PF08729	152	615	322.4	1.7e-93
g536	Calca_contig_24	RPAP1-like, C-terminal	RPAP1_C	PF08620	274	347	148.1	4.5e-42
g536	Calca_contig_24	RPAP1-like, N-terminal	RPAP1_N	PF08621	83	131	68.4	8.5e-19
g536	Calca_contig_24	RPAP1-like, C-terminal	RPAP1_C	PF08620	274	347	150	1.3e-41
g536	Calca_contig_24	RPAP1-like, N-terminal	RPAP1_N	PF08621	83	131	70.4	1.2e-17
g538	Calca_contig_24	Eukaryotic translation initiation factor eIF2A	eIF2A	PF08662	217	411	434.6	2.9e-127
g538	Calca_contig_24	Eukaryotic translation initiation factor eIF2A	eIF2A	PF08662	217	411	436.5	7.4e-128
g541	Calca_contig_24	Major Facilitator Superfamily	MFS_1	PF07690	167	551	125.9	2.3e-34
g541	Calca_contig_24	Major Facilitator Superfamily	MFS_1	PF07690	167	551	127.8	6.2e-35
g543	Calca_contig_24	alpha/beta hydrolase fold	Abhydrolase_3	PF07859	87	299	216.5	1.2e-61
g543	Calca_contig_24	alpha/beta hydrolase fold	Abhydrolase_3	PF07859	87	299	218.4	3.4e-62
g544	Calca_contig_24	CP2 transcription factor	CP2	PF04516	242	303	31.6	3.2e-08
g544	Calca_contig_24	CP2 transcription factor	CP2	PF04516	361	400	31.6	3.2e-08
g544	Calca_contig_24	CP2 transcription factor	CP2	PF04516	425	439	31.6	3.2e-08
g544	Calca_contig_24	CP2 transcription factor	CP2	PF04516	206	456	7	3.4e-10
g545	Calca_contig_25	NAD-dependent glycerol-3-phosphate dehydrogenase C-terminus	NAD_Gly3P_dh_C	PF07479	266	417	205.4	2.7e-58
g545	Calca_contig_25	NAD-dependent glycerol-3-phosphate dehydrogenase N-terminus	NAD_Gly3P_dh_N	PF01210	14	203	212	3.9e-62
g545	Calca_contig_25	NAD-dependent glycerol-3-phosphate dehydrogenase C-terminus	NAD_Gly3P_dh_C	PF07479	266	417	207.3	7.1e-59
g545	Calca_contig_25	NAD-dependent glycerol-3-phosphate dehydrogenase N-terminus	NAD_Gly3P_dh_N	PF01210	14	203	214	7.2e-61
g547	Calca_contig_25	3-beta hydroxysteroid dehydrogenase/isomerase family	3Beta_HSD	PF01073	20	79	16.2	0.00013
g547	Calca_contig_25	NAD dependent epimerase/dehydratase family	Epimerase	PF01370	19	89	30.8	3.5e-07
g547	Calca_contig_25	NmrA-like family	NmrA	PF05368	19	50	32.2	1e-08
g547	Calca_contig_25	Saccharopine dehydrogenase	Saccharop_dh	PF03435	19	107	21.2	6.1e-05
g547	Calca_contig_25	Semialdehyde dehydrogenase, NAD binding domain	Semialdhyde_dh	PF01118	18	38	15.3	0.00097
g547	Calca_contig_25	NmrA-like family	NmrA	PF05368	19	256	-33.1	3.4e-06
g549	Calca_contig_25	Amylo-alpha-1,6-glucosidase	GDE_C	PF06202	1070	1542	685.4	8.8e-203
g549	Calca_contig_25	Amylo-alpha-1,6-glucosidase	GDE_C	PF06202	1070	1542	687.3	2.3e-203
g553	Calca_contig_25	Major Facilitator Superfamily	MFS_1	PF07690	62	270	111.5	4.4e-30
g553	Calca_contig_25	Major Facilitator Superfamily	MFS_1	PF07690	273	465	111.5	4.4e-30
g553	Calca_contig_25	Major Facilitator Superfamily	MFS_1	PF07690	62	465	115.1	4.1e-31
g554	Calca_contig_25	Domain of unknown function DUF221	DUF221	PF02714	373	756	211.9	3e-60
g554	Calca_contig_25	Domain of unknown function DUF221	DUF221	PF02714	373	789	217.6	5.8e-62
g555	Calca_contig_25	FAD dependent oxidoreductase	DAO	PF01266	4	44	17.8	0.00016
g555	Calca_contig_25	Pyridine nucleotide-disulphide oxidoreductase	Pyr_redox_2	PF07992	4	38	17.9	0.00038
g555	Calca_contig_25	Flavin-binding monooxygenase-like	FMO-like	PF00743	2	582	-426	0.00013
g555	Calca_contig_25	Pyridine nucleotide-disulphide oxidoreductase	Pyr_redox_2	PF07992	4	367	-17	0.00092
g558	Calca_contig_25	RmlD substrate binding domain	RmlD_sub_bind	PF04321	4	41	16.4	0.00024
g560	Calca_contig_25	Thioesterase superfamily	4HBT	PF03061	128	213	42.7	9.7e-11
g560	Calca_contig_25	Thioesterase superfamily	4HBT	PF03061	128	213	44.7	6.6e-10
g561	Calca_contig_25	C2 domain	C2	PF00168	70	163	58.8	1.5e-16
g561	Calca_contig_25	C2 domain	C2	PF00168	70	163	60.8	9.3e-15
g563	Calca_contig_25	PhoD-like phosphatase	PhoD	PF09423	65	87	274.4	4.7e-79
g563	Calca_contig_25	PhoD-like phosphatase	PhoD	PF09423	151	557	274.4	4.7e-79
g563	Calca_contig_25	PhoD-like phosphatase	PhoD	PF09423	65	557	267	8e-77
g565	Calca_contig_25	Cation transporting ATPase, C-terminus	Cation_ATPase_C	PF00689	915	1090	102	2.4e-28
g565	Calca_contig_25	Cation transporter/ATPase, N-terminus	Cation_ATPase_N	PF00690	109	187	66.7	3.9e-18
g565	Calca_contig_25	E1-E2 ATPase	E1-E2_ATPase	PF00122	204	443	183.4	4.4e-55
g565	Calca_contig_25	haloacid dehalogenase-like hydrolase	Hydrolase	PF00702	447	711	87.1	2.8e-24
g565	Calca_contig_25	haloacid dehalogenase-like hydrolase	Hydrolase	PF00702	753	820	87.1	2.8e-24
g565	Calca_contig_25	Cation transporting ATPase, C-terminus	Cation_ATPase_C	PF00689	915	1090	103.9	1e-27
g565	Calca_contig_25	Cation transporter/ATPase, N-terminus	Cation_ATPase_N	PF00690	109	187	68.6	4.1e-17
g565	Calca_contig_25	E1-E2 ATPase	E1-E2_ATPase	PF00122	204	443	185.4	2.9e-52
g565	Calca_contig_25	haloacid dehalogenase-like hydrolase	Hydrolase	PF00702	447	820	85.5	3.5e-22
g568	Calca_contig_25	ThiF family	ThiF	PF00899	69	203	175.9	2e-49
g568	Calca_contig_25	ThiF family	ThiF	PF00899	462	607	175.9	2e-49
g568	Calca_contig_25	Ubiquitin-activating enzyme e1 C-terminal domain	UBA_e1_C	PF09358	921	1049	245.4	2.4e-70
g568	Calca_contig_25	Repeat in ubiquitin-activating (UBA) protein	UBACT	PF02134	399	412	173.1	1.5e-48
g568	Calca_contig_25	Repeat in ubiquitin-activating (UBA) protein	UBACT	PF02134	750	799	173.1	1.5e-48
g568	Calca_contig_25	Repeat in ubiquitin-activating (UBA) protein	UBACT	PF02134	847	915	173.1	1.5e-48
g568	Calca_contig_25	ThiF family	ThiF	PF00899	69	203	179.8	1.4e-50
g568	Calca_contig_25	ThiF family	ThiF	PF00899	462	607	179.8	1.4e-50
g568	Calca_contig_25	Ubiquitin-activating enzyme e1 C-terminal domain	UBA_e1_C	PF09358	921	1049	247.3	6.5e-71
g568	Calca_contig_25	Repeat in ubiquitin-activating (UBA) protein	UBACT	PF02134	750	809	169	2.5e-47
g568	Calca_contig_25	Repeat in ubiquitin-activating (UBA) protein	UBACT	PF02134	847	915	169	2.5e-47
g571	Calca_contig_25	Sec1 family	Sec1	PF00995	25	452	212.1	2.6e-60
g571	Calca_contig_25	Sec1 family	Sec1	PF00995	545	595	212.1	2.6e-60
g571	Calca_contig_25	Sec1 family	Sec1	PF00995	25	595	197.8	5.3e-56
g574	Calca_contig_25	G-patch domain	G-patch	PF01585	179	225	27.1	1.1e-06
g574	Calca_contig_25	G-patch domain	G-patch	PF01585	179	225	29.1	3.2e-05
g576	Calca_contig_25	Amidase	Amidase	PF01425	144	405	175	4e-49
g576	Calca_contig_25	Amidase	Amidase	PF01425	517	566	175	4e-49
g576	Calca_contig_25	Amidase	Amidase	PF01425	144	566	136.9	1.1e-37
g577	Calca_contig_25	short chain dehydrogenase	adh_short	PF00106	5	141	30.4	1.1e-07
g577	Calca_contig_25	short chain dehydrogenase	adh_short	PF00106	5	171	6.1	9.8e-06
g581	Calca_contig_26	Mob1/phocein family	Mob1_phocein	PF03637	686	795	136.5	5.6e-39
g581	Calca_contig_26	Mob1/phocein family	Mob1_phocein	PF03637	831	897	136.5	5.6e-39
g581	Calca_contig_26	Mob1/phocein family	Mob1_phocein	PF03637	686	897	124.6	5.8e-34
g582	Calca_contig_26	Leo1-like protein	Leo1	PF04004	143	169	17.8	6.9e-05
g582	Calca_contig_26	Leo1-like protein	Leo1	PF04004	248	272	17.8	6.9e-05
g582	Calca_contig_26	Leo1-like protein	Leo1	PF04004	22	379	-70.3	0.00058
g584	Calca_contig_26	Patatin-like phospholipase	Patatin	PF01734	182	346	67.5	1.4e-17
g584	Calca_contig_26	Patatin-like phospholipase	Patatin	PF01734	182	393	42.9	2.3e-09
g587	Calca_contig_26	UTP--glucose-1-phosphate uridylyltransferase	UDPGP	PF01704	73	488	901.4	8.3e-268
g587	Calca_contig_26	UTP--glucose-1-phosphate uridylyltransferase	UDPGP	PF01704	73	488	903.3	2.3e-268
g591	Calca_contig_26	Dihydroneopterin aldolase	FolB	PF02152	179	209	46.5	4e-13
g591	Calca_contig_26	Dihydroneopterin aldolase	FolB	PF02152	225	292	46.5	4e-13
g591	Calca_contig_26	Dihydroneopterin aldolase	FolB	PF02152	179	292	44.7	6.4e-10
g594	Calca_contig_26	Cellulase (glycosyl hydrolase family 5)	Cellulase	PF00150	156	471	53.9	2.2e-15
g594	Calca_contig_26	Cellulase (glycosyl hydrolase family 5)	Cellulase	PF00150	156	471	55.7	3.2e-13
g598	Calca_contig_26	Ammonium Transporter Family	Ammonium_transp	PF00909	38	443	506.8	5.2e-160
g598	Calca_contig_26	Ammonium Transporter Family	Ammonium_transp	PF00909	38	443	508.7	1.4e-149
g599	Calca_contig_26	Histidine acid phosphatase	Acid_phosphat_A	PF00328	185	538	251.6	3.3e-72
g599	Calca_contig_26	Histidine acid phosphatase	Acid_phosphat_A	PF00328	185	538	253.5	9.3e-73
g600	Calca_contig_26	Taurine catabolism dioxygenase TauD, TfdA family	TauD	PF02668	75	342	70.1	2.2e-19
g600	Calca_contig_26	Taurine catabolism dioxygenase TauD, TfdA family	TauD	PF02668	75	342	71.9	4.2e-18
g603	Calca_contig_26	SWIM zinc finger	SWIM	PF04434	116	150	15.8	0.00045
g605	Calca_contig_26	RNA recognition motif. (a.k.a. RRM, RBD, or RNP domain)	RRM_1	PF00076	81	149	72.4	3.5e-19
g605	Calca_contig_26	RNA recognition motif. (a.k.a. RRM, RBD, or RNP domain)	RRM_1	PF00076	81	149	74.3	7.9e-19
g606	Calca_contig_26	TCP-1/cpn60 chaperonin family	Cpn60_TCP1	PF00118	36	533	569.5	6.7e-168
g606	Calca_contig_26	TCP-1/cpn60 chaperonin family	Cpn60_TCP1	PF00118	36	533	571.4	1.8e-168
g608	Calca_contig_26	Cytochrome C oxidase copper chaperone (COX17)	COX17	PF05051	10	76	25.6	2.4e-08
g608	Calca_contig_26	Cytochrome C oxidase copper chaperone (COX17)	COX17	PF05051	10	76	27.5	7e-06
g609	Calca_contig_26	Hsp20/alpha crystallin family	HSP20	PF00011	287	311	28.7	6.3e-07
g609	Calca_contig_26	Hsp20/alpha crystallin family	HSP20	PF00011	374	407	28.7	6.3e-07
g609	Calca_contig_26	Hsp20/alpha crystallin family	HSP20	PF00011	287	407	26.4	2.5e-05
g612	Calca_contig_26	Yeast cortical protein KAR9	KAR9	PF08580	386	1083	840.3	7.6e-254
g612	Calca_contig_26	Yeast cortical protein KAR9	KAR9	PF08580	386	1083	842.1	6.1e-250
g614	Calca_contig_26	DEAD/DEAH box helicase	DEAD	PF00270	817	995	118.4	2.6e-32
g614	Calca_contig_26	Helicase conserved C-terminal domain	Helicase_C	PF00271	878	905	88.1	1.7e-24
g614	Calca_contig_26	Helicase conserved C-terminal domain	Helicase_C	PF00271	1062	1138	88.1	1.7e-24
g614	Calca_contig_26	RQC domain	RQC	PF09382	1224	1330	73.8	1.5e-21
g614	Calca_contig_26	DEAD/DEAH box helicase	DEAD	PF00270	817	995	120.2	1.2e-32
g614	Calca_contig_26	Helicase conserved C-terminal domain	Helicase_C	PF00271	1062	1138	88.1	5.5e-23
g614	Calca_contig_26	RQC domain	RQC	PF09382	1224	1330	75.8	2.9e-19
g617	Calca_contig_26	Ankyrin repeat	Ank	PF00023	533	565	142.8	2e-39
g617	Calca_contig_26	Ankyrin repeat	Ank	PF00023	566	589	142.8	2e-39
g617	Calca_contig_26	Ankyrin repeat	Ank	PF00023	691	719	142.8	2e-39
g617	Calca_contig_26	Ankyrin repeat	Ank	PF00023	763	786	142.8	2e-39
g617	Calca_contig_26	Ankyrin repeat	Ank	PF00023	812	840	142.8	2e-39
g617	Calca_contig_26	Ankyrin repeat	Ank	PF00023	873	901	142.8	2e-39
g617	Calca_contig_26	Ankyrin repeat	Ank	PF00023	1381	1403	142.8	2e-39
g617	Calca_contig_26	Ankyrin repeat	Ank	PF00023	1484	1516	142.8	2e-39
g617	Calca_contig_26	Ankyrin repeat	Ank	PF00023	1615	1647	142.8	2e-39
g617	Calca_contig_26	Ankyrin repeat	Ank	PF00023	533	565	151.8	3.8e-42
g617	Calca_contig_26	Ankyrin repeat	Ank	PF00023	566	598	151.8	3.8e-42
g617	Calca_contig_26	Ankyrin repeat	Ank	PF00023	687	719	151.8	3.8e-42
g617	Calca_contig_26	Ankyrin repeat	Ank	PF00023	763	797	151.8	3.8e-42
g617	Calca_contig_26	Ankyrin repeat	Ank	PF00023	808	840	151.8	3.8e-42
g617	Calca_contig_26	Ankyrin repeat	Ank	PF00023	869	901	151.8	3.8e-42
g617	Calca_contig_26	Ankyrin repeat	Ank	PF00023	1381	1416	151.8	3.8e-42
g617	Calca_contig_26	Ankyrin repeat	Ank	PF00023	1484	1516	151.8	3.8e-42
g617	Calca_contig_26	Ankyrin repeat	Ank	PF00023	1615	1647	151.8	3.8e-42
g620	Calca_contig_26	DEAD/DEAH box helicase	DEAD	PF00270	155	318	70.3	6.4e-19
g620	Calca_contig_26	Helicase conserved C-terminal domain	Helicase_C	PF00271	560	622	84.7	1.7e-23
g620	Calca_contig_26	Type III restriction enzyme, res subunit	ResIII	PF04851	151	313	72.5	2.4e-19
g620	Calca_contig_26	DEAD/DEAH box helicase	DEAD	PF00270	155	318	72	3.8e-18
g620	Calca_contig_26	Helicase conserved C-terminal domain	Helicase_C	PF00271	539	622	85.9	2.5e-22
g620	Calca_contig_26	Type III restriction enzyme, res subunit	ResIII	PF04851	151	313	74.2	8.7e-19
g621	Calca_contig_26	TAP C-terminal domain	TAP_C	PF03943	614	662	57.2	1.1e-16
g621	Calca_contig_26	TAP C-terminal domain	TAP_C	PF03943	614	662	59.1	3e-14
g625	Calca_contig_27	alpha/beta hydrolase fold	Abhydrolase_3	PF07859	97	158	86.6	6.6e-23
g625	Calca_contig_27	alpha/beta hydrolase fold	Abhydrolase_3	PF07859	194	335	86.6	6.6e-23
g625	Calca_contig_27	alpha/beta hydrolase fold	Abhydrolase_3	PF07859	97	335	87.6	7.9e-23
g627	Calca_contig_27	short chain dehydrogenase	adh_short	PF00106	8	145	50.3	3.5e-13
g627	Calca_contig_27	short chain dehydrogenase	adh_short	PF00106	8	157	34.3	1.4e-07
g628	Calca_contig_27	Myb-like DNA-binding domain	Myb_DNA-binding	PF00249	11	61	113.8	1e-30
g628	Calca_contig_27	Myb-like DNA-binding domain	Myb_DNA-binding	PF00249	67	112	113.8	1e-30
g628	Calca_contig_27	Myb-like DNA-binding domain	Myb_DNA-binding	PF00249	118	160	113.8	1e-30
g628	Calca_contig_27	Myb-like DNA-binding domain	Myb_DNA-binding	PF00249	11	61	114.4	6.6e-31
g628	Calca_contig_27	Myb-like DNA-binding domain	Myb_DNA-binding	PF00249	67	112	114.4	6.6e-31
g628	Calca_contig_27	Myb-like DNA-binding domain	Myb_DNA-binding	PF00249	118	164	114.4	6.6e-31
g629	Calca_contig_27	Cytochrome P450	p450	PF00067	123	466	99.4	2.6e-30
g629	Calca_contig_27	Cytochrome P450	p450	PF00067	35	475	72.3	3.2e-18
g630	Calca_contig_27	O-methyltransferase	Methyltransf_2	PF00891	302	313	65.3	3.3e-18
g630	Calca_contig_27	O-methyltransferase	Methyltransf_2	PF00891	354	466	65.3	3.3e-18
g630	Calca_contig_27	O-methyltransferase	Methyltransf_2	PF00891	174	466	25.2	1.2e-09
g631	Calca_contig_27	FAD dependent oxidoreductase	DAO	PF01266	89	112	16	0.00051
g631	Calca_contig_27	FAD binding domain	FAD_binding_2	PF00890	89	121	15.6	0.00031
g631	Calca_contig_27	FAD binding domain	FAD_binding_3	PF01494	87	152	167.2	3.2e-49
g631	Calca_contig_27	FAD binding domain	FAD_binding_3	PF01494	229	293	167.2	3.2e-49
g631	Calca_contig_27	FAD binding domain	FAD_binding_3	PF01494	351	462	167.2	3.2e-49
g631	Calca_contig_27	Lycopene cyclase protein	Lycopene_cycl	PF05834	89	115	14.6	0.00087
g631	Calca_contig_27	FAD binding domain	FAD_binding_3	PF01494	87	462	138.8	3.2e-38
g632	Calca_contig_27	AMP-binding enzyme	AMP-binding	PF00501	4	76	21	1.8e-05
g632	Calca_contig_27	AMP-binding enzyme	AMP-binding	PF00501	109	148	21	1.8e-05
g632	Calca_contig_27	Male sterility protein	NAD_binding_4	PF07993	401	687	-3	2.6e-08
g633	Calca_contig_27	Acyl transferase domain	Acyl_transf_1	PF00698	699	982	148.6	3.5e-41
g633	Calca_contig_27	Beta-ketoacyl synthase, N-terminal domain	ketoacyl-synt	PF00109	165	416	325.7	1.7e-94
g633	Calca_contig_27	Beta-ketoacyl synthase, C-terminal domain	Ketoacyl-synt_C	PF02801	424	541	172.1	2.8e-48
g633	Calca_contig_27	Phosphopantetheine attachment site	PP-binding	PF00550	1441	1507	29.2	6.8e-07
g633	Calca_contig_27	Phosphopantetheine attachment site	PP-binding	PF00550	1551	1599	29.2	6.8e-07
g633	Calca_contig_27	Thioesterase domain	Thioesterase	PF00975	1675	1786	67.8	1.9e-18
g633	Calca_contig_27	Thioesterase domain	Thioesterase	PF00975	1870	1904	67.8	1.9e-18
g633	Calca_contig_27	Acyl transferase domain	Acyl_transf_1	PF00698	699	1029	140.1	1.2e-38
g633	Calca_contig_27	Beta-ketoacyl synthase, N-terminal domain	ketoacyl-synt	PF00109	165	416	327.5	4.7e-95
g633	Calca_contig_27	Beta-ketoacyl synthase, C-terminal domain	Ketoacyl-synt_C	PF02801	424	541	174.1	7.4e-49
g633	Calca_contig_27	Thioesterase domain	Thioesterase	PF00975	1675	1904	53.6	1.3e-12
g635	Calca_contig_27	AMP-binding enzyme	AMP-binding	PF00501	84	321	16.6	0.0003
g635	Calca_contig_27	AMP-binding enzyme	AMP-binding	PF00501	39	441	-16.1	2.3e-06
g636	Calca_contig_27	Alpha amylase, catalytic domain	Alpha-amylase	PF00128	18	437	383.8	5.3e-112
g636	Calca_contig_27	Alpha amylase, catalytic domain	Alpha-amylase	PF00128	18	437	385.7	1.5e-112
g637	Calca_contig_27	Major Facilitator Superfamily	MFS_1	PF07690	69	470	74.1	8e-20
g637	Calca_contig_27	Sugar (and other) transporter	Sugar_tr	PF00083	79	522	250.3	8.5e-72
g637	Calca_contig_27	Major Facilitator Superfamily	MFS_1	PF07690	69	470	76	2.5e-19
g637	Calca_contig_27	Sugar (and other) transporter	Sugar_tr	PF00083	67	522	247.3	6.5e-71
g638	Calca_contig_27	Glycosyl hydrolases family 32 C terminal	Glyco_hydro_32C	PF08244	216	304	51.3	9.9e-14
g638	Calca_contig_27	Glycosyl hydrolases family 32 N terminal	Glyco_hydro_32N	PF00251	1	29	19.8	2.9e-06
g638	Calca_contig_27	Glycosyl hydrolases family 32 N terminal	Glyco_hydro_32N	PF00251	114	156	19.8	2.9e-06
g638	Calca_contig_27	Glycosyl hydrolases family 32 C terminal	Glyco_hydro_32C	PF08244	216	304	53.1	2e-12
g639	Calca_contig_27	Fungal specific transcription factor domain	Fungal_trans	PF04082	48	142	37.3	1.8e-10
g639	Calca_contig_27	Fungal specific transcription factor domain	Fungal_trans	PF04082	48	142	39.2	3e-08
g640	Calca_contig_27	Heterokaryon incompatibility protein (HET)	HET	PF06985	325	452	97.4	6.2e-33
g640	Calca_contig_27	Heterokaryon incompatibility protein (HET)	HET	PF06985	325	452	99.1	2.8e-26
g642	Calca_contig_27	C4-dicarboxylate transporter/malic acid transport protein	C4dic_mal_tran	PF03595	79	380	155.2	7.8e-45
g642	Calca_contig_27	C4-dicarboxylate transporter/malic acid transport protein	C4dic_mal_tran	PF03595	79	380	157.1	9.4e-44
g643	Calca_contig_27	Cation transporting ATPase, C-terminus	Cation_ATPase_C	PF00689	821	979	81.2	1.9e-22
g643	Calca_contig_27	Cation transporter/ATPase, N-terminus	Cation_ATPase_N	PF00690	58	123	67.5	2.4e-18
g643	Calca_contig_27	E1-E2 ATPase	E1-E2_ATPase	PF00122	97	121	223	4.5e-67
g643	Calca_contig_27	E1-E2 ATPase	E1-E2_ATPase	PF00122	129	387	223	4.5e-67
g643	Calca_contig_27	haloacid dehalogenase-like hydrolase	Hydrolase	PF00702	391	720	92.2	1e-25
g643	Calca_contig_27	haloacid dehalogenase-like hydrolase	Hydrolase_3	PF08282	698	744	18	0.00029
g643	Calca_contig_27	Cation transporting ATPase, C-terminus	Cation_ATPase_C	PF00689	821	990	74.5	7.2e-19
g643	Calca_contig_27	Cation transporter/ATPase, N-terminus	Cation_ATPase_N	PF00690	45	123	66.9	1.4e-16
g643	Calca_contig_27	E1-E2 ATPase	E1-E2_ATPase	PF00122	129	387	229.6	1.4e-65
g643	Calca_contig_27	haloacid dehalogenase-like hydrolase	Hydrolase	PF00702	391	720	94.1	8.6e-25
g645	Calca_contig_27	Pre-mRNA cleavage complex II protein Clp1	Clp1	PF06807	206	283	34.6	4.4e-08
g645	Calca_contig_27	Pre-mRNA cleavage complex II protein Clp1	Clp1	PF06807	405	427	34.6	4.4e-08
g645	Calca_contig_27	Pre-mRNA cleavage complex II protein Clp1	Clp1	PF06807	165	444	1.7	7.4e-14
g647	Calca_contig_27	Inositol polyphosphate kinase	IPK	PF03770	167	403	91.3	4.7e-26
g647	Calca_contig_27	Inositol polyphosphate kinase	IPK	PF03770	110	403	60.7	9.7e-15
g649	Calca_contig_28	NmrA-like family	NmrA	PF05368	5	237	-65.7	0.0003
g650	Calca_contig_28	Fungal specific transcription factor domain	Fungal_trans	PF04082	142	239	53.8	2e-15
g650	Calca_contig_28	Fungal specific transcription factor domain	Fungal_trans	PF04082	142	239	55.7	3.2e-13
g651	Calca_contig_28	Major Facilitator Superfamily	MFS_1	PF07690	32	297	101.9	2e-27
g651	Calca_contig_28	Sugar (and other) transporter	Sugar_tr	PF00083	63	128	15.6	0.00053
g651	Calca_contig_28	Sugar (and other) transporter	Sugar_tr	PF00083	181	205	15.6	0.00053
g651	Calca_contig_28	Major Facilitator Superfamily	MFS_1	PF07690	32	292	44.9	5.6e-10
g652	Calca_contig_28	Carboxylesterase	COesterase	PF00135	5	545	291.7	3e-84
g652	Calca_contig_28	Carboxylesterase	COesterase	PF00135	5	545	293.5	8.2e-85
g654	Calca_contig_28	haloacid dehalogenase-like hydrolase	Hydrolase	PF00702	11	200	58.2	5.5e-16
g654	Calca_contig_28	haloacid dehalogenase-like hydrolase	Hydrolase	PF00702	11	200	60.1	1.5e-14
g656	Calca_contig_28	Fungal Zn(2)-Cys(6) binuclear cluster domain	Zn_clus	PF00172	457	475	16.3	0.0003
g657	Calca_contig_28	short chain dehydrogenase	adh_short	PF00106	39	130	40	2.5e-10
g657	Calca_contig_28	short chain dehydrogenase	adh_short	PF00106	39	197	10.7	4.9e-06
g660	Calca_contig_28	Glycosyl hydrolase family 47	Glyco_hydro_47	PF01532	42	527	468.8	1.4e-137
g660	Calca_contig_28	Glycosyl hydrolase family 47	Glyco_hydro_47	PF01532	42	527	470.7	3.6e-138
g661	Calca_contig_28	C4-dicarboxylate transporter/malic acid transport protein	C4dic_mal_tran	PF03595	48	355	125.7	3.1e-36
g661	Calca_contig_28	C4-dicarboxylate transporter/malic acid transport protein	C4dic_mal_tran	PF03595	48	355	127.6	7.1e-35
g662	Calca_contig_28	Serine carboxypeptidase	Peptidase_S10	PF00450	75	461	186.1	1.7e-52
g662	Calca_contig_28	Serine carboxypeptidase	Peptidase_S10	PF00450	75	523	180.9	6.4e-51
g663	Calca_contig_28	Amidohydrolase family	Amidohydro_1	PF01979	56	67	23.4	2.5e-06
g663	Calca_contig_28	Amidohydrolase family	Amidohydro_1	PF01979	471	499	23.4	2.5e-06
g663	Calca_contig_28	Amidohydrolase family	Amidohydro_3	PF07969	56	98	68.3	1e-17
g663	Calca_contig_28	Amidohydrolase family	Amidohydro_3	PF07969	177	339	68.3	1e-17
g663	Calca_contig_28	Amidohydrolase family	Amidohydro_3	PF07969	423	497	68.3	1e-17
g663	Calca_contig_28	D-aminoacylase, C-terminal region	D-aminoacyl_C	PF07908	500	547	65.2	1e-18
g663	Calca_contig_28	Amidohydrolase family	Amidohydro_3	PF07969	56	497	54.8	5.9e-13
g663	Calca_contig_28	D-aminoacylase, C-terminal region	D-aminoacyl_C	PF07908	500	547	67.2	1.1e-16
g666	Calca_contig_28	Sodium/hydrogen exchanger family	Na_H_Exchanger	PF00999	46	437	275	3.1e-79
g666	Calca_contig_28	Sodium/hydrogen exchanger family	Na_H_Exchanger	PF00999	46	437	276.8	8.6e-80
g668	Calca_contig_28	Glutamine amidotransferase class-I	GATase	PF00117	19	100	127	1.1e-34
g668	Calca_contig_28	Glutamine amidotransferase class-I	GATase	PF00117	134	207	127	1.1e-34
g668	Calca_contig_28	GMP synthase C terminal domain	GMP_synt_C	PF00958	458	496	122.7	1e-49
g668	Calca_contig_28	GMP synthase C terminal domain	GMP_synt_C	PF00958	498	550	122.7	1e-49
g668	Calca_contig_28	Peptidase C26	Peptidase_C26	PF07722	81	99	9.1	0.00017
g668	Calca_contig_28	Peptidase C26	Peptidase_C26	PF07722	174	189	9.1	0.00017
g668	Calca_contig_28	tRNA methyl transferase	tRNA_Me_trans	PF03054	235	257	13.3	0.00081
g668	Calca_contig_28	Glutamine amidotransferase class-I	GATase	PF00117	19	207	124.4	6.5e-34
g668	Calca_contig_28	GMP synthase C terminal domain	GMP_synt_C	PF00958	458	550	123.7	1.1e-33
g671	Calca_contig_28	Amino acid permease	AA_permease	PF00324	117	588	563.5	4.3e-166
g671	Calca_contig_28	Amino acid permease	AA_permease	PF00324	117	588	565.4	1.2e-166
g674	Calca_contig_28	Glutamine synthetase, catalytic domain	Gln-synt_C	PF00120	140	389	260.8	5.6e-75
g674	Calca_contig_28	Glutamine synthetase, beta-Grasp domain	Gln-synt_N	PF03951	25	55	108	7.3e-32
g674	Calca_contig_28	Glutamine synthetase, beta-Grasp domain	Gln-synt_N	PF03951	76	134	108	7.3e-32
g674	Calca_contig_28	Glutamine synthetase, catalytic domain	Gln-synt_C	PF00120	140	389	262.7	1.6e-75
g674	Calca_contig_28	Glutamine synthetase, beta-Grasp domain	Gln-synt_N	PF03951	25	134	93	1.9e-24
g675	Calca_contig_28	Aldo/keto reductase family	Aldo_ket_red	PF00248	36	310	174.7	4.9e-49
g675	Calca_contig_28	Aldo/keto reductase family	Aldo_ket_red	PF00248	16	310	175	3.9e-49
g677	Calca_contig_28	DJ-1/PfpI family	DJ-1_PfpI	PF01965	92	151	21.7	1.8e-05
g677	Calca_contig_28	DJ-1/PfpI family	DJ-1_PfpI	PF01965	215	246	21.7	1.8e-05
g679	Calca_contig_28	short chain dehydrogenase	adh_short	PF00106	8	98	26.1	1.8e-06
g679	Calca_contig_28	Saccharopine dehydrogenase	Saccharop_dh	PF03435	10	79	17.5	0.00056
g679	Calca_contig_28	short chain dehydrogenase	adh_short	PF00106	8	158	-1.3	3e-05
g680	Calca_contig_28	Major Facilitator Superfamily	MFS_1	PF07690	73	241	100.7	4e-27
g680	Calca_contig_28	Major Facilitator Superfamily	MFS_1	PF07690	273	448	100.7	4e-27
g680	Calca_contig_28	Major Facilitator Superfamily	MFS_1	PF07690	73	410	113.4	1.3e-30
g680	Calca_contig_28	Sugar (and other) transporter	Sugar_tr	PF00083	72	451	-114.7	0.00033
g681	Calca_contig_28	CFEM domain	CFEM	PF05730	33	97	23.8	3.2e-05
g681	Calca_contig_28	CFEM domain	CFEM	PF05730	33	97	25.6	0.00037
g682	Calca_contig_28	Tetratricopeptide repeat	TPR_1	PF00515	969	1002	45.4	1.5e-11
g682	Calca_contig_28	Tetratricopeptide repeat	TPR_1	PF00515	1003	1024	45.4	1.5e-11
g682	Calca_contig_28	Tetratricopeptide repeat	TPR_1	PF00515	1055	1083	45.4	1.5e-11
g682	Calca_contig_28	Tetratricopeptide repeat	TPR_2	PF07719	969	1002	42.9	1.2e-10
g682	Calca_contig_28	Tetratricopeptide repeat	TPR_2	PF07719	1003	1036	42.9	1.2e-10
g682	Calca_contig_28	Tetratricopeptide repeat	TPR_2	PF07719	1055	1088	42.9	1.2e-10
g682	Calca_contig_28	Tetratricopeptide repeat	TPR_1	PF00515	969	1002	40.4	1.3e-08
g682	Calca_contig_28	Tetratricopeptide repeat	TPR_1	PF00515	1003	1036	40.4	1.3e-08
g682	Calca_contig_28	Tetratricopeptide repeat	TPR_1	PF00515	1055	1088	40.4	1.3e-08
g682	Calca_contig_28	Tetratricopeptide repeat	TPR_2	PF07719	969	1002	42.5	3.1e-09
g682	Calca_contig_28	Tetratricopeptide repeat	TPR_2	PF07719	1003	1036	42.5	3.1e-09
g682	Calca_contig_28	Tetratricopeptide repeat	TPR_2	PF07719	1055	1088	42.5	3.1e-09
g682	Calca_contig_28	Tetratricopeptide repeat	TPR_2	PF07719	1330	1363	42.5	3.1e-09
g685	Calca_contig_29	Fatty acid hydroxylase superfamily	FA_hydroxylase	PF04116	200	326	90.8	7.8e-26
g685	Calca_contig_29	Fatty acid hydroxylase superfamily	FA_hydroxylase	PF04116	200	326	92.7	2.3e-24
g686	Calca_contig_29	Glycosyl hydrolases family 2, immunoglobulin-like beta-sandwich domain	Glyco_hydro_2	PF00703	303	352	15	0.00022
g687	Calca_contig_29	STAS domain	STAS	PF01740	508	647	30.1	9.2e-08
g687	Calca_contig_29	Sulfate transporter family	Sulfate_transp	PF00916	157	469	213.1	1.3e-60
g687	Calca_contig_29	STAS domain	STAS	PF01740	496	647	31.4	6.7e-06
g687	Calca_contig_29	Sulfate transporter family	Sulfate_transp	PF00916	157	469	215.1	3.4e-61
g690	Calca_contig_29	Cupin	Cupin_1	PF00190	131	263	110	3.4e-30
g690	Calca_contig_29	Cupin	Cupin_1	PF00190	300	407	110	3.4e-30
g690	Calca_contig_29	Cupin domain	Cupin_2	PF07883	152	226	114.8	6.5e-34
g690	Calca_contig_29	Cupin domain	Cupin_2	PF07883	332	407	114.8	6.5e-34
g690	Calca_contig_29	Protein of unknown function (DUF861)	Cupin_3	PF05899	165	214	19.5	5.5e-05
g690	Calca_contig_29	Protein of unknown function (DUF861)	Cupin_3	PF05899	343	401	19.5	5.5e-05
g690	Calca_contig_29	Cupin	Cupin_1	PF00190	120	263	108.6	3.8e-29
g690	Calca_contig_29	Cupin	Cupin_1	PF00190	300	426	108.6	3.8e-29
g690	Calca_contig_29	Cupin domain	Cupin_2	PF07883	152	226	118.7	3.4e-32
g690	Calca_contig_29	Cupin domain	Cupin_2	PF07883	332	407	118.7	3.4e-32
g693	Calca_contig_29	Protein of unknown function (DUF1275)	DUF1275	PF06912	87	161	21.2	9.2e-05
g695	Calca_contig_29	Major Facilitator Superfamily	MFS_1	PF07690	51	419	124.3	7.1e-34
g695	Calca_contig_29	Major Facilitator Superfamily	MFS_1	PF07690	51	419	126.2	1.9e-34
g696	Calca_contig_29	Protein kinase domain	Pkinase	PF00069	129	417	326.5	9.4e-95
g696	Calca_contig_29	Protein tyrosine kinase	Pkinase_Tyr	PF07714	130	254	81.6	3.5e-23
g696	Calca_contig_29	Protein tyrosine kinase	Pkinase_Tyr	PF07714	298	375	81.6	3.5e-23
g696	Calca_contig_29	Protein kinase domain	Pkinase	PF00069	129	417	328.4	2.5e-95
g696	Calca_contig_29	Protein tyrosine kinase	Pkinase_Tyr	PF07714	129	412	64.4	4.9e-16
g700	Calca_contig_29	Mov34/MPN/PAD-1 family	Mov34	PF01398	17	130	176.9	1e-49
g700	Calca_contig_29	Mov34/MPN/PAD-1 family	Mov34	PF01398	17	130	178.9	2.7e-50
g701	Calca_contig_29	Histone deacetylase domain	Hist_deacetyl	PF00850	23	334	585.1	1.4e-172
g701	Calca_contig_29	Histone deacetylase domain	Hist_deacetyl	PF00850	23	334	587	3.6e-173
g702	Calca_contig_29	Cyclophilin type peptidyl-prolyl cis-trans isomerase/CLD	Pro_isomerase	PF00160	5	171	360.6	5.2e-105
g702	Calca_contig_29	Cyclophilin type peptidyl-prolyl cis-trans isomerase/CLD	Pro_isomerase	PF00160	5	171	362.5	1.4e-105
g703	Calca_contig_29	RNA polymerase Rpc34 subunit	RNA_pol_Rpc34	PF05158	89	200	134.1	3e-37
g703	Calca_contig_29	RNA polymerase Rpc34 subunit	RNA_pol_Rpc34	PF05158	267	386	134.1	3e-37
g703	Calca_contig_29	RNA polymerase Rpc34 subunit	RNA_pol_Rpc34	PF05158	20	386	96.3	1.9e-25
g704	Calca_contig_29	ENTH domain	ENTH	PF01417	32	156	234.7	4.2e-67
g704	Calca_contig_29	ENTH domain	ENTH	PF01417	32	156	236.6	1.1e-67
g708	Calca_contig_29	ZIP Zinc transporter	Zip	PF02535	41	433	192.4	2.3e-54
g708	Calca_contig_29	ZIP Zinc transporter	Zip	PF02535	41	433	194.2	6.3e-55
g711	Calca_contig_29	alpha/beta hydrolase fold	Abhydrolase_1	PF00561	52	153	59.5	3.7e-16
g711	Calca_contig_29	alpha/beta hydrolase fold	Abhydrolase_1	PF00561	226	276	59.5	3.7e-16
g711	Calca_contig_29	alpha/beta hydrolase fold	Abhydrolase_1	PF00561	52	276	58.8	3.7e-14
g714	Calca_contig_29	Glycosyl transferase family 8	Glyco_transf_8	PF01501	159	191	28.8	5.8e-08
g714	Calca_contig_29	Glycosyl transferase family 8	Glyco_transf_8	PF01501	67	326	-13.1	2e-05
g715	Calca_contig_30	Transmembrane amino acid transporter protein	Aa_trans	PF01490	67	354	216.8	1e-61
g715	Calca_contig_30	Transmembrane amino acid transporter protein	Aa_trans	PF01490	372	444	216.8	1e-61
g715	Calca_contig_30	Transmembrane amino acid transporter protein	Aa_trans	PF01490	67	444	213.3	1.1e-60
g716	Calca_contig_30	Mandelate racemase / muconate lactonizing enzyme, C-terminal domain	MR_MLE	PF01188	126	228	63.4	2.2e-18
g716	Calca_contig_30	Mandelate racemase / muconate lactonizing enzyme, N-terminal domain	MR_MLE_N	PF02746	6	108	92.1	2.5e-29
g716	Calca_contig_30	Mandelate racemase / muconate lactonizing enzyme, C-terminal domain	MR_MLE	PF01188	126	228	65.3	4e-16
g716	Calca_contig_30	Mandelate racemase / muconate lactonizing enzyme, N-terminal domain	MR_MLE_N	PF02746	6	108	93.9	9.8e-25
g718	Calca_contig_30	CoA-transferase family III	CoA_transf_3	PF02515	114	302	181.6	1.8e-52
g718	Calca_contig_30	CoA-transferase family III	CoA_transf_3	PF02515	114	302	183.4	1.1e-51
g720	Calca_contig_30	Major Facilitator Superfamily	MFS_1	PF07690	59	429	137.9	5.8e-38
g720	Calca_contig_30	Major Facilitator Superfamily	MFS_1	PF07690	59	429	139.8	1.6e-38
g722	Calca_contig_30	Fungal Zn(2)-Cys(6) binuclear cluster domain	Zn_clus	PF00172	9	48	28.5	3.8e-08
g722	Calca_contig_30	Fungal Zn(2)-Cys(6) binuclear cluster domain	Zn_clus	PF00172	9	48	30.4	1.4e-05
g724	Calca_contig_30	Glycosyl hydrolases family 35	Glyco_hydro_35	PF01301	37	362	404.9	2.4e-118
g724	Calca_contig_30	Glycosyl hydrolases family 35	Glyco_hydro_35	PF01301	37	362	406.8	6.3e-119
g725	Calca_contig_30	Ricin-type beta-trefoil lectin domain	Ricin_B_lectin	PF00652	408	518	20.5	6.2e-06
g725	Calca_contig_30	Melibiase	Melibiase	PF02065	13	333	-196.6	0.00023
g726	Calca_contig_30	Ankyrin repeat	Ank	PF00023	81	113	196.4	1.4e-55
g726	Calca_contig_30	Ankyrin repeat	Ank	PF00023	114	146	196.4	1.4e-55
g726	Calca_contig_30	Ankyrin repeat	Ank	PF00023	147	179	196.4	1.4e-55
g726	Calca_contig_30	Ankyrin repeat	Ank	PF00023	180	205	196.4	1.4e-55
g726	Calca_contig_30	Ankyrin repeat	Ank	PF00023	215	247	196.4	1.4e-55
g726	Calca_contig_30	Ankyrin repeat	Ank	PF00023	248	280	196.4	1.4e-55
g726	Calca_contig_30	Ankyrin repeat	Ank	PF00023	81	113	204.5	5.3e-58
g726	Calca_contig_30	Ankyrin repeat	Ank	PF00023	114	146	204.5	5.3e-58
g726	Calca_contig_30	Ankyrin repeat	Ank	PF00023	147	179	204.5	5.3e-58
g726	Calca_contig_30	Ankyrin repeat	Ank	PF00023	180	212	204.5	5.3e-58
g726	Calca_contig_30	Ankyrin repeat	Ank	PF00023	215	247	204.5	5.3e-58
g726	Calca_contig_30	Ankyrin repeat	Ank	PF00023	248	280	204.5	5.3e-58
g729	Calca_contig_30	Bacterial low temperature requirement A protein (LtrA)	LtrA	PF06772	38	120	18.8	3.9e-05
g729	Calca_contig_30	Bacterial low temperature requirement A protein (LtrA)	LtrA	PF06772	38	410	-70.9	6.4e-05
g730	Calca_contig_30	Semialdehyde dehydrogenase, NAD binding domain	Semialdhyde_dh	PF01118	108	235	101.3	1.1e-28
g730	Calca_contig_30	Semialdehyde dehydrogenase, NAD binding domain	Semialdhyde_dh	PF01118	108	235	103.1	1.7e-27
g730	Calca_contig_30	Semialdehyde dehydrogenase, dimerisation domain	Semialdhyde_dhC	PF02774	252	400	10.6	5.3e-06
g736	Calca_contig_30	BNR/Asp-box repeat	BNR	PF02012	65	76	58.4	4.3e-16
g736	Calca_contig_30	BNR/Asp-box repeat	BNR	PF02012	108	119	58.4	4.3e-16
g736	Calca_contig_30	BNR/Asp-box repeat	BNR	PF02012	389	400	58.4	4.3e-16
g736	Calca_contig_30	BNR/Asp-box repeat	BNR	PF02012	450	461	58.4	4.3e-16
g736	Calca_contig_30	BNR/Asp-box repeat	BNR	PF02012	493	504	58.4	4.3e-16
g736	Calca_contig_30	BNR/Asp-box repeat	BNR	PF02012	746	757	58.4	4.3e-16
g736	Calca_contig_30	BNR/Asp-box repeat	BNR	PF02012	786	797	58.4	4.3e-16
g736	Calca_contig_30	BNR/Asp-box repeat	BNR	PF02012	841	852	58.4	4.3e-16
g736	Calca_contig_30	BNR/Asp-box repeat	BNR	PF02012	1043	1054	58.4	4.3e-16
g736	Calca_contig_30	BNR/Asp-box repeat	BNR	PF02012	1123	1134	58.4	4.3e-16
g736	Calca_contig_30	BNR/Asp-box repeat	BNR	PF02012	1169	1180	58.4	4.3e-16
g736	Calca_contig_30	BNR/Asp-box repeat	BNR	PF02012	65	76	80.3	1.2e-20
g736	Calca_contig_30	BNR/Asp-box repeat	BNR	PF02012	108	119	80.3	1.2e-20
g736	Calca_contig_30	BNR/Asp-box repeat	BNR	PF02012	389	400	80.3	1.2e-20
g736	Calca_contig_30	BNR/Asp-box repeat	BNR	PF02012	450	461	80.3	1.2e-20
g736	Calca_contig_30	BNR/Asp-box repeat	BNR	PF02012	493	504	80.3	1.2e-20
g736	Calca_contig_30	BNR/Asp-box repeat	BNR	PF02012	746	757	80.3	1.2e-20
g736	Calca_contig_30	BNR/Asp-box repeat	BNR	PF02012	786	797	80.3	1.2e-20
g736	Calca_contig_30	BNR/Asp-box repeat	BNR	PF02012	841	852	80.3	1.2e-20
g736	Calca_contig_30	BNR/Asp-box repeat	BNR	PF02012	1043	1054	80.3	1.2e-20
g736	Calca_contig_30	BNR/Asp-box repeat	BNR	PF02012	1123	1134	80.3	1.2e-20
g736	Calca_contig_30	BNR/Asp-box repeat	BNR	PF02012	1169	1180	80.3	1.2e-20
g739	Calca_contig_30	Amino acid permease	AA_permease	PF00324	111	577	605.2	1.2e-178
g739	Calca_contig_30	Amino acid permease	AA_permease	PF00324	111	577	607.1	3.3e-179
g741	Calca_contig_30	Glycosyl hydrolase family 47	Glyco_hydro_47	PF01532	172	665	552.8	7.3e-163
g741	Calca_contig_30	Glycosyl hydrolase family 47	Glyco_hydro_47	PF01532	172	665	554.7	2e-163
g743	Calca_contig_30	RNA recognition motif. (a.k.a. RRM, RBD, or RNP domain)	RRM_1	PF00076	30	103	32.3	5.9e-08
g743	Calca_contig_30	RNA recognition motif. (a.k.a. RRM, RBD, or RNP domain)	RRM_1	PF00076	30	103	34.3	9e-07
g744	Calca_contig_30	WD domain, G-beta repeat	WD40	PF00400	44	82	63.5	1.7e-16
g744	Calca_contig_30	WD domain, G-beta repeat	WD40	PF00400	88	122	63.5	1.7e-16
g744	Calca_contig_30	WD domain, G-beta repeat	WD40	PF00400	134	172	63.5	1.7e-16
g744	Calca_contig_30	WD domain, G-beta repeat	WD40	PF00400	195	231	63.5	1.7e-16
g744	Calca_contig_30	WD domain, G-beta repeat	WD40	PF00400	350	361	63.5	1.7e-16
g744	Calca_contig_30	WD domain, G-beta repeat	WD40	PF00400	44	82	69.8	1.8e-17
g744	Calca_contig_30	WD domain, G-beta repeat	WD40	PF00400	88	126	69.8	1.8e-17
g744	Calca_contig_30	WD domain, G-beta repeat	WD40	PF00400	134	172	69.8	1.8e-17
g744	Calca_contig_30	WD domain, G-beta repeat	WD40	PF00400	195	233	69.8	1.8e-17
g744	Calca_contig_30	WD domain, G-beta repeat	WD40	PF00400	319	361	69.8	1.8e-17
g746	Calca_contig_30	Endoribonuclease L-PSP	Ribonuc_L-PSP	PF01042	9	125	170.2	1.1e-47
g746	Calca_contig_30	Endoribonuclease L-PSP	Ribonuc_L-PSP	PF01042	9	125	172.1	3e-48
g748	Calca_contig_30	MIR domain	MIR	PF02815	350	523	108.4	5.4e-32
g748	Calca_contig_30	Dolichyl-phosphate-mannose-protein mannosyltransferase	PMT	PF02366	56	306	327	6.6e-95
g748	Calca_contig_30	MIR domain	MIR	PF02815	350	523	110.3	1.2e-29
g748	Calca_contig_30	Dolichyl-phosphate-mannose-protein mannosyltransferase	PMT	PF02366	56	306	329	1.7e-95
g754	Calca_contig_30	GDSL-like Lipase/Acylhydrolase	Lipase_GDSL	PF00657	38	225	62.8	3.1e-18
g754	Calca_contig_30	GDSL-like Lipase/Acylhydrolase	Lipase_GDSL	PF00657	38	225	64.3	8.5e-16
g755	Calca_contig_30	NACHT domain	NACHT	PF05729	236	261	15.6	0.00053
g755	Calca_contig_30	Rad17 cell cycle checkpoint protein	Rad17	PF03215	193	270	133.5	1.2e-36
g755	Calca_contig_30	Rad17 cell cycle checkpoint protein	Rad17	PF03215	319	436	133.5	1.2e-36
g755	Calca_contig_30	Rad17 cell cycle checkpoint protein	Rad17	PF03215	511	529	133.5	1.2e-36
g755	Calca_contig_30	Rad17 cell cycle checkpoint protein	Rad17	PF03215	191	707	65.7	3.1e-16
g758	Calca_contig_30	Helicase conserved C-terminal domain	Helicase_C	PF00271	915	993	21.2	3.7e-05
g758	Calca_contig_30	SNF2 family N-terminal domain	SNF2_N	PF00176	268	502	42.1	3.8e-11
g758	Calca_contig_30	Helicase conserved C-terminal domain	Helicase_C	PF00271	915	993	23.2	0.00087
g758	Calca_contig_30	SNF2 family N-terminal domain	SNF2_N	PF00176	213	676	-41.8	4.4e-06
g763	Calca_contig_30	Ppx/GppA phosphatase family	Ppx-GppA	PF02541	41	202	44.6	1.5e-12
g763	Calca_contig_30	Ppx/GppA phosphatase family	Ppx-GppA	PF02541	312	366	44.6	1.5e-12
g763	Calca_contig_30	Ppx/GppA phosphatase family	Ppx-GppA	PF02541	41	366	21.7	1e-07
g769	Calca_contig_30	Annexin	Annexin	PF00191	149	214	246.8	9.3e-71
g769	Calca_contig_30	Annexin	Annexin	PF00191	221	276	246.8	9.3e-71
g769	Calca_contig_30	Annexin	Annexin	PF00191	305	369	246.8	9.3e-71
g769	Calca_contig_30	Annexin	Annexin	PF00191	380	397	246.8	9.3e-71
g769	Calca_contig_30	Annexin	Annexin	PF00191	412	448	246.8	9.3e-71
g769	Calca_contig_30	Annexin	Annexin	PF00191	149	214	249.2	1.8e-71
g769	Calca_contig_30	Annexin	Annexin	PF00191	221	286	249.2	1.8e-71
g769	Calca_contig_30	Annexin	Annexin	PF00191	305	371	249.2	1.8e-71
g769	Calca_contig_30	Annexin	Annexin	PF00191	380	448	249.2	1.8e-71
g780	Calca_contig_30	Scytalone dehydratase	Scytalone_dh	PF02982	2	116	224	1.4e-69
g780	Calca_contig_30	Scytalone dehydratase	Scytalone_dh	PF02982	1	116	170.9	6.5e-48
g781	Calca_contig_30	alpha/beta hydrolase fold	Abhydrolase_1	PF00561	103	181	59.5	3.7e-16
g781	Calca_contig_30	alpha/beta hydrolase fold	Abhydrolase_1	PF00561	103	338	48.9	3.5e-11
g783	Calca_contig_30	Adenosine/AMP deaminase	A_deaminase	PF00962	32	61	118	5e-35
g783	Calca_contig_30	Adenosine/AMP deaminase	A_deaminase	PF00962	117	383	118	5e-35
g783	Calca_contig_30	Adenosine/AMP deaminase	A_deaminase	PF00962	32	383	104.2	8.2e-28
g786	Calca_contig_30	TAFII55 protein conserved region	TAFII55_N	PF04658	190	351	155.8	4.3e-44
g786	Calca_contig_30	TAFII55 protein conserved region	TAFII55_N	PF04658	190	351	157.5	7.2e-44
g789	Calca_contig_30	Orotidine 5'-phosphate decarboxylase / HUMPS family	OMPdecase	PF00215	207	244	19.6	8.1e-05
g789	Calca_contig_30	Ribulose-phosphate 3 epimerase family	Ribul_P_3_epim	PF00834	6	235	283.4	2.9e-85
g789	Calca_contig_30	Ribulose-phosphate 3 epimerase family	Ribul_P_3_epim	PF00834	6	235	285.3	2.4e-82
g791	Calca_contig_30	Cytochrome P450	p450	PF00067	53	523	198.3	1.1e-60
g791	Calca_contig_30	Cytochrome P450	p450	PF00067	53	523	200.2	9.8e-57
g794	Calca_contig_30	Mitochondrial ribosomal protein L37	Ribosomal_L37	PF08561	25	68	239.8	8.4e-74
g794	Calca_contig_30	Mitochondrial ribosomal protein L37	Ribosomal_L37	PF08561	695	884	239.8	8.4e-74
g794	Calca_contig_30	Mitochondrial ribosomal protein L37	Ribosomal_L37	PF08561	695	884	252.2	2.3e-72
g795	Calca_contig_30	RNA recognition motif. (a.k.a. RRM, RBD, or RNP domain)	RRM_1	PF00076	234	305	147.2	8.9e-41
g795	Calca_contig_30	RNA recognition motif. (a.k.a. RRM, RBD, or RNP domain)	RRM_1	PF00076	339	405	147.2	8.9e-41
g795	Calca_contig_30	RNA recognition motif. (a.k.a. RRM, RBD, or RNP domain)	RRM_1	PF00076	234	305	149.4	2e-41
g795	Calca_contig_30	RNA recognition motif. (a.k.a. RRM, RBD, or RNP domain)	RRM_1	PF00076	339	411	149.4	2e-41
g798	Calca_contig_32	Ribonucleases P/MRP protein subunit POP1	POP1	PF06978	64	122	54.3	2.9e-15
g798	Calca_contig_32	Ribonucleases P/MRP protein subunit POP1	POP1	PF06978	211	265	54.3	2.9e-15
g798	Calca_contig_32	Ribonucleases P/MRP protein subunit POP1	POP1	PF06978	64	289	-1.3	6e-05
g801	Calca_contig_32	Hsp70 protein	HSP70	PF00012	18	91	155.1	3.8e-43
g801	Calca_contig_32	Hsp70 protein	HSP70	PF00012	145	356	155.1	3.8e-43
g801	Calca_contig_32	Hsp70 protein	HSP70	PF00012	18	565	0.5	1.4e-13
g803	Calca_contig_32	Zinc finger, C2H2 type	zf-C2H2	PF00096	489	513	51.1	7.8e-12
g803	Calca_contig_32	Zinc finger, C2H2 type	zf-C2H2	PF00096	517	542	51.1	7.8e-12
g803	Calca_contig_32	Zinc finger, C2H2 type	zf-C2H2	PF00096	548	579	51.1	7.8e-12
g803	Calca_contig_32	Zinc finger, C2H2 type	zf-C2H2	PF00096	489	513	57.1	1.2e-13
g803	Calca_contig_32	Zinc finger, C2H2 type	zf-C2H2	PF00096	517	542	57.1	1.2e-13
g803	Calca_contig_32	Zinc finger, C2H2 type	zf-C2H2	PF00096	548	579	57.1	1.2e-13
g805	Calca_contig_32	C-5 cytosine-specific DNA methylase	DNA_methylase	PF00145	309	473	103.9	6.1e-28
g805	Calca_contig_32	C-5 cytosine-specific DNA methylase	DNA_methylase	PF00145	550	602	103.9	6.1e-28
g805	Calca_contig_32	C-5 cytosine-specific DNA methylase	DNA_methylase	PF00145	309	602	80.4	1.1e-20
g809	Calca_contig_32	BRCA1 C Terminus (BRCT) domain	BRCT	PF00533	163	238	51.4	6.9e-14
g809	Calca_contig_32	Fibronectin type III domain	fn3	PF00041	76	156	29.1	2.8e-07
g809	Calca_contig_32	BRCA1 C Terminus (BRCT) domain	BRCT	PF00533	163	238	53.2	1.8e-12
g809	Calca_contig_32	Fibronectin type III domain	fn3	PF00041	76	156	31	8.8e-06
g810	Calca_contig_32	PQ loop repeat	PQ-loop	PF04193	3	63	56.1	6.9e-15
g810	Calca_contig_32	PQ loop repeat	PQ-loop	PF04193	143	185	56.1	6.9e-15
g810	Calca_contig_32	PQ loop repeat	PQ-loop	PF04193	3	63	54.4	8.1e-13
g810	Calca_contig_32	PQ loop repeat	PQ-loop	PF04193	127	185	54.4	8.1e-13
g811	Calca_contig_32	Homeobox domain	Homeobox	PF00046	154	189	26.7	2e-05
g811	Calca_contig_32	Homeobox domain	Homeobox	PF00046	133	189	18.3	0.00035
g813	Calca_contig_32	Translation initiation factor 1A / IF-1	eIF-1a	PF01176	30	94	116.9	1.2e-31
g813	Calca_contig_32	Translation initiation factor 1A / IF-1	eIF-1a	PF01176	30	94	118.8	3.2e-32
g814	Calca_contig_32	WH1 domain	WH1	PF00568	14	132	114.3	7.4e-31
g814	Calca_contig_32	WH1 domain	WH1	PF00568	14	132	116.2	1.9e-31
g817	Calca_contig_32	ERCC4 domain	ERCC4	PF02732	711	791	127.4	8.3e-35
g817	Calca_contig_32	ERCC4 domain	ERCC4	PF02732	711	791	129.2	2.4e-35
g820	Calca_contig_32	CorA-like Mg2+ transporter protein	CorA	PF01544	519	822	179.1	5e-59
g820	Calca_contig_32	CorA-like Mg2+ transporter protein	CorA	PF01544	519	835	177.8	5.5e-50
g822	Calca_contig_32	Cyclin	Cyclin	PF08613	161	268	48.9	1.4e-14
g822	Calca_contig_32	Cyclin	Cyclin	PF08613	130	268	30.9	1.3e-07
g825	Calca_contig_32	Lyase	Lyase_1	PF00206	90	423	557.8	2.2e-164
g825	Calca_contig_32	Lyase	Lyase_1	PF00206	90	423	559.8	5.7e-165
g826	Calca_contig_32	DEAD/DEAH box helicase	DEAD	PF00270	114	285	173.3	1.3e-48
g826	Calca_contig_32	Helicase conserved C-terminal domain	Helicase_C	PF00271	353	429	109.2	1.3e-30
g826	Calca_contig_32	DEAD/DEAH box helicase	DEAD	PF00270	114	285	175.1	3.6e-49
g826	Calca_contig_32	Helicase conserved C-terminal domain	Helicase_C	PF00271	353	429	111.2	6.4e-30
g829	Calca_contig_32	RNAse P Rpr2/Rpp21/SNM1 subunit domain	Rpr2	PF04032	17	136	73.2	2.6e-22
g829	Calca_contig_32	RNAse P Rpr2/Rpp21/SNM1 subunit domain	Rpr2	PF04032	17	136	75.2	4.4e-19
g830	Calca_contig_32	Ketopantoate reductase PanE/ApbA	ApbA	PF02558	10	168	92.8	3.5e-26
g830	Calca_contig_32	Ketopantoate reductase PanE/ApbA C terminal	ApbA_C	PF08546	237	324	32.7	4.6e-08
g830	Calca_contig_32	Ketopantoate reductase PanE/ApbA	ApbA	PF02558	10	168	94.7	5.7e-25
g830	Calca_contig_32	Ketopantoate reductase PanE/ApbA C terminal	ApbA_C	PF08546	200	324	32.6	4.1e-07
g834	Calca_contig_32	OPT oligopeptide transporter protein	OPT	PF03169	99	756	833	3.2e-247
g834	Calca_contig_32	OPT oligopeptide transporter protein	OPT	PF03169	99	756	834.9	8.9e-248
g835	Calca_contig_32	Ribosomal protein L37e	Ribosomal_L37e	PF01907	2	55	118.3	6.9e-33
g835	Calca_contig_32	Ribosomal protein L37e	Ribosomal_L37e	PF01907	2	55	120.3	1.1e-32
g837	Calca_contig_32	Major Facilitator Superfamily	MFS_1	PF07690	173	776	141.7	4e-39
g837	Calca_contig_32	Major Facilitator Superfamily	MFS_1	PF07690	173	776	143.7	1.1e-39
g839	Calca_contig_32	haloacid dehalogenase-like hydrolase	Hydrolase	PF00702	2	206	55	4.5e-15
g839	Calca_contig_32	haloacid dehalogenase-like hydrolase	Hydrolase	PF00702	2	206	57	1.3e-13
g842	Calca_contig_32	Sel1 repeat	Sel1	PF08238	665	701	152.9	1.4e-43
g842	Calca_contig_32	Sel1 repeat	Sel1	PF08238	702	741	152.9	1.4e-43
g842	Calca_contig_32	Sel1 repeat	Sel1	PF08238	742	778	152.9	1.4e-43
g842	Calca_contig_32	Sel1 repeat	Sel1	PF08238	782	820	152.9	1.4e-43
g842	Calca_contig_32	Sel1 repeat	Sel1	PF08238	821	857	152.9	1.4e-43
g842	Calca_contig_32	Sel1 repeat	Sel1	PF08238	858	895	152.9	1.4e-43
g842	Calca_contig_32	Sel1 repeat	Sel1	PF08238	896	931	152.9	1.4e-43
g842	Calca_contig_32	Sel1 repeat	Sel1	PF08238	665	701	164.5	5.8e-46
g842	Calca_contig_32	Sel1 repeat	Sel1	PF08238	702	741	164.5	5.8e-46
g842	Calca_contig_32	Sel1 repeat	Sel1	PF08238	742	778	164.5	5.8e-46
g842	Calca_contig_32	Sel1 repeat	Sel1	PF08238	782	820	164.5	5.8e-46
g842	Calca_contig_32	Sel1 repeat	Sel1	PF08238	821	857	164.5	5.8e-46
g842	Calca_contig_32	Sel1 repeat	Sel1	PF08238	858	895	164.5	5.8e-46
g842	Calca_contig_32	Sel1 repeat	Sel1	PF08238	896	931	164.5	5.8e-46
g844	Calca_contig_32	CBP4	CBP4	PF07960	5	81	125.9	2.4e-34
g844	Calca_contig_32	CBP4	CBP4	PF07960	5	116	114.1	8.6e-31
g846	Calca_contig_32	OPT oligopeptide transporter protein	OPT	PF03169	94	748	780.6	2e-231
g846	Calca_contig_32	OPT oligopeptide transporter protein	OPT	PF03169	94	748	782.4	5.4e-232
g847	Calca_contig_32	NAC domain	NAC	PF01849	65	124	97.6	7.5e-26
g847	Calca_contig_32	NAC domain	NAC	PF01849	65	124	99.6	1.9e-26
g848	Calca_contig_32	Adenosine-deaminase (editase) domain	A_deamin	PF02137	53	91	18	5.9e-05
g848	Calca_contig_32	Adenosine-deaminase (editase) domain	A_deamin	PF02137	123	144	18	5.9e-05
g848	Calca_contig_32	Adenosine-deaminase (editase) domain	A_deamin	PF02137	53	390	-117	5.2e-05
g849	Calca_contig_32	Ribosomal protein L24e	Ribosomal_L24e	PF01246	1	71	137.6	6.6e-40
g849	Calca_contig_32	Ribosomal protein L24e	Ribosomal_L24e	PF01246	1	71	139.6	1.7e-38
g850	Calca_contig_32	AhpC/TSA family	AhpC-TSA	PF00578	40	104	35.7	1.5e-10
g850	Calca_contig_32	Redoxin	Redoxin	PF08534	5	166	208.1	4.4e-59
g850	Calca_contig_32	AhpC/TSA family	AhpC-TSA	PF00578	6	145	25.4	2.6e-05
g850	Calca_contig_32	Redoxin	Redoxin	PF08534	5	166	209.9	1.2e-59
g851	Calca_contig_33	Mitochondrial carrier protein	Mito_carr	PF00153	10	104	297.2	1.2e-86
g851	Calca_contig_33	Mitochondrial carrier protein	Mito_carr	PF00153	113	206	297.2	1.2e-86
g851	Calca_contig_33	Mitochondrial carrier protein	Mito_carr	PF00153	216	309	297.2	1.2e-86
g851	Calca_contig_33	Mitochondrial carrier protein	Mito_carr	PF00153	10	104	303	1.1e-87
g851	Calca_contig_33	Mitochondrial carrier protein	Mito_carr	PF00153	113	206	303	1.1e-87
g851	Calca_contig_33	Mitochondrial carrier protein	Mito_carr	PF00153	216	309	303	1.1e-87
g852	Calca_contig_33	Malate/L-lactate dehydrogenase	Ldh_2	PF02615	5	342	286.8	8.5e-83
g852	Calca_contig_33	Malate/L-lactate dehydrogenase	Ldh_2	PF02615	5	342	288.8	2.2e-83
g853	Calca_contig_33	D-isomer specific 2-hydroxyacid dehydrogenase, catalytic domain	2-Hacid_dh	PF00389	45	321	84.2	1.9e-23
g853	Calca_contig_33	D-isomer specific 2-hydroxyacid dehydrogenase, NAD binding domain	2-Hacid_dh_C	PF02826	109	289	249.9	1.1e-71
g853	Calca_contig_33	D-isomer specific 2-hydroxyacid dehydrogenase, catalytic domain	2-Hacid_dh	PF00389	9	321	79.1	3e-20
g853	Calca_contig_33	D-isomer specific 2-hydroxyacid dehydrogenase, NAD binding domain	2-Hacid_dh_C	PF02826	109	289	251.8	2.9e-72
g854	Calca_contig_33	Major Facilitator Superfamily	MFS_1	PF07690	51	263	139.5	1.9e-38
g854	Calca_contig_33	Major Facilitator Superfamily	MFS_1	PF07690	264	451	139.5	1.9e-38
g854	Calca_contig_33	Sugar (and other) transporter	Sugar_tr	PF00083	98	173	20.8	1.9e-05
g854	Calca_contig_33	Sugar (and other) transporter	Sugar_tr	PF00083	356	415	20.8	1.9e-05
g854	Calca_contig_33	Fungal trichothecene efflux pump (TRI12)	TRI12	PF06609	182	302	17.6	5.5e-05
g854	Calca_contig_33	Major Facilitator Superfamily	MFS_1	PF07690	51	451	141.4	5.1e-39
g856	Calca_contig_33	Glutathione S-transferase, C-terminal domain	GST_C	PF00043	115	210	21	3.4e-05
g856	Calca_contig_33	Glutathione S-transferase, N-terminal domain	GST_N	PF02798	7	79	37.5	6.9e-09
g856	Calca_contig_33	Glutathione S-transferase, C-terminal domain	GST_C	PF00043	115	210	22.9	0.00078
g856	Calca_contig_33	Glutathione S-transferase, N-terminal domain	GST_N	PF02798	7	79	39.3	2.8e-08
g857	Calca_contig_33	Glycosyl hydrolases family 31	Glyco_hydro_31	PF01055	245	885	625.2	1.1e-184
g857	Calca_contig_33	Glycosyl hydrolases family 31	Glyco_hydro_31	PF01055	245	885	627	3.3e-185
g858	Calca_contig_33	Oxidoreductase family, NAD-binding Rossmann fold	GFO_IDH_MocA	PF01408	61	156	92	1e-24
g858	Calca_contig_33	Oxidoreductase family, NAD-binding Rossmann fold	GFO_IDH_MocA	PF01408	34	156	89.6	2e-23
g859	Calca_contig_33	POT family	PTR2	PF00854	166	240	77.3	1.4e-21
g859	Calca_contig_33	POT family	PTR2	PF00854	256	323	77.3	1.4e-21
g859	Calca_contig_33	POT family	PTR2	PF00854	354	535	77.3	1.4e-21
g859	Calca_contig_33	POT family	PTR2	PF00854	166	535	71.2	6.7e-18
g861	Calca_contig_33	Heterokaryon incompatibility protein (HET)	HET	PF06985	84	230	104.3	2.8e-35
g861	Calca_contig_33	Heterokaryon incompatibility protein (HET)	HET	PF06985	84	230	106.1	2.2e-28
g862	Calca_contig_33	Tetratricopeptide repeat	TPR_1	PF00515	83	106	101	2.3e-27
g862	Calca_contig_33	Tetratricopeptide repeat	TPR_1	PF00515	127	160	101	2.3e-27
g862	Calca_contig_33	Tetratricopeptide repeat	TPR_1	PF00515	347	364	101	2.3e-27
g862	Calca_contig_33	Tetratricopeptide repeat	TPR_1	PF00515	451	484	101	2.3e-27
g862	Calca_contig_33	Tetratricopeptide repeat	TPR_1	PF00515	485	518	101	2.3e-27
g862	Calca_contig_33	Tetratricopeptide repeat	TPR_1	PF00515	519	552	101	2.3e-27
g862	Calca_contig_33	Tetratricopeptide repeat	TPR_1	PF00515	553	586	101	2.3e-27
g862	Calca_contig_33	Tetratricopeptide repeat	TPR_1	PF00515	623	658	101	2.3e-27
g862	Calca_contig_33	Tetratricopeptide repeat	TPR_2	PF07719	43	65	102.3	2.7e-27
g862	Calca_contig_33	Tetratricopeptide repeat	TPR_2	PF07719	83	109	102.3	2.7e-27
g862	Calca_contig_33	Tetratricopeptide repeat	TPR_2	PF07719	127	157	102.3	2.7e-27
g862	Calca_contig_33	Tetratricopeptide repeat	TPR_2	PF07719	347	364	102.3	2.7e-27
g862	Calca_contig_33	Tetratricopeptide repeat	TPR_2	PF07719	451	484	102.3	2.7e-27
g862	Calca_contig_33	Tetratricopeptide repeat	TPR_2	PF07719	485	518	102.3	2.7e-27
g862	Calca_contig_33	Tetratricopeptide repeat	TPR_2	PF07719	519	552	102.3	2.7e-27
g862	Calca_contig_33	Tetratricopeptide repeat	TPR_2	PF07719	553	586	102.3	2.7e-27
g862	Calca_contig_33	Tetratricopeptide repeat	TPR_2	PF07719	589	622	102.3	2.7e-27
g862	Calca_contig_33	Tetratricopeptide repeat	TPR_2	PF07719	623	658	102.3	2.7e-27
g862	Calca_contig_33	Tetratricopeptide repeat	TPR_1	PF00515	127	160	113.5	1.3e-30
g862	Calca_contig_33	Tetratricopeptide repeat	TPR_1	PF00515	451	484	113.5	1.3e-30
g862	Calca_contig_33	Tetratricopeptide repeat	TPR_1	PF00515	485	518	113.5	1.3e-30
g862	Calca_contig_33	Tetratricopeptide repeat	TPR_1	PF00515	519	552	113.5	1.3e-30
g862	Calca_contig_33	Tetratricopeptide repeat	TPR_1	PF00515	553	586	113.5	1.3e-30
g862	Calca_contig_33	Tetratricopeptide repeat	TPR_1	PF00515	623	658	113.5	1.3e-30
g862	Calca_contig_33	Tetratricopeptide repeat	TPR_2	PF07719	76	109	115.3	3.7e-31
g862	Calca_contig_33	Tetratricopeptide repeat	TPR_2	PF07719	127	160	115.3	3.7e-31
g862	Calca_contig_33	Tetratricopeptide repeat	TPR_2	PF07719	451	484	115.3	3.7e-31
g862	Calca_contig_33	Tetratricopeptide repeat	TPR_2	PF07719	485	518	115.3	3.7e-31
g862	Calca_contig_33	Tetratricopeptide repeat	TPR_2	PF07719	519	552	115.3	3.7e-31
g862	Calca_contig_33	Tetratricopeptide repeat	TPR_2	PF07719	553	586	115.3	3.7e-31
g862	Calca_contig_33	Tetratricopeptide repeat	TPR_2	PF07719	589	622	115.3	3.7e-31
g862	Calca_contig_33	Tetratricopeptide repeat	TPR_2	PF07719	623	658	115.3	3.7e-31
g863	Calca_contig_33	Berberine and berberine like	BBE	PF08031	436	478	28.5	4.6e-07
g863	Calca_contig_33	FAD binding domain	FAD_binding_4	PF01565	61	197	79	2.4e-21
g863	Calca_contig_33	Berberine and berberine like	BBE	PF08031	436	478	30.3	1.4e-05
g863	Calca_contig_33	FAD binding domain	FAD_binding_4	PF01565	61	197	81	7.9e-21
g866	Calca_contig_34	Actin	Actin	PF00022	1	49	104.7	1.7e-32
g866	Calca_contig_34	Actin	Actin	PF00022	56	164	104.7	1.7e-32
g866	Calca_contig_34	Actin	Actin	PF00022	1	196	-129.9	2.5e-07
g868	Calca_contig_34	NmrA-like family	NmrA	PF05368	10	136	24.7	1.4e-06
g868	Calca_contig_34	NmrA-like family	NmrA	PF05368	10	199	-41.3	1e-05
g869	Calca_contig_34	Xylose isomerase-like TIM barrel	AP_endonuc_2	PF01261	31	201	55.5	4.7e-15
g869	Calca_contig_34	Xylose isomerase-like TIM barrel	AP_endonuc_2	PF01261	31	290	48	6.6e-11
g870	Calca_contig_34	short chain dehydrogenase	adh_short	PF00106	10	150	49.4	6.1e-13
g870	Calca_contig_34	Shikimate / quinate 5-dehydrogenase	Shikimate_DH	PF01488	17	47	21	6.4e-05
g870	Calca_contig_34	short chain dehydrogenase	adh_short	PF00106	10	176	48	6.5e-11
g875	Calca_contig_34	FAD dependent oxidoreductase	DAO	PF01266	45	76	27.2	3.8e-07
g875	Calca_contig_34	FAD dependent oxidoreductase	DAO	PF01266	205	212	27.2	3.8e-07
g875	Calca_contig_34	Pyridine nucleotide-disulphide oxidoreductase	Pyr_redox	PF00070	45	56	20.7	3.4e-05
g875	Calca_contig_34	Pyridine nucleotide-disulphide oxidoreductase	Pyr_redox	PF00070	205	238	20.7	3.4e-05
g875	Calca_contig_34	Pyridine nucleotide-disulphide oxidoreductase	Pyr_redox	PF00070	340	353	20.7	3.4e-05
g882	Calca_contig_34	PPIC-type PPIASE domain	Rotamase	PF00639	73	89	103.5	4.8e-29
g882	Calca_contig_34	PPIC-type PPIASE domain	Rotamase	PF00639	120	213	103.5	4.8e-29
g882	Calca_contig_34	WW domain	WW	PF00397	6	36	42.9	2.6e-12
g882	Calca_contig_34	PPIC-type PPIASE domain	Rotamase	PF00639	73	213	82.3	3.2e-21
g882	Calca_contig_34	WW domain	WW	PF00397	6	36	44.9	5.9e-10
g883	Calca_contig_34	RNA polymerases M/15 Kd subunit	RNA_POL_M_15KD	PF02150	24	78	55.7	3.6e-14
g883	Calca_contig_34	RNA polymerases M/15 Kd subunit	RNA_POL_M_15KD	PF02150	24	78	57.6	8.6e-14
g885	Calca_contig_34	Ribosomal protein L14p/L23e	Ribosomal_L14	PF00238	50	180	154.6	5.5e-43
g885	Calca_contig_34	Ribosomal protein L14p/L23e	Ribosomal_L14	PF00238	50	180	156.5	1.4e-43
g886	Calca_contig_34	DEAD/DEAH box helicase	DEAD	PF00270	101	280	193.8	8.7e-55
g886	Calca_contig_34	Helicase conserved C-terminal domain	Helicase_C	PF00271	365	433	87.6	2.3e-24
g886	Calca_contig_34	DEAD/DEAH box helicase	DEAD	PF00270	101	280	195.6	2.5e-55
g886	Calca_contig_34	Helicase conserved C-terminal domain	Helicase_C	PF00271	359	433	86.8	1.3e-22
g888	Calca_contig_34	SET domain	SET	PF00856	190	237	37.5	5.6e-10
g888	Calca_contig_34	SET domain	SET	PF00856	114	237	21.4	4.8e-05
g892	Calca_contig_34	Heterokaryon incompatibility protein (HET)	HET	PF06985	369	462	77.6	3.2e-26
g892	Calca_contig_34	Heterokaryon incompatibility protein (HET)	HET	PF06985	499	511	77.6	3.2e-26
g892	Calca_contig_34	Heterokaryon incompatibility protein (HET)	HET	PF06985	369	511	79.4	2.3e-20
g893	Calca_contig_34	PA domain	PA	PF02225	153	252	54.9	5.1e-14
g893	Calca_contig_34	Peptidase family M20/M25/M40	Peptidase_M20	PF01546	290	349	15.9	0.00056
g893	Calca_contig_34	Peptidase family M28	Peptidase_M28	PF04389	287	476	160.8	9.3e-47
g893	Calca_contig_34	PA domain	PA	PF02225	153	252	56.8	1.5e-13
g893	Calca_contig_34	Peptidase family M28	Peptidase_M28	PF04389	287	476	162.7	2e-45
g894	Calca_contig_34	Major Facilitator Superfamily	MFS_1	PF07690	73	455	166.4	1.5e-46
g894	Calca_contig_34	Sugar (and other) transporter	Sugar_tr	PF00083	99	177	22.7	5.4e-06
g894	Calca_contig_34	Major Facilitator Superfamily	MFS_1	PF07690	73	455	168.3	3.9e-47
g894	Calca_contig_34	Sugar (and other) transporter	Sugar_tr	PF00083	69	500	-87.2	2.8e-05
g895	Calca_contig_34	Cupin domain	Cupin_2	PF07883	36	109	34.5	1.5e-09
g895	Calca_contig_34	Cupin domain	Cupin_2	PF07883	36	109	36.4	2e-07
g897	Calca_contig_34	Zinc-binding dehydrogenase	ADH_zinc_N	PF00107	159	251	67	1e-18
g897	Calca_contig_34	Zinc-binding dehydrogenase	ADH_zinc_N	PF00107	159	322	62.5	2.8e-15
g899	Calca_contig_34	Beta-lactamase	Beta-lactamase	PF00144	93	417	105.5	3.2e-28
g899	Calca_contig_34	Beta-lactamase	Beta-lactamase	PF00144	41	417	97.4	8.7e-26
g901	Calca_contig_34	Methyltransferase domain	Methyltransf_11	PF08241	52	76	21.6	7.9e-05
g901	Calca_contig_34	Methyltransferase domain	Methyltransf_11	PF08241	94	128	21.6	7.9e-05
g901	Calca_contig_34	Methyltransferase domain	Methyltransf_12	PF08242	52	77	29	8.7e-07
g901	Calca_contig_34	Methyltransferase domain	Methyltransf_12	PF08242	94	126	29	8.7e-07
g901	Calca_contig_34	Methyltransferase domain	Methyltransf_12	PF08242	52	126	24.5	0.00081
g902	Calca_contig_34	Phosphotransferase enzyme family	APH	PF01636	141	341	50.7	4.8e-14
g902	Calca_contig_34	Phosphotransferase enzyme family	APH	PF01636	98	394	41.7	5.4e-09
g909	Calca_contig_34	CFEM domain	CFEM	PF05730	28	94	37.1	9.4e-09
g909	Calca_contig_34	CFEM domain	CFEM	PF05730	171	237	37.1	9.4e-09
g909	Calca_contig_34	CFEM domain	CFEM	PF05730	293	359	37.1	9.4e-09
g909	Calca_contig_34	CFEM domain	CFEM	PF05730	408	475	37.1	9.4e-09
g909	Calca_contig_34	CFEM domain	CFEM	PF05730	532	599	37.1	9.4e-09
g909	Calca_contig_34	CFEM domain	CFEM	PF05730	28	94	46.2	2.2e-10
g909	Calca_contig_34	CFEM domain	CFEM	PF05730	171	237	46.2	2.2e-10
g909	Calca_contig_34	CFEM domain	CFEM	PF05730	293	359	46.2	2.2e-10
g909	Calca_contig_34	CFEM domain	CFEM	PF05730	408	475	46.2	2.2e-10
g909	Calca_contig_34	CFEM domain	CFEM	PF05730	532	599	46.2	2.2e-10
g910	Calca_contig_34	Thioesterase superfamily	4HBT	PF03061	67	145	47.5	4.5e-12
g910	Calca_contig_34	Thioesterase superfamily	4HBT	PF03061	67	145	49.5	2.3e-11
g911	Calca_contig_34	Fungal specific transcription factor domain	Fungal_trans	PF04082	388	486	89.1	5.5e-26
g911	Calca_contig_34	Fungal specific transcription factor domain	Fungal_trans	PF04082	388	486	91	7.6e-24
g912	Calca_contig_34	Malate/L-lactate dehydrogenase	Ldh_2	PF02615	10	345	400.4	5.6e-117
g912	Calca_contig_34	Malate/L-lactate dehydrogenase	Ldh_2	PF02615	10	345	402.3	1.4e-117
g913	Calca_contig_34	Stress responsive A/B Barrel Domain	Dabb	PF07876	3	103	45.6	1.2e-11
g913	Calca_contig_34	Stress responsive A/B Barrel Domain	Dabb	PF07876	3	103	47.5	9.3e-11
g915	Calca_contig_34	High-affinity nickel-transport protein	NicO	PF03824	1	40	254.5	4.4e-73
g915	Calca_contig_34	High-affinity nickel-transport protein	NicO	PF03824	47	350	254.5	4.4e-73
g915	Calca_contig_34	High-affinity nickel-transport protein	NicO	PF03824	47	350	255.1	2.9e-73
g917	Calca_contig_34	Calpain family cysteine protease	Peptidase_C2	PF00648	175	188	129.8	8.5e-36
g917	Calca_contig_34	Calpain family cysteine protease	Peptidase_C2	PF00648	212	233	129.8	8.5e-36
g917	Calca_contig_34	Calpain family cysteine protease	Peptidase_C2	PF00648	269	320	129.8	8.5e-36
g917	Calca_contig_34	Calpain family cysteine protease	Peptidase_C2	PF00648	346	441	129.8	8.5e-36
g917	Calca_contig_34	Calpain family cysteine protease	Peptidase_C2	PF00648	135	449	100.1	1.3e-26
g918	Calca_contig_34	Protein of unknown function, DUF580	DUF580	PF04515	228	578	249.7	8.3e-72
g918	Calca_contig_34	Major Facilitator Superfamily	MFS_1	PF07690	75	284	17.3	0.00032
g918	Calca_contig_34	Protein of unknown function, DUF580	DUF580	PF04515	228	578	251.6	3.4e-72
g919	Calca_contig_34	Autophagy protein Apg17	APG17	PF04108	390	463	36.1	1.7e-12
g921	Calca_contig_34	Amino acid permease	AA_permease	PF00324	49	511	561.4	1.8e-165
g921	Calca_contig_34	Amino acid permease	AA_permease	PF00324	49	511	563.3	4.9e-166
g923	Calca_contig_34	RNA dependent RNA polymerase	RdRP	PF05183	564	600	80.9	2.3e-22
g923	Calca_contig_34	RNA dependent RNA polymerase	RdRP	PF05183	733	865	80.9	2.3e-22
g923	Calca_contig_34	RNA dependent RNA polymerase	RdRP	PF05183	548	974	5.3	2.6e-13
g925	Calca_contig_34	Fungal specific transcription factor domain	Fungal_trans	PF04082	289	392	62	7e-18
g925	Calca_contig_34	Fungal Zn(2)-Cys(6) binuclear cluster domain	Zn_clus	PF00172	35	75	37.8	3.7e-11
g925	Calca_contig_34	Fungal specific transcription factor domain	Fungal_trans	PF04082	289	392	64	1e-15
g925	Calca_contig_34	Fungal Zn(2)-Cys(6) binuclear cluster domain	Zn_clus	PF00172	35	75	39.7	2e-08
g926	Calca_contig_34	RIO1 family	RIO1	PF01163	181	379	342.4	4.1e-107
g926	Calca_contig_34	RIO1 family	RIO1	PF01163	181	379	344.4	4e-100
g928	Calca_contig_34	Eukaryotic aspartyl protease	Asp	PF00026	108	422	203	1.4e-57
g928	Calca_contig_34	Eukaryotic aspartyl protease	Asp	PF00026	108	422	204.9	3.8e-58
g929	Calca_contig_34	NmrA-like family	NmrA	PF05368	26	79	17.3	0.00018
g929	Calca_contig_34	NmrA-like family	NmrA	PF05368	214	250	17.3	0.00018
g929	Calca_contig_34	NmrA-like family	NmrA	PF05368	26	261	4.6	1.9e-08
g930	Calca_contig_34	Flavin containing amine oxidoreductase	Amino_oxidase	PF01593	12	38	22.4	6.9e-06
g930	Calca_contig_34	FAD dependent oxidoreductase	DAO	PF01266	4	39	32.4	1.3e-08
g930	Calca_contig_34	FAD binding domain	FAD_binding_2	PF00890	4	28	20.8	1e-05
g930	Calca_contig_34	FAD binding domain	FAD_binding_3	PF01494	2	25	30.8	7.8e-09
g930	Calca_contig_34	FAD binding domain	FAD_binding_3	PF01494	156	176	30.8	7.8e-09
g930	Calca_contig_34	FAD binding domain	FAD_binding_3	PF01494	292	323	30.8	7.8e-09
g930	Calca_contig_34	Pyridine nucleotide-disulphide oxidoreductase	Pyr_redox	PF00070	4	32	19.4	8.7e-05
g930	Calca_contig_34	Pyridine nucleotide-disulphide oxidoreductase	Pyr_redox	PF00070	127	167	19.4	8.7e-05
g930	Calca_contig_34	Pyridine nucleotide-disulphide oxidoreductase	Pyr_redox_2	PF07992	4	32	26.1	2.4e-06
g930	Calca_contig_34	Pyridine nucleotide-disulphide oxidoreductase	Pyr_redox_2	PF07992	121	160	26.1	2.4e-06
g930	Calca_contig_34	Tryptophan halogenase	Trp_halogenase	PF04820	4	30	14.7	0.00071
g930	Calca_contig_34	FAD dependent oxidoreductase	DAO	PF01266	4	264	-19.4	0.00041
g930	Calca_contig_34	FAD binding domain	FAD_binding_3	PF01494	2	353	-57.7	3.3e-08
g931	Calca_contig_34	Major Facilitator Superfamily	MFS_1	PF07690	63	448	147.8	6.2e-41
g931	Calca_contig_34	Major Facilitator Superfamily	MFS_1	PF07690	63	448	149.7	1.7e-41
g931	Calca_contig_34	Sugar (and other) transporter	Sugar_tr	PF00083	66	498	-116.9	0.00041
g934	Calca_contig_34	Ankyrin repeat	Ank	PF00023	268	293	103.1	1.5e-27
g934	Calca_contig_34	Ankyrin repeat	Ank	PF00023	303	337	103.1	1.5e-27
g934	Calca_contig_34	Ankyrin repeat	Ank	PF00023	340	368	103.1	1.5e-27
g934	Calca_contig_34	Ankyrin repeat	Ank	PF00023	375	407	103.1	1.5e-27
g934	Calca_contig_34	Ankyrin repeat	Ank	PF00023	409	447	103.1	1.5e-27
g934	Calca_contig_34	Ankyrin repeat	Ank	PF00023		505	103.1	1.5e-27
g934	Calca_contig_34	Ankyrin repeat	Ank	PF00023	535	552	103.1	1.5e-27
g934	Calca_contig_34	Ankyrin repeat	Ank	PF00023	560	595	103.1	1.5e-27
g934	Calca_contig_34	Ankyrin repeat	Ank	PF00023	619	638	103.1	1.5e-27
g934	Calca_contig_34	Ankyrin repeat	Ank	PF00023	643	666	103.1	1.5e-27
g934	Calca_contig_34	Ankyrin repeat	Ank	PF00023	62	142	113.6	1.2e-30
g934	Calca_contig_34	Ankyrin repeat	Ank	PF00023	268	300	113.6	1.2e-30
g934	Calca_contig_34	Ankyrin repeat	Ank	PF00023	301	337	113.6	1.2e-30
g934	Calca_contig_34	Ankyrin repeat	Ank	PF00023	340	372	113.6	1.2e-30
g934	Calca_contig_34	Ankyrin repeat	Ank	PF00023	375	407	113.6	1.2e-30
g934	Calca_contig_34	Ankyrin repeat	Ank	PF00023	409	447	113.6	1.2e-30
g934	Calca_contig_34	Ankyrin repeat	Ank	PF00023	450	505	113.6	1.2e-30
g934	Calca_contig_34	Ankyrin repeat	Ank	PF00023	515	552	113.6	1.2e-30
g934	Calca_contig_34	Ankyrin repeat	Ank	PF00023	560	595	113.6	1.2e-30
g934	Calca_contig_34	Ankyrin repeat	Ank	PF00023	604	638	113.6	1.2e-30
g937	Calca_contig_34	Tetratricopeptide repeat	TPR_1	PF00515	548	568	25	9.4e-06
g937	Calca_contig_34	Tetratricopeptide repeat	TPR_1	PF00515	648	674	25	9.4e-06
g937	Calca_contig_34	Tetratricopeptide repeat	TPR_1	PF00515	739	753	25	9.4e-06
g937	Calca_contig_34	Tetratricopeptide repeat	TPR_1	PF00515	776	805	25	9.4e-06
g937	Calca_contig_34	Tetratricopeptide repeat	TPR_1	PF00515	818	851	25	9.4e-06
g937	Calca_contig_34	Tetratricopeptide repeat	TPR_1	PF00515	860	888	25	9.4e-06
g937	Calca_contig_34	Tetratricopeptide repeat	TPR_2	PF07719	548	568	35.1	1.8e-08
g937	Calca_contig_34	Tetratricopeptide repeat	TPR_2	PF07719	606	639	35.1	1.8e-08
g937	Calca_contig_34	Tetratricopeptide repeat	TPR_2	PF07719	648	674	35.1	1.8e-08
g937	Calca_contig_34	Tetratricopeptide repeat	TPR_2	PF07719	739	767	35.1	1.8e-08
g937	Calca_contig_34	Tetratricopeptide repeat	TPR_2	PF07719	776	809	35.1	1.8e-08
g937	Calca_contig_34	Tetratricopeptide repeat	TPR_2	PF07719	818	851	35.1	1.8e-08
g937	Calca_contig_34	Tetratricopeptide repeat	TPR_2	PF07719	860	888	35.1	1.8e-08
g937	Calca_contig_34	Tetratricopeptide repeat	TPR_2	PF07719	606	639	44.8	6.1e-10
g937	Calca_contig_34	Tetratricopeptide repeat	TPR_2	PF07719	648	681	44.8	6.1e-10
g937	Calca_contig_34	Tetratricopeptide repeat	TPR_2	PF07719	734	767	44.8	6.1e-10
g937	Calca_contig_34	Tetratricopeptide repeat	TPR_2	PF07719	776	809	44.8	6.1e-10
g937	Calca_contig_34	Tetratricopeptide repeat	TPR_2	PF07719	818	851	44.8	6.1e-10
g937	Calca_contig_34	Tetratricopeptide repeat	TPR_2	PF07719	860	893	44.8	6.1e-10
g941	Calca_contig_34	Alpha-L-arabinofuranosidase C-terminus	Alpha-L-AF_C	PF06964	440	585	45.4	4.6e-11
g941	Calca_contig_34	Alpha-L-arabinofuranosidase C-terminus	Alpha-L-AF_C	PF06964	440	619	42.2	1.9e-11
g944	Calca_contig_34	ATPase family associated with various cellular activities (AAA)	AAA	PF00004	253	391	51.9	3e-15
g944	Calca_contig_34	ATPase family associated with various cellular activities (AAA)	AAA	PF00004	253	421	44.8	6e-10
g945	Calca_contig_34	Aldo/keto reductase family	Aldo_ket_red	PF00248	9	311	362.3	1.6e-105
g945	Calca_contig_34	Aldo/keto reductase family	Aldo_ket_red	PF00248	9	311	364.1	4.5e-106
g947	Calca_contig_34	Poly A polymerase head domain	PolyA_pol	PF01743	22	87	51.2	1.3e-13
g947	Calca_contig_34	Poly A polymerase head domain	PolyA_pol	PF01743	1	87	-10.2	3.6e-05
g948	Calca_contig_34	Major Facilitator Superfamily	MFS_1	PF07690	18	429	80.5	1.4e-21
g948	Calca_contig_34	Major Facilitator Superfamily	MFS_1	PF07690	443	468	80.5	1.4e-21
g948	Calca_contig_34	Sugar (and other) transporter	Sugar_tr	PF00083	12	477	512.3	1.1e-150
g948	Calca_contig_34	Major Facilitator Superfamily	MFS_1	PF07690	18	429	83.7	1.2e-21
g948	Calca_contig_34	Sugar (and other) transporter	Sugar_tr	PF00083	12	477	514.2	3e-151
g949	Calca_contig_34	Taurine catabolism dioxygenase TauD, TfdA family	TauD	PF02668	36	347	368.8	1.8e-107
g949	Calca_contig_34	Taurine catabolism dioxygenase TauD, TfdA family	TauD	PF02668	36	347	370.7	4.8e-108
g954	Calca_contig_34	FAD dependent oxidoreductase	DAO	PF01266	7	38	21.8	1.2e-05
g954	Calca_contig_34	FAD binding domain	FAD_binding_2	PF00890	7	27	21.7	5.7e-06
g954	Calca_contig_34	FAD binding domain	FAD_binding_3	PF01494	5	27	18	4.9e-05
g954	Calca_contig_34	HI0933-like protein	HI0933_like	PF03486	6	35	22.9	5.1e-06
g954	Calca_contig_34	Pyridine nucleotide-disulphide oxidoreductase	Pyr_redox_2	PF07992	7	26	27	1.4e-06
g954	Calca_contig_34	Pyridine nucleotide-disulphide oxidoreductase	Pyr_redox_2	PF07992	272	288	27	1.4e-06
g954	Calca_contig_34	Pyridine nucleotide-disulphide oxidoreductase	Pyr_redox_2	PF07992	7	288	-7.9	0.0002
g960	Calca_contig_34	haloacid dehalogenase-like hydrolase	Hydrolase	PF00702	7	205	24.3	2.8e-06
g960	Calca_contig_34	haloacid dehalogenase-like hydrolase	Hydrolase	PF00702	7	205	26.2	0.00024
g965	Calca_contig_34	Major Facilitator Superfamily	MFS_1	PF07690	32	429	43.4	2.1e-11
g965	Calca_contig_34	Sugar (and other) transporter	Sugar_tr	PF00083	28	481	327.6	4.4e-95
g965	Calca_contig_34	Major Facilitator Superfamily	MFS_1	PF07690	32	429	45.3	4.3e-10
g965	Calca_contig_34	Sugar (and other) transporter	Sugar_tr	PF00083	28	481	329.5	1.2e-95
g966	Calca_contig_34	Fungal Zn(2)-Cys(6) binuclear cluster domain	Zn_clus	PF00172	35	54	40.5	5e-12
g966	Calca_contig_34	Fungal Zn(2)-Cys(6) binuclear cluster domain	Zn_clus	PF00172	88	126	40.5	5e-12
g966	Calca_contig_34	Fungal Zn(2)-Cys(6) binuclear cluster domain	Zn_clus	PF00172	88	126	41.4	6.5e-09
g967	Calca_contig_34	Major Facilitator Superfamily	MFS_1	PF07690	73	458	95.6	1e-25
g967	Calca_contig_34	Sugar (and other) transporter	Sugar_tr	PF00083	109	176	17.9	0.00012
g967	Calca_contig_34	Major Facilitator Superfamily	MFS_1	PF07690	73	458	97.5	8.1e-26
g967	Calca_contig_34	Sugar (and other) transporter	Sugar_tr	PF00083	78	476	-124.3	0.00079
g969	Calca_contig_34	Uncharacterised protein family (UPF0187)	UPF0187	PF05249	122	204	122.9	8.8e-35
g969	Calca_contig_34	Uncharacterised protein family (UPF0187)	UPF0187	PF05249	304	413	122.9	8.8e-35
g969	Calca_contig_34	Uncharacterised protein family (UPF0187)	UPF0187	PF05249	71	413	71.2	6.9e-18
g970	Calca_contig_34	Ankyrin repeat	Ank	PF00023	84	116	138.9	2.9e-38
g970	Calca_contig_34	Ankyrin repeat	Ank	PF00023	121	150	138.9	2.9e-38
g970	Calca_contig_34	Ankyrin repeat	Ank	PF00023	151	183	138.9	2.9e-38
g970	Calca_contig_34	Ankyrin repeat	Ank	PF00023	184	216	138.9	2.9e-38
g970	Calca_contig_34	Ankyrin repeat	Ank	PF00023	217	249	138.9	2.9e-38
g970	Calca_contig_34	DHHC zinc finger domain	zf-DHHC	PF01529	440	504	100.4	1.6e-27
g970	Calca_contig_34	Ankyrin repeat	Ank	PF00023	84	116	146.8	1.2e-40
g970	Calca_contig_34	Ankyrin repeat	Ank	PF00023	118	150	146.8	1.2e-40
g970	Calca_contig_34	Ankyrin repeat	Ank	PF00023	151	183	146.8	1.2e-40
g970	Calca_contig_34	Ankyrin repeat	Ank	PF00023	184	216	146.8	1.2e-40
g970	Calca_contig_34	Ankyrin repeat	Ank	PF00023	217	249	146.8	1.2e-40
g970	Calca_contig_34	DHHC zinc finger domain	zf-DHHC	PF01529	440	504	102.4	2.7e-27
g975	Calca_contig_34	CBS domain pair	CBS	PF00571	376	526	48.8	2.2e-12
g975	Calca_contig_34	Pyridoxal-phosphate dependent enzyme	PALP	PF00291	21	324	370.4	6e-108
g975	Calca_contig_34	CBS domain pair	CBS	PF00571	376	526	50.7	1e-11
g975	Calca_contig_34	Pyridoxal-phosphate dependent enzyme	PALP	PF00291	21	324	372.2	1.7e-108
g976	Calca_contig_34	GTPase of unknown function	MMR_HSR1	PF01926	47	192	30.4	3.4e-07
g976	Calca_contig_34	Signal recognition particle receptor beta subunit	SRPRB	PF09439	44	221	87.5	1.8e-24
g976	Calca_contig_34	GTPase of unknown function	MMR_HSR1	PF01926	47	192	32.3	2.4e-06
g976	Calca_contig_34	Signal recognition particle receptor beta subunit	SRPRB	PF09439	44	258	87.6	7.7e-23
g977	Calca_contig_34	Protein kinase domain	Pkinase	PF00069	68	320	289.8	1.1e-83
g977	Calca_contig_34	Protein tyrosine kinase	Pkinase_Tyr	PF07714	68	211	69.8	9.1e-20
g977	Calca_contig_34	Protein kinase domain	Pkinase	PF00069	68	320	291.6	3.1e-84
g977	Calca_contig_34	Protein tyrosine kinase	Pkinase_Tyr	PF07714	68	320	52.1	2.8e-15
g978	Calca_contig_34	Chitin synthase	Chitin_synth_2	PF03142	196	251	29.8	3e-08
g978	Calca_contig_34	Chitin synthase	Chitin_synth_2	PF03142	488	509	29.8	3e-08
g978	Calca_contig_34	Glycosyl transferase family 2	Glycos_transf_2	PF00535	196	236	20.1	2.4e-05
g978	Calca_contig_34	Glycosyl transferase family 2	Glycos_transf_2	PF00535	346	437	20.1	2.4e-05
g978	Calca_contig_34	Chitin synthase	Chitin_synth_2	PF03142	169	683	-165.6	3.7e-10
g979	Calca_contig_34	PA domain	PA	PF02225	119	222	59.9	2.2e-15
g979	Calca_contig_34	Peptidase family M20/M25/M40	Peptidase_M20	PF01546	260	312	18.3	0.00012
g979	Calca_contig_34	Peptidase family M28	Peptidase_M28	PF04389	257	426	180.2	1.9e-52
g979	Calca_contig_34	PA domain	PA	PF02225	119	222	61.8	4.5e-15
g979	Calca_contig_34	Peptidase family M28	Peptidase_M28	PF04389	257	426	182	3.1e-51
g980	Calca_contig_34	Chitin recognition protein	Chitin_bind_1	PF00187	40	75	15.9	0.00068
g980	Calca_contig_34	Chitin recognition protein	Chitin_bind_1	PF00187	368	392	15.9	0.00068
g980	Calca_contig_34	Polysaccharide deacetylase	Polysacc_deac_1	PF01522	112	245	107.9	7.9e-30
g980	Calca_contig_34	Chitin recognition protein	Chitin_bind_1	PF00187	40	78	28.1	6.4e-05
g980	Calca_contig_34	Polysaccharide deacetylase	Polysacc_deac_1	PF01522	112	245	109.8	1.7e-29
g981	Calca_contig_34	UDP-glucose/GDP-mannose dehydrogenase family, central domain	UDPG_MGDP_dh	PF00984	240	310	66.4	6.7e-18
g981	Calca_contig_34	UDP-glucose/GDP-mannose dehydrogenase family, NAD binding domain	UDPG_MGDP_dh_N	PF03721	62	99	58.2	1.4e-14
g981	Calca_contig_34	UDP-glucose/GDP-mannose dehydrogenase family, NAD binding domain	UDPG_MGDP_dh_N	PF03721	108	232	58.2	1.4e-14
g981	Calca_contig_34	UDP-glucose/GDP-mannose dehydrogenase family, central domain	UDPG_MGDP_dh	PF00984	240	328	61.2	7.2e-15
g981	Calca_contig_34	UDP-glucose/GDP-mannose dehydrogenase family, NAD binding domain	UDPG_MGDP_dh_N	PF03721	62	232	52.7	1.9e-12
g982	Calca_contig_34	Catalase	Catalase	PF00199	61	428	740.2	2.9e-219
g982	Calca_contig_34	Catalase-related	Catalase-rel	PF06628	469	522	66.3	3.1e-17
g982	Calca_contig_34	DJ-1/PfpI family	DJ-1_PfpI	PF01965	587	655	31.2	3.6e-08
g982	Calca_contig_34	Catalase	Catalase	PF00199	25	428	737.4	2e-218
g982	Calca_contig_34	Catalase-related	Catalase-rel	PF06628	469	522	68.3	5.1e-17
g982	Calca_contig_34	DJ-1/PfpI family	DJ-1_PfpI	PF01965	587	719	13.7	0.00052
g985	Calca_contig_34	Berberine and berberine like	BBE	PF08031	424	470	46.8	2.8e-12
g985	Calca_contig_34	FAD binding domain	FAD_binding_4	PF01565	48	186	119.6	9.8e-33
g985	Calca_contig_34	Berberine and berberine like	BBE	PF08031	424	470	48.6	4.3e-11
g985	Calca_contig_34	FAD binding domain	FAD_binding_4	PF01565	48	186	121.6	4.7e-33
g986	Calca_contig_34	Thiamine pyrophosphate enzyme, C-terminal TPP binding domain	TPP_enzyme_C	PF02775	492	660	76.2	3.8e-23
g986	Calca_contig_34	Thiamine pyrophosphate enzyme, central domain	TPP_enzyme_M	PF00205	289	421	63.9	4.7e-17
g986	Calca_contig_34	Thiamine pyrophosphate enzyme, C-terminal TPP binding domain	TPP_enzyme_C	PF02775	492	660	77.9	6.6e-20
g986	Calca_contig_34	Thiamine pyrophosphate enzyme, central domain	TPP_enzyme_M	PF00205	289	421	65.7	3.2e-16
g986	Calca_contig_34	Thiamine pyrophosphate enzyme, N-terminal TPP binding domain	TPP_enzyme_N	PF02776	84	270	-20.6	1.2e-06
g988	Calca_contig_34	Cyclin	Cyclin	PF08613	223	356	190.3	4.5e-58
g988	Calca_contig_34	Cyclin	Cyclin	PF08613	183	356	181.9	3.3e-51
g989	Calca_contig_34	Glutathione S-transferase, C-terminal domain	GST_C	PF00043	125	199	33.2	9.9e-09
g989	Calca_contig_34	Glutathione S-transferase, N-terminal domain	GST_N	PF02798	1	77	58.5	1.6e-14
g989	Calca_contig_34	Glutathione S-transferase, C-terminal domain	GST_C	PF00043	111	199	31.7	5.4e-06
g989	Calca_contig_34	Glutathione S-transferase, N-terminal domain	GST_N	PF02798	1	77	60.4	1.2e-14
g990	Calca_contig_34	Acetyltransferase (GNAT) family	Acetyltransf_1	PF00583	74	202	29.9	4.8e-09
g990	Calca_contig_34	Acetyltransferase (GNAT) family	Acetyltransf_1	PF00583	74	202	31.8	4.8e-06
g994	Calca_contig_34	OPT oligopeptide transporter protein	OPT	PF03169	123	793	722.1	7.6e-214
g994	Calca_contig_34	OPT oligopeptide transporter protein	OPT	PF03169	123	793	724	2.1e-214
g999	Calca_contig_34	FAD-binding domain	FAD_binding_8	PF08022	307	409	43.8	1.2e-11
g999	Calca_contig_34	Ferric reductase like transmembrane component	Ferric_reduct	PF01794	139	257	84.8	1.5e-22
g999	Calca_contig_34	Ferric reductase NAD binding domain	NAD_binding_6	PF08030	515	601	15.6	0.0006
g999	Calca_contig_34	FAD-binding domain	FAD_binding_8	PF08022	307	409	45.5	3.8e-10
g999	Calca_contig_34	Ferric reductase like transmembrane component	Ferric_reduct	PF01794	139	257	86.6	1.6e-22
g999	Calca_contig_34	Ferric reductase NAD binding domain	NAD_binding_6	PF08030	414	601	-7.2	0.00051
g1002	Calca_contig_34	ABC transporter	ABC_tran	PF00005	680	844	244.4	5.1e-70
g1002	Calca_contig_34	ABC transporter	ABC_tran	PF00005	1271	1448	244.4	5.1e-70
g1002	Calca_contig_34	ABC transporter	ABC_tran	PF00005	670	844	244.4	5.1e-70
g1002	Calca_contig_34	ABC transporter	ABC_tran	PF00005	1271	1448	244.4	5.1e-70
g1004	Calca_contig_34	Berberine and berberine like	BBE	PF08031	424	447	30.4	1.3e-07
g1004	Calca_contig_34	FAD binding domain	FAD_binding_4	PF01565	40	175	152	3.2e-42
g1004	Calca_contig_34	FAD binding domain	FAD_binding_4	PF01565	40	175	154	8.3e-43
g1006	Calca_contig_34	Amino acid permease	AA_permease	PF00324	57	526	507.1	4.1e-149
g1006	Calca_contig_34	Amino acid permease	AA_permease	PF00324	57	526	509	1.1e-149
g1011	Calca_contig_34	Zinc finger, C3HC4 type (RING finger)	zf-C3HC4	PF00097	188	234	74.2	1e-25
g1011	Calca_contig_34	Zinc finger, C3HC4 type (RING finger)	zf-C3HC4	PF00097	188	234	76.2	2.2e-19
g1015	Calca_contig_34	NUDE protein, C-terminal conserved region	NUDE_C	PF04880	131	185	85.8	2e-27
g1015	Calca_contig_34	NUDE protein, C-terminal conserved region	NUDE_C	PF04880	219	232	85.8	2e-27
g1015	Calca_contig_34	NUDE protein, C-terminal conserved region	NUDE_C	PF04880	131	300	70.3	1.3e-17
g1016	Calca_contig_34	BolA-like protein	BolA	PF01722	86	150	52.2	1.8e-14
g1016	Calca_contig_34	BolA-like protein	BolA	PF01722	72	150	52.9	2.2e-12
g1017	Calca_contig_34	Acetyl-CoA carboxylase, central region	ACC_central	PF08326	771	1500	1297.5	0
g1017	Calca_contig_34	Biotin carboxylase C-terminal domain	Biotin_carb_C	PF02785	459	566	162.9	1e-49
g1017	Calca_contig_34	Biotin-requiring enzyme	Biotin_lipoyl	PF00364	704	770	79.9	4.2e-21
g1017	Calca_contig_34	Carboxyl transferase domain	Carboxyl_trans	PF01039	1597	2154	954.3	9.7e-284
g1017	Calca_contig_34	Carbamoyl-phosphate synthase L chain, N-terminal domain	CPSase_L_chain	PF00289	62	187	182.8	4.3e-52
g1017	Calca_contig_34	Carbamoyl-phosphate synthase L chain, ATP binding domain	CPSase_L_D2	PF02786	189	206	189.1	1.8e-53
g1017	Calca_contig_34	Carbamoyl-phosphate synthase L chain, ATP binding domain	CPSase_L_D2	PF02786	235	422	189.1	1.8e-53
g1017	Calca_contig_34	Acetyl-CoA carboxylase, central region	ACC_central	PF08326	771	1500	1299.4	0
g1017	Calca_contig_34	Biotin carboxylase C-terminal domain	Biotin_carb_C	PF02785	459	566	164.8	4.5e-46
g1017	Calca_contig_34	Biotin-requiring enzyme	Biotin_lipoyl	PF00364	704	770	81.8	4.5e-21
g1017	Calca_contig_34	Carboxyl transferase domain	Carboxyl_trans	PF01039	1597	2154	956.3	2.5e-284
g1017	Calca_contig_34	Carbamoyl-phosphate synthase L chain, N-terminal domain	CPSase_L_chain	PF00289	62	187	184.8	4.4e-52
g1017	Calca_contig_34	Carbamoyl-phosphate synthase L chain, ATP binding domain	CPSase_L_D2	PF02786	211	422	185.1	3.5e-52
g1020	Calca_contig_34	FAD binding domain	FAD_binding_3	PF01494	7	25	26.3	1.7e-07
g1020	Calca_contig_34	FAD binding domain	FAD_binding_3	PF01494	174	188	26.3	1.7e-07
g1020	Calca_contig_34	FAD binding domain	FAD_binding_3	PF01494	356	388	26.3	1.7e-07
g1020	Calca_contig_34	FAD binding domain	FAD_binding_3	PF01494	3	420	-92.4	5e-06
g1021	Calca_contig_34	PA domain	PA	PF02225	378	463	39.1	1.1e-09
g1021	Calca_contig_34	Subtilase family	Peptidase_S8	PF00082	137	335	142.8	3.3e-40
g1021	Calca_contig_34	Subtilase family	Peptidase_S8	PF00082	513	580	142.8	3.3e-40
[truncated: 27,215 more rows]

## Sheet: Legend
Table S6: Summary of protein domains in the genome of Calcarisporium sp. KF525.
