# Supplementary material for: Genome Sequencing and analyses of Two Marine Fungi from the North Sea Unraveled a Plethora of Novel Biosynthetic Gene Clusters
Source: Sci Rep. 2018 Jul 5;8:10187. doi: 10.1038/s41598-018-28473-z (PMC6033941; doi:10.1038/s41598-018-28473-z)
Supplement: Supplementary file 8 — Table S7 [file 41598_2018_28473_MOESM8_ESM.xlsx]

## Sheet: Table S7
Gene ID	Sequence	Pfam Accession ID	Pfam Domain	Description	Start	End	Score	E-value
g2	Pesta-scaffold00001	PF01490.13	Aa_trans	Transmembrane amino acid transporter protein	45	442	89.2	1.9e-25
g6	Pesta-scaffold00001	PF00120.19	Gln-synt_C	Glutamine synthetase, catalytic domain	255	409	134.4	3.7e-39
g7	Pesta-scaffold00001	PF04199.8	Cyclase	Putative cyclase	262	430	113.2	9.7e-33
g9	Pesta-scaffold00001	PF03746.11	LamB_YcsF	LamB/YcsF family	308	549	179.1	7.3e-53
g9	Pesta-scaffold00001	PF13561.1	adh_short_C2	Enoyl-(Acyl carrier protein) reductase	15	266	86.1	3e-24
g10	Pesta-scaffold00001	PF04082.13	Fungal_trans	Fungal specific transcription factor domain	295	604	42	4.6e-11
g10	Pesta-scaffold00001	PF13465.1	zf-H2C2_2	Zinc-finger double domain	33	57	24.1	2.9e-05
g12	Pesta-scaffold00001	PF07519.6	Tannase	Tannase and feruloyl esterase	59	508	279.5	4.6e-83
g13	Pesta-scaffold00001	PF11951.3	Fungal_trans_2	Fungal specific transcription factor domain	135	329	37.2	1.2e-09
g13	Pesta-scaffold00001	PF00172.13	Zn_clus	Fungal Zn(2)-Cys(6) binuclear cluster domain	32	70	32	8.1e-08
g17	Pesta-scaffold00001	PF06985.6	HET	Heterokaryon incompatibility protein (HET)	250	426	79.6	2.4e-22
g21	Pesta-scaffold00001	PF00109.21	ketoacyl-synt	Beta-ketoacyl synthase, N-terminal domain	47	299	211.2	1.6e-62
g21	Pesta-scaffold00001	PF08659.5	KR	KR domain	2103	2282	188.5	8.1e-56
g21	Pesta-scaffold00001	PF00698.16	Acyl_transf_1	Acyl transferase domain	602	952	175.4	1.7e-51
g21	Pesta-scaffold00001	PF14765.1	PS-DH	Polyketide synthase dehydratase	1009	1325	173.5	5.1e-51
g21	Pesta-scaffold00001	PF02801.17	Ketoacyl-synt_C	Beta-ketoacyl synthase, C-terminal domain	307	423	112.4	1e-32
g21	Pesta-scaffold00001	PF00107.21	ADH_zinc_N	Zinc-binding dehydrogenase	1899	2032	56.5	1.9e-15
g21	Pesta-scaffold00001	PF08240.7	ADH_N	Alcohol dehydrogenase GroES-like domain	1780	1859	21.3	0.00017
g22	Pesta-scaffold00001	PF13561.1	adh_short_C2	Enoyl-(Acyl carrier protein) reductase	10	268	102	4.2e-29
g23	Pesta-scaffold00001	PF00106.20	adh_short	short chain dehydrogenase	6	168	73.7	1.6e-20
g24	Pesta-scaffold00001	PF07883.6	Cupin_2	Cupin domain	89	159	27.2	1.9e-06
g25	Pesta-scaffold00001	PF04082.13	Fungal_trans	Fungal specific transcription factor domain	181	378	67.4	8.7e-19
g26	Pesta-scaffold00001	PF11991.3	Trp_DMAT	Tryptophan dimethylallyltransferase	34	394	256.2	5.1e-76
g27	Pesta-scaffold00001	PF07883.6	Cupin_2	Cupin domain	98	170	25.7	5.5e-06
g28	Pesta-scaffold00001	PF01565.18	FAD_binding_4	FAD binding domain	84	220	88.9	1.9e-25
g28	Pesta-scaffold00001	PF08031.7	BBE	Berberine and berberine like	465	508	28.8	8.1e-07
g29	Pesta-scaffold00001	PF11951.3	Fungal_trans_2	Fungal specific transcription factor domain	95	448	94.5	4.9e-27
g30	Pesta-scaffold00001	PF00067.17	p450	Cytochrome P450	35	497	236.5	4.3e-70
g31	Pesta-scaffold00001	PF01565.18	FAD_binding_4	FAD binding domain	88	223	70	1.3e-19
g31	Pesta-scaffold00001	PF08031.7	BBE	Berberine and berberine like	475	521	21.4	0.00017
g32	Pesta-scaffold00001	PF00106.20	adh_short	short chain dehydrogenase	2	188	37.9	1.5e-09
g34	Pesta-scaffold00001	PF07690.11	MFS_1	Major Facilitator Superfamily	65	469	133.4	7.4e-39
g35	Pesta-scaffold00001	PF07883.6	Cupin_2	Cupin domain	56	123	28	1.1e-06
g36	Pesta-scaffold00001	PF00106.20	adh_short	short chain dehydrogenase	38	172	45.7	6.2e-12
g37	Pesta-scaffold00001	PF00067.17	p450	Cytochrome P450	5	443	226.2	5.5e-67
g38	Pesta-scaffold00001	PF00884.18	Sulfatase	Sulfatase	44	381	154.5	3.5e-45
g41	Pesta-scaffold00001	PF06985.6	HET	Heterokaryon incompatibility protein (HET)	241	410	46.9	2.9e-12
g42	Pesta-scaffold00001	PF06985.6	HET	Heterokaryon incompatibility protein (HET)	41	123	27.1	3.7e-06
g43	Pesta-scaffold00001	PF08240.7	ADH_N	Alcohol dehydrogenase GroES-like domain	28	159	84.8	3e-24
g43	Pesta-scaffold00001	PF00107.21	ADH_zinc_N	Zinc-binding dehydrogenase	201	331	81.1	4.7e-23
g45	Pesta-scaffold00001	PF00004.24	AAA	ATPase family associated with various cellular activities (AAA)	650	771	62.3	4.9e-17
g46	Pesta-scaffold00001	PF07519.6	Tannase	Tannase and feruloyl esterase	122	243	92.8	1.8e-26
g48	Pesta-scaffold00001	PF00732.14	GMC_oxred_N	GMC oxidoreductase	652	959	212.3	8.1e-63
g48	Pesta-scaffold00001	PF05199.8	GMC_oxred_C	GMC oxidoreductase	1089	1229	99.6	1.7e-28
g50	Pesta-scaffold00001	PF05495.7	zf-CHY	CHY zinc finger	589	651	54.7	8.1e-15
g54	Pesta-scaffold00001	PF01512.12	Complex1_51K	Respiratory-chain NADH dehydrogenase 51 Kd subunit	104	280	159.8	3.6e-47
g54	Pesta-scaffold00001	PF10589.4	NADH_4Fe-4S	NADH-ubiquinone oxidoreductase-F iron-sulfur binding region	391	436	64.5	3.4e-18
g54	Pesta-scaffold00001	PF10531.4	SLBB	SLBB domain	302	354	36.1	4.4e-09
g56	Pesta-scaffold00001	PF00132.19	Hexapep	Bacterial transferase hexapeptide (six repeats)	108	143	28.6	6.3e-07
g61	Pesta-scaffold00001	PF00324.16	AA_permease	Amino acid permease	47	501	341.5	5.6e-102
g62	Pesta-scaffold00001	PF13489.1	Methyltransf_23	Methyltransferase domain	102	277	73	2.1e-20
g63	Pesta-scaffold00001	PF00926.14	DHBP_synthase	3,4-dihydroxy-2-butanone 4-phosphate synthase	14	219	242.1	2.5e-72
g64	Pesta-scaffold00001	PF12697.2	Abhydrolase_6	Alpha/beta hydrolase family	130	397	56.4	3.6e-15
g66	Pesta-scaffold00001	PF13465.1	zf-H2C2_2	Zinc-finger double domain	181	208	30.4	2.9e-07
g66	Pesta-scaffold00001	PF00096.21	zf-C2H2	Zinc finger, C2H2 type	109	131	25.1	1.4e-05
g66	Pesta-scaffold00001	PF13894.1	zf-C2H2_4	C2H2-type zinc finger	137	162	13.6	0.063
g67	Pesta-scaffold00001	PF01323.15	DSBA	DSBA-like thioredoxin domain	28	252	33.9	2.1e-08
g72	Pesta-scaffold00001	PF00173.23	Cyt-b5	Cytochrome b5-like Heme/Steroid binding domain	5	79	87.4	3.9e-25
g74	Pesta-scaffold00001	PF01267.12	F-actin_cap_A	F-actin capping protein alpha subunit	2	264	313.7	7.5e-94
g75	Pesta-scaffold00001	PF02779.19	Transket_pyr	Transketolase, pyrimidine binding domain	77	256	152.1	1.1e-44
g75	Pesta-scaffold00001	PF02780.15	Transketolase_C	Transketolase, C-terminal domain	270	391	111.2	2.8e-32
g76	Pesta-scaffold00001	PF00150.13	Cellulase	Cellulase (glycosyl hydrolase family 5)	485	753	42.4	4.5e-11
g81	Pesta-scaffold00001	PF01687.12	Flavokinase	Riboflavin kinase	18	165	125.4	1.1e-36
g83	Pesta-scaffold00001	PF02171.12	Piwi	Piwi domain	705	1017	231.7	8.7e-69
g83	Pesta-scaffold00001	PF02170.17	PAZ	PAZ domain	466	548	45.1	5.7e-12
g83	Pesta-scaffold00001	PF08699.5	DUF1785	Domain of unknown function (DUF1785)	313	367	33.1	2.5e-08
g84	Pesta-scaffold00001	PF07690.11	MFS_1	Major Facilitator Superfamily	34	441	137	6.1e-40
g86	Pesta-scaffold00001	PF01565.18	FAD_binding_4	FAD binding domain	191	336	64.9	5e-18
g86	Pesta-scaffold00001	PF08031.7	BBE	Berberine and berberine like	589	633	37.4	1.7e-09
g89	Pesta-scaffold00001	PF00583.19	Acetyltransf_1	Acetyltransferase (GNAT) family	117	212	32.9	4.7e-08
g90	Pesta-scaffold00001	PF13639.1	zf-RING_2	Ring finger domain	124	171	42.4	4.4e-11
g94	Pesta-scaffold00001	PF00083.19	Sugar_tr	Sugar (and other) transporter	50	445	207.7	2.3e-61
g96	Pesta-scaffold00001	PF06964.7	Alpha-L-AF_C	Alpha-L-arabinofuranosidase C-terminus	312	506	108	4.4e-31
g97	Pesta-scaffold00001	PF00067.17	p450	Cytochrome P450	42	535	193.7	4e-57
g99	Pesta-scaffold00001	PF01565.18	FAD_binding_4	FAD binding domain	45	180	98	2.9e-28
g101	Pesta-scaffold00001	PF00150.13	Cellulase	Cellulase (glycosyl hydrolase family 5)	38	377	62.5	3.5e-17
g102	Pesta-scaffold00001	PF00383.17	dCMP_cyt_deam_1	Cytidine and deoxycytidylate deaminase zinc-binding region	714	831	43.4	2e-11
g103	Pesta-scaffold00001	PF00226.26	DnaJ	DnaJ domain	16	82	79.1	1.5e-22
g105	Pesta-scaffold00001	PF10451.4	Stn1	Telomere regulation protein Stn1	280	475	56	2.4e-15
g107	Pesta-scaffold00001	PF03639.8	Glyco_hydro_81	Glycosyl hydrolase family 81	17	708	690.2	2.4e-207
g108	Pesta-scaffold00001	PF07859.8	Abhydrolase_3	alpha/beta hydrolase fold	98	310	211.6	8.7e-63
g110	Pesta-scaffold00001	PF07690.11	MFS_1	Major Facilitator Superfamily	54	422	119.1	1.6e-34
g112	Pesta-scaffold00001	PF00067.17	p450	Cytochrome P450	101	532	201	2.5e-59
g115	Pesta-scaffold00001	PF01565.18	FAD_binding_4	FAD binding domain	44	178	86	1.5e-24
g116	Pesta-scaffold00001	PF07690.11	MFS_1	Major Facilitator Superfamily	42	456	144.9	2.4e-42
g121	Pesta-scaffold00001	PF01565.18	FAD_binding_4	FAD binding domain	93	230	83.1	1.1e-23
g121	Pesta-scaffold00001	PF08031.7	BBE	Berberine and berberine like	488	528	20.7	0.00028
g124	Pesta-scaffold00001	PF01565.18	FAD_binding_4	FAD binding domain	65	202	62.1	3.5e-17
g127	Pesta-scaffold00001	PF00067.17	p450	Cytochrome P450	67	496	108.8	2.2e-31
g129	Pesta-scaffold00001	PF13813.1	MBOAT_2	Membrane bound O-acyl transferase family	245	333	69.1	2.5e-19
g130	Pesta-scaffold00001	PF07690.11	MFS_1	Major Facilitator Superfamily	47	458	120.3	6.9e-35
g131	Pesta-scaffold00001	PF00067.17	p450	Cytochrome P450	277	479	86.8	1e-24
g134	Pesta-scaffold00001	PF09362.5	DUF1996	Domain of unknown function (DUF1996)	32	284	257.4	1.2e-76
g136	Pesta-scaffold00001	PF00465.14	Fe-ADH	Iron-containing alcohol dehydrogenase	24	406	202.1	9.3e-60
g137	Pesta-scaffold00001	PF00076.17	RRM_1	RNA recognition motif. (a.k.a. RRM, RBD, or RNP domain)	7	72	36	3.8e-09
g142	Pesta-scaffold00001	PF00067.17	p450	Cytochrome P450	222	501	76.4	1.5e-21
g144	Pesta-scaffold00001	PF02797.10	Chal_sti_synt_C	Chalcone and stilbene synthases, C-terminal domain	233	386	79.5	2.3e-22
g144	Pesta-scaffold00001	PF00195.14	Chal_sti_synt_N	Chalcone and stilbene synthases, N-terminal domain	46	223	78.1	5.4e-22
g147	Pesta-scaffold00001	PF03443.9	Glyco_hydro_61	Glycosyl hydrolase family 61	18	236	204.4	1.8e-60
g150	Pesta-scaffold00001	PF03656.8	Pam16	Pam16	1	131	107.6	3.6e-31
g152	Pesta-scaffold00001	PF09084.6	NMT1	NMT1/THI5 like	51	245	43.7	2.3e-11
g154	Pesta-scaffold00001	PF05225.11	HTH_psq	helix-turn-helix, Psq domain	61	97	36.2	3e-09
g154	Pesta-scaffold00001	PF03221.11	HTH_Tnp_Tc5	Tc5 transposase DNA-binding domain	173	234	35.4	6.4e-09
g155	Pesta-scaffold00001	PF07690.11	MFS_1	Major Facilitator Superfamily	65	439	102.1	2.5e-29
g157	Pesta-scaffold00001	PF00067.17	p450	Cytochrome P450	123	502	175.7	1.2e-51
g158	Pesta-scaffold00001	PF13417.1	GST_N_3	Glutathione S-transferase, N-terminal domain	8	86	46.3	3.6e-12
g158	Pesta-scaffold00001	PF00043.20	GST_C	Glutathione S-transferase, C-terminal domain	108	204	23.6	3.6e-05
g159	Pesta-scaffold00001	PF00172.13	Zn_clus	Fungal Zn(2)-Cys(6) binuclear cluster domain	9	44	31.1	1.5e-07
g160	Pesta-scaffold00001	PF00075.19	RNase_H	RNase H	71	242	24.5	2.6e-05
g161	Pesta-scaffold00001	PF00743.14	FMO-like	Flavin-binding monooxygenase-like	5	529	188.1	1.8e-55
g163	Pesta-scaffold00001	PF00775.16	Dioxygenase_C	Dioxygenase	123	245	37.1	1.8e-09
g166	Pesta-scaffold00001	PF07859.8	Abhydrolase_3	alpha/beta hydrolase fold	85	292	116.6	1.1e-33
g170	Pesta-scaffold00001	PF03134.14	TB2_DP1_HVA22	TB2/DP1, HVA22 family	2	95	98.5	1.4e-28
g171	Pesta-scaffold00001	PF06420.7	Mgm101p	Mitochondrial genome maintenance MGM101	1646	1816	285.8	7.1e-86
g171	Pesta-scaffold00001	PF00520.26	Ion_trans	Ion transport protein	373	561	26.2	3.9e-06
g173	Pesta-scaffold00001	PF09825.4	BPL_N	Biotin-protein ligase, N terminal	6	385	461.8	1.2e-138
g173	Pesta-scaffold00001	PF03099.14	BPL_LplA_LipB	Biotin/lipoate A/B protein ligase family	404	548	67.2	1.2e-18
g174	Pesta-scaffold00001	PF12796.2	Ank_2	Ankyrin repeats (3 copies)	173	273	41.8	1e-10
g175	Pesta-scaffold00001	PF00732.14	GMC_oxred_N	GMC oxidoreductase	41	356	208	1.7e-61
g175	Pesta-scaffold00001	PF05199.8	GMC_oxred_C	GMC oxidoreductase	467	609	135	2.2e-39
g176	Pesta-scaffold00001	PF00067.17	p450	Cytochrome P450	78	497	176	9.6e-52
g177	Pesta-scaffold00001	PF01494.14	FAD_binding_3	FAD binding domain	4	355	74.9	5.6e-21
g180	Pesta-scaffold00001	PF06609.8	TRI12	Fungal trichothecene efflux pump (TRI12)	90	619	105.1	2.7e-30
g186	Pesta-scaffold00001	PF03881.9	Fructosamin_kin	Fructosamine kinase	141	283	61.9	4.6e-17
g187	Pesta-scaffold00001	PF00383.17	dCMP_cyt_deam_1	Cytidine and deoxycytidylate deaminase zinc-binding region	12	136	48.9	3.7e-13
g188	Pesta-scaffold00001	PF13847.1	Methyltransf_31	Methyltransferase domain	42	184	29.7	3.9e-07
g189	Pesta-scaffold00001	PF01565.18	FAD_binding_4	FAD binding domain	60	197	71.6	4.3e-20
g189	Pesta-scaffold00001	PF08031.7	BBE	Berberine and berberine like	450	496	49.1	3.7e-13
g195	Pesta-scaffold00001	PF00856.23	SET	SET domain	16	166	45.6	8.5e-12
g197	Pesta-scaffold00001	PF14748.1	P5CR_dimer	Pyrroline-5-carboxylate reductase dimerisation	171	277	128.3	1e-37
g197	Pesta-scaffold00001	PF03807.12	F420_oxidored	NADP oxidoreductase coenzyme F420-dependent	8	104	67.5	9.9e-19
g199	Pesta-scaffold00001	PF01565.18	FAD_binding_4	FAD binding domain	40	177	90.1	8e-26
g201	Pesta-scaffold00001	PF11905.3	DUF3425	Domain of unknown function (DUF3425)	205	330	69.5	2.4e-19
g202	Pesta-scaffold00001	PF06609.8	TRI12	Fungal trichothecene efflux pump (TRI12)	17	574	259.8	4e-77
g204	Pesta-scaffold00001	PF00378.15	ECH	Enoyl-CoA hydratase/isomerase family	21	266	176.6	4.3e-52
g205	Pesta-scaffold00001	PF00378.15	ECH	Enoyl-CoA hydratase/isomerase family	29	273	120.7	5.1e-35
g207	Pesta-scaffold00001	PF01575.14	MaoC_dehydratas	MaoC like domain	184	305	84.8	2.7e-24
g207	Pesta-scaffold00001	PF13452.1	MaoC_dehydrat_N	N-terminal half of MaoC dehydratase	21	160	29	7.3e-07
g208	Pesta-scaffold00001	PF07287.6	DUF1446	Protein of unknown function (DUF1446)	16	376	416.7	4.8e-125
g210	Pesta-scaffold00001	PF00501.23	AMP-binding	AMP-binding enzyme	25	443	243.2	3.2e-72
g210	Pesta-scaffold00001	PF13193.1	AMP-binding_C	AMP-binding enzyme C-terminal domain	451	534	24.3	4.3e-05
g211	Pesta-scaffold00001	PF07287.6	DUF1446	Protein of unknown function (DUF1446)	29	362	346.8	8.5e-104
g213	Pesta-scaffold00001	PF00150.13	Cellulase	Cellulase (glycosyl hydrolase family 5)	134	417	33.3	2.8e-08
g214	Pesta-scaffold00001	PF01485.16	IBR	IBR domain	657	717	32	8.1e-08
g218	Pesta-scaffold00001	PF01237.13	Oxysterol_BP	Oxysterol-binding protein	24	388	243.9	1.6e-72
g220	Pesta-scaffold00001	PF00686.14	CBM_20	Starch binding domain	383	474	86.5	6.6e-25
g220	Pesta-scaffold00001	PF03067.10	Chitin_bind_3	Chitin binding domain	117	241	24	3.9e-05
g221	Pesta-scaffold00001	PF01026.16	TatD_DNase	TatD related DNase	22	322	129.7	1e-37
g223	Pesta-scaffold00001	PF13419.1	HAD_2	Haloacid dehalogenase-like hydrolase	10	204	100.1	1.6e-28
g224	Pesta-scaffold00001	PF13816.1	Dehydratase_hem	Haem-containing dehydratase	120	301	151.8	2.1e-44
g228	Pesta-scaffold00001	PF00415.13	RCC1	Regulator of chromosome condensation (RCC1) repeat	290	340	37.4	2.1e-09
g228	Pesta-scaffold00001	PF13540.1	RCC1_2	Regulator of chromosome condensation (RCC1) repeat	385	414	33.7	1.8e-08
g240	Pesta-scaffold00001	PF03828.14	PAP_assoc	Cid1 family poly A polymerase	606	663	45.2	6.4e-12
g240	Pesta-scaffold00001	PF01909.18	NTP_transf_2	Nucleotidyltransferase domain	431	551	24.6	2.3e-05
g242	Pesta-scaffold00001	PF00083.19	Sugar_tr	Sugar (and other) transporter	10	478	366.7	1.4e-109
g246	Pesta-scaffold00001	PF01265.12	Cyto_heme_lyase	Cytochrome c/c1 heme lyase	1	317	258.9	5.1e-77
g247	Pesta-scaffold00001	PF03109.11	ABC1	ABC1 family	384	476	53.5	2e-14
g251	Pesta-scaffold00001	PF00450.17	Peptidase_S10	Serine carboxypeptidase	49	503	301	1.5e-89
g252	Pesta-scaffold00001	PF00732.14	GMC_oxred_N	GMC oxidoreductase	21	324	196.4	5.5e-58
g252	Pesta-scaffold00001	PF05199.8	GMC_oxred_C	GMC oxidoreductase	434	581	127.5	4.6e-37
g254	Pesta-scaffold00001	PF00067.17	p450	Cytochrome P450	40	435	175.8	1.1e-51
g257	Pesta-scaffold00001	PF02826.14	2-Hacid_dh_C	D-isomer specific 2-hydroxyacid dehydrogenase, NAD binding domain	152	354	147.6	2e-43
g257	Pesta-scaffold00001	PF00389.25	2-Hacid_dh	D-isomer specific 2-hydroxyacid dehydrogenase, catalytic domain	28	386	29.6	3.6e-07
g258	Pesta-scaffold00001	PF09286.6	Pro-kuma_activ	Pro-kumamolisin, activation domain	53	196	140.8	2.8e-41
g258	Pesta-scaffold00001	PF00082.17	Peptidase_S8	Subtilase family	400	686	21.7	9.2e-05
g260	Pesta-scaffold00001	PF14610.1	DUF4448	Protein of unknown function (DUF4448)	102	267	86.3	1.7e-24
g261	Pesta-scaffold00001	PF09229.6	Aha1_N	Activator of Hsp90 ATPase, N-terminal	13	146	121.7	1.7e-35
g261	Pesta-scaffold00001	PF08327.6	AHSA1	Activator of Hsp90 ATPase homolog 1-like protein	201	321	63.5	1.8e-17
g264	Pesta-scaffold00001	PF00775.16	Dioxygenase_C	Dioxygenase	136	290	42.2	4.6e-11
g267	Pesta-scaffold00001	PF00264.15	Tyrosinase	Common central domain of tyrosinase	58	313	154.3	5.1e-45
g267	Pesta-scaffold00001	PF00557.19	Peptidase_M24	Metallopeptidase family M24	813	1044	146.2	9e-43
g269	Pesta-scaffold00001	PF04616.9	Glyco_hydro_43	Glycosyl hydrolases family 43	31	306	138.8	1.7e-40
g271	Pesta-scaffold00001	PF00067.17	p450	Cytochrome P450	92	475	176.9	5e-52
g273	Pesta-scaffold00001	PF00632.20	HECT	HECT-domain (ubiquitin-transferase)	1013	1338	232.5	6.2e-69
g274	Pesta-scaffold00001	PF12756.2	zf-C2H2_2	C2H2 type zinc-finger (2 copies)	223	323	100.9	3.4e-29
g274	Pesta-scaffold00001	PF12874.2	zf-met	Zinc-finger of C2H2 type	91	115	23.9	3.2e-05
g275	Pesta-scaffold00001	PF00067.17	p450	Cytochrome P450	22	509	138.5	2.3e-40
g277	Pesta-scaffold00001	PF12937.2	F-box-like	F-box-like	16	62	28.7	7.7e-07
g279	Pesta-scaffold00001	PF00790.14	VHS	VHS domain	416	555	136.3	5.3e-40
g279	Pesta-scaffold00001	PF01363.16	FYVE	FYVE zinc finger	575	638	55.7	3.3e-15
g280	Pesta-scaffold00001	PF00443.24	UCH	Ubiquitin carboxyl-terminal hydrolase	1215	1600	105.2	3.1e-30
g280	Pesta-scaffold00001	PF00581.15	Rhodanese	Rhodanese-like domain	938	1064	21.9	0.00016
g281	Pesta-scaffold00001	PF00501.23	AMP-binding	AMP-binding enzyme	92	565	270.4	1.8e-80
g284	Pesta-scaffold00001	PF00118.19	Cpn60_TCP1	TCP-1/cpn60 chaperonin family	434	930	486.6	7.2e-146
g286	Pesta-scaffold00001	PF12110.3	Nup96	Nuclear protein 96	1483	1788	300.5	1e-89
g286	Pesta-scaffold00001	PF04096.9	Nucleoporin2	Nucleoporin autopeptidase	905	1041	149.8	4e-44
g286	Pesta-scaffold00001	PF13634.1	Nucleoporin_FG	Nucleoporin FG repeat region	498	594	43.6	2.7e-11
g289	Pesta-scaffold00001	PF13833.1	EF-hand_8	EF-hand domain pair	179	230	27.2	2.1e-06
g289	Pesta-scaffold00001	PF13405.1	EF-hand_6	EF-hand domain	71	100	24.3	1.6e-05
g290	Pesta-scaffold00001	PF00009.22	GTP_EFTU	Elongation factor Tu GTP binding domain	415	656	160	4e-47
g290	Pesta-scaffold00001	PF08938.5	HBS1_N	HBS1 N-terminus	56	143	75.8	2.1e-21
g290	Pesta-scaffold00001	PF03144.20	GTP_EFTU_D2	Elongation factor Tu domain 2	657	723	31	2e-07
g290	Pesta-scaffold00001	PF03143.12	GTP_EFTU_D3	Elongation factor Tu C-terminal domain	756	824	20.9	0.00029
g291	Pesta-scaffold00001	PF00012.15	HSP70	Hsp70 protein	44	649	879.7	6.5e-265
g292	Pesta-scaffold00001	PF10712.4	NAD-GH	NAD-specific glutamate dehydrogenase	69	582	470.6	5.7e-141
g293	Pesta-scaffold00001	PF00083.19	Sugar_tr	Sugar (and other) transporter	37	245	66	2.2e-18
g293	Pesta-scaffold00001	PF07690.11	MFS_1	Major Facilitator Superfamily	296	488	48.8	4e-13
g295	Pesta-scaffold00001	PF05648.9	PEX11	Peroxisomal biogenesis factor 11 (PEX11)	12	230	247.4	9.2e-74
g296	Pesta-scaffold00001	PF00177.16	Ribosomal_S7	Ribosomal protein S7p/S5e	100	272	83.3	1.2e-23
g299	Pesta-scaffold00001	PF00067.17	p450	Cytochrome P450	282	504	95.5	2.5e-27
g301	Pesta-scaffold00001	PF00108.18	Thiolase_N	Thiolase, N-terminal domain	29	287	255.1	4.9e-76
g301	Pesta-scaffold00001	PF02803.13	Thiolase_C	Thiolase, C-terminal domain	294	416	149.2	3.3e-44
g303	Pesta-scaffold00001	PF00484.14	Pro_CA	Carbonic anhydrase	42	194	146.2	7.2e-43
g303	Pesta-scaffold00001	PF02423.10	OCD_Mu_crystall	Ornithine cyclodeaminase/mu-crystallin family	352	521	29.1	4e-07
g307	Pesta-scaffold00001	PF01248.21	Ribosomal_L7Ae	Ribosomal protein L7Ae/L30e/S12e/Gadd45 family	189	284	73.4	7.4e-21
g308	Pesta-scaffold00001	PF01171.15	ATP_bind_3	PP-loop family	53	247	64.3	9.4e-18
g310	Pesta-scaffold00001	PF01853.13	MOZ_SAS	MOZ/SAS family	670	863	263.8	5.3e-79
g312	Pesta-scaffold00001	PF01417.15	ENTH	ENTH domain	15	139	164.8	7.2e-49
g313	Pesta-scaffold00001	PF00582.21	Usp	Universal stress protein family	565	675	45.3	9.3e-12
g317	Pesta-scaffold00001	PF00658.13	PABP	Poly-adenylate binding protein, unique domain	667	738	97	3.5e-28
g317	Pesta-scaffold00001	PF00076.17	RRM_1	RNA recognition motif. (a.k.a. RRM, RBD, or RNP domain)	240	309	77.5	4.2e-22
g317	Pesta-scaffold00001	PF14259.1	RRM_6	RNA recognition motif (a.k.a. RRM, RBD, or RNP domain)	59	129	37.5	1.6e-09
g317	Pesta-scaffold00001	PF13893.1	RRM_5	RNA recognition motif. (a.k.a. RRM, RBD, or RNP domain)	161	220	31.1	1.5e-07
g319	Pesta-scaffold00001	PF00632.20	HECT	HECT-domain (ubiquitin-transferase)	808	1147	275.8	4.3e-82
g320	Pesta-scaffold00001	PF13540.1	RCC1_2	Regulator of chromosome condensation (RCC1) repeat	344	373	33.1	2.7e-08
g320	Pesta-scaffold00001	PF13637.1	Ank_4	Ankyrin repeats (many copies)	79	137	32.2	1.1e-07
g320	Pesta-scaffold00001	PF00651.26	BTB	BTB/POZ domain	891	1013	31.4	1.4e-07
g323	Pesta-scaffold00001	PF04616.9	Glyco_hydro_43	Glycosyl hydrolases family 43	304	578	183	6e-54
g323	Pesta-scaffold00001	PF00153.22	Mito_carr	Mitochondrial carrier protein	5	102	83.1	8.4e-24
g327	Pesta-scaffold00001	PF12224.3	Amidoligase_2	Putative amidoligase enzyme	16	238	65.8	4.2e-18
g331	Pesta-scaffold00001	PF00067.17	p450	Cytochrome P450	38	497	166.2	8.6e-49
g334	Pesta-scaffold00001	PF00153.22	Mito_carr	Mitochondrial carrier protein	239	336	73.7	7e-21
g337	Pesta-scaffold00001	PF00106.20	adh_short	short chain dehydrogenase	22	212	68.9	4.7e-19
g339	Pesta-scaffold00001	PF09073.5	BUD22	BUD22	14	517	234.9	1.7e-69
g344	Pesta-scaffold00001	PF08164.7	TRAUB	Apoptosis-antagonizing transcription factor, C-terminal	481	562	100.4	4.3e-29
g344	Pesta-scaffold00001	PF13339.1	AATF-Che1	Apoptosis antagonizing transcription factor	297	411	87.1	1e-24
g346	Pesta-scaffold00001	PF10609.4	ParA	ParA/MinD ATPase like	44	124	115.7	6.1e-34
g348	Pesta-scaffold00001	PF00295.12	Glyco_hydro_28	Glycosyl hydrolases family 28	46	365	367.5	4.8e-110
g350	Pesta-scaffold00001	PF02102.10	Peptidase_M35	Deuterolysin metalloprotease (M35) family	1	353	90.8	6.2e-26
g351	Pesta-scaffold00001	PF09084.6	NMT1	NMT1/THI5 like	15	238	251.2	7.5e-75
g351	Pesta-scaffold00001	PF04082.13	Fungal_trans	Fungal specific transcription factor domain	872	1026	54.9	5.6e-15
g352	Pesta-scaffold00001	PF01494.14	FAD_binding_3	FAD binding domain	1	352	83.1	1.8e-23
g356	Pesta-scaffold00001	PF09362.5	DUF1996	Domain of unknown function (DUF1996)	1	141	159.2	1.2e-46
g357	Pesta-scaffold00001	PF00544.14	Pec_lyase_C	Pectate lyase	96	299	77.9	6.6e-22
g359	Pesta-scaffold00001	PF09362.5	DUF1996	Domain of unknown function (DUF1996)	32	137	112.5	2.3e-32
g360	Pesta-scaffold00001	PF03663.9	Glyco_hydro_76	Glycosyl hydrolase family 76	31	398	367.7	7.8e-110
g362	Pesta-scaffold00001	PF00383.17	dCMP_cyt_deam_1	Cytidine and deoxycytidylate deaminase zinc-binding region	17	121	26.6	3.3e-06
g365	Pesta-scaffold00001	PF03849.9	Tfb2	Transcription factor Tfb2	10	388	433.6	4.3e-130
g366	Pesta-scaffold00001	PF06912.6	DUF1275	Protein of unknown function (DUF1275)	49	275	130.9	3.5e-38
g368	Pesta-scaffold00001	PF07690.11	MFS_1	Major Facilitator Superfamily	89	458	114.2	5.1e-33
g370	Pesta-scaffold00001	PF07470.8	Glyco_hydro_88	Glycosyl Hydrolase Family 88	26	371	284.8	7.6e-85
g372	Pesta-scaffold00001	PF00474.12	SSF	Sodium:solute symporter family	46	463	66.5	1.7e-18
g373	Pesta-scaffold00001	PF04547.7	Anoctamin	Calcium-activated chloride channel	253	719	348.1	6.2e-104
g374	Pesta-scaffold00001	PF00076.17	RRM_1	RNA recognition motif. (a.k.a. RRM, RBD, or RNP domain)	84	120	25	1e-05
g377	Pesta-scaffold00001	PF02469.17	Fasciclin	Fasciclin domain	200	323	67.8	8.4e-19
g378	Pesta-scaffold00001	PF00722.16	Glyco_hydro_16	Glycosyl hydrolases family 16	158	408	67.9	6.4e-19
g381	Pesta-scaffold00001	PF13632.1	Glyco_trans_2_3	Glycosyl transferase family group 2	492	774	162.3	1e-47
g384	Pesta-scaffold00001	PF01758.11	SBF	Sodium Bile acid symporter family	88	284	162.1	8.8e-48
g385	Pesta-scaffold00001	PF00248.16	Aldo_ket_red	Aldo/keto reductase family	21	323	188.9	7.8e-56
g386	Pesta-scaffold00001	PF04664.8	OGFr_N	Opioid growth factor receptor (OGFr) conserved region	6	188	82.5	2.4e-23
g392	Pesta-scaffold00001	PF07250.6	Glyoxal_oxid_N	Glyoxal oxidase N-terminus	503	748	89.1	2.2e-25
g392	Pesta-scaffold00001	PF09118.6	DUF1929	Domain of unknown function (DUF1929)	886	980	81.4	3.8e-23
g392	Pesta-scaffold00001	PF01822.14	WSC	WSC domain	38	119	70.2	1e-19
g393	Pesta-scaffold00001	PF07732.10	Cu-oxidase_3	Multicopper oxidase	87	206	131	1.6e-38
g393	Pesta-scaffold00001	PF07731.9	Cu-oxidase_2	Multicopper oxidase	432	584	118.8	1.1e-34
g393	Pesta-scaffold00001	PF00394.17	Cu-oxidase	Multicopper oxidase	213	363	100.4	8.7e-29
g394	Pesta-scaffold00001	PF02146.12	SIR2	Sir2 family	43	225	181.9	8.4e-54
g398	Pesta-scaffold00001	PF01529.15	zf-DHHC	DHHC palmitoyltransferase	123	239	54.8	6.8e-15
g400	Pesta-scaffold00001	PF00106.20	adh_short	short chain dehydrogenase	27	198	71.9	5.6e-20
g404	Pesta-scaffold00001	PF06985.6	HET	Heterokaryon incompatibility protein (HET)	161	313	69.5	3e-19
g405	Pesta-scaffold00001	PF06985.6	HET	Heterokaryon incompatibility protein (HET)	57	211	70.4	1.6e-19
g408	Pesta-scaffold00001	PF00067.17	p450	Cytochrome P450	136	503	111.5	3.5e-32
g410	Pesta-scaffold00001	PF00135.23	COesterase	Carboxylesterase family	14	565	332	6.6e-99
g411	Pesta-scaffold00001	PF05426.7	Alginate_lyase	Alginate lyase	70	317	19.9	0.00036
g413	Pesta-scaffold00001	PF13385.1	Laminin_G_3	Concanavalin A-like lectin/glucanases superfamily	897	1064	57.4	1.9e-15
g413	Pesta-scaffold00001	PF00754.20	F5_F8_type_C	F5/8 type C domain	185	309	26.2	5.6e-06
g413	Pesta-scaffold00001	PF02837.13	Glyco_hydro_2_N	Glycosyl hydrolases family 2, sugar binding domain	1109	1260	23.7	2.9e-05
g414	Pesta-scaffold00001	PF01915.17	Glyco_hydro_3_C	Glycosyl hydrolase family 3 C-terminal domain	398	837	154.3	3.3e-45
g414	Pesta-scaffold00001	PF00933.16	Glyco_hydro_3	Glycosyl hydrolase family 3 N terminal domain	45	360	143	9.2e-42
g414	Pesta-scaffold00001	PF14310.1	Fn3-like	Fibronectin type III-like domain	877	947	49.5	2.9e-13
g414	Pesta-scaffold00001	PF07691.7	PA14	PA14 domain	506	662	31.8	9.1e-08
g415	Pesta-scaffold00001	PF00172.13	Zn_clus	Fungal Zn(2)-Cys(6) binuclear cluster domain	13	54	20.8	0.00025
g416	Pesta-scaffold00001	PF07690.11	MFS_1	Major Facilitator Superfamily	32	441	128.1	3.1e-37
g418	Pesta-scaffold00001	PF04828.9	GFA	Glutathione-dependent formaldehyde-activating enzyme	55	156	64.4	6.5e-18
g419	Pesta-scaffold00001	PF00856.23	SET	SET domain	155	284	43.8	3.2e-11
g423	Pesta-scaffold00001	PF01408.17	GFO_IDH_MocA	Oxidoreductase family, NAD-binding Rossmann fold	7	125	53.4	3.3e-14
g423	Pesta-scaffold00001	PF02894.12	GFO_IDH_MocA_C	Oxidoreductase family, C-terminal alpha/beta domain	141	198	25	1.2e-05
g425	Pesta-scaffold00001	PF00248.16	Aldo_ket_red	Aldo/keto reductase family	18	301	185.1	1.1e-54
g427	Pesta-scaffold00001	PF13738.1	Pyr_redox_3	Pyridine nucleotide-disulphide oxidoreductase	227	424	76.4	3e-21
g429	Pesta-scaffold00001	PF00172.13	Zn_clus	Fungal Zn(2)-Cys(6) binuclear cluster domain	14	50	21.7	0.00013
g430	Pesta-scaffold00001	PF01965.19	DJ-1_PfpI	DJ-1/PfpI family	111	285	41.8	6.9e-11
g431	Pesta-scaffold00001	PF04082.13	Fungal_trans	Fungal specific transcription factor domain	136	349	49	3.4e-13
g432	Pesta-scaffold00001	PF11951.3	Fungal_trans_2	Fungal specific transcription factor domain	221	685	39.4	2.6e-10
g432	Pesta-scaffold00001	PF00172.13	Zn_clus	Fungal Zn(2)-Cys(6) binuclear cluster domain	21	58	32.8	4.6e-08
g433	Pesta-scaffold00001	PF08240.7	ADH_N	Alcohol dehydrogenase GroES-like domain	28	134	93.7	5.3e-27
g433	Pesta-scaffold00001	PF00107.21	ADH_zinc_N	Zinc-binding dehydrogenase	174	316	65.1	4.1e-18
g434	Pesta-scaffold00001	PF00083.19	Sugar_tr	Sugar (and other) transporter	24	482	310.6	1.4e-92
g436	Pesta-scaffold00001	PF00106.20	adh_short	short chain dehydrogenase	22	194	101.7	3.9e-29
g438	Pesta-scaffold00001	PF02837.13	Glyco_hydro_2_N	Glycosyl hydrolases family 2, sugar binding domain	27	188	96.6	1.1e-27
g438	Pesta-scaffold00001	PF00703.16	Glyco_hydro_2	Glycosyl hydrolases family 2	203	312	51.1	1.5e-13
g438	Pesta-scaffold00001	PF00754.20	F5_F8_type_C	F5/8 type C domain	839	946	36	5.1e-09
g439	Pesta-scaffold00001	PF06985.6	HET	Heterokaryon incompatibility protein (HET)	143	300	83.9	1.1e-23
g440	Pesta-scaffold00001	PF00083.19	Sugar_tr	Sugar (and other) transporter	53	503	226.4	4.8e-67
g441	Pesta-scaffold00001	PF00135.23	COesterase	Carboxylesterase family	6	549	310	3e-92
g442	Pesta-scaffold00001	PF06985.6	HET	Heterokaryon incompatibility protein (HET)	48	198	100.5	8.3e-29
g444	Pesta-scaffold00001	PF00503.15	G-alpha	G-protein alpha subunit	224	607	210.1	3.8e-62
g448	Pesta-scaffold00001	PF13520.1	AA_permease_2	Amino acid permease	46	515	199.3	7.5e-59
g449	Pesta-scaffold00001	PF04828.9	GFA	Glutathione-dependent formaldehyde-activating enzyme	43	126	52.2	4.3e-14
g450	Pesta-scaffold00001	PF00295.12	Glyco_hydro_28	Glycosyl hydrolases family 28	1130	1485	158.8	1.5e-46
g450	Pesta-scaffold00001	PF00145.12	DNA_methylase	C-5 cytosine-specific DNA methylase	316	437	47.8	1.1e-12
g452	Pesta-scaffold00001	PF01095.14	Pectinesterase	Pectinesterase	169	398	57.2	9.4e-16
g454	Pesta-scaffold00001	PF01301.14	Glyco_hydro_35	Glycosyl hydrolases family 35	103	438	296.9	1.8e-88
g454	Pesta-scaffold00001	PF10435.4	BetaGal_dom2	Beta-galactosidase, domain 2	444	624	175.1	8.8e-52
g454	Pesta-scaffold00001	PF13364.1	BetaGal_dom4_5	Beta-galactosidase jelly roll domain	726	838	96.6	1e-27
g454	Pesta-scaffold00001	PF13363.1	BetaGal_dom3	Beta-galactosidase, domain 3	616	693	43	2.1e-11
g455	Pesta-scaffold00001	PF01979.15	Amidohydro_1	Amidohydrolase family	62	397	71.3	1e-19
g457	Pesta-scaffold00001	PF05833.6	FbpA	Fibronectin-binding protein A N-terminus (FbpA)	6	544	122.1	2.1e-35
g457	Pesta-scaffold00001	PF11923.3	DUF3441	Domain of unknown function (DUF3441)	924	1042	117.5	2.1e-34
g457	Pesta-scaffold00001	PF05670.8	DUF814	Domain of unknown function (DUF814)	553	656	78.3	2.9e-22
g458	Pesta-scaffold00001	PF01287.15	eIF-5a	Eukaryotic elongation factor 5A hypusine, DNA-binding OB fold	471	537	23.3	4.3e-05
g460	Pesta-scaffold00001	PF03051.10	Peptidase_C1_2	Peptidase C1-like family	59	513	496.5	4.9e-149
g468	Pesta-scaffold00001	PF06985.6	HET	Heterokaryon incompatibility protein (HET)	73	205	97.4	7.1e-28
g469	Pesta-scaffold00001	PF03211.8	Pectate_lyase	Pectate lyase	30	238	223.2	2.3e-66
g474	Pesta-scaffold00001	PF00933.16	Glyco_hydro_3	Glycosyl hydrolase family 3 N terminal domain	14	278	280	1.8e-83
g474	Pesta-scaffold00001	PF01915.17	Glyco_hydro_3_C	Glycosyl hydrolase family 3 C-terminal domain	313	693	196.8	3.3e-58
g474	Pesta-scaffold00001	PF14310.1	Fn3-like	Fibronectin type III-like domain	748	818	69.7	1.4e-19
g477	Pesta-scaffold00001	PF00171.17	Aldedh	Aldehyde dehydrogenase family	77	548	384.6	4.3e-115
g479	Pesta-scaffold00001	PF00122.15	E1-E2_ATPase	E1-E2 ATPase	340	610	44.8	7.2e-12
g479	Pesta-scaffold00001	PF13246.1	Hydrolase_like2	Putative hydrolase of sodium-potassium ATPase alpha subunit	753	855	44.4	1.1e-11
g484	Pesta-scaffold00001	PF01991.13	vATP-synt_E	ATP synthase (E/31 kDa) subunit	22	220	209.9	2.1e-62
g485	Pesta-scaffold00001	PF05653.9	Mg_trans_NIPA	Magnesium transporter NIPA	244	551	56.2	2.5e-15
g487	Pesta-scaffold00001	PF00270.24	DEAD	DEAD/DEAH box helicase	152	344	138.2	1.7e-40
g487	Pesta-scaffold00001	PF00271.26	Helicase_C	Helicase conserved C-terminal domain	411	492	72.2	2.2e-20
g489	Pesta-scaffold00001	PF12333.3	Ipi1_N	Rix1 complex component involved in 60S ribosome maturation	126	237	56.4	2.2e-15
g490	Pesta-scaffold00001	PF03259.12	Robl_LC7	Roadblock/LC7 domain	79	142	31.7	7.9e-08
g496	Pesta-scaffold00001	PF01544.13	CorA	CorA-like Mg2+ transporter protein	195	476	53.2	2.2e-14
g499	Pesta-scaffold00001	PF08613.6	Cyclin	Cyclin	14	262	52.1	8.6e-14
g502	Pesta-scaffold00001	PF00270.24	DEAD	DEAD/DEAH box helicase	73	244	128.1	2.2e-37
g502	Pesta-scaffold00001	PF00271.26	Helicase_C	Helicase conserved C-terminal domain	311	388	79	1.8e-22
g504	Pesta-scaffold00001	PF04032.11	Rpr2	RNAse P Rpr2/Rpp21/SNM1 subunit domain	17	140	80.6	5.4e-23
g505	Pesta-scaffold00001	PF00201.13	UDPGT	UDP-glucoronosyl and UDP-glucosyl transferase	187	441	22.2	4.3e-05
g507	Pesta-scaffold00001	PF02558.11	ApbA	Ketopantoate reductase PanE/ApbA	9	167	89.4	1.4e-25
g507	Pesta-scaffold00001	PF08546.6	ApbA_C	Ketopantoate reductase PanE/ApbA C terminal	199	322	65.8	3.4e-18
g509	Pesta-scaffold00001	PF00106.20	adh_short	short chain dehydrogenase	3	120	39.9	3.7e-10
g509	Pesta-scaffold00001	PF13561.1	adh_short_C2	Enoyl-(Acyl carrier protein) reductase	148	304	35.4	9.1e-09
g510	Pesta-scaffold00001	PF00199.14	Catalase	Catalase	97	475	448.7	1.2e-134
g510	Pesta-scaffold00001	PF06628.7	Catalase-rel	Catalase-related immune-responsive	489	556	30.2	2.8e-07
g514	Pesta-scaffold00001	PF00150.13	Cellulase	Cellulase (glycosyl hydrolase family 5)	52	321	173.1	6.7e-51
g517	Pesta-scaffold00001	PF04488.10	Gly_transf_sug	Glycosyltransferase sugar-binding region containing DXD motif	150	247	29.9	5.3e-07
g519	Pesta-scaffold00001	PF00067.17	p450	Cytochrome P450	107	450	160.3	5.5e-47
g520	Pesta-scaffold00001	PF08659.5	KR	KR domain	875	1057	178.1	1.3e-52
g520	Pesta-scaffold00001	PF00107.21	ADH_zinc_N	Zinc-binding dehydrogenase	670	810	49	3.9e-13
g520	Pesta-scaffold00001	PF08240.7	ADH_N	Alcohol dehydrogenase GroES-like domain	550	648	28.9	7.1e-07
g523	Pesta-scaffold00001	PF00106.20	adh_short	short chain dehydrogenase	42	192	58.8	6e-16
g525	Pesta-scaffold00001	PF01565.18	FAD_binding_4	FAD binding domain	69	205	83.1	1.2e-23
g525	Pesta-scaffold00001	PF08031.7	BBE	Berberine and berberine like	449	492	36.2	4.1e-09
g526	Pesta-scaffold00001	PF00067.17	p450	Cytochrome P450	71	313	127.3	5.7e-37
g527	Pesta-scaffold00001	PF00067.17	p450	Cytochrome P450	49	480	203	5.9e-60
g528	Pesta-scaffold00001	PF14420.1	Clr5	Clr5 domain	17	70	56.1	2.4e-15
g531	Pesta-scaffold00001	PF06985.6	HET	Heterokaryon incompatibility protein (HET)	158	310	77.6	9.6e-22
g533	Pesta-scaffold00001	PF01425.16	Amidase	Amidase	88	548	242.8	6.2e-72
g535	Pesta-scaffold00001	PF09811.4	Yae1_N	Essential protein Yae1, N terminal	74	112	48.3	4.9e-13
g539	Pesta-scaffold00001	PF09496.5	CENP-O	Cenp-O kinetochore centromere component	111	203	75.4	3e-21
g540	Pesta-scaffold00001	PF13000.2	Acatn	Acetyl-coenzyme A transporter 1	87	301	258.3	1.2e-76
g545	Pesta-scaffold00001	PF00657.17	Lipase_GDSL	GDSL-like Lipase/Acylhydrolase	62	247	56.3	3.8e-15
g545	Pesta-scaffold00001	PF13517.1	VCBS	Repeat domain in Vibrio, Colwellia, Bradyrhizobium and Shewanella	383	450	44.2	1.8e-11
g547	Pesta-scaffold00001	PF04127.10	DFP	DNA / pantothenate metabolism flavoprotein	94	170	24.2	2.1e-05
g550	Pesta-scaffold00001	PF00069.20	Pkinase	Protein kinase domain	270	573	196.5	4.2e-58
g550	Pesta-scaffold00001	PF00433.19	Pkinase_C	Protein kinase C terminal domain	591	647	26.1	8.8e-06
g553	Pesta-scaffold00001	PF09429.5	Wbp11	WW domain binding protein 11	4	82	81.7	2.7e-23
g555	Pesta-scaffold00001	PF07690.11	MFS_1	Major Facilitator Superfamily	82	426	126.4	1e-36
g556	Pesta-scaffold00001	PF11710.3	Git3	G protein-coupled glucose receptor regulating Gpa2	36	261	42.9	3.7e-11
g560	Pesta-scaffold00001	PF00063.16	Myosin_head	Myosin head (motor domain)	174	854	828.2	4.3e-249
g560	Pesta-scaffold00001	PF02736.14	Myosin_N	Myosin N-terminal SH3-like domain	120	162	22.2	7.8e-05
g562	Pesta-scaffold00001	PF00106.20	adh_short	short chain dehydrogenase	8	109	31.8	1.2e-07
g564	Pesta-scaffold00001	PF01926.18	MMR_HSR1	50S ribosome-binding GTPase	187	300	43.8	2.1e-11
g569	Pesta-scaffold00001	PF00628.24	PHD	PHD-finger	150	196	32	7.1e-08
g571	Pesta-scaffold00001	PF12900.2	Pyridox_ox_2	Pyridoxamine 5'-phosphate oxidase	26	195	112	2e-32
g572	Pesta-scaffold00001	PF01237.13	Oxysterol_BP	Oxysterol-binding protein	858	1232	429.6	5.7e-129
g572	Pesta-scaffold00001	PF00169.24	PH	PH domain	392	486	46.1	4.3e-12
g572	Pesta-scaffold00001	PF12796.2	Ank_2	Ankyrin repeats (3 copies)	118	225	43.9	2.2e-11
g572	Pesta-scaffold00001	PF00023.25	Ank	Ankyrin repeat	301	332	17.2	0.003
g574	Pesta-scaffold00001	PF01039.17	Carboxyl_trans	Carboxyl transferase domain	97	569	472.2	1.4e-141
g575	Pesta-scaffold00001	PF00441.19	Acyl-CoA_dh_1	Acyl-CoA dehydrogenase, C-terminal domain	771	920	138.3	2e-40
g575	Pesta-scaffold00001	PF02771.11	Acyl-CoA_dh_N	Acyl-CoA dehydrogenase, N-terminal domain	547	660	103.3	1.1e-29
g575	Pesta-scaffold00001	PF02770.14	Acyl-CoA_dh_M	Acyl-CoA dehydrogenase, middle domain	664	715	68.9	1.8e-19
g577	Pesta-scaffold00001	PF13561.1	adh_short_C2	Enoyl-(Acyl carrier protein) reductase	96	345	86.7	1.9e-24
g581	Pesta-scaffold00001	PF06283.6	ThuA	Trehalose utilisation	9	244	213.5	2.8e-63
g584	Pesta-scaffold00001	PF10528.4	PA14_2	GLEYA domain	1054	1164	75.8	2.4e-21
g587	Pesta-scaffold00001	PF13738.1	Pyr_redox_3	Pyridine nucleotide-disulphide oxidoreductase	10	221	91.2	8.8e-26
g588	Pesta-scaffold00001	PF08240.7	ADH_N	Alcohol dehydrogenase GroES-like domain	32	151	83.4	8.6e-24
g588	Pesta-scaffold00001	PF00107.21	ADH_zinc_N	Zinc-binding dehydrogenase	195	342	48	8.3e-13
g590	Pesta-scaffold00001	PF00456.16	Transketolase_N	Transketolase, thiamine diphosphate binding domain	38	375	358.4	2.7e-107
g590	Pesta-scaffold00001	PF02779.19	Transket_pyr	Transketolase, pyrimidine binding domain	392	567	117.5	4.2e-34
g590	Pesta-scaffold00001	PF02780.15	Transketolase_C	Transketolase, C-terminal domain	581	692	36.7	3.3e-09
g591	Pesta-scaffold00001	PF00106.20	adh_short	short chain dehydrogenase	26	202	88.5	4.5e-25
g593	Pesta-scaffold00001	PF00083.19	Sugar_tr	Sugar (and other) transporter	64	536	375.3	3.4e-112
g594	Pesta-scaffold00001	PF04082.13	Fungal_trans	Fungal specific transcription factor domain	301	559	65.7	2.8e-18
g594	Pesta-scaffold00001	PF00172.13	Zn_clus	Fungal Zn(2)-Cys(6) binuclear cluster domain	19	57	38.1	1e-09
g595	Pesta-scaffold00001	PF00171.17	Aldedh	Aldehyde dehydrogenase family	32	487	530.3	2.9e-159
g597	Pesta-scaffold00001	PF07690.11	MFS_1	Major Facilitator Superfamily	64	433	104.7	3.9e-30
g599	Pesta-scaffold00001	PF04082.13	Fungal_trans	Fungal specific transcription factor domain	146	403	85.8	2e-24
g601	Pesta-scaffold00001	PF00083.19	Sugar_tr	Sugar (and other) transporter	20	480	307.1	1.6e-91
g604	Pesta-scaffold00001	PF02800.15	Gp_dh_C	Glyceraldehyde 3-phosphate dehydrogenase, C-terminal domain	171	328	180.9	1.1e-53
g604	Pesta-scaffold00001	PF00044.19	Gp_dh_N	Glyceraldehyde 3-phosphate dehydrogenase, NAD binding domain	12	166	151.3	1.7e-44
g607	Pesta-scaffold00001	PF00857.15	Isochorismatase	Isochorismatase family	17	202	79.5	2.6e-22
g609	Pesta-scaffold00001	PF01565.18	FAD_binding_4	FAD binding domain	73	195	88.8	2.1e-25
g609	Pesta-scaffold00001	PF02913.14	FAD-oxidase_C	FAD linked oxidases, C-terminal domain	231	379	76	2.6e-21
g610	Pesta-scaffold00001	PF00155.16	Aminotran_1_2	Aminotransferase class I and II	1	188	71	8.1e-20
g611	Pesta-scaffold00001	PF00067.17	p450	Cytochrome P450	297	434	119.7	1.1e-34
g612	Pesta-scaffold00001	PF05199.8	GMC_oxred_C	GMC oxidoreductase	340	481	121.7	2.7e-35
g612	Pesta-scaffold00001	PF00732.14	GMC_oxred_N	GMC oxidoreductase	31	208	72.6	2.9e-20
g613	Pesta-scaffold00001	PF12706.2	Lactamase_B_2	Beta-lactamase superfamily domain	28	223	52.4	4.5e-14
g614	Pesta-scaffold00001	PF10067.4	DUF2306	Predicted membrane protein (DUF2306)	97	200	45.6	5.8e-12
g616	Pesta-scaffold00001	PF07690.11	MFS_1	Major Facilitator Superfamily	38	449	124	5.2e-36
g617	Pesta-scaffold00001	PF03959.8	FSH1	Serine hydrolase (FSH1)	1	207	103.6	9.5e-30
g618	Pesta-scaffold00001	PF00109.21	ketoacyl-synt	Beta-ketoacyl synthase, N-terminal domain	19	283	217.8	1.5e-64
g618	Pesta-scaffold00001	PF08659.5	KR	KR domain	2307	2486	203.1	2.7e-60
g618	Pesta-scaffold00001	PF14765.1	PS-DH	Polyketide synthase dehydratase	1059	1375	163.3	6.5e-48
g618	Pesta-scaffold00001	PF00698.16	Acyl_transf_1	Acyl transferase domain	656	1008	159.8	9.6e-47
g618	Pesta-scaffold00001	PF02801.17	Ketoacyl-synt_C	Beta-ketoacyl synthase, C-terminal domain	291	408	107.3	3.9e-31
g618	Pesta-scaffold00001	PF00107.21	ADH_zinc_N	Zinc-binding dehydrogenase	2108	2240	73.8	8.8e-21
g618	Pesta-scaffold00001	PF08242.7	Methyltransf_12	Methyltransferase domain	1570	1678	33.6	4e-08
g618	Pesta-scaffold00001	PF00550.20	PP-binding	Phosphopantetheine attachment site	2604	2670	24.2	2.9e-05
g618	Pesta-scaffold00001	PF08240.7	ADH_N	Alcohol dehydrogenase GroES-like domain	1991	2100	23.2	4.3e-05
g619	Pesta-scaffold00001	PF07690.11	MFS_1	Major Facilitator Superfamily	82	481	139.5	1e-40
g623	Pesta-scaffold00001	PF02678.11	Pirin	Pirin	90	216	88.1	3e-25
g624	Pesta-scaffold00001	PF00310.16	GATase_2	Glutamine amidotransferases class-II	65	223	62.8	2.2e-17
g624	Pesta-scaffold00001	PF00156.22	Pribosyltran	Phosphoribosyl transferase domain	282	412	42.3	5.4e-11
g626	Pesta-scaffold00001	PF13622.1	4HBT_3	Thioesterase-like superfamily	40	329	149.2	1.7e-43
g627	Pesta-scaffold00001	PF00172.13	Zn_clus	Fungal Zn(2)-Cys(6) binuclear cluster domain	72	110	34.4	1.5e-08
g629	Pesta-scaffold00001	PF00730.20	HhH-GPD	HhH-GPD superfamily base excision DNA repair protein	297	492	43.7	2.6e-11
g630	Pesta-scaffold00001	PF12726.2	SEN1_N	SEN1 N terminal	89	832	486.8	9e-146
g630	Pesta-scaffold00001	PF13086.1	AAA_11	AAA domain	1315	1604	231.5	9.5e-69
g630	Pesta-scaffold00001	PF13087.1	AAA_12	AAA domain	1611	1808	204.3	1.2e-60
g633	Pesta-scaffold00001	PF07690.11	MFS_1	Major Facilitator Superfamily	43	422	128.3	2.7e-37
g634	Pesta-scaffold00001	PF07690.11	MFS_1	Major Facilitator Superfamily	517	897	120.7	5.5e-35
g636	Pesta-scaffold00001	PF02668.11	TauD	Taurine catabolism dioxygenase TauD, TfdA family	71	345	165.1	2.2e-48
g637	Pesta-scaffold00001	PF04082.13	Fungal_trans	Fungal specific transcription factor domain	180	385	105.5	2.1e-30
g639	Pesta-scaffold00001	PF00701.17	DHDPS	Dihydrodipicolinate synthetase family	7	316	134.6	2.5e-39
g641	Pesta-scaffold00001	PF02668.11	TauD	Taurine catabolism dioxygenase TauD, TfdA family	54	332	160.8	4.7e-47
g642	Pesta-scaffold00001	PF00656.17	Peptidase_C14	Caspase domain	140	430	244.3	1.4e-72
g643	Pesta-scaffold00001	PF07690.11	MFS_1	Major Facilitator Superfamily	77	433	87.7	5.8e-25
g644	Pesta-scaffold00001	PF00501.23	AMP-binding	AMP-binding enzyme	2717	3116	304.6	7.4e-91
g644	Pesta-scaffold00001	PF00668.15	Condensation	Condensation domain	2273	2562	111.4	3.5e-32
g644	Pesta-scaffold00001	PF00550.20	PP-binding	Phosphopantetheine attachment site	1609	1675	40.1	3.1e-10
g644	Pesta-scaffold00001	PF13193.1	AMP-binding_C	AMP-binding enzyme C-terminal domain	1481	1570	24	5.5e-05
g646	Pesta-scaffold00001	PF13434.1	K_oxygenase	L-lysine 6-monooxygenase (NADPH-requiring)	38	401	358.3	3.2e-107
g648	Pesta-scaffold00001	PF14856.1	Hce2	Pathogen effector; putative necrosis-inducing factor	91	205	63.2	1.5e-17
g650	Pesta-scaffold00001	PF00067.17	p450	Cytochrome P450	41	487	214.9	1.5e-63
g651	Pesta-scaffold00001	PF05347.10	Complex1_LYR	Complex 1 protein (LYR family)	185	251	38.9	5.4e-10
g654	Pesta-scaffold00001	PF00179.21	UQ_con	Ubiquitin-conjugating enzyme	9	138	57.8	7.3e-16
g655	Pesta-scaffold00001	PF12783.2	Sec7_N	Guanine nucleotide exchange factor in Golgi transport N-terminal	196	354	114.1	4.2e-33
g656	Pesta-scaffold00001	PF01145.20	Band_7	SPFH domain / Band 7 family	74	246	109.1	2.2e-31
g657	Pesta-scaffold00001	PF00170.16	bZIP_1	bZIP transcription factor	77	134	24.8	1.5e-05
g659	Pesta-scaffold00001	PF00069.20	Pkinase	Protein kinase domain	66	380	100.1	1.1e-28
g660	Pesta-scaffold00001	PF10342.4	GPI-anchored	Ser-Thr-rich glycosyl-phosphatidyl-inositol-anchored membrane family	28	120	62	5.5e-17
g671	Pesta-scaffold00001	PF00854.16	PTR2	POT family	163	342	51.9	4.6e-14
g674	Pesta-scaffold00001	PF03595.12	SLAC1	Voltage-dependent anion channel	54	415	168.7	1.3e-49
g675	Pesta-scaffold00001	PF00270.24	DEAD	DEAD/DEAH box helicase	73	254	63	2.2e-17
g675	Pesta-scaffold00001	PF00271.26	Helicase_C	Helicase conserved C-terminal domain	318	395	57.4	9.1e-16
g678	Pesta-scaffold00001	PF12224.3	Amidoligase_2	Putative amidoligase enzyme	13	352	67.6	1.2e-18
g680	Pesta-scaffold00001	PF13302.1	Acetyltransf_3	Acetyltransferase (GNAT) domain	16	176	46.1	5.3e-12
g685	Pesta-scaffold00001	PF00646.28	F-box	F-box domain	463	509	40.5	1.4e-10
g685	Pesta-scaffold00001	PF00400.27	WD40	WD domain, G-beta repeat	824	859	35.8	4.5e-09
g688	Pesta-scaffold00001	PF00067.17	p450	Cytochrome P450	58	522	215.6	9.4e-64
g690	Pesta-scaffold00001	PF01565.18	FAD_binding_4	FAD binding domain	40	175	108.2	2.2e-31
g690	Pesta-scaffold00001	PF08031.7	BBE	Berberine and berberine like	421	469	32.7	4.9e-08
g692	Pesta-scaffold00001	PF12224.3	Amidoligase_2	Putative amidoligase enzyme	110	305	42.9	4.1e-11
g693	Pesta-scaffold00001	PF14856.1	Hce2	Pathogen effector; putative necrosis-inducing factor	79	186	44.8	8.3e-12
g694	Pesta-scaffold00001	PF01757.17	Acyl_transf_3	Acyltransferase family	37	440	107.1	8e-31
g695	Pesta-scaffold00001	PF04502.8	DUF572	Family of unknown function (DUF572)	4	351	195	1.8e-57
g700	Pesta-scaffold00001	PF00179.21	UQ_con	Ubiquitin-conjugating enzyme	20	152	118	1.9e-34
g703	Pesta-scaffold00001	PF13382.1	Adenine_deam_C	Adenine deaminase C-terminal domain	434	605	145.4	8.4e-43
g703	Pesta-scaffold00001	PF01979.15	Amidohydro_1	Amidohydrolase family	90	355	61.5	1e-16
g704	Pesta-scaffold00001	PF02133.10	Transp_cyt_pur	Permease for cytosine/purines, uracil, thiamine, allantoin	58	506	334.6	6.9e-100
g706	Pesta-scaffold00001	PF07690.11	MFS_1	Major Facilitator Superfamily	49	364	92.2	2.4e-26
g708	Pesta-scaffold00001	PF07690.11	MFS_1	Major Facilitator Superfamily	50	441	107.3	6.4e-31
g712	Pesta-scaffold00001	PF01062.16	Bestrophin	Bestrophin, RFP-TM, chloride channel	280	439	89.5	1.7e-25
g719	Pesta-scaffold00001	PF07995.6	GSDH	Glucose / Sorbosone dehydrogenase	106	287	31.6	8.4e-08
g721	Pesta-scaffold00001	PF00854.16	PTR2	POT family	179	549	102.8	1.6e-29
g723	Pesta-scaffold00001	PF13147.1	Amidohydro_4	Amidohydrolase	50	409	78.2	9.9e-22
g725	Pesta-scaffold00001	PF00026.18	Asp	Eukaryotic aspartyl protease	101	448	140.1	9.2e-41
g726	Pesta-scaffold00001	PF01846.14	FF	FF domain	682	733	48.2	7.1e-13
g726	Pesta-scaffold00001	PF00397.21	WW	WW domain	376	405	34.7	1.1e-08
g727	Pesta-scaffold00001	PF01738.13	DLH	Dienelactone hydrolase family	31	249	92.1	2.8e-26
g730	Pesta-scaffold00001	PF06110.6	DUF953	Eukaryotic protein of unknown function (DUF953)	50	158	69.7	1.3e-19
g732	Pesta-scaffold00001	PF01569.16	PAP2	PAP2 superfamily	107	257	79	2.2e-22
g733	Pesta-scaffold00001	PF00350.18	Dynamin_N	Dynamin family	159	393	72.9	2.5e-20
g733	Pesta-scaffold00001	PF01031.15	Dynamin_M	Dynamin central region	404	552	37.9	8.1e-10
g734	Pesta-scaffold00001	PF00083.19	Sugar_tr	Sugar (and other) transporter	43	502	276.5	3e-82
g736	Pesta-scaffold00001	PF00067.17	p450	Cytochrome P450	203	538	97.5	6.2e-28
g738	Pesta-scaffold00001	PF01328.12	Peroxidase_2	Peroxidase, family 2	3	264	147.8	2.8e-43
g740	Pesta-scaffold00001	PF04185.9	Phosphoesterase	Phosphoesterase family	62	306	71.4	7.7e-20
g741	Pesta-scaffold00001	PF07690.11	MFS_1	Major Facilitator Superfamily	842	1212	107.3	6.5e-31
g741	Pesta-scaffold00001	PF13561.1	adh_short_C2	Enoyl-(Acyl carrier protein) reductase	22	262	102.4	3.1e-29
g742	Pesta-scaffold00001	PF00106.20	adh_short	short chain dehydrogenase	39	189	50.9	1.5e-13
g743	Pesta-scaffold00001	PF01244.16	Peptidase_M19	Membrane dipeptidase (Peptidase family M19)	9	330	232.3	6.3e-69
g746	Pesta-scaffold00001	PF12697.2	Abhydrolase_6	Alpha/beta hydrolase family	5	232	83.9	1.5e-23
g754	Pesta-scaffold00001	PF06985.6	HET	Heterokaryon incompatibility protein (HET)	469	607	87	1.2e-24
g754	Pesta-scaffold00001	PF10445.4	DUF2456	Protein of unknown function (DUF2456)	138	235	26.4	4.7e-06
g757	Pesta-scaffold00001	PF01095.14	Pectinesterase	Pectinesterase	26	311	151.6	1.6e-44
g759	Pesta-scaffold00001	PF00180.15	Iso_dh	Isocitrate/isopropylmalate dehydrogenase	7	354	291.3	8.2e-87
g761	Pesta-scaffold00001	PF12697.2	Abhydrolase_6	Alpha/beta hydrolase family	35	293	92.3	3.8e-26
g762	Pesta-scaffold00001	PF04082.13	Fungal_trans	Fungal specific transcription factor domain	125	419	82.2	2.6e-23
g764	Pesta-scaffold00001	PF00890.19	FAD_binding_2	FAD binding domain	15	549	310.8	1.3e-92
g768	Pesta-scaffold00001	PF01494.14	FAD_binding_3	FAD binding domain	287	368	40	2.4e-10
g769	Pesta-scaffold00001	PF03443.9	Glyco_hydro_61	Glycosyl hydrolase family 61	20	240	222.7	4.5e-66
g772	Pesta-scaffold00001	PF07859.8	Abhydrolase_3	alpha/beta hydrolase fold	77	285	154.3	3.2e-45
g776	Pesta-scaffold00001	PF07992.9	Pyr_redox_2	Pyridine nucleotide-disulphide oxidoreductase	12	343	45.7	6.5e-12
g777	Pesta-scaffold00001	PF08240.7	ADH_N	Alcohol dehydrogenase GroES-like domain	42	154	92.6	1.2e-26
g777	Pesta-scaffold00001	PF00107.21	ADH_zinc_N	Zinc-binding dehydrogenase	196	327	77.5	6e-22
g779	Pesta-scaffold00001	PF07690.11	MFS_1	Major Facilitator Superfamily	68	452	117	7.1e-34
g781	Pesta-scaffold00001	PF12511.3	DUF3716	Protein of unknown function (DUF3716)	141	190	26.5	3.5e-06
g782	Pesta-scaffold00001	PF00172.13	Zn_clus	Fungal Zn(2)-Cys(6) binuclear cluster domain	49	85	39.9	2.7e-10
g782	Pesta-scaffold00001	PF04082.13	Fungal_trans	Fungal specific transcription factor domain	252	421	38	7.8e-10
g785	Pesta-scaffold00001	PF03211.8	Pectate_lyase	Pectate lyase	102	322	229.9	2.1e-68
g787	Pesta-scaffold00001	PF00484.14	Pro_CA	Carbonic anhydrase	32	164	97	9.8e-28
g788	Pesta-scaffold00001	PF06500.6	DUF1100	Alpha/beta hydrolase of unknown function (DUF1100)	77	400	50.2	1.4e-13
g790	Pesta-scaffold00001	PF13561.1	adh_short_C2	Enoyl-(Acyl carrier protein) reductase	12	252	116.3	1.8e-33
g791	Pesta-scaffold00001	PF12511.3	DUF3716	Protein of unknown function (DUF3716)	107	159	30.6	1.9e-07
g793	Pesta-scaffold00001	PF05346.6	DUF747	Eukaryotic membrane protein family	560	971	435.9	8.3e-131
g794	Pesta-scaffold00001	PF01083.17	Cutinase	Cutinase	65	243	161	2.2e-47
g797	Pesta-scaffold00001	PF13278.1	DUF4066	Putative amidotransferase	14	183	108.2	2.4e-31
g799	Pesta-scaffold00001	PF01757.17	Acyl_transf_3	Acyltransferase family	78	450	106.7	1e-30
g802	Pesta-scaffold00001	PF00005.22	ABC_tran	ABC transporter	1254	1435	79.7	2.4e-22
g802	Pesta-scaffold00001	PF00664.18	ABC_membrane	ABC transporter transmembrane region	905	1192	59.9	2.4e-16
g805	Pesta-scaffold00001	PF04163.7	Tht1	Tht1-like nuclear fusion protein	49	416	31.6	5.6e-08
g806	Pesta-scaffold00001	PF00347.18	Ribosomal_L6	Ribosomal protein L6	163	247	45	1.1e-11
g809	Pesta-scaffold00001	PF00459.20	Inositol_P	Inositol monophosphatase family	105	452	181.8	1.5e-53
g811	Pesta-scaffold00001	PF07967.8	zf-C3HC	C3HC zinc finger-like	141	281	112.8	9.5e-33
g811	Pesta-scaffold00001	PF08600.5	Rsm1	Rsm1-like	322	421	83.8	5.6e-24
g812	Pesta-scaffold00001	PF00122.15	E1-E2_ATPase	E1-E2 ATPase	322	564	168.7	9.8e-50
g812	Pesta-scaffold00001	PF00702.21	Hydrolase	haloacid dehalogenase-like hydrolase	568	805	131.2	6.9e-38
g812	Pesta-scaffold00001	PF00403.21	HMA	Heavy-metal-associated domain	7	68	47	2e-12
g814	Pesta-scaffold00001	PF00445.13	Ribonuclease_T2	Ribonuclease T2 family	43	259	151.7	1.7e-44
g815	Pesta-scaffold00001	PF03810.14	IBN_N	Importin-beta N-terminal domain	39	106	32.8	4.8e-08
g815	Pesta-scaffold00001	PF13513.1	HEAT_EZ	HEAT-like repeat	375	427	26.7	5.2e-06
g817	Pesta-scaffold00001	PF06220.7	zf-U1	U1 zinc finger	8	44	28.8	6.4e-07
g820	Pesta-scaffold00001	PF00399.14	PIR	Yeast PIR protein repeat	206	220	24.7	9.7e-06
g823	Pesta-scaffold00001	PF00544.14	Pec_lyase_C	Pectate lyase	77	264	150.3	4.3e-44
g825	Pesta-scaffold00001	PF00962.17	A_deaminase	Adenosine/AMP deaminase	159	634	141.6	2.6e-41
g830	Pesta-scaffold00001	PF00069.20	Pkinase	Protein kinase domain	4	307	242.1	5.2e-72
g831	Pesta-scaffold00001	PF13532.1	2OG-FeII_Oxy_2	2OG-Fe(II) oxygenase superfamily	148	344	108.9	2.7e-31
g832	Pesta-scaffold00001	PF00657.17	Lipase_GDSL	GDSL-like Lipase/Acylhydrolase	30	279	27.5	2.4e-06
g835	Pesta-scaffold00001	PF00134.18	Cyclin_N	Cyclin, N-terminal domain	54	189	51.1	8.6e-14
g838	Pesta-scaffold00001	PF05022.7	SRP40_C	SRP40, C-terminal domain	394	462	83.1	1.4e-23
g839	Pesta-scaffold00001	PF05648.9	PEX11	Peroxisomal biogenesis factor 11 (PEX11)	6	305	55.3	5.3e-15
g842	Pesta-scaffold00001	PF00300.17	His_Phos_1	Histidine phosphatase superfamily (branch 1)	4	171	63.2	2.8e-17
g846	Pesta-scaffold00001	PF03095.10	PTPA	Phosphotyrosyl phosphate activator (PTPA) protein	31	376	347.9	4.2e-104
g853	Pesta-scaffold00001	PF01412.13	ArfGap	Putative GTPase activating protein for Arf	17	130	136.6	3.1e-40
g855	Pesta-scaffold00001	PF04366.7	DUF500	Family of unknown function (DUF500)	85	213	149.7	2.5e-44
g855	Pesta-scaffold00001	PF00018.23	SH3_1	SH3 domain	295	342	45.2	4.2e-12
g857	Pesta-scaffold00001	PF00067.17	p450	Cytochrome P450	49	501	252.2	7e-75
g858	Pesta-scaffold00001	PF00225.18	Kinesin	Kinesin motor domain	43	385	190.3	3.5e-56
g860	Pesta-scaffold00001	PF09362.5	DUF1996	Domain of unknown function (DUF1996)	44	303	210.3	3.1e-62
g865	Pesta-scaffold00001	PF08240.7	ADH_N	Alcohol dehydrogenase GroES-like domain	37	141	54.9	6e-15
g871	Pesta-scaffold00001	PF07632.6	DUF1593	Protein of unknown function (DUF1593)	40	302	273.9	1.1e-81
g872	Pesta-scaffold00001	PF13622.1	4HBT_3	Thioesterase-like superfamily	63	337	99.4	2.6e-28
g873	Pesta-scaffold00001	PF13602.1	ADH_zinc_N_2	Zinc-binding dehydrogenase	198	331	83.6	2e-23
g875	Pesta-scaffold00001	PF07690.11	MFS_1	Major Facilitator Superfamily	175	542	110.2	8.5e-32
g876	Pesta-scaffold00001	PF06985.6	HET	Heterokaryon incompatibility protein (HET)	51	220	111.9	2.4e-32
g878	Pesta-scaffold00001	PF13520.1	AA_permease_2	Amino acid permease	49	501	168.6	1.6e-49
g879	Pesta-scaffold00001	PF01179.15	Cu_amine_oxid	Copper amine oxidase, enzyme domain	250	674	553.1	3.2e-166
g879	Pesta-scaffold00001	PF02728.11	Cu_amine_oxidN3	Copper amine oxidase, N3 domain	125	223	61.8	4.8e-17
g879	Pesta-scaffold00001	PF02727.11	Cu_amine_oxidN2	Copper amine oxidase, N2 domain	34	120	52.6	3.4e-14
g881	Pesta-scaffold00001	PF00067.17	p450	Cytochrome P450	86	517	143.2	8.2e-42
g882	Pesta-scaffold00001	PF01522.16	Polysacc_deac_1	Polysaccharide deacetylase	21	147	79.8	1.2e-22
g883	Pesta-scaffold00001	PF03417.11	AAT	Acyl-coenzyme A:6-aminopenicillanic acid acyl-transferase	115	342	108.3	3.7e-31
g884	Pesta-scaffold00001	PF11951.3	Fungal_trans_2	Fungal specific transcription factor domain	194	536	143.9	4.9e-42
g884	Pesta-scaffold00001	PF00172.13	Zn_clus	Fungal Zn(2)-Cys(6) binuclear cluster domain	9	45	26.1	5.6e-06
g885	Pesta-scaffold00001	PF00732.14	GMC_oxred_N	GMC oxidoreductase	5	315	235.3	7.8e-70
g885	Pesta-scaffold00001	PF05199.8	GMC_oxred_C	GMC oxidoreductase	427	564	105.3	3e-30
g887	Pesta-scaffold00001	PF01042.16	Ribonuc_L-PSP	Endoribonuclease L-PSP	23	153	37.7	1.4e-09
g888	Pesta-scaffold00001	PF02129.13	Peptidase_S15	X-Pro dipeptidyl-peptidase (S15 family)	69	256	122.9	1.5e-35
g888	Pesta-scaffold00001	PF08530.5	PepX_C	X-Pro dipeptidyl-peptidase C-terminal non-catalytic domain	343	596	47.5	1.9e-12
g893	Pesta-scaffold00001	PF00067.17	p450	Cytochrome P450	527	992	201.9	1.3e-59
g893	Pesta-scaffold00001	PF00149.23	Metallophos	Calcineurin-like phosphoesterase	127	382	26.7	3.1e-06
g899	Pesta-scaffold00001	PF00067.17	p450	Cytochrome P450	82	547	251	1.7e-74
g900	Pesta-scaffold00001	PF00172.13	Zn_clus	Fungal Zn(2)-Cys(6) binuclear cluster domain	9	47	37.1	2e-09
g901	Pesta-scaffold00001	PF00106.20	adh_short	short chain dehydrogenase	107	268	100	1.3e-28
g902	Pesta-scaffold00001	PF07859.8	Abhydrolase_3	alpha/beta hydrolase fold	123	341	92.2	3.1e-26
g903	Pesta-scaffold00001	PF13738.1	Pyr_redox_3	Pyridine nucleotide-disulphide oxidoreductase	15	221	84.2	1.2e-23
g905	Pesta-scaffold00001	PF00650.15	CRAL_TRIO	CRAL/TRIO domain	135	285	131.3	2.1e-38
g905	Pesta-scaffold00001	PF03765.10	CRAL_TRIO_N	CRAL/TRIO, N-terminal domain	44	101	43.4	2.6e-11
g907	Pesta-scaffold00001	PF12505.3	DUF3712	Protein of unknown function (DUF3712)	144	267	79.5	1.9e-22
g910	Pesta-scaffold00002	PF00025.16	Arf	ADP-ribosylation factor family	57	197	191	9.5e-57
g912	Pesta-scaffold00002	PF01466.14	Skp1	Skp1 family, dimerisation domain	88	165	133.2	2.3e-39
g912	Pesta-scaffold00002	PF03931.10	Skp1_POZ	Skp1 family, tetramerisation domain	6	69	80.8	5.3e-23
g913	Pesta-scaffold00002	PF10256.4	Erf4	Golgin subfamily A member 7/ERF4 family	500	625	99.2	1.3e-28
g916	Pesta-scaffold00002	PF13886.1	DUF4203	Domain of unknown function (DUF4203)	125	332	128.2	2.8e-37
g921	Pesta-scaffold00002	PF00436.20	SSB	Single-strand binding protein family	25	127	56	2.8e-15
g923	Pesta-scaffold00002	PF02076.10	STE3	Pheromone A receptor	13	308	147.1	5e-43
g927	Pesta-scaffold00002	PF06441.7	EHN	Epoxide hydrolase N terminus	5	118	118.6	1.1e-34
g927	Pesta-scaffold00002	PF00561.15	Abhydrolase_1	alpha/beta hydrolase fold	132	257	32.1	7.7e-08
g929	Pesta-scaffold00002	PF13507.1	GATase_5	CobB/CobQ-like glutamine amidotransferase domain	1097	1356	328.6	1.8e-98
g929	Pesta-scaffold00002	PF00586.19	AIRS	AIR synthase related protein, N-terminal domain	266	398	76.6	1.3e-21
g929	Pesta-scaffold00002	PF02769.17	AIRS_C	AIR synthase related protein, C-terminal domain	442	599	75.8	3.4e-21
g934	Pesta-scaffold00002	PF09748.4	Med10	Transcription factor subunit Med10 of Mediator complex	12	149	133.5	3.6e-39
g936	Pesta-scaffold00002	PF01565.18	FAD_binding_4	FAD binding domain	150	293	49	3.8e-13
g936	Pesta-scaffold00002	PF08031.7	BBE	Berberine and berberine like	562	604	37	2.2e-09
g937	Pesta-scaffold00002	PF01636.18	APH	Phosphotransferase enzyme family	65	347	38.7	8.6e-10
g938	Pesta-scaffold00002	PF12796.2	Ank_2	Ankyrin repeats (3 copies)	32	157	34.4	2e-08
g941	Pesta-scaffold00002	PF00732.14	GMC_oxred_N	GMC oxidoreductase	36	353	182.1	1.2e-53
g941	Pesta-scaffold00002	PF05199.8	GMC_oxred_C	GMC oxidoreductase	479	616	117	7.5e-34
g947	Pesta-scaffold00002	PF00550.20	PP-binding	Phosphopantetheine attachment site	60	127	43.6	2.6e-11
g948	Pesta-scaffold00002	PF12838.2	Fer4_7	4Fe-4S dicluster domain	122	176	45.3	7.9e-12
g950	Pesta-scaffold00002	PF00933.16	Glyco_hydro_3	Glycosyl hydrolase family 3 N terminal domain	75	368	283.4	1.6e-84
g950	Pesta-scaffold00002	PF01915.17	Glyco_hydro_3_C	Glycosyl hydrolase family 3 C-terminal domain	427	677	171.8	1.5e-50
g950	Pesta-scaffold00002	PF14310.1	Fn3-like	Fibronectin type III-like domain	730	801	81.9	2.2e-23
g951	Pesta-scaffold00002	PF07690.11	MFS_1	Major Facilitator Superfamily	66	479	93.9	7.7e-27
g955	Pesta-scaffold00002	PF04389.12	Peptidase_M28	Peptidase family M28	228	416	81.4	6.1e-23
g957	Pesta-scaffold00002	PF01557.13	FAA_hydrolase	Fumarylacetoacetate (FAA) hydrolase family	81	291	183.1	4.6e-54
g959	Pesta-scaffold00002	PF04082.13	Fungal_trans	Fungal specific transcription factor domain	220	467	69.1	2.6e-19
g959	Pesta-scaffold00002	PF00172.13	Zn_clus	Fungal Zn(2)-Cys(6) binuclear cluster domain	24	61	30.7	2.1e-07
g960	Pesta-scaffold00002	PF01494.14	FAD_binding_3	FAD binding domain	11	364	67.5	1e-18
g961	Pesta-scaffold00002	PF07859.8	Abhydrolase_3	alpha/beta hydrolase fold	39	158	38.8	6.8e-10
g961	Pesta-scaffold00002	PF00326.16	Peptidase_S9	Prolyl oligopeptidase family	219	321	30	2.7e-07
g962	Pesta-scaffold00002	PF07719.12	TPR_2	Tetratricopeptide repeat	30	63	19.7	0.00053
g963	Pesta-scaffold00002	PF07883.6	Cupin_2	Cupin domain	56	116	36.7	2.1e-09
g964	Pesta-scaffold00002	PF02668.11	TauD	Taurine catabolism dioxygenase TauD, TfdA family	12	396	110.9	8e-32
g965	Pesta-scaffold00002	PF00383.17	dCMP_cyt_deam_1	Cytidine and deoxycytidylate deaminase zinc-binding region	172	292	31.9	7.5e-08
g966	Pesta-scaffold00002	PF14226.1	DIOX_N	non-haem dioxygenase in morphine synthesis N-terminal	10	119	66.4	3.1e-18
g966	Pesta-scaffold00002	PF03171.15	2OG-FeII_Oxy	2OG-Fe(II) oxygenase superfamily	165	281	61.1	9.5e-17
g967	Pesta-scaffold00002	PF02133.10	Transp_cyt_pur	Permease for cytosine/purines, uracil, thiamine, allantoin	53	504	306.5	2.3e-91
g969	Pesta-scaffold00002	PF04082.13	Fungal_trans	Fungal specific transcription factor domain	196	444	28	9.1e-07
g971	Pesta-scaffold00002	PF12697.2	Abhydrolase_6	Alpha/beta hydrolase family	35	274	133.3	1.2e-38
g973	Pesta-scaffold00002	PF02668.11	TauD	Taurine catabolism dioxygenase TauD, TfdA family	39	398	107.3	9.5e-31
g974	Pesta-scaffold00002	PF13622.1	4HBT_3	Thioesterase-like superfamily	20	299	96.8	1.7e-27
g975	Pesta-scaffold00002	PF00067.17	p450	Cytochrome P450	46	481	180.2	4.9e-53
g977	Pesta-scaffold00002	PF06985.6	HET	Heterokaryon incompatibility protein (HET)	218	348	88.1	5.4e-25
g979	Pesta-scaffold00002	PF02133.10	Transp_cyt_pur	Permease for cytosine/purines, uracil, thiamine, allantoin	36	492	308.5	5.6e-92
g981	Pesta-scaffold00002	PF06032.7	DUF917	Protein of unknown function (DUF917)	600	971	362	2.1e-108
g981	Pesta-scaffold00002	PF01968.13	Hydantoinase_A	Hydantoinase/oxoprolinase	206	470	166.3	7.9e-49
g981	Pesta-scaffold00002	PF05378.8	Hydant_A_N	Hydantoinase/oxoprolinase N-terminal region	6	187	102.9	1.3e-29
g983	Pesta-scaffold00002	PF13738.1	Pyr_redox_3	Pyridine nucleotide-disulphide oxidoreductase	8	215	80.6	1.5e-22
g984	Pesta-scaffold00002	PF13561.1	adh_short_C2	Enoyl-(Acyl carrier protein) reductase	23	282	86.5	2.2e-24
g986	Pesta-scaffold00002	PF00106.20	adh_short	short chain dehydrogenase	5	182	92.8	2.1e-26
g987	Pesta-scaffold00002	PF00188.21	CAP	Cysteine-rich secretory protein family	80	205	62	7e-17
g989	Pesta-scaffold00002	PF00400.27	WD40	WD domain, G-beta repeat	282	353	18.1	0.0017
g991	Pesta-scaffold00002	PF01370.16	Epimerase	NAD dependent epimerase/dehydratase family	8	267	54.1	1.3e-14
g993	Pesta-scaffold00002	PF07690.11	MFS_1	Major Facilitator Superfamily	96	293	61.7	4.6e-17
g994	Pesta-scaffold00002	PF02133.10	Transp_cyt_pur	Permease for cytosine/purines, uracil, thiamine, allantoin	58	482	116.7	9.4e-34
g995	Pesta-scaffold00002	PF00857.15	Isochorismatase	Isochorismatase family	29	207	86.6	1.7e-24
g996	Pesta-scaffold00002	PF11696.3	DUF3292	Protein of unknown function (DUF3292)	55	702	813.5	8.2e-245
g997	Pesta-scaffold00002	PF01238.16	PMI_typeI	Phosphomannose isomerase type I	5	371	233.5	3.5e-69
g998	Pesta-scaffold00002	PF00083.19	Sugar_tr	Sugar (and other) transporter	50	501	297.4	1.4e-88
g999	Pesta-scaffold00002	PF04082.13	Fungal_trans	Fungal specific transcription factor domain	165	421	35.9	3.5e-09
g1001	Pesta-scaffold00002	PF02836.12	Glyco_hydro_2_C	Glycosyl hydrolases family 2, TIM barrel domain	308	618	356.7	7.1e-107
g1001	Pesta-scaffold00002	PF02929.12	Bgal_small_N	Beta galactosidase small chain	747	1035	193.6	3.2e-57
g1001	Pesta-scaffold00002	PF02837.13	Glyco_hydro_2_N	Glycosyl hydrolases family 2, sugar binding domain	28	201	175.4	6.7e-52
g1001	Pesta-scaffold00002	PF00703.16	Glyco_hydro_2	Glycosyl hydrolases family 2	203	306	55.4	6.8e-15
g1003	Pesta-scaffold00002	PF08282.7	Hydrolase_3	haloacid dehalogenase-like hydrolase	6	220	45.2	7.9e-12
g1005	Pesta-scaffold00002	PF00141.18	peroxidase	Peroxidase	28	254	96.6	1.5e-27
g1005	Pesta-scaffold00002	PF11895.3	DUF3415	Domain of unknown function (DUF3415)	228	280	31	1.6e-07
g1007	Pesta-scaffold00002	PF03031.13	NIF	NLI interacting factor-like phosphatase	165	341	98.6	2.8e-28
g1007	Pesta-scaffold00002	PF12738.2	PTCB-BRCT	twin BRCT domain	512	581	38.9	5.6e-10
g1009	Pesta-scaffold00002	PF06212.7	GRIM-19	GRIM-19 protein	1	115	80.6	7.4e-23
g1015	Pesta-scaffold00002	PF03033.15	Glyco_transf_28	Glycosyltransferase family 28 N-terminal domain	968	1103	91.9	2.8e-26
g1015	Pesta-scaffold00002	PF02893.15	GRAM	GRAM domain	783	849	53.8	9.8e-15
g1015	Pesta-scaffold00002	PF00169.24	PH	PH domain	306	401	48.5	7.6e-13
g1018	Pesta-scaffold00002	PF00828.14	Ribosomal_L18e	Ribosomal protein L18e/L15	50	178	118.4	2.4e-34
g1019	Pesta-scaffold00002	PF13307.1	Helicase_C_2	Helicase C-terminal domain	619	834	199.3	3.8e-59
g1019	Pesta-scaffold00002	PF06733.10	DEAD_2	DEAD_2	218	379	135.7	1e-39
g1021	Pesta-scaffold00002	PF00481.16	PP2C	Protein phosphatase 2C	135	429	132.1	2.2e-38
g1026	Pesta-scaffold00002	PF00733.16	Asn_synthase	Asparagine synthase	258	629	178.4	1.7e-52
g1026	Pesta-scaffold00002	PF13537.1	GATase_7	Glutamine amidotransferase domain	64	186	119.5	6.7e-35
g1029	Pesta-scaffold00002	PF12222.3	PNGaseA	Peptide N-acetyl-beta-D-glucosaminyl asparaginase amidase A	96	531	404.2	6.1e-121
g1030	Pesta-scaffold00002	PF04034.8	DUF367	Domain of unknown function (DUF367)	84	211	157.6	1e-46
g1030	Pesta-scaffold00002	PF04068.10	RLI	Possible Fer4-like domain in RNase L inhibitor, RLI	46	80	40.1	1.9e-10
g1033	Pesta-scaffold00002	PF00790.14	VHS	VHS domain	20	164	149.1	5.6e-44
g1033	Pesta-scaffold00002	PF03127.9	GAT	GAT domain	231	331	77.5	5.8e-22
g1033	Pesta-scaffold00002	PF02883.15	Alpha_adaptinC2	Adaptin C-terminal domain	532	635	46.2	4.5e-12
g1034	Pesta-scaffold00002	PF00009.22	GTP_EFTU	Elongation factor Tu GTP binding domain	1103	1269	130.4	5e-38
g1034	Pesta-scaffold00002	PF11987.3	IF-2	Translation-initiation factor 2	1418	1524	88.9	1.7e-25
g1034	Pesta-scaffold00002	PF10252.4	PP28	Casein kinase substrate phosphoprotein PP28	129	223	86.1	1.2e-24
g1034	Pesta-scaffold00002	PF03144.20	GTP_EFTU_D2	Elongation factor Tu domain 2	1293	1356	33.8	2.6e-08
g1038	Pesta-scaffold00002	PF12974.2	Phosphonate-bd	ABC transporter, phosphonate, periplasmic substrate-binding protein	18	236	71.6	6e-20
g1041	Pesta-scaffold00002	PF12922.2	Cnd1_N	non-SMC mitotic condensation complex subunit 1, N-term	125	295	173.6	2.7e-51
g1041	Pesta-scaffold00002	PF12717.2	Cnd1	non-SMC mitotic condensation complex subunit 1	1080	1244	173.9	2.7e-51
g1044	Pesta-scaffold00002	PF00069.20	Pkinase	Protein kinase domain	163	485	137.1	5.3e-40
g1045	Pesta-scaffold00002	PF09994.4	DUF2235	Uncharacterized alpha/beta hydrolase domain (DUF2235)	15	371	226.9	2.9e-67
g1047	Pesta-scaffold00002	PF08303.6	tRNA_lig_kinase	tRNA ligase kinase domain	1	66	35.1	1.1e-08
g1048	Pesta-scaffold00002	PF01266.19	DAO	FAD dependent oxidoreductase	9	401	117.2	7.1e-34
g1052	Pesta-scaffold00002	PF01565.18	FAD_binding_4	FAD binding domain	86	222	66.9	1.2e-18
g1054	Pesta-scaffold00002	PF00109.21	ketoacyl-synt	Beta-ketoacyl synthase, N-terminal domain	13	255	228.4	9.5e-68
g1054	Pesta-scaffold00002	PF02801.17	Ketoacyl-synt_C	Beta-ketoacyl synthase, C-terminal domain	263	380	110.8	3.3e-32
g1054	Pesta-scaffold00002	PF00698.16	Acyl_transf_1	Acyl transferase domain	529	847	89.2	2.9e-25
g1054	Pesta-scaffold00002	PF08242.7	Methyltransf_12	Methyltransferase domain	1749	1849	62.9	2.8e-17
g1054	Pesta-scaffold00002	PF14765.1	PS-DH	Polyketide synthase dehydratase	937	1225	58	8.2e-16
g1054	Pesta-scaffold00002	PF00550.20	PP-binding	Phosphopantetheine attachment site	1288	1354	44.2	1.6e-11
g1055	Pesta-scaffold00002	PF00190.17	Cupin_1	Cupin	255	390	50.3	1.6e-13
g1055	Pesta-scaffold00002	PF07883.6	Cupin_2	Cupin domain	107	180	29.4	3.8e-07
g1057	Pesta-scaffold00002	PF05694.6	SBP56	56kDa selenium binding protein (SBP56)	56	452	20.4	0.00015
g1058	Pesta-scaffold00002	PF07731.9	Cu-oxidase_2	Multicopper oxidase	365	500	142.6	5.3e-42
g1058	Pesta-scaffold00002	PF07732.10	Cu-oxidase_3	Multicopper oxidase	32	150	128.6	8.9e-38
g1058	Pesta-scaffold00002	PF00394.17	Cu-oxidase	Multicopper oxidase	158	306	128.2	2.5e-37
g1059	Pesta-scaffold00002	PF03239.9	FTR1	Iron permease FTR1 family	7	324	283.7	1.3e-84
g1060	Pesta-scaffold00002	PF01794.14	Ferric_reduct	Ferric reductase like transmembrane component	114	229	60.9	1.2e-16
g1060	Pesta-scaffold00002	PF08022.7	FAD_binding_8	FAD-binding domain	265	363	58	6.8e-16
g1060	Pesta-scaffold00002	PF08030.7	NAD_binding_6	Ferric reductase NAD binding domain	368	541	52.1	6.5e-14
g1062	Pesta-scaffold00002	PF06985.6	HET	Heterokaryon incompatibility protein (HET)	22	156	55.4	6.8e-15
g1066	Pesta-scaffold00002	PF06985.6	HET	Heterokaryon incompatibility protein (HET)	20	186	53.2	3.3e-14
g1070	Pesta-scaffold00002	PF12697.2	Abhydrolase_6	Alpha/beta hydrolase family	9	246	117.9	5.8e-34
g1072	Pesta-scaffold00002	PF00441.19	Acyl-CoA_dh_1	Acyl-CoA dehydrogenase, C-terminal domain	261	414	88.6	4.2e-25
g1072	Pesta-scaffold00002	PF02771.11	Acyl-CoA_dh_N	Acyl-CoA dehydrogenase, N-terminal domain	7	124	44.4	2e-11
g1072	Pesta-scaffold00002	PF02770.14	Acyl-CoA_dh_M	Acyl-CoA dehydrogenase, middle domain	130	191	30.5	1.8e-07
g1074	Pesta-scaffold00002	PF00743.14	FMO-like	Flavin-binding monooxygenase-like	1	249	89.3	1.6e-25
g1075	Pesta-scaffold00002	PF00067.17	p450	Cytochrome P450	28	483	212.8	6.3e-63
g1075	Pesta-scaffold00002	PF06985.6	HET	Heterokaryon incompatibility protein (HET)	694	842	68.9	4.6e-19
g1076	Pesta-scaffold00002	PF04082.13	Fungal_trans	Fungal specific transcription factor domain	177	453	30.8	1.2e-07
g1077	Pesta-scaffold00002	PF00753.22	Lactamase_B	Metallo-beta-lactamase superfamily	6	222	36.1	4.7e-09
g1078	Pesta-scaffold00002	PF01494.14	FAD_binding_3	FAD binding domain	304	395	25.6	5.5e-06
g1080	Pesta-scaffold00002	PF01636.18	APH	Phosphotransferase enzyme family	50	190	43	4.1e-11
g1082	Pesta-scaffold00002	PF00106.20	adh_short	short chain dehydrogenase	224	395	39.7	4.2e-10
g1082	Pesta-scaffold00002	PF00258.20	Flavodoxin_1	Flavodoxin	7	142	38.2	1.2e-09
g1085	Pesta-scaffold00002	PF01494.14	FAD_binding_3	FAD binding domain	8	369	287	1.9e-85
g1087	Pesta-scaffold00002	PF00538.14	Linker_histone	linker histone H1 and H5 family	58	125	70.8	7.5e-20
g1092	Pesta-scaffold00002	PF10996.3	Beta-Casp	Beta-Casp domain	568	723	90.8	5.9e-26
g1092	Pesta-scaffold00002	PF13299.1	CPSF100_C	Cleavage and polyadenylation factor 2 C-terminal	1118	1205	65.3	7.1e-18
g1094	Pesta-scaffold00002	PF04811.10	Sec23_trunk	Sec23/Sec24 trunk domain	398	650	177.5	2.6e-52
g1094	Pesta-scaffold00002	PF04815.10	Sec23_helical	Sec23/Sec24 helical domain	752	857	85.1	1.8e-24
g1094	Pesta-scaffold00002	PF08033.7	Sec23_BS	Sec23/Sec24 beta-sandwich domain	655	740	60.4	1.8e-16
g1094	Pesta-scaffold00002	PF04810.10	zf-Sec23_Sec24	Sec23/Sec24 zinc finger	332	361	29.9	2.8e-07
g1094	Pesta-scaffold00002	PF00626.17	Gelsolin	Gelsolin repeat	879	944	28.7	7.6e-07
g1098	Pesta-scaffold00002	PF10021.4	DUF2263	Uncharacterized protein conserved in bacteria (DUF2263)	10	149	50.8	1.7e-13
g1099	Pesta-scaffold00002	PF00152.15	tRNA-synt_2	tRNA synthetases class II (D, K and N)	140	515	231.5	1.1e-68
g1099	Pesta-scaffold00002	PF01336.20	tRNA_anti-codon	OB-fold nucleic acid binding domain	51	124	23	5.2e-05
g1102	Pesta-scaffold00002	PF09729.4	Gti1_Pac2	Gti1/Pac2 family	3	146	162.4	8.1e-48
g1105	Pesta-scaffold00002	PF13450.1	NAD_binding_8	NAD(P)-binding Rossmann-like domain	38	104	37.2	2.1e-09
g1108	Pesta-scaffold00002	PF04616.9	Glyco_hydro_43	Glycosyl hydrolases family 43	43	270	39.8	2.6e-10
g1112	Pesta-scaffold00002	PF13489.1	Methyltransf_23	Methyltransferase domain	169	341	76.9	1.3e-21
g1113	Pesta-scaffold00002	PF00026.18	Asp	Eukaryotic aspartyl protease	149	384	25.3	7.7e-06
g1114	Pesta-scaffold00002	PF03435.13	Saccharop_dh	Saccharopine dehydrogenase	4	197	64.9	6.3e-18
g1115	Pesta-scaffold00002	PF02458.10	Transferase	Transferase family	122	489	87.4	6.4e-25
g1118	Pesta-scaffold00002	PF00106.20	adh_short	short chain dehydrogenase	52	241	61.5	8.7e-17
g1124	Pesta-scaffold00002	PF07690.11	MFS_1	Major Facilitator Superfamily	68	482	110.9	5.2e-32
g1125	Pesta-scaffold00002	PF00264.15	Tyrosinase	Common central domain of tyrosinase	68	251	124.9	4.8e-36
g1128	Pesta-scaffold00002	PF07690.11	MFS_1	Major Facilitator Superfamily	58	456	151.5	2.2e-44
g1129	Pesta-scaffold00002	PF12311.3	DUF3632	Protein of unknown function (DUF3632)	96	263	82.5	3.1e-23
g1131	Pesta-scaffold00002	PF13639.1	zf-RING_2	Ring finger domain	192	245	37.7	1.3e-09
g1133	Pesta-scaffold00002	PF01828.12	Peptidase_A4	Peptidase A4 family	65	261	258.6	2.6e-77
g1136	Pesta-scaffold00002	PF00172.13	Zn_clus	Fungal Zn(2)-Cys(6) binuclear cluster domain	14	52	28.8	7.9e-07
g1140	Pesta-scaffold00002	PF07993.7	NAD_binding_4	Male sterility protein	659	900	107.8	3.9e-31
g1140	Pesta-scaffold00002	PF00501.23	AMP-binding	AMP-binding enzyme	20	328	66.9	1.1e-18
g1140	Pesta-scaffold00002	PF00550.20	PP-binding	Phosphopantetheine attachment site	545	610	30.5	3.1e-07
g1141	Pesta-scaffold00002	PF04172.11	LrgB	LrgB-like family	293	534	94.6	4.4e-27
g1144	Pesta-scaffold00002	PF13460.1	NAD_binding_10	NADH(P)-binding	3	212	93.2	1.8e-26
g1145	Pesta-scaffold00002	PF00144.19	Beta-lactamase	Beta-lactamase	77	408	99	2.6e-28
g1146	Pesta-scaffold00002	PF12697.2	Abhydrolase_6	Alpha/beta hydrolase family	189	424	78	8.9e-22
g1147	Pesta-scaffold00002	PF06985.6	HET	Heterokaryon incompatibility protein (HET)	127	259	41.4	1.5e-10
g1149	Pesta-scaffold00002	PF02458.10	Transferase	Transferase family	121	445	34.8	6.1e-09
g1150	Pesta-scaffold00002	PF00067.17	p450	Cytochrome P450	33	483	171.6	2.1e-50
g1151	Pesta-scaffold00002	PF00106.20	adh_short	short chain dehydrogenase	44	195	43.8	2.3e-11
g1153	Pesta-scaffold00002	PF13577.1	SnoaL_4	SnoaL-like domain	14	139	109.4	1e-31
g1154	Pesta-scaffold00002	PF01565.18	FAD_binding_4	FAD binding domain	88	187	52.5	3.3e-14
g1155	Pesta-scaffold00002	PF03936.11	Terpene_synth_C	Terpene synthase family, metal binding domain	31	282	62.2	4.2e-17
g1156	Pesta-scaffold00002	PF00067.17	p450	Cytochrome P450	39	491	186.6	5.6e-55
g1157	Pesta-scaffold00002	PF00067.17	p450	Cytochrome P450	45	497	195.2	1.4e-57
g1158	Pesta-scaffold00002	PF01370.16	Epimerase	NAD dependent epimerase/dehydratase family	15	280	55.2	6.4e-15
g1159	Pesta-scaffold00002	PF00067.17	p450	Cytochrome P450	30	426	151.7	2.2e-44
g1160	Pesta-scaffold00002	PF00891.13	Methyltransf_2	O-methyltransferase	164	383	101.1	5.3e-29
g1161	Pesta-scaffold00002	PF00248.16	Aldo_ket_red	Aldo/keto reductase family	17	337	231.4	9.1e-69
g1163	Pesta-scaffold00002	PF07690.11	MFS_1	Major Facilitator Superfamily	56	400	70	1.4e-19
g1165	Pesta-scaffold00002	PF07519.6	Tannase	Tannase and feruloyl esterase	57	500	278.9	6.9e-83
g1167	Pesta-scaffold00002	PF01565.18	FAD_binding_4	FAD binding domain	67	203	78.7	2.6e-22
g1170	Pesta-scaffold00002	PF05729.7	NACHT	NACHT domain	544	739	35.7	6.2e-09
g1170	Pesta-scaffold00002	PF00646.28	F-box	F-box domain	30	75	23.4	3.2e-05
g1172	Pesta-scaffold00002	PF00775.16	Dioxygenase_C	Dioxygenase	132	245	41.2	1e-10
g1173	Pesta-scaffold00002	PF00264.15	Tyrosinase	Common central domain of tyrosinase	67	255	117.5	8.9e-34
g1175	Pesta-scaffold00002	PF01565.18	FAD_binding_4	FAD binding domain	139	281	58.6	4.2e-16
g1175	Pesta-scaffold00002	PF08031.7	BBE	Berberine and berberine like	525	569	39.6	3.5e-10
g1177	Pesta-scaffold00002	PF00264.15	Tyrosinase	Common central domain of tyrosinase	54	292	138.3	3.9e-40
g1178	Pesta-scaffold00002	PF06985.6	HET	Heterokaryon incompatibility protein (HET)	105	262	103.8	7.7e-30
g1180	Pesta-scaffold00002	PF00172.13	Zn_clus	Fungal Zn(2)-Cys(6) binuclear cluster domain	196	236	23.3	4.4e-05
g1181	Pesta-scaffold00002	PF07247.7	AATase	Alcohol acetyltransferase	4	470	67.1	1.1e-18
g1182	Pesta-scaffold00002	PF00326.16	Peptidase_S9	Prolyl oligopeptidase family	407	623	150.6	3.4e-44
g1184	Pesta-scaffold00002	PF06985.6	HET	Heterokaryon incompatibility protein (HET)	68	246	65	7.5e-18
g1188	Pesta-scaffold00002	PF00248.16	Aldo_ket_red	Aldo/keto reductase family	13	314	156.5	5.8e-46
g1193	Pesta-scaffold00002	PF01494.14	FAD_binding_3	FAD binding domain	2	366	75.5	3.8e-21
g1198	Pesta-scaffold00002	PF12710.2	HAD	haloacid dehalogenase-like hydrolase	65	309	30	5.1e-07
g1202	Pesta-scaffold00002	PF00067.17	p450	Cytochrome P450	52	509	231.4	1.5e-68
g1204	Pesta-scaffold00002	PF06985.6	HET	Heterokaryon incompatibility protein (HET)	54	218	91.2	6e-26
g1205	Pesta-scaffold00002	PF04082.13	Fungal_trans	Fungal specific transcription factor domain	195	406	47.2	1.2e-12
g1205	Pesta-scaffold00002	PF00172.13	Zn_clus	Fungal Zn(2)-Cys(6) binuclear cluster domain	13	46	21.5	0.00016
g1207	Pesta-scaffold00002	PF00264.15	Tyrosinase	Common central domain of tyrosinase	87	266	121.5	5.4e-35
g1208	Pesta-scaffold00002	PF01344.20	Kelch_1	Kelch motif	93	146	40	2e-10
g1208	Pesta-scaffold00002	PF13415.1	Kelch_3	Galactose oxidase, central domain	268	318	28.3	1.4e-06
g1208	Pesta-scaffold00002	PF13418.1	Kelch_4	Galactose oxidase, central domain	39	90	23.6	3.2e-05
g1209	Pesta-scaffold00002	PF00122.15	E1-E2_ATPase	E1-E2 ATPase	194	433	163.1	5.1e-48
g1209	Pesta-scaffold00002	PF00689.16	Cation_ATPase_C	Cation transporting ATPase, C-terminus	868	1074	141	2.8e-41
g1209	Pesta-scaffold00002	PF00702.21	Hydrolase	haloacid dehalogenase-like hydrolase	437	799	106.5	2.5e-30
g1209	Pesta-scaffold00002	PF00690.21	Cation_ATPase_N	Cation transporter/ATPase, N-terminus	106	173	45.8	2.9e-12
g1212	Pesta-scaffold00002	PF06985.6	HET	Heterokaryon incompatibility protein (HET)	336	474	112.7	1.4e-32
g1214	Pesta-scaffold00002	PF07519.6	Tannase	Tannase and feruloyl esterase	73	553	298.9	6e-89
g1217	Pesta-scaffold00002	PF04909.9	Amidohydro_2	Amidohydrolase	12	345	113	1.7e-32
g1220	Pesta-scaffold00002	PF12796.2	Ank_2	Ankyrin repeats (3 copies)	263	355	58.5	6e-16
g1220	Pesta-scaffold00002	PF01544.13	CorA	CorA-like Mg2+ transporter protein	769	993	45.2	5.9e-12
g1220	Pesta-scaffold00002	PF13857.1	Ank_5	Ankyrin repeats (many copies)	196	249	32.1	8.8e-08
g1220	Pesta-scaffold00002	PF00023.25	Ank	Ankyrin repeat	141	172	20.7	0.00024
g1222	Pesta-scaffold00002	PF00067.17	p450	Cytochrome P450	39	498	203.8	3.5e-60
g1224	Pesta-scaffold00002	PF00150.13	Cellulase	Cellulase (glycosyl hydrolase family 5)	51	389	68.4	5.6e-19
g1226	Pesta-scaffold00002	PF00338.17	Ribosomal_S10	Ribosomal protein S10p/S20e	20	115	96.3	6.7e-28
g1227	Pesta-scaffold00002	PF02845.11	CUE	CUE domain	335	376	38.6	5.1e-10
g1231	Pesta-scaffold00002	PF05368.8	NmrA	NmrA-like family	7	254	108.1	3.8e-31
g1234	Pesta-scaffold00002	PF08241.7	Methyltransf_11	Methyltransferase domain	71	170	27.4	3.3e-06
g1235	Pesta-scaffold00002	PF13450.1	NAD_binding_8	NAD(P)-binding Rossmann-like domain	444	511	33.6	2.7e-08
g1237	Pesta-scaffold00002	PF11309.3	DUF3112	Protein of unknown function (DUF3112)	117	273	130.7	4e-38
g1242	Pesta-scaffold00002	PF01058.17	Oxidored_q6	NADH ubiquinone oxidoreductase, 20 Kd subunit	93	203	81.5	3.7e-23
g1244	Pesta-scaffold00002	PF02558.11	ApbA	Ketopantoate reductase PanE/ApbA	7	166	101.2	3.4e-29
g1244	Pesta-scaffold00002	PF08546.6	ApbA_C	Ketopantoate reductase PanE/ApbA C terminal	198	322	93.7	7.7e-27
g1246	Pesta-scaffold00002	PF00067.17	p450	Cytochrome P450	39	512	206.7	4.5e-61
g1250	Pesta-scaffold00002	PF01083.17	Cutinase	Cutinase	93	250	135.3	1.8e-39
g1251	Pesta-scaffold00002	PF07883.6	Cupin_2	Cupin domain	24	97	34.1	1.3e-08
g1253	Pesta-scaffold00002	PF07731.9	Cu-oxidase_2	Multicopper oxidase	634	760	132.5	6.5e-39
g1253	Pesta-scaffold00002	PF07732.10	Cu-oxidase_3	Multicopper oxidase	294	413	129.1	6.1e-38
g1253	Pesta-scaffold00002	PF00394.17	Cu-oxidase	Multicopper oxidase	419	573	119	1.6e-34
g1255	Pesta-scaffold00002	PF00884.18	Sulfatase	Sulfatase	28	339	118.9	2.4e-34
g1259	Pesta-scaffold00002	PF04909.9	Amidohydro_2	Amidohydrolase	34	328	144.9	3.3e-42
g1260	Pesta-scaffold00002	PF00248.16	Aldo_ket_red	Aldo/keto reductase family	31	335	202.8	4.7e-60
g1261	Pesta-scaffold00002	PF11905.3	DUF3425	Domain of unknown function (DUF3425)	496	615	106.7	8.1e-31
g1262	Pesta-scaffold00002	PF01565.18	FAD_binding_4	FAD binding domain	75	203	61.3	6.5e-17
g1263	Pesta-scaffold00002	PF13520.1	AA_permease_2	Amino acid permease	29	478	169.9	6.3e-50
g1265	Pesta-scaffold00002	PF01593.19	Amino_oxidase	Flavin containing amine oxidoreductase	246	484	161.2	4.1e-47
g1265	Pesta-scaffold00002	PF13450.1	NAD_binding_8	NAD(P)-binding Rossmann-like domain	44	115	39.3	4.9e-10
g1266	Pesta-scaffold00002	PF08240.7	ADH_N	Alcohol dehydrogenase GroES-like domain	25	146	102.8	7.7e-30
g1266	Pesta-scaffold00002	PF00107.21	ADH_zinc_N	Zinc-binding dehydrogenase	186	315	79.5	1.5e-22
g1268	Pesta-scaffold00002	PF00775.16	Dioxygenase_C	Dioxygenase	86	158	32	6.4e-08
g1269	Pesta-scaffold00002	PF00651.26	BTB	BTB/POZ domain	38	138	48.8	5.8e-13
g1271	Pesta-scaffold00002	PF00651.26	BTB	BTB/POZ domain	7	102	48.5	6.9e-13
g1272	Pesta-scaffold00002	PF00651.26	BTB	BTB/POZ domain	8	113	31.7	1.1e-07
g1274	Pesta-scaffold00002	PF00385.19	Chromo	Chromo (CHRromatin Organisation MOdifier) domain	82	132	52.7	2.4e-14
g1275	Pesta-scaffold00002	PF02458.10	Transferase	Transferase family	75	409	48.3	4.8e-13
g1276	Pesta-scaffold00002	PF04082.13	Fungal_trans	Fungal specific transcription factor domain	129	375	111.8	2.3e-32
g1277	Pesta-scaffold00002	PF01042.16	Ribonuc_L-PSP	Endoribonuclease L-PSP	13	133	81.3	4.2e-23
g1280	Pesta-scaffold00002	PF00857.15	Isochorismatase	Isochorismatase family	29	242	83.1	2.1e-23
g1284	Pesta-scaffold00002	PF03022.11	MRJP	Major royal jelly protein	119	394	97	1.1e-27
g1289	Pesta-scaffold00002	PF04082.13	Fungal_trans	Fungal specific transcription factor domain	170	408	53.8	1.2e-14
g1289	Pesta-scaffold00002	PF00172.13	Zn_clus	Fungal Zn(2)-Cys(6) binuclear cluster domain	4	42	34.1	1.8e-08
g1290	Pesta-scaffold00002	PF07690.11	MFS_1	Major Facilitator Superfamily	35	437	136.4	9.1e-40
g1291	Pesta-scaffold00002	PF01494.14	FAD_binding_3	FAD binding domain	108	374	30.8	1.4e-07
g1291	Pesta-scaffold00002	PF13450.1	NAD_binding_8	NAD(P)-binding Rossmann-like domain	9	45	22.7	7.1e-05
g1295	Pesta-scaffold00002	PF11951.3	Fungal_trans_2	Fungal specific transcription factor domain	251	623	86.5	1.3e-24
g1299	Pesta-scaffold00002	PF11807.3	DUF3328	Domain of unknown function (DUF3328)	28	226	82.1	4.4e-23
g1302	Pesta-scaffold00002	PF12796.2	Ank_2	Ankyrin repeats (3 copies)	921	1022	46.7	2.8e-12
g1302	Pesta-scaffold00002	PF14420.1	Clr5	Clr5 domain	1	54	40.9	1.3e-10
g1302	Pesta-scaffold00002	PF00023.25	Ank	Ankyrin repeat	1026	1055	19.7	0.00049
g1303	Pesta-scaffold00002	PF01546.23	Peptidase_M20	Peptidase family M20/M25/M40	88	408	86.4	1.7e-24
g1303	Pesta-scaffold00002	PF07687.9	M20_dimer	Peptidase dimerisation domain	190	305	23.2	4.3e-05
g1305	Pesta-scaffold00002	PF07690.11	MFS_1	Major Facilitator Superfamily	65	437	80.5	8.7e-23
g1307	Pesta-scaffold00002	PF00909.16	Ammonium_transp	Ammonium Transporter Family	276	690	233.6	2.5e-69
g1309	Pesta-scaffold00002	PF14420.1	Clr5	Clr5 domain	31	83	56	2.6e-15
g1314	Pesta-scaffold00002	PF00324.16	AA_permease	Amino acid permease	65	520	415.2	2.4e-124
g1316	Pesta-scaffold00002	PF01068.16	DNA_ligase_A_M	ATP dependent DNA ligase domain	438	629	158	1.8e-46
g1316	Pesta-scaffold00002	PF04675.9	DNA_ligase_A_N	DNA ligase N terminus	179	359	137.3	4.3e-40
g1316	Pesta-scaffold00002	PF04679.10	DNA_ligase_A_C	ATP dependent DNA ligase C terminal region	712	855	56.1	3.5e-15
g1317	Pesta-scaffold00002	PF01263.15	Aldose_epim	Aldose 1-epimerase	3	337	185.8	9.1e-55
g1319	Pesta-scaffold00002	PF12597.3	DUF3767	Protein of unknown function (DUF3767)	39	164	123.6	3.1e-36
g1320	Pesta-scaffold00002	PF08490.7	DUF1744	Domain of unknown function (DUF1744)	1525	1917	516.1	4.4e-155
g1320	Pesta-scaffold00002	PF03104.14	DNA_pol_B_exo1	DNA polymerase family B, exonuclease domain	98	441	217.3	2.3e-64
g1320	Pesta-scaffold00002	PF00136.16	DNA_pol_B	DNA polymerase family B	627	1165	80.7	9.3e-23
g1326	Pesta-scaffold00002	PF00891.13	Methyltransf_2	O-methyltransferase	167	374	98.9	2.4e-28
g1328	Pesta-scaffold00002	PF09362.5	DUF1996	Domain of unknown function (DUF1996)	39	296	283.9	9.8e-85
g1329	Pesta-scaffold00002	PF02982.9	Scytalone_dh	Scytalone dehydratase	12	178	62	4.5e-17
g1330	Pesta-scaffold00002	PF01494.14	FAD_binding_3	FAD binding domain	6	261	39.2	4e-10
g1332	Pesta-scaffold00002	PF00106.20	adh_short	short chain dehydrogenase	28	201	94.1	8e-27
g1334	Pesta-scaffold00002	PF06609.8	TRI12	Fungal trichothecene efflux pump (TRI12)	16	498	96.6	9.9e-28
g1336	Pesta-scaffold00002	PF02996.12	Prefoldin	Prefoldin subunit	56	178	115	1.4e-33
g1337	Pesta-scaffold00002	PF00650.15	CRAL_TRIO	CRAL/TRIO domain	105	271	122.2	1.3e-35
g1337	Pesta-scaffold00002	PF03765.10	CRAL_TRIO_N	CRAL/TRIO, N-terminal domain	32	83	37.3	2.1e-09
g1338	Pesta-scaffold00002	PF08641.7	Mis14	Kinetochore protein Mis14 like	68	220	23.5	4.3e-05
g1339	Pesta-scaffold00002	PF06985.6	HET	Heterokaryon incompatibility protein (HET)	397	499	71.2	9.3e-20
g1341	Pesta-scaffold00002	PF00840.15	Glyco_hydro_7	Glycosyl hydrolase family 7	19	445	623.7	1.1e-187
g1344	Pesta-scaffold00002	PF01266.19	DAO	FAD dependent oxidoreductase	121	493	174.9	2.1e-51
g1347	Pesta-scaffold00002	PF00583.19	Acetyltransf_1	Acetyltransferase (GNAT) family	68	145	51.5	7.4e-14
g1348	Pesta-scaffold00002	PF00176.18	SNF2_N	SNF2 family N-terminal domain	370	665	41.8	5.5e-11
g1350	Pesta-scaffold00002	PF07690.11	MFS_1	Major Facilitator Superfamily	19	337	80.8	7.2e-23
g1351	Pesta-scaffold00002	PF00291.20	PALP	Pyridoxal-phosphate dependent enzyme	10	299	180.8	3.4e-53
g1354	Pesta-scaffold00002	PF07717.11	OB_NTP_bind	Oligonucleotide/oligosaccharide-binding (OB)-fold	566	688	45.6	5.1e-12
g1354	Pesta-scaffold00002	PF00270.24	DEAD	DEAD/DEAH box helicase	46	207	34.5	1.2e-08
g1354	Pesta-scaffold00002	PF04408.18	HA2	Helicase associated domain (HA2)	431	524	31.1	1.7e-07
g1354	Pesta-scaffold00002	PF00271.26	Helicase_C	Helicase conserved C-terminal domain	279	370	26.1	5.4e-06
g1360	Pesta-scaffold00002	PF00067.17	p450	Cytochrome P450	37	507	226.3	5.3e-67
g1363	Pesta-scaffold00002	PF07690.11	MFS_1	Major Facilitator Superfamily	69	522	68.7	3.5e-19
g1365	Pesta-scaffold00002	PF14226.1	DIOX_N	non-haem dioxygenase in morphine synthesis N-terminal	6	131	102.9	1.4e-29
g1365	Pesta-scaffold00002	PF03171.15	2OG-FeII_Oxy	2OG-Fe(II) oxygenase superfamily	181	284	82.6	1.9e-23
g1367	Pesta-scaffold00002	PF00848.14	Ring_hydroxyl_A	Ring hydroxylating alpha subunit (catalytic domain)	211	387	116.6	1.1e-33
g1367	Pesta-scaffold00002	PF00355.21	Rieske	Rieske [2Fe-2S] domain	72	175	52.6	2.5e-14
g1368	Pesta-scaffold00002	PF01494.14	FAD_binding_3	FAD binding domain	32	381	247.2	2.4e-73
g1368	Pesta-scaffold00002	PF07976.7	Phe_hydrox_dim	Phenol hydroxylase, C-terminal dimerisation domain	406	586	107.5	5.2e-31
g1369	Pesta-scaffold00002	PF01425.16	Amidase	Amidase	56	515	332	5.1e-99
g1370	Pesta-scaffold00002	PF13561.1	adh_short_C2	Enoyl-(Acyl carrier protein) reductase	15	249	95.5	4e-27
g1371	Pesta-scaffold00002	PF01522.16	Polysacc_deac_1	Polysaccharide deacetylase	370	494	70.3	1.1e-19
g1372	Pesta-scaffold00002	PF04082.13	Fungal_trans	Fungal specific transcription factor domain	385	660	146.2	7.8e-43
g1373	Pesta-scaffold00002	PF01494.14	FAD_binding_3	FAD binding domain	5	175	46.2	3e-12
g1374	Pesta-scaffold00002	PF00724.15	Oxidored_FMN	NADH:flavin oxidoreductase / NADH oxidase family	18	379	299.5	2.6e-89
g1375	Pesta-scaffold00002	PF06985.6	HET	Heterokaryon incompatibility protein (HET)	27	149	68.9	4.8e-19
g1375	Pesta-scaffold00002	PF13424.1	TPR_12	Tetratricopeptide repeat	681	761	55.7	3.4e-15
g1375	Pesta-scaffold00002	PF00931.17	NB-ARC	NB-ARC domain	257	515	40	1.9e-10
g1376	Pesta-scaffold00002	PF02805.11	Ada_Zn_binding	Metal binding domain of Ada	319	384	102.8	5e-30
g1377	Pesta-scaffold00002	PF01613.13	Flavin_Reduct	Flavin reductase like domain	17	201	54.3	1.3e-14
g1380	Pesta-scaffold00002	PF12695.2	Abhydrolase_5	Alpha/beta hydrolase family	51	260	54.6	9.4e-15
g1383	Pesta-scaffold00002	PF00102.22	Y_phosphatase	Protein-tyrosine phosphatase	246	511	176.9	3.8e-52
g1385	Pesta-scaffold00002	PF04248.7	DUF427	Domain of unknown function (DUF427)	160	257	85.9	1.1e-24
g1387	Pesta-scaffold00002	PF11704.3	Folliculin	Vesicle coat protein involved in Golgi to plasma membrane transport	266	533	90.6	7.6e-26
g1389	Pesta-scaffold00002	PF00004.24	AAA	ATPase family associated with various cellular activities (AAA)	202	335	152.7	5.5e-45
g1393	Pesta-scaffold00002	PF04117.7	Mpv17_PMP22	Mpv17 / PMP22 family	135	210	59.3	2.1e-16
g1395	Pesta-scaffold00002	PF13738.1	Pyr_redox_3	Pyridine nucleotide-disulphide oxidoreductase	29	262	76.3	3.2e-21
g1396	Pesta-scaffold00002	PF06966.7	DUF1295	Protein of unknown function (DUF1295)	123	274	54.8	7.4e-15
g1397	Pesta-scaffold00002	PF00141.18	peroxidase	Peroxidase	107	333	82.1	3.9e-23
g1401	Pesta-scaffold00002	PF00083.19	Sugar_tr	Sugar (and other) transporter	11	454	348.6	4.1e-104
g1402	Pesta-scaffold00002	PF00067.17	p450	Cytochrome P450	42	441	94.4	5.3e-27
g1409	Pesta-scaffold00002	PF08125.8	Mannitol_dh_C	Mannitol dehydrogenase C-terminal domain	231	479	258.8	3.6e-77
g1409	Pesta-scaffold00002	PF01232.18	Mannitol_dh	Mannitol dehydrogenase Rossmann domain	39	203	167	2.6e-49
g1410	Pesta-scaffold00002	PF00067.17	p450	Cytochrome P450	66	545	146.6	7.8e-43
g1411	Pesta-scaffold00002	PF13489.1	Methyltransf_23	Methyltransferase domain	14	190	46.6	2.9e-12
g1413	Pesta-scaffold00002	PF01764.20	Lipase_3	Lipase (class 3)	79	216	112.2	1.3e-32
g1415	Pesta-scaffold00002	PF13602.1	ADH_zinc_N_2	Zinc-binding dehydrogenase	196	331	50.9	2.7e-13
g1416	Pesta-scaffold00002	PF00067.17	p450	Cytochrome P450	86	510	201.7	1.5e-59
g1421	Pesta-scaffold00002	PF01661.16	Macro	Macro domain	123	252	93	1.1e-26
g1422	Pesta-scaffold00002	PF12697.2	Abhydrolase_6	Alpha/beta hydrolase family	30	326	116.4	1.7e-33
g1423	Pesta-scaffold00002	PF07859.8	Abhydrolase_3	alpha/beta hydrolase fold	46	254	52.1	5.8e-14
g1425	Pesta-scaffold00002	PF04266.9	ASCH	ASCH domain	41	149	35.8	8e-09
g1427	Pesta-scaffold00002	PF00069.20	Pkinase	Protein kinase domain	42	421	77.4	9.3e-22
g1431	Pesta-scaffold00002	PF05729.7	NACHT	NACHT domain	251	434	30.3	2.8e-07
g1433	Pesta-scaffold00002	PF00293.23	NUDIX	NUDIX domain	57	179	56.6	2e-15
g1435	Pesta-scaffold00002	PF02475.11	Met_10	Met-10+ like-protein	203	293	25.5	8.1e-06
g1437	Pesta-scaffold00002	PF13405.1	EF-hand_6	EF-hand domain	97	130	18.1	0.0016
g1438	Pesta-scaffold00002	PF05460.8	ORC6	Origin recognition complex subunit 6 (ORC6)	9	348	138.3	3e-40
g1441	Pesta-scaffold00002	PF03169.10	OPT	OPT oligopeptide transporter protein	83	745	441.6	4.3e-132
g1442	Pesta-scaffold00002	PF00106.20	adh_short	short chain dehydrogenase	31	199	88.5	4.4e-25
g1444	Pesta-scaffold00002	PF00172.13	Zn_clus	Fungal Zn(2)-Cys(6) binuclear cluster domain	44	81	37	2.2e-09
g1446	Pesta-scaffold00002	PF01494.14	FAD_binding_3	FAD binding domain	6	227	43.8	1.6e-11
g1447	Pesta-scaffold00002	PF07690.11	MFS_1	Major Facilitator Superfamily	48	416	108.9	2.1e-31
g1452	Pesta-scaffold00002	PF04828.9	GFA	Glutathione-dependent formaldehyde-activating enzyme	38	137	62.7	2.3e-17
g1455	Pesta-scaffold00002	PF00686.14	CBM_20	Starch binding domain	292	388	108.8	7.5e-32
g1455	Pesta-scaffold00002	PF03067.10	Chitin_bind_3	Chitin binding domain	18	248	29	1.1e-06
g1458	Pesta-scaffold00002	PF12697.2	Abhydrolase_6	Alpha/beta hydrolase family	156	390	35.8	7e-09
g1461	Pesta-scaffold00002	PF14420.1	Clr5	Clr5 domain	11	64	62.9	1.9e-17
g1463	Pesta-scaffold00002	PF00067.17	p450	Cytochrome P450	41	509	238.3	1.2e-70
g1465	Pesta-scaffold00002	PF01408.17	GFO_IDH_MocA	Oxidoreductase family, NAD-binding Rossmann fold	31	139	73.8	1.5e-20
g1466	Pesta-scaffold00002	PF00264.15	Tyrosinase	Common central domain of tyrosinase	150	379	147.4	6.7e-43
g1467	Pesta-scaffold00002	PF07883.6	Cupin_2	Cupin domain	14	86	34.3	1.2e-08
g1469	Pesta-scaffold00002	PF06172.6	Cupin_5	Cupin superfamily (DUF985)	34	167	121.5	2.3e-35
g1475	Pesta-scaffold00002	PF07690.11	MFS_1	Major Facilitator Superfamily	100	387	52.2	3.6e-14
g1476	Pesta-scaffold00002	PF14226.1	DIOX_N	non-haem dioxygenase in morphine synthesis N-terminal	606	722	69.9	2.5e-19
g1476	Pesta-scaffold00002	PF03171.15	2OG-FeII_Oxy	2OG-Fe(II) oxygenase superfamily	765	875	44.1	1.9e-11
g1479	Pesta-scaffold00002	PF07534.11	TLD	TLD	320	406	44.8	1.1e-11
g1481	Pesta-scaffold00002	PF00106.20	adh_short	short chain dehydrogenase	5	194	35.4	9.3e-09
g1483	Pesta-scaffold00002	PF00069.20	Pkinase	Protein kinase domain	23	311	248.8	4.7e-74
g1485	Pesta-scaffold00002	PF04811.10	Sec23_trunk	Sec23/Sec24 trunk domain	421	663	238.7	5.6e-71
g1485	Pesta-scaffold00002	PF04815.10	Sec23_helical	Sec23/Sec24 helical domain	763	864	78.5	2.1e-22
g1485	Pesta-scaffold00002	PF08033.7	Sec23_BS	Sec23/Sec24 beta-sandwich domain	668	751	65.1	6.1e-18
g1485	Pesta-scaffold00002	PF04810.10	zf-Sec23_Sec24	Sec23/Sec24 zinc finger	346	385	61.6	3.4e-17
g1485	Pesta-scaffold00002	PF00626.17	Gelsolin	Gelsolin repeat	887	962	38.5	6.5e-10
g1488	Pesta-scaffold00002	PF11951.3	Fungal_trans_2	Fungal specific transcription factor domain	117	316	33.9	1.2e-08
g1488	Pesta-scaffold00002	PF00172.13	Zn_clus	Fungal Zn(2)-Cys(6) binuclear cluster domain	9	46	27.1	2.8e-06
g1490	Pesta-scaffold00002	PF02602.10	HEM4	Uroporphyrinogen-III synthase HemD	31	298	118.8	2.1e-34
g1492	Pesta-scaffold00002	PF04777.8	Evr1_Alr	Erv1 / Alr family	100	193	95.5	1.3e-27
g1493	Pesta-scaffold00002	PF03813.9	Nrap	Nrap protein	124	1063	964	6.4e-290
g1494	Pesta-scaffold00002	PF01144.18	CoA_trans	Coenzyme A transferase	42	272	206.7	2.3e-61
g1495	Pesta-scaffold00002	PF09347.5	DUF1989	Domain of unknown function (DUF1989)	52	230	161.6	1.1e-47
g1498	Pesta-scaffold00002	PF01088.16	Peptidase_C12	Ubiquitin carboxyl-terminal hydrolase, family 1	158	321	128	2.6e-37
g1501	Pesta-scaffold00002	PF01557.13	FAA_hydrolase	Fumarylacetoacetate (FAA) hydrolase family	681	894	122.9	1.2e-35
g1501	Pesta-scaffold00002	PF02776.13	TPP_enzyme_N	Thiamine pyrophosphate enzyme, N-terminal TPP binding domain	17	191	113.3	7.8e-33
g1501	Pesta-scaffold00002	PF00205.17	TPP_enzyme_M	Thiamine pyrophosphate enzyme, central domain	213	378	97.2	6.1e-28
g1501	Pesta-scaffold00002	PF02775.16	TPP_enzyme_C	Thiamine pyrophosphate enzyme, C-terminal TPP binding domain	398	556	49.3	3.6e-13
g1502	Pesta-scaffold00002	PF13369.1	Transglut_core2	Transglutaminase-like superfamily	205	378	42.4	4.6e-11
g1502	Pesta-scaffold00002	PF12937.2	F-box-like	F-box-like	5	52	38.8	5.2e-10
g1502	Pesta-scaffold00002	PF08755.6	YccV-like	Hemimethylated DNA-binding protein YccV like	518	626	35.4	7.5e-09
g1504	Pesta-scaffold00002	PF07989.6	Microtub_assoc	Microtubule associated	221	295	94.2	3e-27
g1504	Pesta-scaffold00002	PF10495.4	PACT_coil_coil	Pericentrin-AKAP-450 domain of centrosomal targeting protein	1326	1428	41	1.3e-10
g1507	Pesta-scaffold00002	PF00656.17	Peptidase_C14	Caspase domain	136	424	242.2	6.2e-72
g1512	Pesta-scaffold00002	PF08528.6	Whi5	Whi5 like	28	52	34.3	1.2e-08
g1513	Pesta-scaffold00002	PF12044.3	Metallopep	Putative peptidase family	115	545	568.4	6.5e-171
g1513	Pesta-scaffold00002	PF01419.12	Jacalin	Jacalin-like lectin domain	654	779	24.4	2.1e-05
g1515	Pesta-scaffold00002	PF01066.16	CDP-OH_P_transf	CDP-alcohol phosphatidyltransferase	44	166	50.4	2e-13
g1518	Pesta-scaffold00002	PF00587.20	tRNA-synt_2b	tRNA synthetase class II core domain (G, H, P, S and T)	358	525	147	3.7e-43
g1518	Pesta-scaffold00002	PF03129.15	HGTP_anticodon	Anticodon binding domain	687	781	66.3	1.6e-18
g1518	Pesta-scaffold00002	PF07973.9	tRNA_SAD	Threonyl and Alanyl tRNA synthetase second additional domain	255	304	41.9	6.3e-11
g1518	Pesta-scaffold00002	PF02824.16	TGS	TGS domain	84	147	39.9	2.7e-10
g1519	Pesta-scaffold00002	PF04410.9	Gar1	Gar1/Naf1 RNA binding region	16	173	142.6	6.3e-42
g1521	Pesta-scaffold00002	PF04109.11	APG9	Autophagy protein Apg9	310	696	486.4	4.5e-146
g1523	Pesta-scaffold00002	PF06419.6	COG6	Conserved oligomeric complex COG6	59	706	756.5	1.6e-227
g1524	Pesta-scaffold00002	PF07690.11	MFS_1	Major Facilitator Superfamily	335	749	152.2	1.4e-44
g1529	Pesta-scaffold00002	PF02926.12	THUMP	THUMP domain	130	280	40.4	2.4e-10
g1530	Pesta-scaffold00002	PF02450.10	LCAT	Lecithin:cholesterol acyltransferase	149	590	313	2.7e-93
g1532	Pesta-scaffold00002	PF00583.19	Acetyltransf_1	Acetyltransferase (GNAT) family	63	147	68.7	3.2e-19
g1534	Pesta-scaffold00002	PF08939.5	DUF1917	Domain of unknown function (DUF1917)	37	299	209.3	6.8e-62
g1536	Pesta-scaffold00002	PF03810.14	IBN_N	Importin-beta N-terminal domain	51	117	28.1	1.3e-06
g1536	Pesta-scaffold00002	PF08389.7	Xpo1	Exportin 1-like protein	124	202	26.3	5.6e-06
g1538	Pesta-scaffold00002	PF09431.5	DUF2013	Protein of unknown function (DUF2013)	186	335	168.9	5e-50
g1540	Pesta-scaffold00002	PF00169.24	PH	PH domain	498	600	36.7	3.7e-09
g1545	Pesta-scaffold00002	PF03587.9	EMG1	EMG1/NEP1 methyltransferase	38	247	259.9	1.1e-77
g1546	Pesta-scaffold00002	PF00106.20	adh_short	short chain dehydrogenase	29	170	66.1	3.3e-18
g1550	Pesta-scaffold00002	PF00004.24	AAA	ATPase family associated with various cellular activities (AAA)	531	677	133.2	6.3e-39
g1550	Pesta-scaffold00002	PF09336.5	Vps4_C	Vps4 C terminal oligomerisation domain	739	780	24.9	1.4e-05
g1553	Pesta-scaffold00002	PF07093.6	SGT1	SGT1 protein	33	595	450	1.1e-134
g1554	Pesta-scaffold00002	PF02463.14	SMC_N	RecF/RecN/SMC N terminal domain	127	1145	80.6	8.9e-23
g1554	Pesta-scaffold00002	PF06470.8	SMC_hinge	SMC proteins Flexible Hinge Domain	577	694	23.1	5.5e-05
g1556	Pesta-scaffold00002	PF08511.6	COQ9	COQ9	154	232	88.3	1.6e-25
g1557	Pesta-scaffold00002	PF00076.17	RRM_1	RNA recognition motif. (a.k.a. RRM, RBD, or RNP domain)	345	414	57.6	7e-16
g1557	Pesta-scaffold00002	PF14259.1	RRM_6	RNA recognition motif (a.k.a. RRM, RBD, or RNP domain)	179	251	48.2	7.4e-13
g1559	Pesta-scaffold00002	PF02290.10	SRP14	Signal recognition particle 14kD protein	28	133	82.2	1.7e-23
g1560	Pesta-scaffold00002	PF02854.14	MIF4G	MIF4G domain	355	550	66.6	1.9e-18
g1560	Pesta-scaffold00002	PF02847.12	MA3	MA3 domain	655	775	33.4	2.7e-08
g1562	Pesta-scaffold00002	PF02852.17	Pyr_redox_dim	Pyridine nucleotide-disulphide oxidoreductase, dimerisation domain	389	498	138.7	6.8e-41
g1562	Pesta-scaffold00002	PF07992.9	Pyr_redox_2	Pyridine nucleotide-disulphide oxidoreductase	45	361	126.2	1.4e-36
g1565	Pesta-scaffold00002	PF00487.19	FA_desaturase	Fatty acid desaturase	255	536	131	5e-38
g1565	Pesta-scaffold00002	PF00173.23	Cyt-b5	Cytochrome b5-like Heme/Steroid binding domain	10	83	41.7	7.2e-11
g1566	Pesta-scaffold00002	PF11916.3	Vac14_Fig4_bd	Vacuolar protein 14 C-terminal Fig4p binding	607	787	277.4	3.1e-83
g1566	Pesta-scaffold00002	PF12755.2	Vac14_Fab1_bd	Vacuolar 14 Fab1-binding region	89	185	143.2	2.5e-42
g1568	Pesta-scaffold00002	PF00226.26	DnaJ	DnaJ domain	404	470	82.6	1.1e-23
g1568	Pesta-scaffold00002	PF13414.1	TPR_11	TPR repeat	33	98	39.1	4e-10
g1568	Pesta-scaffold00002	PF13371.1	TPR_9	Tetratricopeptide repeat	167	219	12.4	0.1
g1574	Pesta-scaffold00002	PF00153.22	Mito_carr	Mitochondrial carrier protein	182	273	77.8	3.7e-22
g1577	Pesta-scaffold00002	PF01053.15	Cys_Met_Meta_PP	Cys/Met metabolism PLP-dependent enzyme	278	591	119.6	9e-35
g1578	Pesta-scaffold00002	PF03105.14	SPX	SPX domain	1	383	132.8	1.9e-38
g1578	Pesta-scaffold00002	PF00097.20	zf-C3HC4	Zinc finger, C3HC4 type (RING finger)	416	454	28.8	6.6e-07
g1579	Pesta-scaffold00002	PF00226.26	DnaJ	DnaJ domain	22	85	87	5e-25
g1579	Pesta-scaffold00002	PF12171.3	zf-C2H2_jaz	Zinc-finger double-stranded RNA-binding	315	341	39.3	4.6e-10
g1581	Pesta-scaffold00002	PF03416.14	Peptidase_C54	Peptidase family C54	100	396	306.9	1e-91
g1582	Pesta-scaffold00002	PF01424.17	R3H	R3H domain	569	636	36.2	3.5e-09
g1582	Pesta-scaffold00002	PF01585.18	G-patch	G-patch domain	708	753	31.5	1.1e-07
g1585	Pesta-scaffold00002	PF00125.19	Histone	Core histone H2A/H2B/H3/H4	42	112	76.4	1.3e-21
g1586	Pesta-scaffold00002	PF00125.19	Histone	Core histone H2A/H2B/H3/H4	20	93	89.5	1.1e-25
g1587	Pesta-scaffold00002	PF05347.10	Complex1_LYR	Complex 1 protein (LYR family)	4	64	31.6	1e-07
g1588	Pesta-scaffold00002	PF00198.18	2-oxoacid_dh	2-oxoacid dehydrogenases acyltransferase (catalytic domain)	190	424	268.3	4.2e-80
g1588	Pesta-scaffold00002	PF00364.17	Biotin_lipoyl	Biotin-requiring enzyme	40	113	69.5	1.3e-19
g1593	Pesta-scaffold00003	PF05224.7	NDT80_PhoG	NDT80 / PhoG like DNA-binding family	126	321	144.5	3.5e-42
g1594	Pesta-scaffold00003	PF01412.13	ArfGap	Putative GTPase activating protein for Arf	11	126	119.7	5.1e-35
g1595	Pesta-scaffold00003	PF08294.6	TIM21	TIM21	399	555	140.7	2.5e-41
g1597	Pesta-scaffold00003	PF00439.20	Bromodomain	Bromodomain	285	375	63.5	1.2e-17
g1597	Pesta-scaffold00003	PF00651.26	BTB	BTB/POZ domain	20	124	30.8	2.2e-07
g1598	Pesta-scaffold00003	PF13481.1	AAA_25	AAA domain	45	241	43.4	2.3e-11
g1600	Pesta-scaffold00003	PF13465.1	zf-H2C2_2	Zinc-finger double domain	82	107	26.9	3.8e-06
g1602	Pesta-scaffold00003	PF05057.9	DUF676	Putative serine esterase (DUF676)	429	595	95.4	2.8e-27
g1604	Pesta-scaffold00003	PF01485.16	IBR	IBR domain	414	485	33.1	3.7e-08
g1608	Pesta-scaffold00003	PF00149.23	Metallophos	Calcineurin-like phosphoesterase	44	155	101.6	3.4e-29
g1609	Pesta-scaffold00003	PF00809.17	Pterin_bind	Pterin binding enzyme	242	455	203.9	1.8e-60
g1609	Pesta-scaffold00003	PF01288.15	HPPK	7,8-dihydro-6-hydroxymethylpterin-pyrophosphokinase (HPPK)	61	186	135.2	9.8e-40
g1610	Pesta-scaffold00003	PF03060.10	NMO	Nitronate monooxygenase	8	357	233.8	2.7e-69
g1612	Pesta-scaffold00003	PF13561.1	adh_short_C2	Enoyl-(Acyl carrier protein) reductase	24	291	75.2	6.4e-21
g1613	Pesta-scaffold00003	PF01741.13	MscL	Large-conductance mechanosensitive channel, MscL	28	167	53.8	1.9e-14
g1615	Pesta-scaffold00003	PF06687.7	SUR7	SUR7/PalI family	5	293	99.3	2.1e-28
g1619	Pesta-scaffold00003	PF03663.9	Glyco_hydro_76	Glycosyl hydrolase family 76	20	397	437.5	4.8e-131
g1620	Pesta-scaffold00003	PF00155.16	Aminotran_1_2	Aminotransferase class I and II	32	397	210.8	2.7e-62
g1621	Pesta-scaffold00003	PF00069.20	Pkinase	Protein kinase domain	25	277	109.5	1.5e-31
g1622	Pesta-scaffold00003	PF09286.6	Pro-kuma_activ	Pro-kumamolisin, activation domain	37	180	165	1e-48
g1622	Pesta-scaffold00003	PF00082.17	Peptidase_S8	Subtilase family	391	668	30.7	1.7e-07
g1627	Pesta-scaffold00003	PF00521.15	DNA_topoisoIV	DNA gyrase/topoisomerase IV, subunit A	808	1270	391	6.1e-117
g1627	Pesta-scaffold00003	PF00204.20	DNA_gyraseB	DNA gyrase B	363	535	115.8	1.1e-33
g1627	Pesta-scaffold00003	PF01751.17	Toprim	Toprim domain	558	673	45.9	4.2e-12
g1627	Pesta-scaffold00003	PF02518.21	HATPase_c	Histidine kinase-, DNA gyrase B-, and HSP90-like ATPase	174	294	35.7	5.4e-09
g1630	Pesta-scaffold00003	PF02453.12	Reticulon	Reticulon	74	243	140.5	3.7e-41
g1632	Pesta-scaffold00003	PF00566.13	RabGAP-TBC	Rab-GTPase-TBC domain	272	474	161.5	1.9e-47
g1639	Pesta-scaffold00003	PF01053.15	Cys_Met_Meta_PP	Cys/Met metabolism PLP-dependent enzyme	57	428	458.9	7.8e-138
g1644	Pesta-scaffold00003	PF13738.1	Pyr_redox_3	Pyridine nucleotide-disulphide oxidoreductase	25	230	85.5	4.7e-24
g1646	Pesta-scaffold00003	PF06985.6	HET	Heterokaryon incompatibility protein (HET)	193	352	96	2e-27
g1648	Pesta-scaffold00003	PF07519.6	Tannase	Tannase and feruloyl esterase	61	536	319.1	4.3e-95
g1650	Pesta-scaffold00003	PF07992.9	Pyr_redox_2	Pyridine nucleotide-disulphide oxidoreductase	531	809	65.3	6.4e-18
g1650	Pesta-scaffold00003	PF13489.1	Methyltransf_23	Methyltransferase domain	28	182	29.4	5.5e-07
g1652	Pesta-scaffold00003	PF08241.7	Methyltransf_11	Methyltransferase domain	47	147	43.1	4.4e-11
g1654	Pesta-scaffold00003	PF00155.16	Aminotran_1_2	Aminotransferase class I and II	47	156	22.2	5.4e-05
g1655	Pesta-scaffold00003	PF06609.8	TRI12	Fungal trichothecene efflux pump (TRI12)	149	470	38.2	4.8e-10
g1660	Pesta-scaffold00003	PF04130.8	Spc97_Spc98	Spc97 / Spc98 family	1549	2138	428.5	3e-128
g1660	Pesta-scaffold00003	PF11951.3	Fungal_trans_2	Fungal specific transcription factor domain	380	522	33	2.2e-08
g1660	Pesta-scaffold00003	PF00172.13	Zn_clus	Fungal Zn(2)-Cys(6) binuclear cluster domain	48	84	31	1.6e-07
g1661	Pesta-scaffold00003	PF00227.21	Proteasome	Proteasome subunit	482	672	185.8	4.7e-55
g1661	Pesta-scaffold00003	PF10584.4	Proteasome_A_N	Proteasome subunit A N-terminal signature	459	481	46.9	1.2e-12
g1662	Pesta-scaffold00003	PF05148.10	Methyltransf_8	Hypothetical methyltransferase	195	413	186.5	4.7e-55
g1663	Pesta-scaffold00003	PF09668.5	Asp_protease	Aspartyl protease	159	282	183.1	1.2e-54
g1663	Pesta-scaffold00003	PF00627.26	UBA	UBA/TS-N domain	380	416	31.4	1.1e-07
g1665	Pesta-scaffold00003	PF04082.13	Fungal_trans	Fungal specific transcription factor domain	245	489	121.2	3.3e-35
g1667	Pesta-scaffold00003	PF04987.9	PigN	Phosphatidylinositolglycan class N (PIG-N)	447	921	545.7	6.8e-164
g1667	Pesta-scaffold00003	PF00884.18	Sulfatase	Sulfatase	186	334	34.3	1.3e-08
g1669	Pesta-scaffold00003	PF12539.3	Csm1	Chromosome segregation protein Csm1/Pcs1	391	481	91.1	4.4e-26
g1670	Pesta-scaffold00003	PF00004.24	AAA	ATPase family associated with various cellular activities (AAA)	166	300	128.7	1.5e-37
g1673	Pesta-scaffold00003	PF04161.8	Arv1	Arv1-like family	2	216	164.6	2.7e-48
g1674	Pesta-scaffold00003	PF05493.8	ATP_synt_H	ATP synthase subunit H	39	107	52.5	3.7e-14
g1676	Pesta-scaffold00003	PF03446.10	NAD_binding_2	NAD binding domain of 6-phosphogluconate dehydrogenase	2	171	108.4	3e-31
g1676	Pesta-scaffold00003	PF14833.1	NAD_binding_11	NAD-binding of NADP-dependent 3-hydroxyisobutyrate dehydrogenase	174	296	36.6	3.9e-09
g1678	Pesta-scaffold00003	PF04055.16	Radical_SAM	Radical SAM superfamily	126	297	40.9	2.3e-10
g1678	Pesta-scaffold00003	PF13353.1	Fer4_12	4Fe-4S single cluster domain	118	183	25.2	1.4e-05
g1680	Pesta-scaffold00003	PF07933.9	DUF1681	Protein of unknown function (DUF1681)	16	189	189.4	2.9e-56
g1682	Pesta-scaffold00003	PF05362.8	Lon_C	Lon protease (S16) C-terminal proteolytic domain	869	1078	217	1.5e-64
g1682	Pesta-scaffold00003	PF02190.11	LON	ATP-dependent protease La (LON) domain	177	448	114	6.8e-33
g1682	Pesta-scaffold00003	PF00004.24	AAA	ATPase family associated with various cellular activities (AAA)	599	741	75.3	4.9e-21
g1683	Pesta-scaffold00003	PF00069.20	Pkinase	Protein kinase domain	339	566	38.8	5.4e-10
g1686	Pesta-scaffold00003	PF00487.19	FA_desaturase	Fatty acid desaturase	74	293	60.9	1.2e-16
g1686	Pesta-scaffold00003	PF00173.23	Cyt-b5	Cytochrome b5-like Heme/Steroid binding domain	347	423	58	6e-16
g1687	Pesta-scaffold00003	PF00176.18	SNF2_N	SNF2 family N-terminal domain	478	850	230.3	2.1e-68
g1687	Pesta-scaffold00003	PF00271.26	Helicase_C	Helicase conserved C-terminal domain	1049	1128	39.7	3.2e-10
g1692	Pesta-scaffold00003	PF00454.22	PI3_PI4_kinase	Phosphatidylinositol 3- and 4-kinase	167	562	138.1	3.1e-40
g1693	Pesta-scaffold00003	PF08241.7	Methyltransf_11	Methyltransferase domain	72	166	33.8	3.4e-08
g1695	Pesta-scaffold00003	PF09424.5	YqeY	Yqey-like protein	43	198	84.2	7e-24
g1696	Pesta-scaffold00003	PF10067.4	DUF2306	Predicted membrane protein (DUF2306)	107	215	45.6	5.7e-12
g1698	Pesta-scaffold00003	PF00264.15	Tyrosinase	Common central domain of tyrosinase	105	339	159.5	1.3e-46
g1701	Pesta-scaffold00003	PF07690.11	MFS_1	Major Facilitator Superfamily	16	243	55.6	3.2e-15
g1702	Pesta-scaffold00003	PF03348.10	Serinc	Serine incorporator (Serinc)	59	508	552.1	7e-166
g1705	Pesta-scaffold00003	PF07819.8	PGAP1	PGAP1-like protein	211	457	293.4	1.1e-87
g1707	Pesta-scaffold00003	PF08676.6	MutL_C	MutL C terminal dimerisation domain	837	1005	82.3	2.4e-23
g1707	Pesta-scaffold00003	PF01119.14	DNA_mis_repair	DNA mismatch repair protein, C-terminal domain	242	356	65.9	2.1e-18
g1707	Pesta-scaffold00003	PF13589.1	HATPase_c_3	Histidine kinase-, DNA gyrase B-, and HSP90-like ATPase	22	144	47.7	1.1e-12
g1709	Pesta-scaffold00003	PF11709.3	Mit_ribos_Mrp51	Mitochondrial ribosomal protein subunit	1	386	235.3	9.1e-70
g1711	Pesta-scaffold00003	PF00833.13	Ribosomal_S17e	Ribosomal S17	1	128	193.4	8.6e-58
g1712	Pesta-scaffold00003	PF04181.8	RPAP2_Rtr1	Rtr1/RPAP2 family	85	157	63.5	1.3e-17
g1715	Pesta-scaffold00003	PF00018.23	SH3_1	SH3 domain	9	59	31.4	8.5e-08
g1719	Pesta-scaffold00003	PF04130.8	Spc97_Spc98	Spc97 / Spc98 family	4	623	223.1	5.1e-66
g1720	Pesta-scaffold00003	PF06911.7	Senescence	Senescence-associated protein	265	447	160.5	3.2e-47
g1722	Pesta-scaffold00003	PF04082.13	Fungal_trans	Fungal specific transcription factor domain	127	422	76.2	1.7e-21
g1722	Pesta-scaffold00003	PF00172.13	Zn_clus	Fungal Zn(2)-Cys(6) binuclear cluster domain	26	66	29.3	5.8e-07
g1723	Pesta-scaffold00003	PF00022.14	Actin	Actin	207	568	48.5	4.1e-13
g1725	Pesta-scaffold00003	PF04366.7	DUF500	Family of unknown function (DUF500)	152	280	96.7	6.3e-28
g1731	Pesta-scaffold00003	PF04082.13	Fungal_trans	Fungal specific transcription factor domain	464	752	55.2	4.6e-15
g1731	Pesta-scaffold00003	PF13465.1	zf-H2C2_2	Zinc-finger double domain	180	205	25.3	1.2e-05
g1733	Pesta-scaffold00003	PF06984.8	MRP-L47	Mitochondrial 39-S ribosomal protein L47 (MRP-L47)	98	189	80	8.6e-23
g1734	Pesta-scaffold00003	PF00996.13	GDI	GDP dissociation inhibitor	1	458	605.4	3.8e-182
g1738	Pesta-scaffold00003	PF01702.13	TGT	Queuine tRNA-ribosyltransferase	141	384	294.9	3.4e-88
g1740	Pesta-scaffold00003	PF04434.12	SWIM	SWIM zinc finger	153	187	18.8	0.00077
g1742	Pesta-scaffold00003	PF04851.10	ResIII	Type III restriction enzyme, res subunit	63	233	79.4	2.8e-22
g1742	Pesta-scaffold00003	PF00271.26	Helicase_C	Helicase conserved C-terminal domain	333	410	51.4	7e-14
g1746	Pesta-scaffold00003	PF04433.12	SWIRM	SWIRM domain	143	231	117.1	2.7e-34
g1746	Pesta-scaffold00003	PF00249.26	Myb_DNA-binding	Myb-like DNA-binding domain	411	454	33	4.3e-08
g1747	Pesta-scaffold00003	PF01012.16	ETF	Electron transfer flavoprotein domain	37	191	132.1	1.5e-38
g1747	Pesta-scaffold00003	PF00766.14	ETF_alpha	Electron transfer flavoprotein FAD-binding domain	225	311	121.4	8.8e-36
g1754	Pesta-scaffold00003	PF05577.7	Peptidase_S28	Serine carboxypeptidase S28	54	493	161.3	2.7e-47
g1755	Pesta-scaffold00003	PF10017.4	Methyltransf_33	Histidine-specific methyltransferase, SAM-dependent	229	352	113.9	4.2e-33
g1755	Pesta-scaffold00003	PF03781.11	FGE-sulfatase	Sulfatase-modifying factor enzyme 1	551	877	51.7	7.4e-14
g1755	Pesta-scaffold00003	PF12867.2	DinB_2	DinB superfamily	380	517	26.4	6.6e-06
g1756	Pesta-scaffold00003	PF01008.12	IF-2B	Initiation factor 2 subunit family	46	365	138.7	1.7e-40
g1757	Pesta-scaffold00003	PF08155.6	NOGCT	NOGCT (NUC087) domain	401	455	98.4	1.3e-28
g1757	Pesta-scaffold00003	PF06858.9	NOG1	Nucleolar GTP-binding protein 1 (NOG1)	234	291	86.8	6.2e-25
g1759	Pesta-scaffold00003	PF00583.19	Acetyltransf_1	Acetyltransferase (GNAT) family	151	249	32.7	5.6e-08
g1760	Pesta-scaffold00003	PF00156.22	Pribosyltran	Phosphoribosyl transferase domain	44	170	51.6	6.8e-14
g1762	Pesta-scaffold00003	PF00013.24	KH_1	KH domain	557	619	30.9	1.5e-07
g1762	Pesta-scaffold00003	PF13014.1	KH_3	KH domain	273	324	28.5	8.1e-07
g1765	Pesta-scaffold00003	PF13419.1	HAD_2	Haloacid dehalogenase-like hydrolase	159	334	105.6	3.3e-30
g1766	Pesta-scaffold00003	PF11221.3	Med21	Subunit 21 of Mediator complex	201	338	140.5	3.5e-41
g1767	Pesta-scaffold00003	PF10356.4	DUF2034	Protein of unknown function (DUF2034)	134	237	52.3	3.7e-14
g1768	Pesta-scaffold00003	PF13417.1	GST_N_3	Glutathione S-transferase, N-terminal domain	9	92	48.6	6.8e-13
g1768	Pesta-scaffold00003	PF00043.20	GST_C	Glutathione S-transferase, C-terminal domain	112	204	42.1	6.2e-11
g1775	Pesta-scaffold00003	PF08450.7	SGL	SMP-30/Gluconolaconase/LRE-like region	175	351	38	1.1e-09
g1777	Pesta-scaffold00003	PF12796.2	Ank_2	Ankyrin repeats (3 copies)	177	273	84.5	4.6e-24
g1777	Pesta-scaffold00003	PF13637.1	Ank_4	Ankyrin repeats (many copies)	30	85	35.8	7.6e-09
g1777	Pesta-scaffold00003	PF00023.25	Ank	Ankyrin repeat	137	167	24.2	1.9e-05
g1778	Pesta-scaffold00003	PF10433.4	MMS1_N	Mono-functional DNA-alkylating methyl methanesulfonate N-term	75	585	296.2	2.9e-88
g1778	Pesta-scaffold00003	PF03178.10	CPSF_A	CPSF A subunit region	792	1121	210.6	2.8e-62
g1786	Pesta-scaffold00003	PF00083.19	Sugar_tr	Sugar (and other) transporter	59	562	169.8	7.4e-50
g1787	Pesta-scaffold00003	PF00561.15	Abhydrolase_1	alpha/beta hydrolase fold	328	450	81.9	4.7e-23
g1788	Pesta-scaffold00003	PF11262.3	Tho2	Transcription factor/nuclear export subunit protein 2	1652	1969	246.2	3.4e-73
g1788	Pesta-scaffold00003	PF11732.3	Thoc2	Transcription- and export-related complex subunit	1291	1368	86.8	6e-25
g1790	Pesta-scaffold00003	PF03619.11	Solute_trans_a	Organic solute transporter Ostalpha	55	337	274.8	6.8e-82
g1792	Pesta-scaffold00003	PF01822.14	WSC	WSC domain	26	98	41.6	8.5e-11
g1796	Pesta-scaffold00003	PF02714.10	DUF221	Domain of unknown function DUF221	346	670	344.8	3.5e-103
g1796	Pesta-scaffold00003	PF13967.1	RSN1_TM	Late exocytosis, associated with Golgi transport	17	171	156.3	4.2e-46
g1796	Pesta-scaffold00003	PF12621.3	DUF3779	Phosphate metabolism protein	754	851	96.5	6.1e-28
g1796	Pesta-scaffold00003	PF14703.1	DUF4463	Domain of unknown function (DUF4463)	225	325	78.6	3.7e-22
g1798	Pesta-scaffold00003	PF01990.12	ATP-synt_F	ATP synthase (F/14-kDa) subunit	13	119	107.3	3.8e-31
g1799	Pesta-scaffold00003	PF02221.10	E1_DerP2_DerF2	ML domain	40	167	87.9	6.3e-25
g1800	Pesta-scaffold00003	PF10332.4	DUF2418	Protein of unknown function (DUF2418)	161	266	103.2	6.8e-30
g1803	Pesta-scaffold00003	PF00330.15	Aconitase	Aconitase family (aconitate hydratase)	10	472	597.3	1.5e-179
g1803	Pesta-scaffold00003	PF00694.14	Aconitase_C	Aconitase C-terminal domain	540	664	149	7.4e-44
g1806	Pesta-scaffold00003	PF07993.7	NAD_binding_4	Male sterility protein	11	86	24.3	1.2e-05
g1807	Pesta-scaffold00003	PF05368.8	NmrA	NmrA-like family	12	233	57.4	1.2e-15
g1808	Pesta-scaffold00003	PF00226.26	DnaJ	DnaJ domain	9	72	74.9	3e-21
g1811	Pesta-scaffold00003	PF03941.10	INCENP_ARK-bind	Inner centromere protein, ARK binding region	1218	1275	59.4	2.1e-16
g1813	Pesta-scaffold00003	PF04153.13	NOT2_3_5	NOT2 / NOT3 / NOT5 family	124	248	106.6	8.4e-31
g1815	Pesta-scaffold00003	PF02492.14	cobW	CobW/HypB/UreG, nucleotide-binding domain	33	231	153.1	5e-45
g1815	Pesta-scaffold00003	PF07683.9	CobW_C	Cobalamin synthesis protein cobW C-terminal domain	280	378	24.3	1.9e-05
g1816	Pesta-scaffold00003	PF03637.12	Mob1_phocein	Mob1/phocein family	89	261	96.2	1.6e-27
g1818	Pesta-scaffold00003	PF11951.3	Fungal_trans_2	Fungal specific transcription factor domain	249	626	48.3	5.3e-13
g1818	Pesta-scaffold00003	PF00172.13	Zn_clus	Fungal Zn(2)-Cys(6) binuclear cluster domain	90	128	28.8	8.1e-07
g1820	Pesta-scaffold00003	PF02463.14	SMC_N	RecF/RecN/SMC N terminal domain	5	1160	180.8	2e-53
g1820	Pesta-scaffold00003	PF06470.8	SMC_hinge	SMC proteins Flexible Hinge Domain	510	632	80.7	7.9e-23
g1821	Pesta-scaffold00003	PF03473.12	MOSC	MOSC domain	342	506	55.8	3e-15
g1821	Pesta-scaffold00003	PF03476.11	MOSC_N	MOSC N-terminal beta barrel domain	80	186	42.8	3.6e-11
g1824	Pesta-scaffold00003	PF02845.11	CUE	CUE domain	51	92	41.9	4.7e-11
g1826	Pesta-scaffold00003	PF00270.24	DEAD	DEAD/DEAH box helicase	112	299	132.3	1.1e-38
g1826	Pesta-scaffold00003	PF00271.26	Helicase_C	Helicase conserved C-terminal domain	387	463	72.2	2.3e-20
g1829	Pesta-scaffold00003	PF02893.15	GRAM	GRAM domain	576	643	59.4	1.7e-16
g1832	Pesta-scaffold00003	PF01230.18	HIT	HIT domain	1046	1183	70.9	9.4e-20
g1832	Pesta-scaffold00003	PF00004.24	AAA	ATPase family associated with various cellular activities (AAA)	287	446	42.4	7e-11
g1835	Pesta-scaffold00003	PF02005.11	TRM	N2,N2-dimethylguanosine tRNA methyltransferase	74	613	333.1	1.9e-99
g1836	Pesta-scaffold00003	PF00781.19	DAGK_cat	Diacylglycerol kinase catalytic domain	117	245	23.8	2.2e-05
g1839	Pesta-scaffold00003	PF00005.22	ABC_tran	ABC transporter	530	669	79	3.7e-22
g1839	Pesta-scaffold00003	PF12848.2	ABC_tran_2	ABC transporter	377	465	26.9	3.1e-06
g1840	Pesta-scaffold00003	PF00856.23	SET	SET domain	84	229	34.4	2.4e-08
g1842	Pesta-scaffold00003	PF00083.19	Sugar_tr	Sugar (and other) transporter	27	515	405.1	2.9e-121
g1843	Pesta-scaffold00003	PF00190.17	Cupin_1	Cupin	73	219	46.8	1.8e-12
g1845	Pesta-scaffold00003	PF03856.8	SUN	Beta-glucosidase (SUN family)	63	309	243.2	2.3e-72
g1849	Pesta-scaffold00003	PF00108.18	Thiolase_N	Thiolase, N-terminal domain	36	298	308.4	2.8e-92
g1849	Pesta-scaffold00003	PF02803.13	Thiolase_C	Thiolase, C-terminal domain	307	425	120.6	2.4e-35
g1850	Pesta-scaffold00003	PF07690.11	MFS_1	Major Facilitator Superfamily	109	493	147.9	2.9e-43
g1853	Pesta-scaffold00003	PF13489.1	Methyltransf_23	Methyltransferase domain	78	256	52	6.2e-14
g1855	Pesta-scaffold00003	PF00179.21	UQ_con	Ubiquitin-conjugating enzyme	37	186	147.5	1.5e-43
g1857	Pesta-scaffold00003	PF00225.18	Kinesin	Kinesin motor domain	12	329	371.8	2.1e-111
g1859	Pesta-scaffold00003	PF02269.11	TFIID-18kDa	Transcription initiation factor IID, 18kD subunit	7	98	98.8	1.1e-28
g1860	Pesta-scaffold00003	PF04072.9	LCM	Leucine carboxyl methyltransferase	49	270	80.2	1.3e-22
g1863	Pesta-scaffold00003	PF02902.14	Peptidase_C48	Ulp1 protease family, C-terminal catalytic domain	87	296	24.7	1.5e-05
g1866	Pesta-scaffold00003	PF00083.19	Sugar_tr	Sugar (and other) transporter	1	63	47.8	7.4e-13
g1868	Pesta-scaffold00003	PF00083.19	Sugar_tr	Sugar (and other) transporter	116	373	153.2	8e-45
g1869	Pesta-scaffold00003	PF13561.1	adh_short_C2	Enoyl-(Acyl carrier protein) reductase	31	274	115	4.4e-33
g1870	Pesta-scaffold00003	PF01261.19	AP_endonuc_2	Xylose isomerase-like TIM barrel	28	267	96.1	1.6e-27
g1873	Pesta-scaffold00003	PF04082.13	Fungal_trans	Fungal specific transcription factor domain	157	406	48.2	5.9e-13
g1875	Pesta-scaffold00003	PF13793.1	Pribosyltran_N	N-terminal domain of ribose phosphate pyrophosphokinase	4	120	132.3	5.9e-39
g1875	Pesta-scaffold00003	PF14572.1	Pribosyl_synth	Phosphoribosyl synthetase-associated domain	339	472	64.8	8e-18
g1876	Pesta-scaffold00003	PF07690.11	MFS_1	Major Facilitator Superfamily	53	403	63.8	1.1e-17
g1878	Pesta-scaffold00003	PF12813.2	XPG_I_2	XPG domain containing	168	438	116.9	9.7e-34
g1879	Pesta-scaffold00003	PF04547.7	Anoctamin	Calcium-activated chloride channel	181	651	405.6	2.2e-121
g1882	Pesta-scaffold00003	PF00149.23	Metallophos	Calcineurin-like phosphoesterase	57	241	27.2	2.1e-06
g1884	Pesta-scaffold00003	PF01822.14	WSC	WSC domain	368	445	40.3	2.1e-10
g1884	Pesta-scaffold00003	PF00722.16	Glyco_hydro_16	Glycosyl hydrolases family 16	32	163	33.9	1.8e-08
g1885	Pesta-scaffold00003	PF00755.15	Carn_acyltransf	Choline/Carnitine o-acyltransferase	70	636	588.6	9.8e-177
g1886	Pesta-scaffold00003	PF01213.14	CAP_N	Adenylate cyclase associated (CAP) N terminal	37	386	298.7	4.7e-89
g1886	Pesta-scaffold00003	PF08603.6	CAP_C	Adenylate cyclase associated (CAP) C terminal	394	553	183.9	1.2e-54
g1889	Pesta-scaffold00003	PF00294.19	PfkB	pfkB family carbohydrate kinase	321	402	39.9	2.6e-10
g1891	Pesta-scaffold00003	PF01408.17	GFO_IDH_MocA	Oxidoreductase family, NAD-binding Rossmann fold	4	133	64.5	1.2e-17
g1893	Pesta-scaffold00003	PF06985.6	HET	Heterokaryon incompatibility protein (HET)	83	270	89.1	2.7e-25
g1894	Pesta-scaffold00003	PF00153.22	Mito_carr	Mitochondrial carrier protein	240	333	68	4.2e-19
g1899	Pesta-scaffold00003	PF08491.5	SE	Squalene epoxidase	205	483	295	3.4e-88
g1899	Pesta-scaffold00003	PF01266.19	DAO	FAD dependent oxidoreductase	22	53	35.5	4.8e-09
g1901	Pesta-scaffold00003	PF00535.21	Glycos_transf_2	Glycosyl transferase family 2	104	264	88.5	3.7e-25
g1902	Pesta-scaffold00003	PF14604.1	SH3_9	Variant SH3 domain	815	867	31.1	1.3e-07
g1903	Pesta-scaffold00003	PF04757.9	Pex2_Pex12	Pex2 / Pex12 amino terminal region	24	279	189.6	5.3e-56
g1905	Pesta-scaffold00003	PF00503.15	G-alpha	G-protein alpha subunit	4	344	425.8	1.2e-127
g1906	Pesta-scaffold00003	PF00343.15	Phosphorylase	Carbohydrate phosphorylase	164	879	1056.7	0
g1908	Pesta-scaffold00003	PF12697.2	Abhydrolase_6	Alpha/beta hydrolase family	27	295	65.3	7.1e-18
g1909	Pesta-scaffold00003	PF07971.7	Glyco_hydro_92	Glycosyl hydrolase family 92	248	742	509.6	8.3e-153
g1915	Pesta-scaffold00003	PF15469.1	Sec5	Exocyst complex component Sec5	155	414	125.5	1.9e-36
g1916	Pesta-scaffold00003	PF00180.15	Iso_dh	Isocitrate/isopropylmalate dehydrogenase	42	367	336.3	1.7e-100
g1921	Pesta-scaffold00003	PF04450.7	BSP	Peptidase of plants and bacteria	70	283	228.6	4.7e-68
g1922	Pesta-scaffold00003	PF12348.3	CLASP_N	CLASP N terminal	257	483	287.8	4.5e-86
g1925	Pesta-scaffold00003	PF00620.22	RhoGAP	RhoGAP domain	954	1107	157.8	1.5e-46
g1925	Pesta-scaffold00003	PF00412.17	LIM	LIM domain	17	65	30.5	2.7e-07
g1929	Pesta-scaffold00003	PF13915.1	DUF4210	Domain of unknown function (DUF4210)	375	449	88.7	2.1e-25
g1929	Pesta-scaffold00003	PF13889.1	Chromosome_seg	Chromosome segregation during meiosis	586	639	72	2.6e-20
g1932	Pesta-scaffold00003	PF01083.17	Cutinase	Cutinase	114	281	136.7	6.7e-40
g1933	Pesta-scaffold00003	PF13508.1	Acetyltransf_7	Acetyltransferase (GNAT) domain	187	254	32.3	8e-08
g1934	Pesta-scaffold00003	PF03663.9	Glyco_hydro_76	Glycosyl hydrolase family 76	29	395	151.1	5.1e-44
g1936	Pesta-scaffold00003	PF12612.3	TFCD_C	Tubulin folding cofactor D C terminal	967	1149	90.2	1.1e-25
g1940	Pesta-scaffold00003	PF02129.13	Peptidase_S15	X-Pro dipeptidyl-peptidase (S15 family)	32	307	130	1e-37
g1940	Pesta-scaffold00003	PF08530.5	PepX_C	X-Pro dipeptidyl-peptidase C-terminal non-catalytic domain	337	567	106.3	1.9e-30
g1942	Pesta-scaffold00003	PF00067.17	p450	Cytochrome P450	253	456	74.6	5.5e-21
g1944	Pesta-scaffold00003	PF01191.14	RNA_pol_Rpb5_C	RNA polymerase Rpb5, C-terminal domain	152	225	114.1	1.6e-33
g1944	Pesta-scaffold00003	PF03871.9	RNA_pol_Rpb5_N	RNA polymerase Rpb5, N-terminal domain	7	110	93.2	9.3e-27
g1948	Pesta-scaffold00003	PF01018.17	GTP1_OBG	GTP1/OBG	79	184	94.7	4.2e-27
g1948	Pesta-scaffold00003	PF01926.18	MMR_HSR1	50S ribosome-binding GTPase	325	496	77.5	7.1e-22
g1951	Pesta-scaffold00003	PF01189.12	Nol1_Nop2_Fmu	NOL1/NOP2/sun family	300	378	64.2	1.2e-17
g1952	Pesta-scaffold00003	PF00596.16	Aldolase_II	Class II Aldolase and Adducin N-terminal domain	46	228	149.5	7.6e-44
g1955	Pesta-scaffold00003	PF04191.8	PEMT	Phospholipid methyltransferase	496	600	121	2e-35
g1958	Pesta-scaffold00003	PF12353.3	eIF3g	Eukaryotic translation initiation factor 3 subunit G	26	156	155.4	6.3e-46
g1958	Pesta-scaffold00003	PF00076.17	RRM_1	RNA recognition motif. (a.k.a. RRM, RBD, or RNP domain)	218	288	56.3	1.8e-15
g1966	Pesta-scaffold00003	PF01535.15	PPR	PPR repeat	527	555	15.6	0.011
g1969	Pesta-scaffold00003	PF10712.4	NAD-GH	NAD-specific glutamate dehydrogenase	784	1308	557	3.8e-167
g1969	Pesta-scaffold00003	PF07732.10	Cu-oxidase_3	Multicopper oxidase	126	244	148.9	4.4e-44
g1969	Pesta-scaffold00003	PF07731.9	Cu-oxidase_2	Multicopper oxidase	520	657	119.6	6.5e-35
g1969	Pesta-scaffold00003	PF00394.17	Cu-oxidase	Multicopper oxidase	251	436	103.2	1.2e-29
g1970	Pesta-scaffold00003	PF00012.15	HSP70	Hsp70 protein	46	648	875.2	1.5e-263
g1971	Pesta-scaffold00003	PF10313.4	DUF2415	Uncharacterised protein domain (DUF2415)	348	388	44.9	6.3e-12
g1972	Pesta-scaffold00003	PF01266.19	DAO	FAD dependent oxidoreductase	33	411	155.5	1.7e-45
g1974	Pesta-scaffold00003	PF14686.1	fn3_3	Polysaccharide lyase family 4, domain II	351	443	36.7	3.3e-09
g1974	Pesta-scaffold00003	PF14683.1	CBM-like	Polysaccharide lyase family 4, domain III	451	655	32.9	4.3e-08
g1977	Pesta-scaffold00003	PF12706.2	Lactamase_B_2	Beta-lactamase superfamily domain	178	421	112.3	1.9e-32
g1978	Pesta-scaffold00003	PF03097.13	BRO1	BRO1-like domain	5	397	430.7	3.7e-129
g1978	Pesta-scaffold00003	PF13949.1	ALIX_LYPXL_bnd	ALIX V-shaped domain binding to HIV	423	753	322.7	1.6e-96
g1979	Pesta-scaffold00003	PF00226.26	DnaJ	DnaJ domain	77	138	81.8	2.1e-23
g1979	Pesta-scaffold00003	PF01556.13	CTDII	DnaJ C terminal domain	382	462	76	1.6e-21
g1979	Pesta-scaffold00003	PF00684.14	DnaJ_CXXCXGXG	DnaJ central domain	253	316	38.2	1e-09
g1981	Pesta-scaffold00003	PF13867.1	SAP30_Sin3_bdg	Sin3 binding region of histone deacetylase complex subunit SAP30	121	163	35.8	5.1e-09
g1982	Pesta-scaffold00003	PF04082.13	Fungal_trans	Fungal specific transcription factor domain	464	765	203.3	2.8e-60
g1982	Pesta-scaffold00003	PF00096.21	zf-C2H2	Zinc finger, C2H2 type	68	92	22	0.00013
g1982	Pesta-scaffold00003	PF13894.1	zf-C2H2_4	C2H2-type zinc finger	98	123	10.8	0.49
g1983	Pesta-scaffold00003	PF12937.2	F-box-like	F-box-like	4	51	31.1	1.3e-07
g1984	Pesta-scaffold00003	PF09794.4	Avl9	Transport protein Avl9	19	210	231.9	7.8e-69
g1986	Pesta-scaffold00003	PF00324.16	AA_permease	Amino acid permease	73	549	348.8	3.3e-104
g1988	Pesta-scaffold00003	PF00069.20	Pkinase	Protein kinase domain	20	299	243.1	2.5e-72
g1989	Pesta-scaffold00003	PF07690.11	MFS_1	Major Facilitator Superfamily	68	477	86	1.9e-24
g1991	Pesta-scaffold00003	PF03619.11	Solute_trans_a	Organic solute transporter Ostalpha	59	310	328.5	3e-98
g1996	Pesta-scaffold00003	PF00583.19	Acetyltransf_1	Acetyltransferase (GNAT) family	53	132	36.1	4.7e-09
g1997	Pesta-scaffold00003	PF00293.23	NUDIX	NUDIX domain	138	281	29	6.4e-07
g1998	Pesta-scaffold00003	PF00009.22	GTP_EFTU	Elongation factor Tu GTP binding domain	48	376	208.3	6.4e-62
g1998	Pesta-scaffold00003	PF03764.13	EFG_IV	Elongation factor G, domain IV	636	753	124.7	1.3e-36
g1998	Pesta-scaffold00003	PF00679.19	EFG_C	Elongation factor G C-terminus	755	842	75.6	1.9e-21
g1998	Pesta-scaffold00003	PF03144.20	GTP_EFTU_D2	Elongation factor Tu domain 2	425	502	49	4.9e-13
g1998	Pesta-scaffold00003	PF14492.1	EFG_II	Elongation Factor G, domain II	517	585	39.2	4.5e-10
g2000	Pesta-scaffold00003	PF08389.7	Xpo1	Exportin 1-like protein	105	248	94.9	4e-27
g2000	Pesta-scaffold00003	PF03810.14	IBN_N	Importin-beta N-terminal domain	33	99	30.9	1.8e-07
g2003	Pesta-scaffold00003	PF01423.17	LSM	LSM domain	22	93	54	8.3e-15
g2004	Pesta-scaffold00003	PF01812.15	5-FTHF_cyc-lig	5-formyltetrahydrofolate cyclo-ligase family	91	329	84.2	9.3e-24
g2005	Pesta-scaffold00003	PF03169.10	OPT	OPT oligopeptide transporter protein	294	1022	691.1	1.3e-207
g2007	Pesta-scaffold00003	PF00328.17	His_Phos_2	Histidine phosphatase superfamily (branch 2)	111	468	156.5	1e-45
g2008	Pesta-scaffold00003	PF00723.16	Glyco_hydro_15	Glycosyl hydrolases family 15	40	462	277.5	1.5e-82
g2008	Pesta-scaffold00003	PF00686.14	CBM_20	Starch binding domain	509	605	62.2	2.6e-17
g2010	Pesta-scaffold00003	PF02535.17	Zip	ZIP Zinc transporter	80	406	190.8	2.8e-56
g2014	Pesta-scaffold00003	PF05729.7	NACHT	NACHT domain	519	668	35	9.8e-09
g2014	Pesta-scaffold00003	PF07819.8	PGAP1	PGAP1-like protein	209	353	28.6	9.3e-07
g2016	Pesta-scaffold00003	PF03881.9	Fructosamin_kin	Fructosamine kinase	16	313	114.8	3.4e-33
g2017	Pesta-scaffold00003	PF07690.11	MFS_1	Major Facilitator Superfamily	308	632	124.2	4.8e-36
g2019	Pesta-scaffold00003	PF12138.3	Spherulin4	Spherulation-specific family 4	669	913	193	5.7e-57
g2020	Pesta-scaffold00003	PF07690.11	MFS_1	Major Facilitator Superfamily	74	447	104.6	4.3e-30
g2022	Pesta-scaffold00003	PF01328.12	Peroxidase_2	Peroxidase, family 2	8	235	120.5	5.6e-35
g2025	Pesta-scaffold00003	PF00172.13	Zn_clus	Fungal Zn(2)-Cys(6) binuclear cluster domain	27	65	27.4	2.3e-06
g2027	Pesta-scaffold00003	PF11790.3	Glyco_hydro_cc	Glycosyl hydrolase catalytic core	613	851	217.3	2e-64
g2029	Pesta-scaffold00003	PF12697.2	Abhydrolase_6	Alpha/beta hydrolase family	48	382	85.3	5.5e-24
g2031	Pesta-scaffold00003	PF13520.1	AA_permease_2	Amino acid permease	83	534	136.4	9.1e-40
g2032	Pesta-scaffold00003	PF00067.17	p450	Cytochrome P450	45	447	122.7	1.4e-35
g2033	Pesta-scaffold00003	PF01432.15	Peptidase_M3	Peptidase family M3	224	696	521.2	2.6e-156
g2036	Pesta-scaffold00003	PF13499.1	EF-hand_7	EF-hand domain pair	11	142	40.5	2.2e-10
g2037	Pesta-scaffold00003	PF08241.7	Methyltransf_11	Methyltransferase domain	215	308	63	2.7e-17
g2038	Pesta-scaffold00003	PF13380.1	CoA_binding_2	CoA binding domain	14	132	91.5	3.8e-26
g2042	Pesta-scaffold00003	PF00487.19	FA_desaturase	Fatty acid desaturase	142	378	44.7	1.1e-11
g2044	Pesta-scaffold00003	PF01368.15	DHH	DHH family	114	257	25.7	7.2e-06
g2046	Pesta-scaffold00003	PF00561.15	Abhydrolase_1	alpha/beta hydrolase fold	150	522	61.4	8.9e-17
g2050	Pesta-scaffold00003	PF02826.14	2-Hacid_dh_C	D-isomer specific 2-hydroxyacid dehydrogenase, NAD binding domain	227	337	104.2	4.2e-30
g2051	Pesta-scaffold00003	PF07690.11	MFS_1	Major Facilitator Superfamily	63	513	111.1	4.4e-32
g2053	Pesta-scaffold00003	PF13561.1	adh_short_C2	Enoyl-(Acyl carrier protein) reductase	14	257	89.1	3.5e-25
g2055	Pesta-scaffold00003	PF06985.6	HET	Heterokaryon incompatibility protein (HET)	163	329	67.6	1.1e-18
g2056	Pesta-scaffold00003	PF00141.18	peroxidase	Peroxidase	55	320	78.1	6.3e-22
g2058	Pesta-scaffold00003	PF00106.20	adh_short	short chain dehydrogenase	26	163	43	4.1e-11
g2059	Pesta-scaffold00003	PF01095.14	Pectinesterase	Pectinesterase	152	383	71.1	5.6e-20
g2060	Pesta-scaffold00003	PF01036.13	Bac_rhodopsin	Bacteriorhodopsin-like protein	52	288	160	5.1e-47
g2065	Pesta-scaffold00003	PF14604.1	SH3_9	Variant SH3 domain	420	470	34.2	1.4e-08
g2067	Pesta-scaffold00003	PF01565.18	FAD_binding_4	FAD binding domain	47	190	76.4	1.4e-21
g2068	Pesta-scaffold00003	PF12697.2	Abhydrolase_6	Alpha/beta hydrolase family	39	264	91	9.9e-26
g2069	Pesta-scaffold00003	PF00106.20	adh_short	short chain dehydrogenase	5	191	74.6	8e-21
g2071	Pesta-scaffold00003	PF13520.1	AA_permease_2	Amino acid permease	59	576	104.9	3.3e-30
g2072	Pesta-scaffold00003	PF00069.20	Pkinase	Protein kinase domain	355	637	49.9	2.2e-13
g2073	Pesta-scaffold00003	PF01791.4	DeoC	DeoC/LacD family aldolase	13	236	139.4	1.1e-40
g2075	Pesta-scaffold00003	PF06985.6	HET	Heterokaryon incompatibility protein (HET)	92	229	25.6	1e-05
g2076	Pesta-scaffold00003	PF00067.17	p450	Cytochrome P450	48	528	73.9	8.9e-21
g2078	Pesta-scaffold00003	PF06985.6	HET	Heterokaryon incompatibility protein (HET)	216	413	101	5.5e-29
g2079	Pesta-scaffold00003	PF03171.15	2OG-FeII_Oxy	2OG-Fe(II) oxygenase superfamily	178	287	56.9	1.8e-15
g2079	Pesta-scaffold00003	PF14226.1	DIOX_N	non-haem dioxygenase in morphine synthesis N-terminal	20	134	33.2	5.8e-08
g2081	Pesta-scaffold00003	PF07690.11	MFS_1	Major Facilitator Superfamily	17	371	84.3	6.2e-24
g2083	Pesta-scaffold00003	PF01370.16	Epimerase	NAD dependent epimerase/dehydratase family	17	228	46.3	3.4e-12
g2085	Pesta-scaffold00003	PF01266.19	DAO	FAD dependent oxidoreductase	7	368	204	2.9e-60
g2087	Pesta-scaffold00003	PF07690.11	MFS_1	Major Facilitator Superfamily	83	493	72	3.6e-20
g2088	Pesta-scaffold00003	PF00848.14	Ring_hydroxyl_A	Ring hydroxylating alpha subunit (catalytic domain)	195	371	130.7	5.5e-38
g2088	Pesta-scaffold00003	PF00355.21	Rieske	Rieske [2Fe-2S] domain	54	155	49.1	3.1e-13
g2090	Pesta-scaffold00003	PF01053.15	Cys_Met_Meta_PP	Cys/Met metabolism PLP-dependent enzyme	24	416	194.7	1.4e-57
g2093	Pesta-scaffold00003	PF14040.1	DNase_NucA_NucB	Deoxyribonuclease NucA/NucB	23	151	37	3e-09
g2096	Pesta-scaffold00003	PF05368.8	NmrA	NmrA-like family	9	269	88.3	4.1e-25
g2097	Pesta-scaffold00003	PF00106.20	adh_short	short chain dehydrogenase	4	180	60.5	1.7e-16
g2099	Pesta-scaffold00003	PF05368.8	NmrA	NmrA-like family	6	245	211	1.4e-62
g2100	Pesta-scaffold00003	PF04082.13	Fungal_trans	Fungal specific transcription factor domain	13	275	84.6	4.7e-24
g2101	Pesta-scaffold00003	PF00106.20	adh_short	short chain dehydrogenase	36	205	87.6	8.2e-25
g2105	Pesta-scaffold00003	PF00150.13	Cellulase	Cellulase (glycosyl hydrolase family 5)	53	338	114.4	5.3e-33
g2105	Pesta-scaffold00003	PF03442.9	CBM_X2	Carbohydrate binding domain X2	378	468	82.3	1.5e-23
g2107	Pesta-scaffold00003	PF00355.21	Rieske	Rieske [2Fe-2S] domain	70	167	42.6	3.2e-11
g2108	Pesta-scaffold00003	PF01480.12	PWI	PWI domain	1048	1119	38.6	8.1e-10
g2109	Pesta-scaffold00003	PF01165.15	Ribosomal_S21	Ribosomal protein S21	703	759	39.5	2.6e-10
g2110	Pesta-scaffold00003	PF00378.15	ECH	Enoyl-CoA hydratase/isomerase family	126	293	117.5	4.9e-34
g2112	Pesta-scaffold00003	PF00295.12	Glyco_hydro_28	Glycosyl hydrolases family 28	85	440	135.8	1.5e-39
g2112	Pesta-scaffold00003	PF09962.4	DUF2196	Uncharacterized conserved protein (DUF2196)	687	746	72.8	1.4e-20
g2117	Pesta-scaffold00003	PF00176.18	SNF2_N	SNF2 family N-terminal domain	423	762	159.9	5.5e-47
g2117	Pesta-scaffold00003	PF00271.26	Helicase_C	Helicase conserved C-terminal domain	1019	1098	40.6	1.7e-10
g2119	Pesta-scaffold00003	PF00117.23	GATase	Glutamine amidotransferase class-I	49	222	41	1.3e-10
g2120	Pesta-scaffold00003	PF11710.3	Git3	G protein-coupled glucose receptor regulating Gpa2	33	227	190.8	1.9e-56
g2120	Pesta-scaffold00003	PF11970.3	Git3_C	G protein-coupled glucose receptor regulating Gpa2 C-term	452	529	70	1e-19
g2122	Pesta-scaffold00003	PF00083.19	Sugar_tr	Sugar (and other) transporter	19	483	281.9	7e-84
g2123	Pesta-scaffold00003	PF00583.19	Acetyltransf_1	Acetyltransferase (GNAT) family	58	154	44.2	1.4e-11
g2124	Pesta-scaffold00003	PF07690.11	MFS_1	Major Facilitator Superfamily	57	397	75.1	3.9e-21
g2125	Pesta-scaffold00003	PF01915.17	Glyco_hydro_3_C	Glycosyl hydrolase family 3 C-terminal domain	375	663	149.4	1.1e-43
g2125	Pesta-scaffold00003	PF00933.16	Glyco_hydro_3	Glycosyl hydrolase family 3 N terminal domain	59	333	144.4	3.5e-42
g2125	Pesta-scaffold00003	PF14310.1	Fn3-like	Fibronectin type III-like domain	717	786	81.4	3.3e-23
g2126	Pesta-scaffold00003	PF12796.2	Ank_2	Ankyrin repeats (3 copies)	1051	1146	55.1	6.7e-15
g2126	Pesta-scaffold00003	PF05729.7	NACHT	NACHT domain	465	657	37.7	1.5e-09
g2128	Pesta-scaffold00003	PF08125.8	Mannitol_dh_C	Mannitol dehydrogenase C-terminal domain	153	379	166.1	7.4e-49
g2128	Pesta-scaffold00003	PF01232.18	Mannitol_dh	Mannitol dehydrogenase Rossmann domain	3	126	69	3.9e-19
g2129	Pesta-scaffold00003	PF04053.9	Coatomer_WDAD	Coatomer WD associated region	318	763	551.4	1.4e-165
g2129	Pesta-scaffold00003	PF00400.27	WD40	WD domain, G-beta repeat	130	169	39.3	3.4e-10
g2132	Pesta-scaffold00003	PF04922.7	DIE2_ALG10	DIE2/ALG10 family	73	394	195.1	1.8e-57
g2134	Pesta-scaffold00003	PF09796.4	QCR10	Ubiquinol-cytochrome-c reductase complex subunit (QCR10)	26	89	72.9	1.1e-20
g2135	Pesta-scaffold00003	PF10018.4	Med4	Vitamin-D-receptor interacting Mediator subunit 4	170	446	138.8	1.2e-40
g2138	Pesta-scaffold00003	PF05199.8	GMC_oxred_C	GMC oxidoreductase	502	641	89.2	2.9e-25
g2138	Pesta-scaffold00003	PF00732.14	GMC_oxred_N	GMC oxidoreductase	128	400	86.9	1.3e-24
g2139	Pesta-scaffold00003	PF05730.6	CFEM	CFEM domain	40	108	32.4	5.7e-08
g2140	Pesta-scaffold00003	PF01485.16	IBR	IBR domain	234	296	29	6.7e-07
g2144	Pesta-scaffold00003	PF12695.2	Abhydrolase_5	Alpha/beta hydrolase family	126	331	56.3	2.7e-15
g2146	Pesta-scaffold00003	PF00106.20	adh_short	short chain dehydrogenase	79	245	72.3	4.2e-20
g2148	Pesta-scaffold00003	PF01494.14	FAD_binding_3	FAD binding domain	6	369	199.3	8.7e-59
g2150	Pesta-scaffold00003	PF01180.16	DHO_dh	Dihydroorotate dehydrogenase	132	416	178.7	1.2e-52
g2152	Pesta-scaffold00003	PF02133.10	Transp_cyt_pur	Permease for cytosine/purines, uracil, thiamine, allantoin	36	489	336.1	2.4e-100
g2153	Pesta-scaffold00003	PF14226.1	DIOX_N	non-haem dioxygenase in morphine synthesis N-terminal	35	152	92.4	2.6e-26
g2153	Pesta-scaffold00003	PF03171.15	2OG-FeII_Oxy	2OG-Fe(II) oxygenase superfamily	211	313	68.7	3.9e-19
g2155	Pesta-scaffold00003	PF00141.18	peroxidase	Peroxidase	38	266	91.4	5.4e-26
g2156	Pesta-scaffold00003	PF05368.8	NmrA	NmrA-like family	10	211	45.9	3.9e-12
g2159	Pesta-scaffold00003	PF04145.10	Ctr	Ctr copper transporter family	46	179	48.2	1e-12
g2162	Pesta-scaffold00003	PF00732.14	GMC_oxred_N	GMC oxidoreductase	450	753	83	2e-23
g2162	Pesta-scaffold00003	PF05199.8	GMC_oxred_C	GMC oxidoreductase	844	980	81.8	5.7e-23
g2162	Pesta-scaffold00003	PF00734.13	CBM_1	Fungal cellulose binding domain	995	1023	42.5	3.4e-11
g2163	Pesta-scaffold00003	PF01263.15	Aldose_epim	Aldose 1-epimerase	27	370	147.1	5.7e-43
g2165	Pesta-scaffold00003	PF00664.18	ABC_membrane	ABC transporter transmembrane region	867	1136	79	3.7e-22
g2165	Pesta-scaffold00003	PF00005.22	ABC_tran	ABC transporter	600	741	70	2.4e-19
g2167	Pesta-scaffold00003	PF04117.7	Mpv17_PMP22	Mpv17 / PMP22 family	179	244	55.9	2.3e-15
g2170	Pesta-scaffold00004	PF06985.6	HET	Heterokaryon incompatibility protein (HET)	20	154	111.1	4.4e-32
g2172	Pesta-scaffold00004	PF01571.16	GCV_T	Aminomethyltransferase folate-binding domain	60	280	41.2	1.1e-10
g2173	Pesta-scaffold00004	PF00582.21	Usp	Universal stress protein family	51	186	52.9	4.1e-14
g2176	Pesta-scaffold00004	PF10255.4	Paf67	RNA polymerase I-associated factor PAF67	76	478	514.8	1.4e-154
g2178	Pesta-scaffold00004	PF00009.22	GTP_EFTU	Elongation factor Tu GTP binding domain	17	381	180.1	2.8e-53
g2178	Pesta-scaffold00004	PF00679.19	EFG_C	Elongation factor G C-terminus	926	1014	55.8	3e-15
g2178	Pesta-scaffold00004	PF03144.20	GTP_EFTU_D2	Elongation factor Tu domain 2	512	590	35.1	1.1e-08
g2178	Pesta-scaffold00004	PF14492.1	EFG_II	Elongation Factor G, domain II	606	678	28.7	8.3e-07
g2181	Pesta-scaffold00004	PF07859.8	Abhydrolase_3	alpha/beta hydrolase fold	97	318	194.7	1.3e-57
g2183	Pesta-scaffold00004	PF08613.6	Cyclin	Cyclin	103	350	54.8	1.3e-14
g2185	Pesta-scaffold00004	PF13738.1	Pyr_redox_3	Pyridine nucleotide-disulphide oxidoreductase	53	257	74.7	9.9e-21
g2188	Pesta-scaffold00004	PF10282.4	Lactonase	Lactonase, 7-bladed beta-propeller	20	307	70.2	1.5e-19
g2190	Pesta-scaffold00004	PF04199.8	Cyclase	Putative cyclase	77	268	45.4	6.7e-12
g2191	Pesta-scaffold00004	PF00069.20	Pkinase	Protein kinase domain	159	443	135.4	1.9e-39
g2191	Pesta-scaffold00004	PF12796.2	Ank_2	Ankyrin repeats (3 copies)	1349	1453	39	7.1e-10
g2191	Pesta-scaffold00004	PF00023.25	Ank	Ankyrin repeat	1300	1332	26.3	4.1e-06
g2192	Pesta-scaffold00004	PF14479.1	HeLo	Prion-inhibition and propagation	2	204	93.2	1.7e-26
g2193	Pesta-scaffold00004	PF12796.2	Ank_2	Ankyrin repeats (3 copies)	162	235	38.4	1.2e-09
g2194	Pesta-scaffold00004	PF12351.3	Fig1	Ca2+ regulator and membrane fusion protein Fig1	51	241	104.4	6.1e-30
g2196	Pesta-scaffold00004	PF00487.19	FA_desaturase	Fatty acid desaturase	81	369	88.1	6e-25
g2198	Pesta-scaffold00004	PF10075.4	PCI_Csn8	COP9 signalosome, subunit CSN8	62	212	129.9	5.7e-38
g2199	Pesta-scaffold00004	PF06415.8	iPGM_N	BPG-independent PGAM N-terminus (iPGM_N)	135	355	253.7	1.2e-75
g2199	Pesta-scaffold00004	PF01676.13	Metalloenzyme	Metalloenzyme superfamily	57	562	233.4	2.5e-69
g2200	Pesta-scaffold00004	PF07544.8	Med9	RNA polymerase II transcription mediator complex subunit 9	64	147	64.1	7.1e-18
g2201	Pesta-scaffold00004	PF07986.7	TBCC	Tubulin binding cofactor C	229	348	108.3	1.4e-31
g2203	Pesta-scaffold00004	PF03473.12	MOSC	MOSC domain	62	187	74.3	6e-21
g2203	Pesta-scaffold00004	PF00111.22	Fer2	2Fe-2S iron-sulfur cluster binding domain	492	564	35.8	4.6e-09
g2209	Pesta-scaffold00004	PF02714.10	DUF221	Domain of unknown function DUF221	339	674	306.8	1.3e-91
g2209	Pesta-scaffold00004	PF13967.1	RSN1_TM	Late exocytosis, associated with Golgi transport	38	187	141.6	1.4e-41
g2209	Pesta-scaffold00004	PF14703.1	DUF4463	Domain of unknown function (DUF4463)	246	320	59.3	3.8e-16
g2213	Pesta-scaffold00004	PF01341.12	Glyco_hydro_6	Glycosyl hydrolases family 6	46	355	322.4	2.8e-96
g2214	Pesta-scaffold00004	PF08639.5	SLD3	DNA replication regulator SLD3	281	820	365.1	5e-109
g2217	Pesta-scaffold00004	PF00069.20	Pkinase	Protein kinase domain	1056	1324	223.3	2.8e-66
g2221	Pesta-scaffold00004	PF08701.6	GN3L_Grn1	GNL3L/Grn1 putative GTPase	19	95	89.4	9.9e-26
g2221	Pesta-scaffold00004	PF01926.18	MMR_HSR1	50S ribosome-binding GTPase	311	451	50.3	2e-13
g2222	Pesta-scaffold00004	PF13419.1	HAD_2	Haloacid dehalogenase-like hydrolase	15	189	60.7	1.9e-16
g2225	Pesta-scaffold00004	PF00046.24	Homeobox	Homeobox domain	67	122	58.9	2.6e-16
g2226	Pesta-scaffold00004	PF00135.23	COesterase	Carboxylesterase family	152	709	313.2	3.3e-93
g2228	Pesta-scaffold00004	PF00300.17	His_Phos_1	Histidine phosphatase superfamily (branch 1)	7	171	55.3	7.7e-15
g2229	Pesta-scaffold00004	PF00010.21	HLH	Helix-loop-helix DNA-binding domain	150	193	33.7	2.1e-08
g2234	Pesta-scaffold00004	PF11635.3	Med16	Mediator complex subunit 16	149	964	338.6	6.2e-101
g2235	Pesta-scaffold00004	PF02146.12	SIR2	Sir2 family	120	340	94.8	4.8e-27
g2236	Pesta-scaffold00004	PF00264.15	Tyrosinase	Common central domain of tyrosinase	70	253	118.7	4e-34
g2238	Pesta-scaffold00004	PF00176.18	SNF2_N	SNF2 family N-terminal domain	458	740	223.2	3e-66
g2238	Pesta-scaffold00004	PF00385.19	Chromo	Chromo (CHRromatin Organisation MOdifier) domain	369	420	58	5.4e-16
g2238	Pesta-scaffold00004	PF00271.26	Helicase_C	Helicase conserved C-terminal domain	800	880	48.6	5.1e-13
g2238	Pesta-scaffold00004	PF13907.1	DUF4208	Domain of unknown function (DUF4208)	1416	1515	30.4	3.3e-07
g2240	Pesta-scaffold00004	PF01846.14	FF	FF domain	449	498	48.1	7.7e-13
g2240	Pesta-scaffold00004	PF00397.21	WW	WW domain	311	340	35.6	5.8e-09
g2241	Pesta-scaffold00004	PF12735.2	Trs65	TRAPP trafficking subunit Trs65	712	1033	243.7	2.5e-72
g2244	Pesta-scaffold00004	PF00122.15	E1-E2_ATPase	E1-E2 ATPase	88	355	215.1	6.2e-64
g2244	Pesta-scaffold00004	PF00689.16	Cation_ATPase_C	Cation transporting ATPase, C-terminus	834	1035	111.4	3.3e-32
g2244	Pesta-scaffold00004	PF00702.21	Hydrolase	haloacid dehalogenase-like hydrolase	359	760	93.1	3.1e-26
g2244	Pesta-scaffold00004	PF00690.21	Cation_ATPase_N	Cation transporter/ATPase, N-terminus	9	77	61.5	3.8e-17
g2250	Pesta-scaffold00004	PF11951.3	Fungal_trans_2	Fungal specific transcription factor domain	414	809	76.5	1.4e-21
g2251	Pesta-scaffold00004	PF01179.15	Cu_amine_oxid	Copper amine oxidase, enzyme domain	224	647	540.6	2e-162
g2251	Pesta-scaffold00004	PF02728.11	Cu_amine_oxidN3	Copper amine oxidase, N3 domain	99	199	63.1	2e-17
g2251	Pesta-scaffold00004	PF02727.11	Cu_amine_oxidN2	Copper amine oxidase, N2 domain	8	94	52.3	4.3e-14
g2253	Pesta-scaffold00004	PF07690.11	MFS_1	Major Facilitator Superfamily	58	471	92.7	1.7e-26
g2254	Pesta-scaffold00004	PF07969.6	Amidohydro_3	Amidohydrolase family	64	512	196.2	9.9e-58
g2255	Pesta-scaffold00004	PF00026.18	Asp	Eukaryotic aspartyl protease	27	380	125.4	2.7e-36
g2256	Pesta-scaffold00004	PF13302.1	Acetyltransf_3	Acetyltransferase (GNAT) domain	5	144	133.3	6.4e-39
g2260	Pesta-scaffold00004	PF00006.20	ATP-synt_ab	ATP synthase alpha/beta family, nucleotide-binding domain	189	295	81.2	7.2e-23
g2260	Pesta-scaffold00004	PF02874.18	ATP-synt_ab_N	ATP synthase alpha/beta family, beta-barrel domain	65	133	56.9	1.7e-15
g2262	Pesta-scaffold00004	PF00006.20	ATP-synt_ab	ATP synthase alpha/beta family, nucleotide-binding domain	1	92	96	2.1e-27
g2262	Pesta-scaffold00004	PF00306.22	ATP-synt_ab_C	ATP synthase alpha/beta chain, C terminal domain	104	222	92.8	1.8e-26
g2263	Pesta-scaffold00004	PF01256.12	Carb_kinase	Carbohydrate kinase	38	324	187.5	2.3e-55
g2267	Pesta-scaffold00004	PF02776.13	TPP_enzyme_N	Thiamine pyrophosphate enzyme, N-terminal TPP binding domain	94	262	186.2	3.2e-55
g2267	Pesta-scaffold00004	PF02775.16	TPP_enzyme_C	Thiamine pyrophosphate enzyme, C-terminal TPP binding domain	503	650	163.1	3.2e-48
g2267	Pesta-scaffold00004	PF00205.17	TPP_enzyme_M	Thiamine pyrophosphate enzyme, central domain	293	439	123.2	6e-36
g2271	Pesta-scaffold00004	PF01210.18	NAD_Gly3P_dh_N	NAD-dependent glycerol-3-phosphate dehydrogenase N-terminus	19	204	153.4	3.7e-45
g2271	Pesta-scaffold00004	PF07479.9	NAD_Gly3P_dh_C	NAD-dependent glycerol-3-phosphate dehydrogenase C-terminus	286	437	137.7	2.3e-40
g2272	Pesta-scaffold00004	PF14701.1	hDGE_amylase	glucanotransferase domain of human glycogen debranching enzyme	143	575	595.1	6.8e-179
g2272	Pesta-scaffold00004	PF06202.9	GDE_C	Amylo-alpha-1,6-glucosidase	1058	1536	384.9	2.9e-115
g2272	Pesta-scaffold00004	PF14702.1	hGDE_central	central domain of human glycogen debranching enzyme	746	991	281.7	4.2e-84
g2272	Pesta-scaffold00004	PF14699.1	hGDE_N	N-terminal domain from the human glycogen debranching enzyme	40	142	89.9	6.8e-26
g2278	Pesta-scaffold00004	PF01968.13	Hydantoinase_A	Hydantoinase/oxoprolinase	214	500	278.8	4.1e-83
g2278	Pesta-scaffold00004	PF02538.9	Hydantoinase_B	Hydantoinase B/oxoprolinase	726	1255	206.8	3.9e-61
g2278	Pesta-scaffold00004	PF05378.8	Hydant_A_N	Hydantoinase/oxoprolinase N-terminal region	10	193	150.7	2.7e-44
g2286	Pesta-scaffold00004	PF00916.15	Sulfate_transp	Sulfate transporter family	376	654	115.3	2.4e-33
g2286	Pesta-scaffold00004	PF00027.24	cNMP_binding	Cyclic nucleotide-binding domain	939	1027	63.6	1.1e-17
g2286	Pesta-scaffold00004	PF01740.16	STAS	STAS domain	715	828	36.5	2.6e-09
g2288	Pesta-scaffold00004	PF05916.6	Sld5	GINS complex protein	89	198	43.9	2.3e-11
g2289	Pesta-scaffold00004	PF01808.13	AICARFT_IMPCHas	AICARFT/IMPCHase bienzyme	134	461	371.7	2.6e-111
g2289	Pesta-scaffold00004	PF02142.17	MGS	MGS-like domain	15	129	81.1	3.9e-23
g2292	Pesta-scaffold00004	PF00400.27	WD40	WD domain, G-beta repeat	263	292	12.4	0.11
g2293	Pesta-scaffold00004	PF04227.7	Indigoidine_A	Indigoidine synthase A like protein	56	351	348.2	3.2e-104
g2293	Pesta-scaffold00004	PF00294.19	PfkB	pfkB family carbohydrate kinase	395	775	91.2	6.2e-26
g2297	Pesta-scaffold00004	PF00106.20	adh_short	short chain dehydrogenase	94	253	101.1	5.7e-29
g2298	Pesta-scaffold00004	PF00106.20	adh_short	short chain dehydrogenase	21	203	73.6	1.7e-20
g2302	Pesta-scaffold00004	PF00012.15	HSP70	Hsp70 protein	106	411	50.4	8e-14
g2305	Pesta-scaffold00004	PF04427.13	Brix	Brix domain	32	236	130	8e-38
g2306	Pesta-scaffold00004	PF08578.5	DUF1765	Protein of unknown function (DUF1765)	744	872	146.8	3e-43
g2310	Pesta-scaffold00004	PF06985.6	HET	Heterokaryon incompatibility protein (HET)	209	359	80.4	1.3e-22
g2320	Pesta-scaffold00004	PF00583.19	Acetyltransf_1	Acetyltransferase (GNAT) family	65	179	30.8	2.1e-07
g2322	Pesta-scaffold00004	PF07690.11	MFS_1	Major Facilitator Superfamily	811	1192	96.8	1e-27
g2322	Pesta-scaffold00004	PF04082.13	Fungal_trans	Fungal specific transcription factor domain	179	427	53	2e-14
g2322	Pesta-scaffold00004	PF00172.13	Zn_clus	Fungal Zn(2)-Cys(6) binuclear cluster domain	14	52	21.1	0.00021
g2323	Pesta-scaffold00004	PF07690.11	MFS_1	Major Facilitator Superfamily	49	452	130.6	5.4e-38
g2324	Pesta-scaffold00004	PF00884.18	Sulfatase	Sulfatase	20	367	212.9	5.8e-63
g2326	Pesta-scaffold00004	PF00732.14	GMC_oxred_N	GMC oxidoreductase	14	319	208.9	8.4e-62
g2326	Pesta-scaffold00004	PF05199.8	GMC_oxred_C	GMC oxidoreductase	427	587	110.8	6.1e-32
g2328	Pesta-scaffold00004	PF01565.18	FAD_binding_4	FAD binding domain	71	207	76.9	9.3e-22
g2331	Pesta-scaffold00004	PF00067.17	p450	Cytochrome P450	81	540	170.7	3.8e-50
g2333	Pesta-scaffold00004	PF14856.1	Hce2	Pathogen effector; putative necrosis-inducing factor	44	142	32.4	6e-08
g2335	Pesta-scaffold00004	PF07690.11	MFS_1	Major Facilitator Superfamily	62	436	123.1	1e-35
g2336	Pesta-scaffold00004	PF00330.15	Aconitase	Aconitase family (aconitate hydratase)	68	517	474.8	2.2e-142
g2336	Pesta-scaffold00004	PF00694.14	Aconitase_C	Aconitase C-terminal domain	600	736	121.4	2.4e-35
g2338	Pesta-scaffold00004	PF04082.13	Fungal_trans	Fungal specific transcription factor domain	6	147	41.8	5.5e-11
g2339	Pesta-scaffold00004	PF00153.22	Mito_carr	Mitochondrial carrier protein	101	195	67.1	8.3e-19
g2340	Pesta-scaffold00004	PF04909.9	Amidohydro_2	Amidohydrolase	14	309	59.1	4.6e-16
g2341	Pesta-scaffold00004	PF03737.10	Methyltransf_6	Demethylmenaquinone methyltransferase	414	569	90.1	1.2e-25
g2341	Pesta-scaffold00004	PF08450.7	SGL	SMP-30/Gluconolaconase/LRE-like region	109	388	44.1	1.5e-11
g2343	Pesta-scaffold00004	PF12796.2	Ank_2	Ankyrin repeats (3 copies)	1107	1239	45.4	7.3e-12
g2343	Pesta-scaffold00004	PF05729.7	NACHT	NACHT domain	106	276	29	6.8e-07
g2344	Pesta-scaffold00004	PF01490.13	Aa_trans	Transmembrane amino acid transporter protein	65	465	201.1	1.9e-59
g2348	Pesta-scaffold00004	PF01977.11	UbiD	3-octaprenyl-4-hydroxybenzoate carboxy-lyase	97	521	438.7	1.4e-131
g2349	Pesta-scaffold00004	PF02441.14	Flavoprotein	Flavoprotein	8	136	101.2	3e-29
g2350	Pesta-scaffold00004	PF04082.13	Fungal_trans	Fungal specific transcription factor domain	239	394	30.5	1.5e-07
g2350	Pesta-scaffold00004	PF00172.13	Zn_clus	Fungal Zn(2)-Cys(6) binuclear cluster domain	36	74	30.3	2.7e-07
g2351	Pesta-scaffold00004	PF00069.20	Pkinase	Protein kinase domain	184	479	74.4	7.4e-21
g2355	Pesta-scaffold00004	PF01636.18	APH	Phosphotransferase enzyme family	40	288	142	2.4e-41
g2356	Pesta-scaffold00004	PF00076.17	RRM_1	RNA recognition motif. (a.k.a. RRM, RBD, or RNP domain)	363	433	47.4	1.1e-12
g2356	Pesta-scaffold00004	PF13893.1	RRM_5	RNA recognition motif. (a.k.a. RRM, RBD, or RNP domain)	495	557	31.3	1.3e-07
g2357	Pesta-scaffold00004	PF07934.7	OGG_N	8-oxoguanine DNA glycosylase, N-terminal domain	11	117	86.5	1.2e-24
g2357	Pesta-scaffold00004	PF00730.20	HhH-GPD	HhH-GPD superfamily base excision DNA repair protein	118	287	57.7	1.1e-15
g2361	Pesta-scaffold00004	PF00565.12	SNase	Staphylococcal nuclease homologue	127	238	81.6	4.1e-23
g2362	Pesta-scaffold00004	PF12768.2	Rax2	Cortical protein marker for cell polarity	944	1216	268.4	6.2e-80
g2365	Pesta-scaffold00004	PF12066.3	DUF3546	Domain of unknown function (DUF3546)	153	262	91	4.3e-26
g2365	Pesta-scaffold00004	PF13821.1	DUF4187	Domain of unknown function (DUF4187)	503	612	84.5	2.7e-24
g2365	Pesta-scaffold00004	PF04959.8	ARS2	Arsenite-resistance protein 2	588	805	42.5	7.8e-11
g2372	Pesta-scaffold00004	PF13848.1	Thioredoxin_6	Thioredoxin-like domain	151	332	134.4	3.8e-39
g2372	Pesta-scaffold00004	PF00085.15	Thioredoxin	Thioredoxin	20	123	111.3	1.5e-32
g2373	Pesta-scaffold00004	PF01979.15	Amidohydro_1	Amidohydrolase family	123	457	84.5	1e-23
g2377	Pesta-scaffold00004	PF03164.9	Mon1	Trafficking protein Mon1	188	616	391.4	3.8e-117
g2380	Pesta-scaffold00004	PF04118.9	Dopey_N	Dopey, N-terminal	38	380	399	9.6e-120
g2383	Pesta-scaffold00004	PF09445.5	Methyltransf_15	RNA cap guanine-N2 methyltransferase	75	244	130.4	4.2e-38
g2385	Pesta-scaffold00004	PF04495.9	GRASP55_65	GRASP55/65 PDZ-like domain	79	212	146.2	5.7e-43
g2387	Pesta-scaffold00004	PF02109.11	DAD	DAD family	49	163	164.4	7.7e-49
g2389	Pesta-scaffold00004	PF03647.8	Tmemb_14	Transmembrane proteins 14C	4	97	74.2	8.1e-21
g2390	Pesta-scaffold00004	PF08583.5	Cmc1	Cytochrome c oxidase biogenesis protein Cmc1 like	1	70	59.4	2.1e-16
g2391	Pesta-scaffold00004	PF01920.15	Prefoldin_2	Prefoldin subunit	18	118	85	2.5e-24
g2393	Pesta-scaffold00004	PF00808.18	CBFD_NFYB_HMF	Histone-like transcription factor (CBF/NF-Y) and archaeal histone	37	98	89.4	1.1e-25
g2395	Pesta-scaffold00004	PF05327.6	RRN3	RNA polymerase I specific transcription initiation factor RRN3	79	665	563	4.9e-169
g2398	Pesta-scaffold00004	PF04438.11	zf-HIT	HIT zinc finger	264	293	37.2	1.5e-09
g2399	Pesta-scaffold00004	PF12796.2	Ank_2	Ankyrin repeats (3 copies)	1127	1218	64	1.2e-17
g2399	Pesta-scaffold00004	PF13857.1	Ank_5	Ankyrin repeats (many copies)	1547	1602	28.2	1.5e-06
g2399	Pesta-scaffold00004	PF00023.25	Ank	Ankyrin repeat	1288	1318	24.4	1.6e-05
g2402	Pesta-scaffold00004	PF00082.17	Peptidase_S8	Subtilase family	737	998	77.2	1.1e-21
g2405	Pesta-scaffold00004	PF07690.11	MFS_1	Major Facilitator Superfamily	214	623	132.5	1.4e-38
g2405	Pesta-scaffold00004	PF08774.6	VRR_NUC	VRR-NUC domain	1458	1570	58.6	4.6e-16
g2408	Pesta-scaffold00004	PF05186.8	Dpy-30	Dpy-30 motif	141	182	47.5	8.3e-13
g2409	Pesta-scaffold00004	PF08069.7	Ribosomal_S13_N	Ribosomal S13/S15 N-terminal domain	1	60	97.2	3.4e-28
g2409	Pesta-scaffold00004	PF00312.17	Ribosomal_S15	Ribosomal protein S15	65	150	79.2	1.4e-22
g2411	Pesta-scaffold00004	PF04003.7	Utp12	Dip2/Utp12 Family	1063	1169	75.3	3e-21
g2411	Pesta-scaffold00004	PF00400.27	WD40	WD domain, G-beta repeat	924	962	35.6	5.3e-09
g2412	Pesta-scaffold00004	PF04045.9	P34-Arc	Arp2/3 complex, 34 kD subunit p34-Arc	51	286	292.5	2e-87
g2414	Pesta-scaffold00004	PF08920.5	SF3b1	Splicing factor 3B subunit 1	240	367	102.5	1.9e-29
g2415	Pesta-scaffold00004	PF13465.1	zf-H2C2_2	Zinc-finger double domain	343	370	24.6	2e-05
g2416	Pesta-scaffold00004	PF13659.1	Methyltransf_26	Methyltransferase domain	203	360	51.3	1e-13
g2418	Pesta-scaffold00004	PF01423.17	LSM	LSM domain	5	70	55.3	3.3e-15
g2419	Pesta-scaffold00004	PF08636.5	Pkr1	ER protein Pkr1	1	75	117.6	1.7e-34
g2422	Pesta-scaffold00004	PF00888.17	Cullin	Cullin family	526	776	160.3	6.6e-47
g2422	Pesta-scaffold00004	PF08672.6	APC2	Anaphase promoting complex (APC) subunit 2	814	872	72.4	2.6e-20
g2426	Pesta-scaffold00004	PF13639.1	zf-RING_2	Ring finger domain	368	418	48.6	5.1e-13
g2429	Pesta-scaffold00004	PF05729.7	NACHT	NACHT domain	306	462	34.1	1.9e-08
g2430	Pesta-scaffold00004	PF13520.1	AA_permease_2	Amino acid permease	525	971	161.6	2.1e-47
g2430	Pesta-scaffold00004	PF01979.15	Amidohydro_1	Amidohydrolase family	61	369	132.5	2.5e-38
g2433	Pesta-scaffold00004	PF00775.16	Dioxygenase_C	Dioxygenase	85	158	29.9	2.9e-07
g2434	Pesta-scaffold00004	PF04757.9	Pex2_Pex12	Pex2 / Pex12 amino terminal region	167	380	148.1	2.6e-43
g2434	Pesta-scaffold00004	PF13923.1	zf-C3HC4_2	Zinc finger, C3HC4 type (RING finger)	453	492	33.7	2.5e-08
g2436	Pesta-scaffold00004	PF03124.9	EXS	EXS family	706	1067	339.5	2e-101
g2436	Pesta-scaffold00004	PF01544.13	CorA	CorA-like Mg2+ transporter protein	377	551	27.3	1.6e-06
g2437	Pesta-scaffold00004	PF01793.11	Glyco_transf_15	Glycolipid 2-alpha-mannosyltransferase	34	350	385.9	1.3e-115
g2440	Pesta-scaffold00004	PF00173.23	Cyt-b5	Cytochrome b5-like Heme/Steroid binding domain	65	165	43.3	2.2e-11
g2442	Pesta-scaffold00004	PF03443.9	Glyco_hydro_61	Glycosyl hydrolase family 61	20	225	131.1	4.9e-38
g2443	Pesta-scaffold00004	PF11374.3	DUF3176	Protein of unknown function (DUF3176)	33	145	97.4	4e-28
g2444	Pesta-scaffold00004	PF07247.7	AATase	Alcohol acetyltransferase	49	503	51.2	7e-14
g2450	Pesta-scaffold00004	PF00135.23	COesterase	Carboxylesterase family	4	526	266.3	5.2e-79
g2451	Pesta-scaffold00004	PF00107.21	ADH_zinc_N	Zinc-binding dehydrogenase	169	260	47.5	1.2e-12
g2451	Pesta-scaffold00004	PF08240.7	ADH_N	Alcohol dehydrogenase GroES-like domain	32	110	24.6	1.5e-05
g2457	Pesta-scaffold00004	PF08241.7	Methyltransf_11	Methyltransferase domain	180	278	79.3	2.3e-22
g2459	Pesta-scaffold00004	PF04082.13	Fungal_trans	Fungal specific transcription factor domain	218	462	87.6	5.9e-25
g2459	Pesta-scaffold00004	PF00172.13	Zn_clus	Fungal Zn(2)-Cys(6) binuclear cluster domain	33	70	35.1	8.8e-09
g2460	Pesta-scaffold00004	PF00724.15	Oxidored_FMN	NADH:flavin oxidoreductase / NADH oxidase family	3	373	240.3	2.6e-71
g2462	Pesta-scaffold00004	PF00296.15	Bac_luciferase	Luciferase-like monooxygenase	16	397	202	1.1e-59
g2463	Pesta-scaffold00004	PF00067.17	p450	Cytochrome P450	49	499	157.1	5.3e-46
g2465	Pesta-scaffold00004	PF00106.20	adh_short	short chain dehydrogenase	5	180	72.6	3.3e-20
g2468	Pesta-scaffold00004	PF05729.7	NACHT	NACHT domain	358	553	32.7	5.2e-08
g2469	Pesta-scaffold00004	PF11374.3	DUF3176	Protein of unknown function (DUF3176)	107	221	101.9	1.6e-29
g2470	Pesta-scaffold00004	PF01426.13	BAH	BAH domain	92	215	28.3	1.2e-06
g2471	Pesta-scaffold00004	PF11951.3	Fungal_trans_2	Fungal specific transcription factor domain	287	441	47.8	7.6e-13
g2471	Pesta-scaffold00004	PF00172.13	Zn_clus	Fungal Zn(2)-Cys(6) binuclear cluster domain	26	64	32.3	6.3e-08
g2472	Pesta-scaffold00004	PF08450.7	SGL	SMP-30/Gluconolaconase/LRE-like region	19	312	93.8	1e-26
g2474	Pesta-scaffold00004	PF01116.15	F_bP_aldolase	Fructose-bisphosphate aldolase class-II	8	288	268.3	6.3e-80
g2474	Pesta-scaffold00004	PF00248.16	Aldo_ket_red	Aldo/keto reductase family	326	604	167.9	1.9e-49
g2475	Pesta-scaffold00004	PF00083.19	Sugar_tr	Sugar (and other) transporter	25	494	290.8	1.4e-86
g2477	Pesta-scaffold00004	PF00106.20	adh_short	short chain dehydrogenase	11	192	86.3	2.1e-24
g2479	Pesta-scaffold00004	PF11700.3	ATG22	Vacuole effluxer Atg22 like	280	810	665.7	2.9e-200
g2481	Pesta-scaffold00004	PF00331.15	Glyco_hydro_10	Glycosyl hydrolase family 10	30	327	350.2	8.8e-105
g2482	Pesta-scaffold00004	PF12223.3	DUF3602	Protein of unknown function (DUF3602)	15	90	38.4	1.2e-09
g2483	Pesta-scaffold00004	PF00043.20	GST_C	Glutathione S-transferase, C-terminal domain	104	203	43.1	2.9e-11
g2483	Pesta-scaffold00004	PF13417.1	GST_N_3	Glutathione S-transferase, N-terminal domain	6	90	33.2	4.5e-08
g2485	Pesta-scaffold00004	PF04082.13	Fungal_trans	Fungal specific transcription factor domain	225	338	32.2	4.7e-08
g2485	Pesta-scaffold00004	PF00172.13	Zn_clus	Fungal Zn(2)-Cys(6) binuclear cluster domain	16	55	24.3	2.1e-05
g2486	Pesta-scaffold00004	PF01494.14	FAD_binding_3	FAD binding domain	13	373	59.7	2.4e-16
g2489	Pesta-scaffold00004	PF00168.25	C2	C2 domain	1099	1181	70.6	7e-20
g2493	Pesta-scaffold00004	PF00067.17	p450	Cytochrome P450	56	503	190.1	4.9e-56
g2494	Pesta-scaffold00004	PF06985.6	HET	Heterokaryon incompatibility protein (HET)	73	272	93.8	9.6e-27
g2494	Pesta-scaffold00004	PF12796.2	Ank_2	Ankyrin repeats (3 copies)	844	936	73.1	1.6e-20
g2494	Pesta-scaffold00004	PF13857.1	Ank_5	Ankyrin repeats (many copies)	960	1012	47.1	1.7e-12
g2494	Pesta-scaffold00004	PF13637.1	Ank_4	Ankyrin repeats (many copies)	607	658	26.8	5.1e-06
g2496	Pesta-scaffold00004	PF00144.19	Beta-lactamase	Beta-lactamase	9	377	129.3	1.5e-37
g2498	Pesta-scaffold00004	PF02434.11	Fringe	Fringe-like	172	265	25.9	4.9e-06
g2500	Pesta-scaffold00004	PF00931.17	NB-ARC	NB-ARC domain	365	626	43.8	1.3e-11
g2500	Pesta-scaffold00004	PF13424.1	TPR_12	Tetratricopeptide repeat	908	986	33.5	2.9e-08
g2500	Pesta-scaffold00004	PF13374.1	TPR_10	Tetratricopeptide repeat	996	1033	17.9	0.0021
g2501	Pesta-scaffold00004	PF07883.6	Cupin_2	Cupin domain	39	105	42.2	4.1e-11
g2503	Pesta-scaffold00004	PF07690.11	MFS_1	Major Facilitator Superfamily	56	430	105.5	2.2e-30
g2504	Pesta-scaffold00004	PF07519.6	Tannase	Tannase and feruloyl esterase	76	545	293.2	3.1e-87
g2506	Pesta-scaffold00004	PF01494.14	FAD_binding_3	FAD binding domain	33	388	260.2	2.6e-77
g2509	Pesta-scaffold00004	PF00107.21	ADH_zinc_N	Zinc-binding dehydrogenase	157	290	89.5	1.2e-25
g2509	Pesta-scaffold00004	PF08240.7	ADH_N	Alcohol dehydrogenase GroES-like domain	34	144	40.2	2.3e-10
g2510	Pesta-scaffold00004	PF04082.13	Fungal_trans	Fungal specific transcription factor domain	156	489	45.5	3.9e-12
g2511	Pesta-scaffold00004	PF07690.11	MFS_1	Major Facilitator Superfamily	65	441	82.4	2.4e-23
g2512	Pesta-scaffold00004	PF00106.20	adh_short	short chain dehydrogenase	4	169	80.8	9.9e-23
g2514	Pesta-scaffold00004	PF09286.6	Pro-kuma_activ	Pro-kumamolisin, activation domain	98	214	80.5	1.1e-22
g2514	Pesta-scaffold00004	PF00082.17	Peptidase_S8	Subtilase family	303	544	27.9	1.2e-06
g2515	Pesta-scaffold00004	PF09797.4	NatB_MDM20	N-acetyltransferase B complex (NatB) non catalytic subunit	325	731	111.5	3.5e-32
g2516	Pesta-scaffold00004	PF10311.4	Ilm1	Increased loss of mitochondrial DNA protein 1	4	173	168.7	7.2e-50
g2517	Pesta-scaffold00004	PF13249.1	Prenyltrans_2	Prenyltransferase-like	74	219	55.5	6.3e-15
g2517	Pesta-scaffold00004	PF00432.16	Prenyltrans	Prenyltransferase and squalene oxidase repeat	343	382	28	1.1e-06
g2518	Pesta-scaffold00004	PF13738.1	Pyr_redox_3	Pyridine nucleotide-disulphide oxidoreductase	62	266	72.1	6.3e-20
g2520	Pesta-scaffold00004	PF07690.11	MFS_1	Major Facilitator Superfamily	40	448	87.8	5.5e-25
g2522	Pesta-scaffold00004	PF00296.15	Bac_luciferase	Luciferase-like monooxygenase	35	417	212.3	8.2e-63
g2524	Pesta-scaffold00004	PF00296.15	Bac_luciferase	Luciferase-like monooxygenase	22	404	203.4	4.3e-60
g2525	Pesta-scaffold00004	PF12584.3	TRAPPC10	Trafficking protein particle complex subunit 10, TRAPPC10	1329	1501	71.4	5.1e-20
g2526	Pesta-scaffold00004	PF07687.9	M20_dimer	Peptidase dimerisation domain	221	329	75.9	1.8e-21
g2526	Pesta-scaffold00004	PF01546.23	Peptidase_M20	Peptidase family M20/M25/M40	111	406	64.1	1.1e-17
g2527	Pesta-scaffold00004	PF01008.12	IF-2B	Initiation factor 2 subunit family	45	366	255.4	4.7e-76
g2530	Pesta-scaffold00004	PF00775.16	Dioxygenase_C	Dioxygenase	123	244	36	3.8e-09
g2534	Pesta-scaffold00004	PF00069.20	Pkinase	Protein kinase domain	39	286	224.5	1.2e-66
g2537	Pesta-scaffold00004	PF04389.12	Peptidase_M28	Peptidase family M28	179	400	132.8	1e-38
g2547	Pesta-scaffold00004	PF00067.17	p450	Cytochrome P450	31	314	205.8	8.5e-61
g2548	Pesta-scaffold00004	PF14441.1	OTT_1508_deam	OTT_1508-like deaminase	255	424	39	6.2e-10
g2549	Pesta-scaffold00004	PF12224.3	Amidoligase_2	Putative amidoligase enzyme	33	373	62.6	4.2e-17
g2552	Pesta-scaffold00004	PF00450.17	Peptidase_S10	Serine carboxypeptidase	53	516	250.8	2.6e-74
g2555	Pesta-scaffold00004	PF04082.13	Fungal_trans	Fungal specific transcription factor domain	648	876	46.2	2.6e-12
g2556	Pesta-scaffold00004	PF01061.19	ABC2_membrane	ABC-2 type transporter	481	691	135.8	1e-39
g2556	Pesta-scaffold00004	PF06422.7	PDR_CDR	CDR ABC transporter	700	803	110.2	3.3e-32
g2556	Pesta-scaffold00004	PF14510.1	ABC_trans_N	ABC-transporter extracellular N-terminal	49	136	72.8	1.7e-20
g2556	Pesta-scaffold00004	PF00005.22	ABC_tran	ABC transporter	155	316	61.7	8.5e-17
g2558	Pesta-scaffold00004	PF00067.17	p450	Cytochrome P450	50	511	197.5	2.8e-58
g2560	Pesta-scaffold00004	PF10067.4	DUF2306	Predicted membrane protein (DUF2306)	113	211	61.1	8.5e-17
g2562	Pesta-scaffold00004	PF04616.9	Glyco_hydro_43	Glycosyl hydrolases family 43	32	320	119.7	1.2e-34
g2564	Pesta-scaffold00004	PF07519.6	Tannase	Tannase and feruloyl esterase	76	543	305.4	6.3e-91
g2564	Pesta-scaffold00004	PF01370.16	Epimerase	NAD dependent epimerase/dehydratase family	575	836	64.4	9.4e-18
g2566	Pesta-scaffold00004	PF00732.14	GMC_oxred_N	GMC oxidoreductase	5	317	189.5	6.8e-56
g2566	Pesta-scaffold00004	PF05199.8	GMC_oxred_C	GMC oxidoreductase	427	567	127.4	4.8e-37
g2569	Pesta-scaffold00004	PF00732.14	GMC_oxred_N	GMC oxidoreductase	11	318	194.1	2.8e-57
g2569	Pesta-scaffold00004	PF05199.8	GMC_oxred_C	GMC oxidoreductase	427	591	107	9.4e-31
g2571	Pesta-scaffold00004	PF08659.5	KR	KR domain	2166	2344	184.8	1.1e-54
g2571	Pesta-scaffold00004	PF00109.21	ketoacyl-synt	Beta-ketoacyl synthase, N-terminal domain	1	198	175	1.9e-51
g2571	Pesta-scaffold00004	PF14765.1	PS-DH	Polyketide synthase dehydratase	939	1250	131.9	2.4e-38
g2571	Pesta-scaffold00004	PF02801.17	Ketoacyl-synt_C	Beta-ketoacyl synthase, C-terminal domain	278	396	125.9	6.6e-37
g2571	Pesta-scaffold00004	PF00698.16	Acyl_transf_1	Acyl transferase domain	595	700	73.4	1.9e-20
g2571	Pesta-scaffold00004	PF00107.21	ADH_zinc_N	Zinc-binding dehydrogenase	1968	2103	68	5.4e-19
g2571	Pesta-scaffold00004	PF08242.7	Methyltransf_12	Methyltransferase domain	1435	1544	57.3	1.6e-15
g2571	Pesta-scaffold00004	PF00550.20	PP-binding	Phosphopantetheine attachment site	2461	2525	33.2	4.4e-08
g2572	Pesta-scaffold00004	PF00106.20	adh_short	short chain dehydrogenase	5	146	54.2	1.5e-14
g2576	Pesta-scaffold00004	PF01063.14	Aminotran_4	Aminotransferase class IV	74	312	113.4	1.1e-32
g2577	Pesta-scaffold00004	PF04082.13	Fungal_trans	Fungal specific transcription factor domain	179	445	80.9	6.4e-23
g2577	Pesta-scaffold00004	PF00172.13	Zn_clus	Fungal Zn(2)-Cys(6) binuclear cluster domain	16	51	30.3	2.8e-07
g2578	Pesta-scaffold00004	PF07690.11	MFS_1	Major Facilitator Superfamily	89	440	98.6	2.9e-28
g2578	Pesta-scaffold00004	PF00106.20	adh_short	short chain dehydrogenase	764	952	47.6	1.6e-12
g2579	Pesta-scaffold00004	PF10528.4	PA14_2	GLEYA domain	120	234	72.6	2.3e-20
g2580	Pesta-scaffold00004	PF11915.3	DUF3433	Protein of unknown function (DUF3433)	459	548	27.4	2.7e-06
g2583	Pesta-scaffold00004	PF02065.13	Melibiase	Melibiase	15	122	40.6	1.2e-10
g2584	Pesta-scaffold00004	PF14269.1	Arylsulfotran_2	Arylsulfotransferase (ASST)	110	396	217.3	2.3e-64
g2586	Pesta-scaffold00004	PF01593.19	Amino_oxidase	Flavin containing amine oxidoreductase	44	475	159.7	1.2e-46
g2587	Pesta-scaffold00004	PF04082.13	Fungal_trans	Fungal specific transcription factor domain	150	406	41.4	7e-11
g2588	Pesta-scaffold00004	PF00463.16	ICL	Isocitrate lyase family	18	520	394.7	4.6e-118
g2589	Pesta-scaffold00004	PF00117.23	GATase	Glutamine amidotransferase class-I	24	244	26.8	2.9e-06
g2590	Pesta-scaffold00004	PF07690.11	MFS_1	Major Facilitator Superfamily	69	438	116.3	1.1e-33
g2592	Pesta-scaffold00004	PF02538.9	Hydantoinase_B	Hydantoinase B/oxoprolinase	752	1296	595.4	6.8e-179
g2592	Pesta-scaffold00004	PF01968.13	Hydantoinase_A	Hydantoinase/oxoprolinase	245	546	291.8	4.4e-87
g2592	Pesta-scaffold00004	PF05378.8	Hydant_A_N	Hydantoinase/oxoprolinase N-terminal region	13	226	176.2	4.1e-52
g2594	Pesta-scaffold00004	PF01636.18	APH	Phosphotransferase enzyme family	50	284	66.5	2.7e-18
g2595	Pesta-scaffold00004	PF12697.2	Abhydrolase_6	Alpha/beta hydrolase family	34	296	97.3	1.1e-27
g2598	Pesta-scaffold00004	PF04193.9	PQ-loop	PQ loop repeat	23	80	28.8	6.5e-07
g2599	Pesta-scaffold00004	PF00881.19	Nitroreductase	Nitroreductase family	15	187	44.7	1.1e-11
g2602	Pesta-scaffold00004	PF00227.21	Proteasome	Proteasome subunit	31	149	108.4	2.4e-31
g2602	Pesta-scaffold00004	PF10584.4	Proteasome_A_N	Proteasome subunit A N-terminal signature	8	30	43.2	1.6e-11
g2604	Pesta-scaffold00004	PF04931.8	DNA_pol_phi	DNA polymerase phi	92	871	158.2	1.9e-46
g2605	Pesta-scaffold00004	PF03443.9	Glyco_hydro_61	Glycosyl hydrolase family 61	10	219	157.9	3e-46
g2605	Pesta-scaffold00004	PF00734.13	CBM_1	Fungal cellulose binding domain	343	369	35.4	5.7e-09
g2607	Pesta-scaffold00004	PF00581.15	Rhodanese	Rhodanese-like domain	355	458	46.9	2.8e-12
g2609	Pesta-scaffold00004	PF00135.23	COesterase	Carboxylesterase family	1	392	206.2	8.4e-61
g2611	Pesta-scaffold00004	PF00651.26	BTB	BTB/POZ domain	110	183	22.1	0.00011
g2612	Pesta-scaffold00004	PF00270.24	DEAD	DEAD/DEAH box helicase	133	324	64.4	8.3e-18
g2612	Pesta-scaffold00004	PF00271.26	Helicase_C	Helicase conserved C-terminal domain	465	540	25.2	1e-05
g2614	Pesta-scaffold00004	PF13832.1	zf-HC5HC2H_2	PHD-zinc-finger like domain	1107	1226	69.8	1.7e-19
g2614	Pesta-scaffold00004	PF01426.13	BAH	BAH domain	260	379	62	3.9e-17
g2614	Pesta-scaffold00004	PF13831.1	PHD_2	PHD-finger	1001	1036	36.8	1.6e-09
g2614	Pesta-scaffold00004	PF00628.24	PHD	PHD-finger	417	467	28	1.2e-06
g2616	Pesta-scaffold00004	PF00383.17	dCMP_cyt_deam_1	Cytidine and deoxycytidylate deaminase zinc-binding region	3	103	81.5	2.7e-23
g2621	Pesta-scaffold00004	PF07818.8	HCNGP	HCNGP-like protein	121	219	96.5	6.6e-28
g2623	Pesta-scaffold00004	PF00004.24	AAA	ATPase family associated with various cellular activities (AAA)	172	305	145.6	8.8e-43
g2624	Pesta-scaffold00004	PF01380.17	SIS	SIS domain	381	510	102.8	9.9e-30
g2624	Pesta-scaffold00004	PF13522.1	GATase_6	Glutamine amidotransferase domain	68	209	69.6	2.4e-19
g2625	Pesta-scaffold00004	PF00227.21	Proteasome	Proteasome subunit	37	229	102.5	1.6e-29
g2628	Pesta-scaffold00004	PF08580.5	KAR9	Yeast cortical protein KAR9	302	1010	465.2	3.3e-139
g2630	Pesta-scaffold00004	PF06912.6	DUF1275	Protein of unknown function (DUF1275)	56	266	149.8	5.4e-44
g2630	Pesta-scaffold00004	PF00270.24	DEAD	DEAD/DEAH box helicase	1222	1399	71.2	6.5e-20
g2630	Pesta-scaffold00004	PF00271.26	Helicase_C	Helicase conserved C-terminal domain	1464	1542	55	5.2e-15
g2630	Pesta-scaffold00004	PF09382.5	RQC	RQC domain	1628	1739	47.9	8.8e-13
g2632	Pesta-scaffold00004	PF07690.11	MFS_1	Major Facilitator Superfamily	38	493	81	6.5e-23
g2635	Pesta-scaffold00004	PF10342.4	GPI-anchored	Ser-Thr-rich glycosyl-phosphatidyl-inositol-anchored membrane family	27	120	74.3	8.1e-21
g2637	Pesta-scaffold00004	PF00013.24	KH_1	KH domain	417	479	59.8	1.4e-16
g2637	Pesta-scaffold00004	PF13014.1	KH_3	KH domain	220	262	35	7.7e-09
g2639	Pesta-scaffold00004	PF08543.7	Phos_pyr_kin	Phosphomethylpyrimidine kinase	88	266	38.5	6.8e-10
g2640	Pesta-scaffold00004	PF00692.14	dUTPase	dUTPase	69	198	145.4	5.6e-43
g2643	Pesta-scaffold00004	PF02747.10	PCNA_C	Proliferating cell nuclear antigen, C-terminal domain	127	254	176.5	1.8e-52
g2643	Pesta-scaffold00004	PF00705.13	PCNA_N	Proliferating cell nuclear antigen, N-terminal domain	1	125	172.7	2.1e-51
g2644	Pesta-scaffold00004	PF12632.2	Vezatin	Mysoin-binding motif of peroxisomes	211	502	63.1	1.9e-17
g2646	Pesta-scaffold00004	PF07019.7	Rab5ip	Rab5-interacting protein (Rab5ip)	17	113	75.1	3.4e-21
g2647	Pesta-scaffold00004	PF00009.22	GTP_EFTU	Elongation factor Tu GTP binding domain	283	547	30.1	2.9e-07
g2650	Pesta-scaffold00004	PF05347.10	Complex1_LYR	Complex 1 protein (LYR family)	28	85	30.5	2.2e-07
g2652	Pesta-scaffold00004	PF07717.11	OB_NTP_bind	Oligonucleotide/oligosaccharide-binding (OB)-fold	596	775	65.9	2.5e-18
g2652	Pesta-scaffold00004	PF04408.18	HA2	Helicase associated domain (HA2)	534	629	58.8	4.1e-16
g2652	Pesta-scaffold00004	PF00271.26	Helicase_C	Helicase conserved C-terminal domain	379	474	48.4	6.3e-13
g2652	Pesta-scaffold00004	PF00270.24	DEAD	DEAD/DEAH box helicase	106	294	29.1	6e-07
g2656	Pesta-scaffold00004	PF13738.1	Pyr_redox_3	Pyridine nucleotide-disulphide oxidoreductase	46	250	70	2.6e-19
g2659	Pesta-scaffold00004	PF10342.4	GPI-anchored	Ser-Thr-rich glycosyl-phosphatidyl-inositol-anchored membrane family	24	108	52.2	6.1e-14
g2664	Pesta-scaffold00004	PF07228.7	SpoIIE	Stage II sporulation protein E (SpoIIE)	125	336	34.6	1.4e-08
g2667	Pesta-scaffold00004	PF13085.1	Fer2_3	2Fe-2S iron-sulfur cluster binding domain	53	159	113.2	4.9e-33
g2667	Pesta-scaffold00004	PF13534.1	Fer4_17	4Fe-4S dicluster domain	195	268	37	3.1e-09
g2671	Pesta-scaffold00004	PF01302.20	CAP_GLY	CAP-Gly domain	7	80	65.6	2.3e-18
g2671	Pesta-scaffold00004	PF00560.28	LRR_1	Leucine Rich Repeat	315	345	10.2	0.65
g2673	Pesta-scaffold00004	PF01575.14	MaoC_dehydratas	MaoC like domain	169	288	78.7	2.2e-22
g2675	Pesta-scaffold00004	PF01070.13	FMN_dh	FMN-dependent dehydrogenase	120	470	343.7	9.3e-103
g2675	Pesta-scaffold00004	PF00173.23	Cyt-b5	Cytochrome b5-like Heme/Steroid binding domain	6	81	74.7	3.6e-21
g2677	Pesta-scaffold00004	PF12505.3	DUF3712	Protein of unknown function (DUF3712)	107	228	73.7	1.2e-20
g2681	Pesta-scaffold00005	PF14629.1	ORC4_C	Origin recognition complex (ORC) subunit 4 C-terminus	607	827	205.2	6.7e-61
g2681	Pesta-scaffold00005	PF13191.1	AAA_16	AAA ATPase domain	408	570	55.9	4.9e-15
g2681	Pesta-scaffold00005	PF00628.24	PHD	PHD-finger	312	360	37.1	1.8e-09
g2682	Pesta-scaffold00005	PF00069.20	Pkinase	Protein kinase domain	841	1100	211.6	1e-62
g2682	Pesta-scaffold00005	PF02185.11	HR1	Hr1 repeat	174	242	59.6	1.8e-16
g2682	Pesta-scaffold00005	PF00433.19	Pkinase_C	Protein kinase C terminal domain	1120	1165	52.2	6.3e-14
g2682	Pesta-scaffold00005	PF00130.17	C1_1	Phorbol esters/diacylglycerol binding domain (C1 domain)	481	531	43	2.6e-11
g2685	Pesta-scaffold00005	PF05546.6	She9_MDM33	She9 / Mdm33 family	161	366	272.9	1.5e-81
g2687	Pesta-scaffold00005	PF12710.2	HAD	haloacid dehalogenase-like hydrolase	20	203	48.8	9e-13
g2689	Pesta-scaffold00005	PF05179.9	CDC73	RNA pol II accessory factor, Cdc73 family	162	403	161	3.4e-47
g2690	Pesta-scaffold00005	PF04177.7	TAP42	TAP42-like family	7	351	334.4	6.2e-100
g2691	Pesta-scaffold00005	PF00636.21	Ribonuclease_3	Ribonuclease III domain	1294	1420	77.4	1e-21
g2691	Pesta-scaffold00005	PF03368.9	Dicer_dimer	Dicer dimerisation domain	645	735	67.9	4.8e-19
g2691	Pesta-scaffold00005	PF00271.26	Helicase_C	Helicase conserved C-terminal domain	484	570	58.5	4.3e-16
g2691	Pesta-scaffold00005	PF04851.10	ResIII	Type III restriction enzyme, res subunit	107	287	47.4	1.9e-12
g2691	Pesta-scaffold00005	PF14622.1	Ribonucleas_3_3	Ribonuclease-III-like	1064	1214	35.5	8.1e-09
g2695	Pesta-scaffold00005	PF01088.16	Peptidase_C12	Ubiquitin carboxyl-terminal hydrolase, family 1	18	232	210.9	1.1e-62
g2697	Pesta-scaffold00005	PF12697.2	Abhydrolase_6	Alpha/beta hydrolase family	142	489	92.1	4.5e-26
g2698	Pesta-scaffold00005	PF07717.11	OB_NTP_bind	Oligonucleotide/oligosaccharide-binding (OB)-fold	970	1141	93.9	5e-27
g2698	Pesta-scaffold00005	PF04408.18	HA2	Helicase associated domain (HA2)	917	1007	92	1.8e-26
g2698	Pesta-scaffold00005	PF00271.26	Helicase_C	Helicase conserved C-terminal domain	762	856	46.6	2.2e-12
g2698	Pesta-scaffold00005	PF00575.18	S1	S1 RNA binding domain	219	293	43	3.4e-11
g2698	Pesta-scaffold00005	PF00270.24	DEAD	DEAD/DEAH box helicase	529	687	30	3.2e-07
g2701	Pesta-scaffold00005	PF01679.12	Pmp3	Proteolipid membrane potential modulator	4	55	67.2	7e-19
g2705	Pesta-scaffold00005	PF12513.3	SUV3_C	Mitochondrial degradasome RNA helicase subunit C terminal	645	693	53.8	8.7e-15
g2705	Pesta-scaffold00005	PF00271.26	Helicase_C	Helicase conserved C-terminal domain	383	469	32.9	4.1e-08
g2709	Pesta-scaffold00005	PF00957.16	Synaptobrevin	Synaptobrevin	145	233	111.5	1e-32
g2709	Pesta-scaffold00005	PF13774.1	Longin	Regulated-SNARE-like domain	37	130	71.3	3.4e-20
g2710	Pesta-scaffold00005	PF00106.20	adh_short	short chain dehydrogenase	55	241	44.6	1.4e-11
g2711	Pesta-scaffold00005	PF01585.18	G-patch	G-patch domain	351	397	35.5	6.1e-09
g2712	Pesta-scaffold00005	PF00995.18	Sec1	Sec1 family	25	599	454.2	6.3e-136
g2714	Pesta-scaffold00005	PF00782.15	DSPc	Dual specificity phosphatase, catalytic domain	99	267	50.2	1.8e-13
g2716	Pesta-scaffold00005	PF03907.8	Spo7	Spo7-like protein	45	277	234.8	7e-70
g2718	Pesta-scaffold00005	PF07690.11	MFS_1	Major Facilitator Superfamily	52	452	142.4	1.3e-41
g2721	Pesta-scaffold00005	PF00320.22	GATA	GATA zinc finger	23	57	53.5	1e-14
g2725	Pesta-scaffold00005	PF04063.9	DUF383	Domain of unknown function (DUF383)	599	787	215.2	5.5e-64
g2725	Pesta-scaffold00005	PF04064.8	DUF384	Domain of unknown function (DUF384)	791	847	75.4	1.8e-21
g2726	Pesta-scaffold00005	PF05291.6	Bystin	Bystin	142	475	403.9	3.1e-121
g2727	Pesta-scaffold00005	PF04248.7	DUF427	Domain of unknown function (DUF427)	6	95	91.6	1.7e-26
g2728	Pesta-scaffold00005	PF00083.19	Sugar_tr	Sugar (and other) transporter	58	548	163	8.5e-48
g2729	Pesta-scaffold00005	PF01070.13	FMN_dh	FMN-dependent dehydrogenase	118	460	404.5	3.1e-121
g2729	Pesta-scaffold00005	PF00173.23	Cyt-b5	Cytochrome b5-like Heme/Steroid binding domain	3	77	79.2	1.4e-22
g2731	Pesta-scaffold00005	PF00888.17	Cullin	Cullin family	21	669	667.8	1.3e-200
g2731	Pesta-scaffold00005	PF10557.4	Cullin_Nedd8	Cullin protein neddylation domain	696	762	93.9	3.6e-27
g2737	Pesta-scaffold00005	PF00953.16	Glycos_transf_4	Glycosyl transferase family 4	151	328	100.7	6.6e-29
g2739	Pesta-scaffold00005	PF00628.24	PHD	PHD-finger	48	98	30.8	1.7e-07
g2739	Pesta-scaffold00005	PF00856.23	SET	SET domain	345	408	29	1.1e-06
g2741	Pesta-scaffold00005	PF04768.8	DUF619	Protein of unknown function (DUF619)	460	658	169.6	3.8e-50
g2742	Pesta-scaffold00005	PF10712.4	NAD-GH	NAD-specific glutamate dehydrogenase	293	833	107.1	7.1e-31
g2743	Pesta-scaffold00005	PF00012.15	HSP70	Hsp70 protein	3	650	572.3	7.5e-172
g2745	Pesta-scaffold00005	PF00400.27	WD40	WD domain, G-beta repeat	315	354	22.5	7.2e-05
g2747	Pesta-scaffold00005	PF01341.12	Glyco_hydro_6	Glycosyl hydrolases family 6	45	367	296.4	2.4e-88
g2748	Pesta-scaffold00005	PF00106.20	adh_short	short chain dehydrogenase	35	205	92.8	2.1e-26
g2749	Pesta-scaffold00005	PF08240.7	ADH_N	Alcohol dehydrogenase GroES-like domain	27	141	105	1.6e-30
g2749	Pesta-scaffold00005	PF00107.21	ADH_zinc_N	Zinc-binding dehydrogenase	181	318	68.9	2.8e-19
g2751	Pesta-scaffold00005	PF13561.1	adh_short_C2	Enoyl-(Acyl carrier protein) reductase	46	294	97.3	1.1e-27
g2752	Pesta-scaffold00005	PF00083.19	Sugar_tr	Sugar (and other) transporter	26	485	339.9	1.8e-101
g2754	Pesta-scaffold00005	PF04082.13	Fungal_trans	Fungal specific transcription factor domain	221	462	101.8	2.8e-29
g2754	Pesta-scaffold00005	PF00172.13	Zn_clus	Fungal Zn(2)-Cys(6) binuclear cluster domain	16	55	22.7	6.4e-05
g2757	Pesta-scaffold00005	PF00248.16	Aldo_ket_red	Aldo/keto reductase family	3	297	176.9	3.6e-52
g2758	Pesta-scaffold00005	PF05916.6	Sld5	GINS complex protein	50	201	85.5	2.6e-24
g2761	Pesta-scaffold00005	PF00176.18	SNF2_N	SNF2 family N-terminal domain	148	459	226.8	2.5e-67
g2761	Pesta-scaffold00005	PF00271.26	Helicase_C	Helicase conserved C-terminal domain	690	767	57.2	1.1e-15
g2761	Pesta-scaffold00005	PF02178.14	AT_hook	AT hook motif	477	489	10.7	0.33
g2762	Pesta-scaffold00005	PF02268.11	TFIIA_gamma_N	Transcription initiation factor IIA, gamma subunit, helical domain	6	54	90.8	2.8e-26
g2762	Pesta-scaffold00005	PF02751.9	TFIIA_gamma_C	Transcription initiation factor IIA, gamma subunit	56	107	87.6	3.3e-25
g2765	Pesta-scaffold00005	PF00654.15	Voltage_CLC	Voltage gated chloride channel	183	566	297.6	1.1e-88
g2765	Pesta-scaffold00005	PF00571.23	CBS	CBS domain	706	760	25.4	8.4e-06
g2766	Pesta-scaffold00005	PF00808.18	CBFD_NFYB_HMF	Histone-like transcription factor (CBF/NF-Y) and archaeal histone	18	84	48.3	7.4e-13
g2767	Pesta-scaffold00005	PF14580.1	LRR_9	Leucine-rich repeat	1	174	149.4	7e-44
g2769	Pesta-scaffold00005	PF00117.23	GATase	Glutamine amidotransferase class-I	71	235	30.5	2.1e-07
g2771	Pesta-scaffold00005	PF00397.21	WW	WW domain	292	322	30.1	3.1e-07
g2773	Pesta-scaffold00005	PF10282.4	Lactonase	Lactonase, 7-bladed beta-propeller	83	454	278.1	9.2e-83
g2776	Pesta-scaffold00005	PF00172.13	Zn_clus	Fungal Zn(2)-Cys(6) binuclear cluster domain	144	181	36.2	4.1e-09
g2776	Pesta-scaffold00005	PF04082.13	Fungal_trans	Fungal specific transcription factor domain	320	556	30.6	1.5e-07
g2779	Pesta-scaffold00005	PF00067.17	p450	Cytochrome P450	80	531	188.8	1.2e-55
g2781	Pesta-scaffold00005	PF01042.16	Ribonuc_L-PSP	Endoribonuclease L-PSP	8	125	88.3	2.9e-25
g2784	Pesta-scaffold00005	PF04802.10	SMK-1	Component of IIS longevity pathway SMK-1	266	458	254.5	4.9e-76
g2788	Pesta-scaffold00005	PF00107.21	ADH_zinc_N	Zinc-binding dehydrogenase	185	314	72.1	2.9e-20
g2790	Pesta-scaffold00005	PF04143.9	Sulf_transp	Sulphur transport	280	323	41.5	9.7e-11
g2796	Pesta-scaffold00005	PF00775.16	Dioxygenase_C	Dioxygenase	121	240	35.1	7.2e-09
g2797	Pesta-scaffold00005	PF00664.18	ABC_membrane	ABC transporter transmembrane region	43	320	134.5	4.4e-39
g2797	Pesta-scaffold00005	PF00005.22	ABC_tran	ABC transporter	381	555	91	7.4e-26
g2799	Pesta-scaffold00005	PF00005.22	ABC_tran	ABC transporter	76	231	96.6	1.4e-27
g2801	Pesta-scaffold00005	PF00172.13	Zn_clus	Fungal Zn(2)-Cys(6) binuclear cluster domain	21	60	33.8	2.3e-08
g2804	Pesta-scaffold00005	PF00303.14	Thymidylat_synt	Thymidylate synthase	33	343	387.8	1.9e-116
g2806	Pesta-scaffold00005	PF03221.11	HTH_Tnp_Tc5	Tc5 transposase DNA-binding domain	199	266	58.1	5.3e-16
g2808	Pesta-scaffold00005	PF00787.19	PX	PX domain	339	447	50.5	1.4e-13
g2808	Pesta-scaffold00005	PF00018.23	SH3_1	SH3 domain	60	109	49.5	1.9e-13
g2808	Pesta-scaffold00005	PF00564.19	PB1	PB1 domain	519	596	33.7	2e-08
g2809	Pesta-scaffold00005	PF03399.11	SAC3_GANP	SAC3/GANP/Nin1/mts3/eIF-3 p25 family	312	509	225.1	6.1e-67
g2810	Pesta-scaffold00005	PF04157.11	EAP30	EAP30/Vps36 family	367	608	193.3	3e-57
g2810	Pesta-scaffold00005	PF11605.3	Vps36_ESCRT-II	Vacuolar protein sorting protein 36 Vps36	7	95	97.9	2.1e-28
g2815	Pesta-scaffold00005	PF00326.16	Peptidase_S9	Prolyl oligopeptidase family	489	704	146.9	4.5e-43
g2817	Pesta-scaffold00005	PF00450.17	Peptidase_S10	Serine carboxypeptidase	446	863	253.2	4.8e-75
g2817	Pesta-scaffold00005	PF12695.2	Abhydrolase_5	Alpha/beta hydrolase family	127	335	45.9	4.4e-12
g2819	Pesta-scaffold00005	PF01636.18	APH	Phosphotransferase enzyme family	149	346	25.3	1e-05
g2821	Pesta-scaffold00005	PF13091.1	PLDc_2	PLD-like domain	518	668	40.7	1.7e-10
g2822	Pesta-scaffold00005	PF04389.12	Peptidase_M28	Peptidase family M28	179	368	83.3	1.6e-23
g2824	Pesta-scaffold00005	PF07690.11	MFS_1	Major Facilitator Superfamily	83	454	99.3	1.7e-28
g2825	Pesta-scaffold00005	PF00109.21	ketoacyl-synt	Beta-ketoacyl synthase, N-terminal domain	1	252	232.8	4.1e-69
g2825	Pesta-scaffold00005	PF08659.5	KR	KR domain	2225	2403	187.9	1.3e-55
g2825	Pesta-scaffold00005	PF00698.16	Acyl_transf_1	Acyl transferase domain	610	945	187.7	3.1e-55
g2825	Pesta-scaffold00005	PF14765.1	PS-DH	Polyketide synthase dehydratase	995	1306	142.1	2e-41
g2825	Pesta-scaffold00005	PF02801.17	Ketoacyl-synt_C	Beta-ketoacyl synthase, C-terminal domain	260	378	117.5	2.8e-34
g2825	Pesta-scaffold00005	PF00107.21	ADH_zinc_N	Zinc-binding dehydrogenase	2024	2162	64.4	6.7e-18
g2825	Pesta-scaffold00005	PF13489.1	Methyltransf_23	Methyltransferase domain	1460	1651	47.4	1.6e-12
g2825	Pesta-scaffold00005	PF00550.20	PP-binding	Phosphopantetheine attachment site	2520	2586	33.8	2.9e-08
g2825	Pesta-scaffold00005	PF08240.7	ADH_N	Alcohol dehydrogenase GroES-like domain	1906	2016	21.7	0.00013
g2827	Pesta-scaffold00005	PF00155.16	Aminotran_1_2	Aminotransferase class I and II	65	443	125	3.2e-36
g2829	Pesta-scaffold00005	PF00583.19	Acetyltransf_1	Acetyltransferase (GNAT) family	75	188	35.2	9.1e-09
g2831	Pesta-scaffold00005	PF07519.6	Tannase	Tannase and feruloyl esterase	231	703	314	1.6e-93
g2834	Pesta-scaffold00005	PF07519.6	Tannase	Tannase and feruloyl esterase	61	519	289.7	3.7e-86
g2835	Pesta-scaffold00005	PF02724.9	CDC45	CDC45-like protein	25	295	201.3	1.8e-59
g2837	Pesta-scaffold00005	PF02724.9	CDC45	CDC45-like protein	1	420	464.5	3.8e-139
g2839	Pesta-scaffold00005	PF13499.1	EF-hand_7	EF-hand domain pair	121	199	49	4.6e-13
g2839	Pesta-scaffold00005	PF13833.1	EF-hand_8	EF-hand domain pair	66	119	22	8.6e-05
g2840	Pesta-scaffold00005	PF00501.23	AMP-binding	AMP-binding enzyme	103	571	279.5	3e-83
g2841	Pesta-scaffold00005	PF10294.4	Methyltransf_16	Putative methyltransferase	54	226	45.9	4e-12
g2842	Pesta-scaffold00005	PF04082.13	Fungal_trans	Fungal specific transcription factor domain	253	469	61.9	3.9e-17
g2842	Pesta-scaffold00005	PF00172.13	Zn_clus	Fungal Zn(2)-Cys(6) binuclear cluster domain	67	105	37.2	1.9e-09
g2844	Pesta-scaffold00005	PF00646.28	F-box	F-box domain	13	60	22.6	5.5e-05
g2847	Pesta-scaffold00005	PF01841.14	Transglut_core	Transglutaminase-like superfamily	338	456	43.8	2.4e-11
g2851	Pesta-scaffold00005	PF00704.23	Glyco_hydro_18	Glycosyl hydrolases family 18	283	642	262.7	5.9e-78
g2853	Pesta-scaffold00005	PF01851.17	PC_rep	Proteasome/cyclosome repeat	492	526	27.4	2.4e-06
g2855	Pesta-scaffold00005	PF01163.17	RIO1	RIO1 family	182	320	97.3	6.7e-28
g2855	Pesta-scaffold00005	PF09202.6	Rio2_N	Rio2, N-terminal	81	165	96.1	9.3e-28
g2857	Pesta-scaffold00005	PF00076.17	RRM_1	RNA recognition motif. (a.k.a. RRM, RBD, or RNP domain)	285	350	43.5	1.7e-11
g2857	Pesta-scaffold00005	PF14259.1	RRM_6	RNA recognition motif (a.k.a. RRM, RBD, or RNP domain)	444	508	22.8	6.2e-05
g2859	Pesta-scaffold00005	PF00667.15	FAD_binding_1	FAD binding domain	268	488	208.5	7.8e-62
g2859	Pesta-scaffold00005	PF00258.20	Flavodoxin_1	Flavodoxin	67	212	116.7	7.7e-34
g2859	Pesta-scaffold00005	PF00175.16	NAD_binding_1	Oxidoreductase NAD-binding domain	544	656	70.3	1.7e-19
g2861	Pesta-scaffold00005	PF14222.1	MOR2-PAG1_N	Cell morphogenesis N-terminal	375	963	691	1.1e-207
g2861	Pesta-scaffold00005	PF14225.1	MOR2-PAG1_C	Cell morphogenesis C-terminal	1999	2261	282.2	4.5e-84
g2861	Pesta-scaffold00005	PF14228.1	MOR2-PAG1_mid	Cell morphogenesis central region	1475	1754	61.5	3e-17
g2865	Pesta-scaffold00005	PF02966.11	DIM1	Mitosis protein DIM1	249	381	225.2	1.4e-67
g2866	Pesta-scaffold00005	PF11707.3	Npa1	Ribosome 60S biogenesis N-terminal	103	453	267.6	1.3e-79
g2870	Pesta-scaffold00005	PF04388.7	Hamartin	Hamartin protein	168	880	116.2	1.8e-33
g2872	Pesta-scaffold00005	PF13278.1	DUF4066	Putative amidotransferase	19	180	59.3	2.6e-16
g2874	Pesta-scaffold00005	PF00276.15	Ribosomal_L23	Ribosomal protein L23	6	108	42.7	3.9e-11
g2877	Pesta-scaffold00005	PF00106.20	adh_short	short chain dehydrogenase	4	166	107.8	5e-31
g2879	Pesta-scaffold00005	PF05063.9	MT-A70	MT-A70	164	336	99.3	1.7e-28
g2880	Pesta-scaffold00005	PF02714.10	DUF221	Domain of unknown function DUF221	662	989	335.4	2.5e-100
g2880	Pesta-scaffold00005	PF13967.1	RSN1_TM	Late exocytosis, associated with Golgi transport	24	190	137.2	3.2e-40
g2880	Pesta-scaffold00005	PF12621.3	DUF3779	Phosphate metabolism protein	1145	1244	61.9	3.9e-17
g2880	Pesta-scaffold00005	PF14703.1	DUF4463	Domain of unknown function (DUF4463)	247	324	23	8.3e-05
g2884	Pesta-scaffold00005	PF07690.11	MFS_1	Major Facilitator Superfamily	215	608	116.1	1.3e-33
g2886	Pesta-scaffold00005	PF02990.11	EMP70	Endomembrane protein 70	55	674	545.7	9.1e-164
g2889	Pesta-scaffold00005	PF00153.22	Mito_carr	Mitochondrial carrier protein	71	169	71.1	4.4e-20
g2891	Pesta-scaffold00005	PF13532.1	2OG-FeII_Oxy_2	2OG-Fe(II) oxygenase superfamily	130	360	106.9	1.1e-30
g2891	Pesta-scaffold00005	PF06839.7	zf-GRF	GRF zinc finger	372	419	38.1	1e-09
g2891	Pesta-scaffold00005	PF02845.11	CUE	CUE domain	27	67	25	9.3e-06
g2893	Pesta-scaffold00005	PF00400.27	WD40	WD domain, G-beta repeat	249	287	32.2	6.3e-08
g2900	Pesta-scaffold00005	PF04082.13	Fungal_trans	Fungal specific transcription factor domain	282	584	101.2	4.2e-29
g2900	Pesta-scaffold00005	PF00172.13	Zn_clus	Fungal Zn(2)-Cys(6) binuclear cluster domain	70	109	30.9	1.8e-07
g2903	Pesta-scaffold00005	PF07690.11	MFS_1	Major Facilitator Superfamily	18	350	109.7	1.2e-31
g2905	Pesta-scaffold00005	PF02133.10	Transp_cyt_pur	Permease for cytosine/purines, uracil, thiamine, allantoin	68	492	99	2.1e-28
g2907	Pesta-scaffold00005	PF01872.12	RibD_C	RibD C-terminal domain	34	261	118.4	3e-34
g2909	Pesta-scaffold00005	PF04209.8	HgmA	homogentisate 1,2-dioxygenase	32	449	441.3	2.4e-132
g2912	Pesta-scaffold00005	PF01494.14	FAD_binding_3	FAD binding domain	6	382	80.9	8.3e-23
g2913	Pesta-scaffold00005	PF00179.21	UQ_con	Ubiquitin-conjugating enzyme	16	94	38.9	4.9e-10
g2914	Pesta-scaffold00005	PF00294.19	PfkB	pfkB family carbohydrate kinase	2	318	181.3	2.2e-53
g2916	Pesta-scaffold00005	PF06244.7	DUF1014	Protein of unknown function (DUF1014)	7	192	79.9	1.6e-22
g2918	Pesta-scaffold00005	PF04828.9	GFA	Glutathione-dependent formaldehyde-activating enzyme	34	126	25.3	1e-05
g2919	Pesta-scaffold00005	PF11831.3	Myb_Cef	pre-mRNA splicing factor component	422	631	163.6	4e-48
g2919	Pesta-scaffold00005	PF13921.1	Myb_DNA-bind_6	Myb-like DNA-binding domain	9	69	54	1.2e-14
g2922	Pesta-scaffold00005	PF07690.11	MFS_1	Major Facilitator Superfamily	151	537	109.4	1.4e-31
g2924	Pesta-scaffold00005	PF00349.16	Hexokinase_1	Hexokinase	1	231	92.7	1.8e-26
g2924	Pesta-scaffold00005	PF03727.11	Hexokinase_2	Hexokinase	238	435	65.2	4.9e-18
g2925	Pesta-scaffold00005	PF03227.11	GILT	Gamma interferon inducible lysosomal thiol reductase (GILT)	85	192	56.2	2.6e-15
g2926	Pesta-scaffold00005	PF11969.3	DcpS_C	Scavenger mRNA decapping enzyme C-term binding	149	272	103.3	8.7e-30
g2926	Pesta-scaffold00005	PF05652.7	DcpS	Scavenger mRNA decapping enzyme (DcpS) N-terminal	11	119	82.6	2.4e-23
g2927	Pesta-scaffold00005	PF12697.2	Abhydrolase_6	Alpha/beta hydrolase family	1	223	67.9	1.1e-18
g2928	Pesta-scaffold00005	PF04616.9	Glyco_hydro_43	Glycosyl hydrolases family 43	4	295	347.6	4.3e-104
g2932	Pesta-scaffold00005	PF01398.16	JAB	JAB1/Mov34/MPN/PAD-1 ubiquitin protease	13	122	32	7.7e-08
g2934	Pesta-scaffold00005	PF08240.7	ADH_N	Alcohol dehydrogenase GroES-like domain	47	162	92.1	1.7e-26
g2934	Pesta-scaffold00005	PF00107.21	ADH_zinc_N	Zinc-binding dehydrogenase	277	384	45.1	6.3e-12
g2936	Pesta-scaffold00005	PF09325.5	Vps5	Vps5 C terminal like	312	506	56.7	1.9e-15
g2936	Pesta-scaffold00005	PF00787.19	PX	PX domain	152	262	33.5	2.7e-08
g2937	Pesta-scaffold00005	PF00009.22	GTP_EFTU	Elongation factor Tu GTP binding domain	48	334	170.1	3.4e-50
g2937	Pesta-scaffold00005	PF14492.1	EFG_II	Elongation Factor G, domain II	477	551	64.6	5.4e-18
g2937	Pesta-scaffold00005	PF00679.19	EFG_C	Elongation factor G C-terminus	694	819	49.6	2.6e-13
g2937	Pesta-scaffold00005	PF03144.20	GTP_EFTU_D2	Elongation factor Tu domain 2	388	455	26.7	4.2e-06
g2940	Pesta-scaffold00005	PF11951.3	Fungal_trans_2	Fungal specific transcription factor domain	135	324	33.6	1.5e-08
g2943	Pesta-scaffold00005	PF02921.9	UCR_TM	Ubiquinol cytochrome reductase transmembrane region	47	102	64.4	7.8e-18
g2943	Pesta-scaffold00005	PF00355.21	Rieske	Rieske [2Fe-2S] domain	131	223	63.4	1e-17
g2948	Pesta-scaffold00005	PF13499.1	EF-hand_7	EF-hand domain pair	85	146	59.4	2.6e-16
g2948	Pesta-scaffold00005	PF13833.1	EF-hand_8	EF-hand domain pair	24	76	44.6	7.6e-12
g2950	Pesta-scaffold00005	PF08622.5	Svf1	Svf1-like	76	401	414.5	2.4e-124
g2953	Pesta-scaffold00005	PF03946.9	Ribosomal_L11_N	Ribosomal protein L11, N-terminal domain	13	72	86.8	4.5e-25
g2953	Pesta-scaffold00005	PF00298.14	Ribosomal_L11	Ribosomal protein L11, RNA binding domain	77	154	84.4	4.3e-24
g2954	Pesta-scaffold00005	PF00125.19	Histone	Core histone H2A/H2B/H3/H4	6	64	29.7	5e-07
g2962	Pesta-scaffold00005	PF08385.7	DHC_N1	Dynein heavy chain, N-terminal region 1	290	876	608.2	1.3e-182
g2962	Pesta-scaffold00005	PF08393.8	DHC_N2	Dynein heavy chain, N-terminal region 2	1381	1792	392.4	1.7e-117
g2962	Pesta-scaffold00005	PF03028.10	Dynein_heavy	Dynein heavy chain and region D6 of dynein motor	3948	4389	356.5	2.3e-106
g2962	Pesta-scaffold00005	PF12774.2	AAA_6	Hydrolytic ATP binding site of dynein motor region D1	1929	2159	244.6	8.6e-73
g2962	Pesta-scaffold00005	PF12781.2	AAA_9	ATP-binding dynein motor region D5	3592	3820	138.3	1.6e-40
g2962	Pesta-scaffold00005	PF12777.2	MT	Microtubule-binding stalk of dynein motor	3235	3575	135.6	1.6e-39
g2962	Pesta-scaffold00005	PF12780.2	AAA_8	P-loop containing dynein motor region D4	2936	3223	130.9	4e-38
g2962	Pesta-scaffold00005	PF12775.2	AAA_7	P-loop containing dynein motor region D3	2592	2864	66	2.7e-18
g2962	Pesta-scaffold00005	PF07728.9	AAA_5	AAA domain (dynein-related subfamily)	2254	2394	45.6	5.2e-12
g2965	Pesta-scaffold00005	PF01040.13	UbiA	UbiA prenyltransferase family	23	291	84.3	7.4e-24
g2967	Pesta-scaffold00005	PF00732.14	GMC_oxred_N	GMC oxidoreductase	6	283	195.3	1.2e-57
g2967	Pesta-scaffold00005	PF05199.8	GMC_oxred_C	GMC oxidoreductase	425	564	108.8	2.7e-31
g2968	Pesta-scaffold00005	PF00350.18	Dynamin_N	Dynamin family	41	224	92.1	3.1e-26
g2968	Pesta-scaffold00005	PF01031.15	Dynamin_M	Dynamin central region	242	375	49.4	2.5e-13
g2970	Pesta-scaffold00005	PF00881.19	Nitroreductase	Nitroreductase family	30	186	90.4	1e-25
g2974	Pesta-scaffold00005	PF09286.6	Pro-kuma_activ	Pro-kumamolisin, activation domain	38	180	145.2	1.2e-42
g2974	Pesta-scaffold00005	PF00082.17	Peptidase_S8	Subtilase family	393	603	40.4	1.8e-10
g2975	Pesta-scaffold00005	PF00270.24	DEAD	DEAD/DEAH box helicase	178	380	138.3	1.6e-40
g2975	Pesta-scaffold00005	PF00271.26	Helicase_C	Helicase conserved C-terminal domain	493	569	65.1	3.6e-18
g2975	Pesta-scaffold00005	PF13959.1	DUF4217	Domain of unknown function (DUF4217)	640	705	51.2	6.5e-14
g2977	Pesta-scaffold00005	PF12739.2	TRAPPC-Trs85	ER-Golgi trafficking TRAPP I complex 85 kDa subunit	293	700	390.1	9.5e-117
g2979	Pesta-scaffold00005	PF00199.14	Catalase	Catalase	35	327	197.5	2.6e-58
g2981	Pesta-scaffold00005	PF00106.20	adh_short	short chain dehydrogenase	8	110	44.3	1.6e-11
g2984	Pesta-scaffold00005	PF13714.1	PEP_mutase	Phosphoenolpyruvate phosphomutase	185	435	149.5	8.4e-44
g2985	Pesta-scaffold00005	PF07690.11	MFS_1	Major Facilitator Superfamily	52	468	182.8	6.9e-54
g2986	Pesta-scaffold00005	PF06912.6	DUF1275	Protein of unknown function (DUF1275)	44	265	136.4	7e-40
g2987	Pesta-scaffold00005	PF12352.3	V-SNARE_C	Snare region anchored in the vesicle membrane C-terminus	195	260	53.3	2.1e-14
g2989	Pesta-scaffold00005	PF04265.9	TPK_B1_binding	Thiamin pyrophosphokinase, vitamin B1 binding domain	185	264	73.3	9e-21
g2989	Pesta-scaffold00005	PF04263.11	TPK_catalytic	Thiamin pyrophosphokinase, catalytic domain	28	173	67.3	8.2e-19
g2990	Pesta-scaffold00005	PF00083.19	Sugar_tr	Sugar (and other) transporter	86	540	276.7	2.6e-82
g2991	Pesta-scaffold00005	PF06747.8	CHCH	CHCH domain	175	210	27	2.9e-06
g2993	Pesta-scaffold00005	PF00128.19	Alpha-amylase	Alpha amylase, catalytic domain	74	438	316.2	2.4e-94
g3000	Pesta-scaffold00005	PF01161.15	PBP	Phosphatidylethanolamine-binding protein	35	187	77	1.3e-21
g3002	Pesta-scaffold00005	PF00656.17	Peptidase_C14	Caspase domain	151	438	231.7	1e-68
g3004	Pesta-scaffold00005	PF00397.21	WW	WW domain	107	137	25.3	9.4e-06
g3010	Pesta-scaffold00005	PF12296.3	HsbA	Hydrophobic surface binding protein A	18	141	43.5	2.4e-11
g3013	Pesta-scaffold00005	PF04082.13	Fungal_trans	Fungal specific transcription factor domain	245	472	80.2	1e-22
g3015	Pesta-scaffold00005	PF00083.19	Sugar_tr	Sugar (and other) transporter	34	488	258.5	9.3e-77
g3016	Pesta-scaffold00005	PF00106.20	adh_short	short chain dehydrogenase	28	198	101.4	4.8e-29
g3018	Pesta-scaffold00005	PF00485.13	PRK	Phosphoribulokinase / Uridine kinase family	36	209	20.8	0.00022
g3020	Pesta-scaffold00005	PF08240.7	ADH_N	Alcohol dehydrogenase GroES-like domain	29	140	109.9	4.9e-32
g3020	Pesta-scaffold00005	PF00107.21	ADH_zinc_N	Zinc-binding dehydrogenase	180	321	81	5.2e-23
g3023	Pesta-scaffold00005	PF00106.20	adh_short	short chain dehydrogenase	22	207	106	1.8e-30
g3025	Pesta-scaffold00005	PF00083.19	Sugar_tr	Sugar (and other) transporter	24	491	422.6	1.5e-126
g3028	Pesta-scaffold00005	PF01738.13	DLH	Dienelactone hydrolase family	37	251	70.1	1.6e-19
g3029	Pesta-scaffold00005	PF14087.1	DUF4267	Domain of unknown function (DUF4267)	16	128	27.4	1.9e-06
g3030	Pesta-scaffold00005	PF14226.1	DIOX_N	non-haem dioxygenase in morphine synthesis N-terminal	6	148	70.7	1.4e-19
g3030	Pesta-scaffold00005	PF03171.15	2OG-FeII_Oxy	2OG-Fe(II) oxygenase superfamily	197	310	64.1	1.1e-17
g3032	Pesta-scaffold00005	PF00350.18	Dynamin_N	Dynamin family	49	245	65.6	4.4e-18
g3032	Pesta-scaffold00005	PF01031.15	Dynamin_M	Dynamin central region	281	437	44.8	6.3e-12
g3035	Pesta-scaffold00005	PF07993.7	NAD_binding_4	Male sterility protein	669	910	133.3	6.4e-39
g3035	Pesta-scaffold00005	PF00501.23	AMP-binding	AMP-binding enzyme	32	369	105.9	1.5e-30
g3035	Pesta-scaffold00005	PF00474.12	SSF	Sodium:solute symporter family	1121	1530	83.5	1.1e-23
g3037	Pesta-scaffold00005	PF06985.6	HET	Heterokaryon incompatibility protein (HET)	47	210	122.4	1.4e-35
g3041	Pesta-scaffold00005	PF08212.7	Lipocalin_2	Lipocalin-like domain	55	201	84.1	7.6e-24
g3042	Pesta-scaffold00005	PF03661.8	UPF0121	Uncharacterised protein family (UPF0121)	11	226	29.2	4.9e-07
g3044	Pesta-scaffold00005	PF00782.15	DSPc	Dual specificity phosphatase, catalytic domain	106	204	32.3	6.1e-08
g3046	Pesta-scaffold00005	PF05721.8	PhyH	Phytanoyl-CoA dioxygenase (PhyH)	49	311	31.2	2.1e-07
g3047	Pesta-scaffold00005	PF12505.3	DUF3712	Protein of unknown function (DUF3712)	160	283	81.4	5.3e-23
g3052	Pesta-scaffold00005	PF01494.14	FAD_binding_3	FAD binding domain	8	376	65.5	4.2e-18
g3055	Pesta-scaffold00005	PF00122.15	E1-E2_ATPase	E1-E2 ATPase	225	483	75.6	2.7e-21
g3055	Pesta-scaffold00005	PF00702.21	Hydrolase	haloacid dehalogenase-like hydrolase	491	871	72.4	6.4e-20
g3056	Pesta-scaffold00005	PF01933.13	UPF0052	Uncharacterised protein family UPF0052	9	428	187.1	4.5e-55
g3058	Pesta-scaffold00005	PF00122.15	E1-E2_ATPase	E1-E2 ATPase	245	498	193.3	2.9e-57
g3058	Pesta-scaffold00005	PF00689.16	Cation_ATPase_C	Cation transporting ATPase, C-terminus	909	1087	158.8	9.5e-47
g3058	Pesta-scaffold00005	PF00702.21	Hydrolase	haloacid dehalogenase-like hydrolase	502	837	110.8	1.2e-31
g3058	Pesta-scaffold00005	PF00690.21	Cation_ATPase_N	Cation transporter/ATPase, N-terminus	168	217	39.5	2.7e-10
g3059	Pesta-scaffold00005	PF00083.19	Sugar_tr	Sugar (and other) transporter	31	510	266	4.7e-79
g3063	Pesta-scaffold00005	PF03959.8	FSH1	Serine hydrolase (FSH1)	1	255	105.6	2.3e-30
g3065	Pesta-scaffold00005	PF00916.15	Sulfate_transp	Sulfate transporter family	275	539	172.3	9.9e-51
g3065	Pesta-scaffold00005	PF13792.1	Sulfate_tra_GLY	Sulfate transporter N-terminal domain with GLY motif	157	240	99.5	5.8e-29
g3065	Pesta-scaffold00005	PF01740.16	STAS	STAS domain	649	775	66.8	9.9e-19
g3066	Pesta-scaffold00005	PF00067.17	p450	Cytochrome P450	107	556	258	1.2e-76
g3068	Pesta-scaffold00005	PF01494.14	FAD_binding_3	FAD binding domain	9	368	117.5	6.6e-34
g3069	Pesta-scaffold00005	PF04828.9	GFA	Glutathione-dependent formaldehyde-activating enzyme	40	135	42.6	4.1e-11
g3076	Pesta-scaffold00005	PF00128.19	Alpha-amylase	Alpha amylase, catalytic domain	41	406	312.9	2.4e-93
g3077	Pesta-scaffold00005	PF07690.11	MFS_1	Major Facilitator Superfamily	15	318	48.7	4.3e-13
g3079	Pesta-scaffold00005	PF00271.26	Helicase_C	Helicase conserved C-terminal domain	415	495	27.6	1.9e-06
[truncated: 12,351 more rows]

## Sheet: Sheet1
Table S7: Summary of protein domains in the genome of Pestalotiopsis sp. KF079.
