# Supplementary material for: Genome Sequencing and analyses of Two Marine Fungi from the North Sea Unraveled a Plethora of Novel Biosynthetic Gene Clusters
Source: Sci Rep. 2018 Jul 5;8:10187. doi: 10.1038/s41598-018-28473-z (PMC6033941; doi:10.1038/s41598-018-28473-z)
Supplement: Supplementary file 10 — Table S9 [file 41598_2018_28473_MOESM10_ESM.xlsx]

## Sheet: Table S9
BGC ID	Genomic Location	Type	From	To	Most similar known BGC (% identity)	MIBiG BGC-ID
mPeBGC1	Pesta-scaffold00001	T1pks-terpene	10717	71152	-	-
mPeBGC2	Pesta-scaffold00001	T3pks	266180	307608	-	-
mPeBGC3	Pesta-scaffold00001	Nrps	1281382	1335348	-	-
mPeBGC4	Pesta-scaffold00002	T1pks	244896	290664	-	-
mPeBGC5	Pesta-scaffold00002	Other	437356	481013	-	-
mPeBGC6	Pesta-scaffold00004	T1pks	855327	904473	-	-
mPeBGC7	Pesta-scaffold00005	Other	668393	713083	-	-
mPeBGC8	Pesta-scaffold00007	T1pks	82937	128495	Pestheic acid (15%)	BGC0000121_c1
mPeBGC9	Pesta-scaffold00007	Terpene	130119	152066	-	-
mPeBGC10	Pesta-scaffold00008	Nrps	756354	810557	-	-
mPeBGC11	Pesta-scaffold00009	Other	638921	682981	-	-
mPeBGC12	Pesta-scaffold00009	T1pks	853963	911577	-	-
mPeBGC13	Pesta-scaffold000010	T1pks	255812	303349	-	-
mPeBGC14	Pesta-scaffold000013	Nrps-t1pks	186371	243502	-	-
mPeBGC15	Pesta-scaffold000014	Other	298345	342019	-	-
mPeBGC16	Pesta-scaffold000014	T1pks	742169	774209	-	-
mPeBGC17	Pesta-scaffold000016	Terpene	89427	110626	-	-
mPeBGC18	Pesta-scaffold000016	Nrps	118335	164650	-	-
mPeBGC19	Pesta-scaffold000016	T1pks	311556	358654	-	-
mPeBGC20	Pesta-scaffold000018	Other	344390	387262	-	-
mPeBGC21	Pesta-scaffold000019	Other	272271	315311	-	-
mPeBGC22	Pesta-scaffold000023	Other	198181	242125	-	-
mPeBGC23	Pesta-scaffold000023	Nrps	471786	505185	-	-
mPeBGC24	Pesta-scaffold000025	Other	283301	326485	-	-
mPeBGC25	Pesta-scaffold000025	Other	383473	426084	-	-
mPeBGC26	Pesta-scaffold000027	T1pks	63182	111362	-	-
mPeBGC27	Pesta-scaffold000027	Other	230638	275181	-	-
mPeBGC28	Pesta-scaffold000029	Other	156689	200216	-	-
mPeBGC29	Pesta-scaffold000031	Terpene	217285	240326	-	-
mPeBGC30	Pesta-scaffold000033	Nrps	135198	205218	-	-
mPeBGC31	Pesta-scaffold000036	Terpene	325693	348259	-	-
mPeBGC32	Pesta-scaffold000036	Other	372825	402401	-	-
mPeBGC33	Pesta-scaffold000040	T1pks	262114	310671	-	-
mPeBGC34	Pesta-scaffold000041	T1pks	98643	147496	-	-
mPeBGC35	Pesta-scaffold000042	Terpene	1	22102	-	-
mPeBGC36	Pesta-scaffold000043	Nrps	1	39394	-	-
mPeBGC37	Pesta-scaffold000043	Nrps	26386	70036	-	-
mPeBGC38	Pesta-scaffold000048	T1pks	110775	157776	-	-
mPeBGC39	Pesta-scaffold000049	Nrps-t1pks	241986	296214	-	-
mPeBGC40	Pesta-scaffold000051	Nrps-t1pks	106058	158525	-	-
mPeBGC41	Pesta-scaffold000052	Terpene	164672	186104	-	-
mPeBGC42	Pesta-scaffold000056	T1pks	122658	184467	-	-
mPeBGC43	Pesta-scaffold000057	Terpene	1228	24262	-	-
mPeBGC44	Pesta-scaffold000062	T1pks	37225	84067	-	-
mPeBGC45	Pesta-scaffold000062	T1pks	155234	202912	-	-
mPeBGC46	Pesta-scaffold000068	T1pks	92027	139252	-	-
mPeBGC47	Pesta-scaffold000069	Nrps	176835	225015	-	-
mPeBGC48	Pesta-scaffold000070	T1pks	22408	69763	-	-
mPeBGC49	Pesta-scaffold000071	Nrps	146192	192650	-	-
mPeBGC50	Pesta-scaffold000072	Terpene-t1pks	172081	222438	Pestheic acid (25%)	BGC0000121_c1
mPeBGC51	Pesta-scaffold000074	T1pks	143864	191328	-	-
mPeBGC52	Pesta-scaffold000077	T1pks	1	36669	-	-
mPeBGC53	Pesta-scaffold000077	T1pks	155326	203867	-	-
mPeBGC54	Pesta-scaffold000078	T1pks	111029	165417	-	-
mPeBGC55	Pesta-scaffold000085	Lantipeptide	75523	109477	-	-
mPeBGC56	Pesta-scaffold000089	Other	18426	61996	-	-
mPeBGC57	Pesta-scaffold000091	Other	42146	86023	-	-
mPeBGC58	Pesta-scaffold000104	Other	45346	89340	-	-
mPeBGC59	Pesta-scaffold000105	Nrps	908	54095	-	-
mPeBGC60	Pesta-scaffold000115	T1pks	33331	80911	-	-
mPeBGC61	Pesta-scaffold000116	Nrps	7288	56541	-	-
mPeBGC62	Pesta-scaffold000133	Nrps	1	28832	-	-
mPeBGC63	Pesta-scaffold000156	Terpene	1	18334	-	-
mPeBGC64	Pesta-scaffold000158	Hglks-t1pks	1	30701	-	-
mPeBGC65	Pesta-scaffold000160	Other	1	24731	-	-
mPeBGC66	Pesta-scaffold000173	Terpene	1	13495	-	-
mPeBGC67	Pesta-scaffold000184	T1pks	1	8970	-	-

## Sheet: Legend
Table S9: Summary of biosynthetic gene clusters of Pestalotiopsis sp.
