# Supplementary material for: Genome Sequencing and analyses of Two Marine Fungi from the North Sea Unraveled a Plethora of Novel Biosynthetic Gene Clusters
Source: Sci Rep. 2018 Jul 5;8:10187. doi: 10.1038/s41598-018-28473-z (PMC6033941; doi:10.1038/s41598-018-28473-z)
Supplement: Supplementary file 11 — Table S10 [file 41598_2018_28473_MOESM11_ESM.xlsx]

## Sheet: Table S10 A. Overview
	GH	GT	PL	CE	CBM	AA	Total
Verticillium dahliae	268	101	35	50	92	76	622
Colletotrichum graminicola	293	103	15	50	95	106	662
Colletotrichum higginsianum	357	125	42	62	117	132	835
Nectria haematococca	335	121	34	44	98	89	721
Fusarium graminearum	245	107	20	45	89	72	578
Fusarium oxysporum	384	130	23	53	149	121	860
Metarhizium anisopliae	187	121	3	10	52	55	428
Metarhizium acridum	171	109	3	10	24	43	360
Trichoderma atroviride	256	98	8	21	87	35	505
Trichoderma virens	269	101	6	24	111	42	553
Trichoderma reesei	200	92	5	16	58	33	404
Magnaporthe oryzae	259	102	5	51	119	93	629
Neurospora crassa	192	94	4	24	71	54	439
Scopulariopsis brevicaulis	227	81	15	34	50	71	478
Pestalotiopsis fici	387	121	26	74	90	160	858
Pestalotiopsis sp.	423	122	35	80	134	155	949
Calcarisporium sp.	234	102	8	32	37	63	476

## Sheet: Table S10 B. compare families
GH family	1	2	3	4	5	6	7	10	11	12	13	15	16	17	18	20	23	24	25	26	27	28	29	30	31	32	33	35	36	37	38	39	42	43	45	47	49	51	53	54	55	62	63	64	65	67	71	72	74
Verticillium dahliae VdLs.17 (Verda1)	3	6	17	0	14	4	6	4	5	6	8	4	12	7	20	3	0	1	0	1	5	12	0	1	9	3	1	5	1	2	2	1	0	22	2	8	1	2	1	1	3	0	1	2	0	1	2	4	2
Glomerella graminicola M1.001 (Colgr1)	2	7	18	0	15	4	6	10	6	6	13	3	22	7	22	3	0	0	0	1	4	9	2	2	6	3	0	5	2	2	2	0	0	18	2	11	0	2	2	1	5	2	1	1	1	1	5	6	1
Colletotrichum higginsianum IMI 349063 v2	1	7	29	0	22	4	8	7	5	10	16	5	26	8	24	3	0	0	0	1	3	15	1	3	7	0	0	5	2	3	1	0	0	24	1	14	0	3	2	0	9	1	1	2	0	1	8	4	4
Nectria haematococca mpVI 77-13-4 (Necha2)	5	11	38	0	18	1	3	3	3	6	9	2	21	6	27	4	1	3	0	0	2	11	0	0	9	6	2	8	2	2	1	1	0	32	1	10	1	4	1	1	5	2	1	2	0	0	5	3	1
Fusarium graminearum PH-1 (Fusgr1)	3	10	21	0	14	1	2	5	3	4	8	3	23	6	18	3	0	0	0	0	2	6	1	0	8	5	1	3	3	2	1	2	0	17	1	10	0	2	1	1	3	1	1	2	0	1	0	4	1
Fusarium oxysporum f. sp. lycopersici 4287 (Fusox1)	6	9	33	0	21	1	3	5	3	4	12	3	27	7	30	4	0	1	0	0	4	15	2	3	10	16	1	7	3	2	1	4	0	35	1	10	1	3	2	1	3	1	1	8	1	2	2	3	1
Metarhizium anisopliae (Metan1)	3	6	9	0	8	0	0	0	0	1	6	2	21	6	27	2	1	2	2	0	3	1	1	0	6	1	1	3	2	2	1	0	0	1	0	8	0	0	0	1	5	0	1	1	2	0	1	5	0
Metarhizium acridum CQMa 102 (Metac1)	3	6	7	0	9	0	0	0	0	1	6	2	19	6	19	2	1	2	2	0	2	1	2	0	6	2	1	3	2	2	1	0	0	1	0	9	0	0	0	0	5	0	1	1	1	0	1	5	0
Trichoderma atroviride IMI 206040	4	10	15	0	11	1	2	1	4	3	5	3	17	6	31	3	1	0	1	0	9	6	0	5	7	1	0	1	2	2	1	2	0	6	1	8	0	1	0	2	8	2	1	3	2	2	4	5	1
Trichoderma virens Gv29-8	2	11	17	0	12	1	2	2	4	4	6	2	17	6	37	3	0	1	1	2	11	6	0	6	5	1	0	1	2	2	2	1	0	3	2	8	1	0	0	2	10	3	1	3	2	2	5	6	1
Trichoderma reesei (Trire2)	2	8	13	0	8	1	2	1	3	2	5	2	16	5	20	3	0	1	1	0	8	4	0	5	4	0	0	1	2	2	1	1	0	2	1	8	0	0	0	2	6	1	1	3	2	1	4	5	1
Magnaporthe oryzae MG8.23 v8 Ensembl	2	8	18	0	13	3	5	6	5	4	9	2	18	7	16	3	0	0	0	0	4	4	4	1	6	5	1	0	2	2	2	1	0	19	1	9	0	3	1	1	7	4	2	2	0	1	1	5	1
Neurospora crassa (Neucr2)	2	6	11	0	6	3	5	4	2	2	11	2	15	6	13	2	0	0	1	1	0	2	0	2	6	2	0	2	1	2	1	0	0	7	1	9	0	1	1	1	6	0	2	2	0	1	7	5	1
Scopulariopsis brevicaulis	4	8	24	1	13	4	4	5	5	2	11	1	12	4	13	4	0	1	0	1	2	2	0	1	8	4	1	3	2	2	1	0	0	19	1	6	0	2	1	1	5	2	2	0	0	1	1	4	1
Pestalotiopsis sp.	4	12	38	0	21	4	6	4	3	3	9	4	23	6	21	2	0	0	0	0	6	18	2	8	8	3	1	10	2	2	1	4	1	33	3	9	1	3	1	1	8	2	3	3	0	1	3	7	1
Pestalotiopsis fici	5	14	43	0	20	4	6	5	4	3	9	4	22	6	28	2	0	0	0	0	7	22	2	6	8	4	1	10	3	2	1	6	1	33	2	10	2	4	1	1	10	2	2	3	0	2	2	6	1
Calcarisporium sp.	2	9	11	0	12	1	2	1	1	2	7	1	20	6	17	4	0	2	2	0	3	5	2	1	8	3	0	3	2	2	1	0	0	12	1	9	0	1	0	2	4	0	1	3	1	1	4	4	0
GT family	1	2	3	4	5	8	15	17	20	21	22	24	25	31	32	33	34	35	39	41	48	50	55	57	58	59	61	62	64	66	69	71	76	90	Total
Verticillium dahliae VdLs.17 (Verda1)	12	17	1	6	0	4	5	0	3	1	4	1	0	9	3	1	5	1	3	1	2	1	0	2	1	1	1	3	2	1	2	0	1	7	101
Glomerella graminicola M1.001 (Colgr1)	15	16	1	5	3	5	4	2	3	1	4	1	2	5	4	1	2	1	3	1	1	1	0	2	1	1	0	3	0	1	4	4	1	5	103
Colletotrichum higginsianum IMI 349063 v2	23	18	1	5	3	6	4	2	4	1	6	1	2	6	4	1	2	1	5	2	1	1	0	2	1	3	0	3	0	1	5	4	1	6	125
Nectria haematococca mpVI 77-13-4 (Necha2)	20	21	1	7	0	7	5	1	3	1	4	1	0	5	10	1	2	1	3	1	2	1	0	2	1	1	0	3	2	1	5	3	1	5	121
Fusarium graminearum PH-1 (Fusgr1)	18	20	1	5	0	6	4	2	3	1	4	1	0	5	5	1	2	1	3	1	1	1	0	2	1	1	0	3	2	1	1	4	1	6	107
Fusarium oxysporum f. sp. lycopersici 4287 (Fusox1)	23	23	1	9	0	12	4	2	3	1	4	1	0	6	6	1	3	1	3	1	1	1	0	2	1	1	0	3	2	1	4	3	1	6	130
Metarhizium anisopliae (Metan1)	13	15	1	7	0	6	4	2	4	1	4	1	8	12	10	1	4	1	3	1	1	1	0	2	1	1	2	3	1	1	2	1	1	6	121
Metarhizium acridum CQMa 102 (Metac1)	14	13	1	7	0	6	4	1	4	1	4	1	4	10	9	1	3	1	3	1	1	1	0	2	1	1	1	3	1	1	3	0	1	5	109
Trichoderma atroviride IMI 206040	8	13	1	5	0	4	4	1	5	1	4	1	0	9	10	1	2	1	3	1	1	1	0	2	1	1	0	3	2	1	3	1	1	7	98
Trichoderma virens Gv29-8	9	15	1	5	0	4	4	1	5	1	4	1	1	8	9	1	2	1	3	1	1	1	0	2	1	1	1	3	2	1	4	1	1	6	101
Trichoderma reesei (Trire2)	8	13	1	5	0	3	4	1	4	1	4	1	1	7	8	1	2	1	3	1	1	1	0	2	1	1	0	3	2	1	3	1	1	6	92
Magnaporthe oryzae MG8.23 v8 Ensembl	13	12	1	4	1	2	4	1	3	1	4	1	7	4	8	1	2	1	3	1	1	1	0	2	1	1	3	3	0	1	4	4	1	6	102
Neurospora crassa (Neucr2)	11	13	4	6	2	4	5	1	3	1	4	1	2	4	4	1	3	1	4	1	1	1	1	2	1	1	0	3	0	1	2	1	1	4	94
Scopulariopsis brevicaulis	8	12	3	5	0	4	5	0	0	1	4	1	1	7	3	1	2	1	3	1	1	1	0	2	1	1	0	3	0	1	3	2	1	3	81
Pestalotiopsis sp.	19	16	1	7	0	5	6	1	3	1	4	1	2	14	9	1	2	1	3	1	1	1	0	2	1	1	0	4	0	1	3	3	1	6	121
Pestalotiopsis fici	19	20	1	6	0	4	6	1	3	1	4	1	6	13	5	1	2	1	3	1	1	1	0	2	1	1	0	4	0	1	3	2	1	7	122
Calcarisporium sp.	12	13	1	5	1	7	4	0	6	1	4	1	2	9	8	1	2	1	3	1	2	1	0	2	1	1	0	3	0	1	2	0	0	7	102
PL family	1	3	4	7	8	9	11	20
Verticillium dahliae VdLs.17 (Verda1)	17	11	4	0	0	2	1	0	35
Glomerella graminicola M1.001 (Colgr1)	7	4	3	0	0	1	0	0	15
Colletotrichum higginsianum IMI 349063 v2	18	14	6	0	0	4	0	0	42
Nectria haematococca mpVI 77-13-4 (Necha2)	14	11	5	1	0	1	1	1	34
Fusarium graminearum PH-1 (Fusgr1)	9	7	2	0	0	1	0	1	20
Fusarium oxysporum f. sp. lycopersici 4287 (Fusox1)	10	7	3	0	0	2	1	0	23
Metarhizium anisopliae (Metan1)	0	0	0	1	1	0	0	1	3
Metarhizium acridum CQMa 102 (Metac1)	0	0	0	1	1	0	0	1	3
Trichoderma atroviride IMI 206040	2	0	0	3	1	0	0	2	8
Trichoderma virens Gv29-8	0	0	0	3	1	0	0	2	6
Trichoderma reesei (Trire2)	0	0	0	2	1	0	0	2	5
Magnaporthe oryzae MG8.23 v8 Ensembl	2	1	1	0	0	0	0	1	5
Neurospora crassa (Neucr2)	1	1	1	0	0	0	0	1	4
Scopulariopsis brevicaulis	6	4	3	0	0	1	1	0	15
Pestalotiopsis sp.	13	7	5	0	0	1	0	0	26
Pestalotiopsis fici	19	7	7	0	0	1	1	0	35
Calcarisporium sp.	1	1	1	3	1	0	0	1	8
CE family	1	2	3	4	5	8	9	12	15	16	Total
Verticillium dahliae VdLs.17 (Verda1)	5	0	6	8	14	8	1	4	1	3	50
Glomerella graminicola M1.001 (Colgr1)	7	0	5	14	12	3	1	4	1	3	50
Colletotrichum higginsianum IMI 349063 v2	6	0	4	15	14	10	1	3	3	6	62
Nectria haematococca mpVI 77-13-4 (Necha2)	1	1	11	6	8	8	2	2	0	5	44
Fusarium graminearum PH-1 (Fusgr1)	4	1	5	7	12	7	1	3	0	5	45
Fusarium oxysporum f. sp. lycopersici 4287 (Fusox1)	7	1	6	9	12	8	1	4	0	5	53
Metarhizium anisopliae (Metan1)	1	0	1	3	2	0	1	0	0	2	10
Metarhizium acridum CQMa 102 (Metac1)	2	0	1	2	2	0	1	0	0	2	10
Trichoderma atroviride IMI 206040	3	0	4	3	5	1	1	0	1	3	21
Trichoderma virens Gv29-8	4	0	3	4	6	2	1	0	1	3	24
Trichoderma reesei (Trire2)	2	0	3	3	4	0	1	0	1	2	16
Magnaporthe oryzae MG8.23 v8 Ensembl	8	1	6	11	17	1	1	3	1	2	51
Neurospora crassa (Neucr2)	6	0	3	5	3	2	1	1	1	2	24
Scopulariopsis brevicaulis	6	1	10	4	6	1	1	1	1	3	34
Pestalotiopsis sp.	9	1	9	10	18	9	1	5	3	9	74
Pestalotiopsis fici	8	1	12	10	16	9	1	6	3	14	80
Calcarisporium sp.	3	1	6	3	11	0	1	1	1	5	32
CBM family	1	6	12	13	14	18	20	21	24	32	35	38	42	43	48	50	52	63	66	Tortal
Verticillium dahliae VdLs.17 (Verda1)	26	0	0	0	0	25	4	0	6	0	4	1	2	1	4	18	0	1	0	92
Glomerella graminicola M1.001 (Colgr1)	21	1	0	0	0	29	3	1	5	0	5	0	1	2	3	23	0	1	0	95
Colletotrichum higginsianum IMI 349063 v2	17	0	0	0	0	28	3	1	16	0	5	0	0	1	6	38	0	2	0	117
Nectria haematococca mpVI 77-13-4 (Necha2)	12	0	0	1	0	34	2	2	6	3	3	1	1	1	3	26	0	3	0	98
Fusarium graminearum PH-1 (Fusgr1)	12	1	0	2	0	34	2	2	0	3	3	0	1	1	3	22	0	3	0	89
Fusarium oxysporum f. sp. lycopersici 4287 (Fusox1)	15	1	4	1	0	36	2	29	3	4	4	3	1	1	2	40	0	3	0	149
Metarhizium anisopliae (Metan1)	4	0	0	1	0	8	1	2	3	1	0	0	1	2	2	26	0	0	1	52
Metarhizium acridum CQMa 102 (Metac1)	2	0	0	1	0	3	1	2	1	1	0	0	0	2	3	5	0	0	3	24
Trichoderma atroviride IMI 206040	22	1	0	6	0	21	3	1	4	0	1	0	2	2	3	18	0	0	3	87
Trichoderma virens Gv29-8	24	0	0	3	0	23	1	1	4	0	1	0	2	3	3	41	0	0	5	111
Trichoderma reesei (Trire2)	14	0	0	2	0	8	1	1	4	2	0	0	2	2	3	17	0	0	2	58
Magnaporthe oryzae MG8.23 v8 Ensembl	25	2	0	1	0	58	2	1	0	0	3	0	2	2	3	17	1	1	1	119
Neurospora crassa (Neucr2)	21	0	0	1	0	9	3	2	9	1	0	1	0	1	4	18	1	0	0	71
Scopulariopsis brevicaulis	9	0	0	1	0	16	2	2	0	0	3	0	0	1	2	13	0	1	0	50
Pestalotiopsis sp.	14	1	0	2	0	21	7	1	3	1	3	0	1	3	4	27	0	1	1	90
Pestalotiopsis fici	14	1	0	4	0	49	5	1	5	1	4	0	1	3	3	41	0	1	1	134
Calcarisporium sp.	10	0	0	2	2	5	1	3	2	2	0	0	2	1	3	1	1	0	2	37
AA family	1	2	3	4	5	6	7	8	9	11	12	13	Total
Verticillium dahliae VdLs.17 (Verda1)	5	4	24	0	2	1	3	4	27	2	3	1	76
Glomerella graminicola M1.001 (Colgr1)	18	7	31	1	4	1	4	5	28	3	3	1	106
Colletotrichum higginsianum IMI 349063 v2	25	8	46	3	3	1	6	5	25	4	5	1	132
Nectria haematococca mpVI 77-13-4 (Necha2)	13	2	33	7	3	1	6	5	12	5	1	1	89
Fusarium graminearum PH-1 (Fusgr1)	14	3	20	1	5	1	2	7	12	4	2	1	72
Fusarium oxysporum f. sp. lycopersici 4287 (Fusox1)	21	3	34	4	5	1	2	14	16	4	15	2	121
Metarhizium anisopliae (Metan1)	18	2	17	0	2	1	2	3	1	7	2	0	55
Metarhizium acridum CQMa 102 (Metac1)	11	3	13	0	2	1	3	3	1	5	1	0	43
Trichoderma atroviride IMI 206040	10	1	11	0	1	1	2	3	3	2	1	0	35
Trichoderma virens Gv29-8	9	1	16	0	1	1	1	5	3	4	1	0	42
Trichoderma reesei (Trire2)	8	1	12	0	1	1	1	2	3	3	1	0	33
Magnaporthe oryzae MG8.23 v8 Ensembl	15	5	23	0	4	1	2	9	22	7	4	1	93
Neurospora crassa (Neucr2)	10	3	7	0	2	1	2	7	14	4	3	1	54
Scopulariopsis brevicaulis	3	2	23	3	1	1	4	5	20	5	2	2	71
Pestalotiopsis sp.	26	4	66	3	5	1	8	10	27	5	3	2	160
Pestalotiopsis fici	25	6	62	2	4	1	6	10	28	6	3	2	155
Calcarisporium sp.	10	2	29	0	2	1	3	4	5	5	2	0	63
[truncated: 26 more columns]

## Sheet: Table S10 C. GH5 subfamilies
Fam_Subf	Metabolism	Verticillium_dahliae_VdLs.17_(Verda1)	Glomerella_graminicola_M1.001_(Colgr1)	Colletotrichum_higginsianum_IMI_349063_v2	Nectria_haematococca_mpVI_77-13-4_(Necha2)	Fusarium_graminearum_PH-1_(Fusgr1)	Fusarium_oxysporum_f._sp._lycopersici_4287_(Fusox1)	Metarhizium_anisopliae_(Metan1)	Metarhizium_acridum_CQMa_102_(Metac1)	Trichoderma_atroviride_IMI_206040	Trichoderma_virens_Gv29-8		Magnaporthe_oryzae_MG8.23_v8_Ensembl	Neurospora_crassa_(Neucr2)	Scopulariopsis brevicaulis	Pestalotiopsis_sp.	Pestalotiopsis_fici	Calcarisporium sp.
GH5	b-1,3-mannanase; endoglycosylceramidase; chitosanase; xyloglucan-specific endo-b-1,4-glucanase / endo-xyloglucanase; b-glucosidase; b-mannosidase; endo-b-1,4-glucanase; b-glucosylceramidase; exo-b-1,3-glucanase; lichenase / endo-b-1,3-1,4-glucanase; exo-b-1,4-glucanase / cellodextrinase; endo-b-1,6-glucanase; endo-b-1,4-mannanase; endo-b-1,4-xylanase; cellobiohydrolase; hesperidin 6-O-a-L-rhamnos…	1	0	0	0	0	1	0	0	0	0	0	0	0	0	0	0	0
GH5_11	b-glycosidase	0	1	1	0	0	0	1	1	0	0	0	1	0	1	1	1	1
GH5_12	b-glycosidase	1	2	2	2	2	2	1	2	1	1	1	1	1	1	3	3	1
GH5_15	endo-b-1,6-glucanase	0	1	1	3	2	3	1	1	2	2	1	0	0	0	0	1	3
GH5_16	endo-b-1,6-galactanase	2	3	4	1	1	2	0	0	0	0	0	3	1	0	3	2	0
GH5_22	b-glycosidase	2	1	3	4	2	2	1	1	0	2	0	2	0	3	1	1	0
GH5_23	b-primeverosidase; hesperidin 6-O-a-L-rhamnosyl-b-glucosidase	0	0	0	0	1	2	0	0	0	0	0	0	0	1	2	3	0
GH5_24		1	1	1	1	1	1	1	1	1	1	1	1	1	1	1	1	1
GH5_27	endoglycosylceramidase	0	0	0	0	0	1	1	1	0	0	0	0	0	0	0	0	0
GH5_31	b-1,3-mannanase	0	0	0	0	0	1	0	0	0	0	0	0	0	0	0	0	2
GH5_4	xyloglucan-specific endo-b-1,4-glucanase / endo-xyloglucanase; endo-b-1,4-glucanase; lichenase / endo-b-1,3-1,4-glucanase; endo-b-1,4-xylanase	1	0	1	0	0	0	0	0	0	0	0	0	0	0	2	2	1
GH5_5	endo-b-1,4-glucanase	1	3	4	3	2	3	1	1	3	3	2	2	1	2	5	3	1
GH5_7	b-mannosidase; endo-b-1,4-mannanase; [retaining] b-1,4-mannan transglycosylase	4	2	4	3	2	1	0	0	2	1	1	2	1	2	2	2	0
GH5_9	exo-b-1,3-glucanase	1	1	1	1	1	1	1	1	1	1	1	1	1	2	1	1	1
GH5_dist		0	0	0	0	0	1	0	0	1	1	1	0	0	0	0	0	1

## Sheet: Table S10 - Legend
Table S10: Overview of comparative cazyome analyses in selected fungi.
AA - auxiliary activities, GH - glycoside hydrolases, GT - glycosyltransferases, PL - polysaccharide lyases, CE - carbohydrate esterases and CBM - carbohydrate-binding modules
